# Supplementary material
Source: PubMed Central journal article supplement (PMC3218358)

Table S2.  
Subfamily 2A.

| KS2-SubA  |                                                |           |                                                                                      |                                                         |                |                                        |     |
|-----------|------------------------------------------------|-----------|--------------------------------------------------------------------------------------|---------------------------------------------------------|----------------|----------------------------------------|-----|
| Type      | Sequence                                       | EC Number | Organism                                                                             | GenBank ID                                              | RefSeq         | UniProt                                | PDB |
| Eukaryota | Very long-chain fatty acid condensing enzyme 8 | 2.3.1.-   | <i>Arabidopsis thaliana</i> (Mouse-ear cress).                                       | AAD03366.1,<br>AAV56418.1,<br>BAF00913.1                | NP_179113.2    | Q4V3C9 [T],<br>Q4V3C9.1                |     |
| Eukaryota | Putative uncharacterized protein               |           | <i>Arabidopsis lyrata</i> subsp. <i>lyrata</i> .                                     | EFH60138.1                                              | XP_002883879.1 | D7L3J1                                 |     |
| Eukaryota | Putative uncharacterized protein               |           | <i>Arabidopsis lyrata</i> subsp. <i>lyrata</i> .                                     | EFH45421.1                                              | XP_002869162.1 | D7MF36                                 |     |
| Eukaryota | At4g34250                                      | 2.3.1.-   | <i>Arabidopsis thaliana</i> (Mouse-ear cress).                                       | ABP88112.1,<br>BAF01126.1,<br>CAB36702.1,<br>CAB80142.1 | NP_195151.1    | A4VCL7 [T],<br>Q9SYZ0 [T],<br>Q9SYZ0.1 |     |
| Eukaryota | 3-ketoacyl-CoA synthase                        |           | <i>Arabidopsis lyrata</i> subsp. <i>lyrata</i> .                                     | EFH60422.1                                              | XP_002884163.1 | D7L154                                 |     |
| Eukaryota | 3-ketoacyl-CoA synthase                        |           | <i>Lesquerella fendleri</i> (Fendler's bladderpod).                                  | AAU05611.1                                              |                | Q670P4                                 |     |
| Eukaryota | 3-ketoacyl-CoA synthase                        |           | <i>Lesquerella fendleri</i> (Fendler's bladderpod).                                  | AAK62348.1                                              |                | Q93XD5                                 |     |
| Eukaryota | 3-ketoacyl-CoA synthase                        |           | <i>Cardamine graeca</i> .                                                            | ACJ61778.1                                              |                | C6FDV1 [T]                             |     |
| Eukaryota | Beta-ketoacyl-CoA synthase                     |           | <i>Orychophragmus violaceus</i> (Chinese violet cress) ( <i>Brassica violacea</i> ). | AAX58618.1                                              |                | Q56NH7                                 |     |
| Eukaryota | 3-ketoacyl-CoA synthase                        |           | <i>Teesdalia nudicaulis</i> .                                                        | ABM65880.1                                              |                | A2IB85                                 |     |
| Eukaryota | Beta-ketoacyl-CoA synthase                     |           | <i>Sinapis arvensis</i> (Charlock mustard) ( <i>Brassica kaber</i> ).                | AAX58617.1                                              |                | Q56NH8                                 |     |
| Eukaryota | Beta-ketoacyl-CoA synthase                     |           | <i>Sinapis alba</i> (White mustard) ( <i>Brassica hirta</i> ).                       | AAX58616.1                                              |                | Q56NH9                                 |     |

|           |                                   |  |                                                          |                                          |  |            |  |
|-----------|-----------------------------------|--|----------------------------------------------------------|------------------------------------------|--|------------|--|
| Eukaryota | Fatty acid elongase 1             |  | Brassica campestris (Field mustard).                     | CAC79669.1                               |  | Q8VXU2     |  |
| Eukaryota | 3-ketoacyl-CoA synthase           |  | Crambe abyssinica (Abyssinian crambe) (Abyssinian kale). | AAX22298.1                               |  | Q32VC2     |  |
| Eukaryota | Beta-ketoacyl-CoA synthase        |  | Sinapis arvensis (Charlock mustard) (Brassica kaber).    | ACP19737.1                               |  | C3VJR0     |  |
| Eukaryota | Beta-ketoacyl-CoA synthase FAE1.2 |  | Brassica juncea (Indian mustard) (Sinapis juncea).       | CAD90160.1                               |  | Q84LN5     |  |
| Eukaryota | Fatty acid elongase 1             |  | Brassica campestris (Field mustard).                     | CAC79670.1                               |  | Q8VXU1     |  |
| Eukaryota | Fatty acid elongase 1             |  | Brassica oleracea (Wild cabbage).                        | CAC79671.1                               |  | Q8VXT6     |  |
| Eukaryota | Fatty acid elongase               |  | Brassica napus (Rape).                                   | AAA96054.1                               |  | Q39310 [T] |  |
| Eukaryota | 3-ketoacyl-CoA synthase           |  | Brassica campestris (Field mustard).                     | AAM08352.1                               |  | Q8S3A1     |  |
| Eukaryota | Beta-ketoacyl-CoA synthase FAE1.1 |  | Brassica juncea (Indian mustard) (Sinapis juncea).       | CAD90159.1                               |  | Q84MZ6     |  |
| Eukaryota | FAE1                              |  | Brassica campestris (Field mustard).                     | ADB85635.1                               |  | D3JXE7     |  |
| Eukaryota | 3-ketoacyl-CoA synthase           |  | Brassica napus (Rape).                                   | AAB72178.1                               |  | O23738 [T] |  |
| Eukaryota | Fatty acid elongase               |  | Brassica napus (Rape).                                   | AAK64213.1,<br>ACB55611.1,<br>ADB85629.1 |  | Q93XF0 [T] |  |
| Eukaryota | FAE1                              |  | Brassica campestris (Field mustard).                     | ADB85636.1,<br>ADB85637.1                |  | D3JXE8     |  |

|           |                            |  |                                   |                           |  |        |  |
|-----------|----------------------------|--|-----------------------------------|---------------------------|--|--------|--|
| Eukaryota | Beta-ketoacyl-CoA synthase |  | Brassica napus (Rape).            | AAX58620.1                |  | Q56NH5 |  |
| Eukaryota | FAE1                       |  | Brassica napus (Rape).            | AAX58619.1,<br>ADB85630.1 |  | Q56NH6 |  |
| Eukaryota | 3-ketoacyl-CoA synthase    |  | Brassica napus (Rape).            | AAM08353.1                |  | Q8S3A0 |  |
| Eukaryota | FAE1                       |  | Brassica oleracea (Wild cabbage). | ADB85640.1                |  | D3JXF2 |  |
| Eukaryota | FAE1                       |  | Brassica oleracea (Wild cabbage). | ADB85641.1                |  | D3JXF3 |  |
| Eukaryota | 3-ketoacyl-CoA synthase    |  | Brassica napus (Rape).            | AAM08350.1                |  | Q8S3A3 |  |
| Eukaryota | FAE1                       |  | Brassica oleracea (Wild cabbage). | ADB85642.1,<br>ADB85643.1 |  | D3JXF4 |  |
| Eukaryota | Beta-ketoacyl-CoA synthase |  | Brassica napus (Rape).            | ABV53972.1                |  | A8D2G7 |  |
| Eukaryota | Fatty acid elongase        |  | Brassica napus (Rape).            | ACB55612.1,<br>ADB85631.1 |  | B2CQF6 |  |
| Eukaryota | Truncated FAE1             |  | Brassica napus (Rape).            | ADB85632.1,<br>ADB85634.1 |  | D3JXE4 |  |
| Eukaryota | 3-ketoacyl-CoA synthase    |  | Brassica oleracea (Wild cabbage). | AAM08351.1                |  | Q8S3A2 |  |
| Eukaryota | Truncated FAE1             |  | Brassica napus (Rape).            | ADB85633.1                |  | D3JXE5 |  |
| Eukaryota | Beta-ketoacyl-CoA synthase |  | Brassica napus (Rape).            | AAX58614.1                |  | Q56NI1 |  |

|           |                                  |                      |                                                    |                                          |                |                         |  |
|-----------|----------------------------------|----------------------|----------------------------------------------------|------------------------------------------|----------------|-------------------------|--|
| Eukaryota | Fatty acid elongation 1          |                      | Brassica juncea (Indian mustard) (Sinapis juncea). | CAA71898.1                               |                | P93058                  |  |
| Eukaryota | Fatty acid elongase              |                      | Brassica campestris (Field mustard).               | AAM33539.1                               |                | Q8LSC7                  |  |
| Eukaryota | Fatty acid elongase              |                      | Brassica juncea (Indian mustard) (Sinapis juncea). | AAM11648.1,<br>AAM34043.1                |                | Q8S384                  |  |
| Eukaryota | Putative uncharacterized protein |                      | Arabidopsis lyrata subsp. lyrata.                  | EFH45401.1                               | XP_002869142.1 | D7MF05                  |  |
| Eukaryota | Protein FATTY ACID ELONGATION 1  | 2.3.1.-<br>2.3.1.119 | Arabidopsis thaliana (Mouse-ear cress).            | AAA70154.1,<br>CAA18831.1,<br>CAB80169.1 | NP_195178.1    | Q38860 [P],<br>Q38860.1 |  |
|           |                                  |                      |                                                    |                                          |                |                         |  |

Subfamily 2B.

SubB

| Type      | Sequence                                       | EC Number            | Organism                                     | GenBank ID                                                             | RefSeq         | UniProt                 | PDB |
|-----------|------------------------------------------------|----------------------|----------------------------------------------|------------------------------------------------------------------------|----------------|-------------------------|-----|
| Eukaryota | hypothetical protein                           |                      | Selaginella moellendorffii                   | EFJ19349.1                                                             | XP_002979460.1 |                         |     |
| Eukaryota | hypothetical protein                           |                      | Selaginella moellendorffii                   | EFJ21203.1                                                             | XP_002977865.1 |                         |     |
| Eukaryota | Very long-chain fatty acid condensing enzyme 2 | 2.3.1.-<br>2.3.1.119 | Arabidopsis thaliana (Mouse-ear cress).      | CAA18830.1,<br>CAB80168.1                                              | NP_195177.1    | O65677 [T],<br>O65677.1 |     |
| Eukaryota | 3-ketoacyl-CoA synthase 2                      |                      | Arabidopsis lyrata subsp. lyrata.            | EFH45402.1                                                             | XP_002869143.1 | D7MF06                  |     |
| Eukaryota | Putative uncharacterized protein               |                      | Oryza sativa subsp. indica (Rice).           | EAY99068.1                                                             |                | A2Y7K8                  |     |
| Eukaryota | cDNA clone:J033025C07, full insert sequence    |                      | Oryza sativa subsp. japonica (Rice).         | AAU10670.1,<br>BAF18268.1,<br>BAG94915.1,<br>BAG99710.1,<br>EEE64728.1 | NP_001056354.1 | Q688V9 [T]              |     |
| Eukaryota | Acyltransferase                                |                      | Zea mays (Maize).                            | ACG28710.1                                                             | NP_001130522.1 | B6SV27 [T]              |     |
| Eukaryota | Putative uncharacterized protein Sb09g028860   |                      | Sorghum bicolor (Sorghum) (Sorghum vulgare). | EES19964.1                                                             | XP_002441534.1 | C5YVX8                  |     |
| Eukaryota | Putative uncharacterized protein               |                      | Zea mays (Maize).                            | ACN30819.1                                                             | NP_001168833.1 | C0P9H4 [T]              |     |

|           |                                                |           |                                                                                       |                           |                |                         |  |
|-----------|------------------------------------------------|-----------|---------------------------------------------------------------------------------------|---------------------------|----------------|-------------------------|--|
| Eukaryota | Putative uncharacterized protein               |           | Arabidopsis lyrata subsp. lyrata.                                                     | EFH60419.1                | XP_002884160.1 | D7L149                  |  |
| Eukaryota | Very long-chain fatty acid condensing enzyme 9 | 2.3.1.-   | Arabidopsis thaliana (Mouse-ear cress).                                               | AAD22309.1                | NP_179223.1    | Q9SIX1 [T],<br>Q9SIX1.1 |  |
| Eukaryota | PREDICTED: hypothetical protein isoform 1      |           | Vitis vinifera                                                                        |                           | XP_002282403.1 |                         |  |
| Eukaryota | 3-ketoacyl-CoA synthase                        | 2.3.1.119 | Camellia oleifera.                                                                    | ACQ41892.1                |                | C3VPA4 [T]              |  |
| Eukaryota | Very long-chain fatty acid condensing enzyme 4 | 2.3.1.-   | Arabidopsis thaliana (Mouse-ear cress).                                               | AAF79428.1,<br>ACE79746.1 | NP_173376.1    | Q9LN49 [T],<br>Q9LN49.1 |  |
| Eukaryota | Putative uncharacterized protein               |           | Arabidopsis lyrata subsp. lyrata.                                                     | EFH66600.1                | XP_002890341.1 | D7KI29                  |  |
| Eukaryota | Predicted protein                              |           | Populus trichocarpa (Western balsam poplar) (Populus balsamifera subsp. trichocarpa). | EEE99625.1                | XP_002321310.1 | B9IBF7                  |  |
| Eukaryota | Acyltransferase, putative                      |           | Ricinus communis (Castor bean).                                                       | EEF52581.1                | XP_002510394.1 | B9R7V1                  |  |
| Eukaryota | 3-ketoacyl-CoA synthase                        |           | Eranthis hyemalis (Winter aconite).                                                   | ABS18382.1                |                | A7L830 [T]              |  |
| Eukaryota | Putative uncharacterized protein               |           | Vitis vinifera (Grape).                                                               | CAN68997.1                |                | A5AGM3                  |  |
| Eukaryota | Predicted protein                              |           | Populus trichocarpa (Western balsam poplar) (Populus balsamifera subsp. trichocarpa). | EEE87748.1                | XP_002313793.1 | B9HRM7                  |  |

|           |                           |  |                                                                                       |            |                |        |  |
|-----------|---------------------------|--|---------------------------------------------------------------------------------------|------------|----------------|--------|--|
| Eukaryota | Predicted protein         |  | Populus trichocarpa (Western balsam poplar) (Populus balsamifera subsp. trichocarpa). | EEE85942.1 | XP_002305431.1 | B9H0R8 |  |
| Eukaryota | Acyltransferase, putative |  | Ricinus communis (Castor bean).                                                       | EEF50878.1 | XP_002509491.1 | B9RBF7 |  |
| Eukaryota | Predicted protein         |  | Physcomitrella patens subsp. patens.                                                  | EDQ72629.1 | XP_001762506.1 | A9S896 |  |
| Eukaryota | Predicted protein         |  | Physcomitrella patens subsp. patens.                                                  | EDQ81858.1 | XP_001753229.1 | A9RGK9 |  |
| Eukaryota | Predicted protein         |  | Physcomitrella patens subsp. patens.                                                  | EDQ82178.1 | XP_001753137.1 | A9RG41 |  |
| Eukaryota | Predicted protein         |  | Physcomitrella patens subsp. patens.                                                  | EDQ76304.1 | XP_001758798.1 | A9RXN9 |  |
| Eukaryota | Predicted protein         |  | Physcomitrella patens subsp. patens.                                                  | EDQ77625.1 | XP_001757568.1 | A9RTPO |  |
| Eukaryota | hypothetical protein      |  | Selaginella moellendorffii                                                            | EFJ35502.1 | XP_002963631.1 |        |  |
| Eukaryota | hypothetical protein      |  | Selaginella moellendorffii                                                            | EFJ24239.1 | XP_002974719.1 |        |  |
| Eukaryota | FAE1                      |  | Marchantia polymorpha (Liverwort).                                                    | AAP74371.1 |                | Q7XZE7 |  |

Subfamily 2C.

| SubC      |                                                 |           |                                                                                       |                                                |                |                      |     |
|-----------|-------------------------------------------------|-----------|---------------------------------------------------------------------------------------|------------------------------------------------|----------------|----------------------|-----|
| Type      | Sequence                                        | EC Number | Organism                                                                              | GenBank ID                                     | RefSeq         | UniProt              | PDB |
| Eukaryota | Acyltransferase, putative                       |           | Ricinus communis (Castor bean).                                                       | EEF45199.1                                     | XP_002517036.1 | B9RTG7               |     |
| Eukaryota | Beta-ketoacyl-coa synthase family protein       |           | Populus trichocarpa (Western balsam poplar) (Populus balsamifera subsp. trichocarpa). | EEE71322.1                                     | XP_002332626.1 | B9NBJ1               |     |
| Eukaryota | Beta-ketoacyl-coa synthase family protein       |           | Populus trichocarpa (Western balsam poplar) (Populus balsamifera subsp. trichocarpa). | EEE71320.1                                     | XP_002332624.1 | B9NBI9               |     |
| Eukaryota | Putative uncharacterized protein                |           | Populus trichocarpa (Western balsam poplar) (Populus balsamifera subsp. trichocarpa). | ABK94954.1                                     |                | A9PF01 [T]           |     |
| Eukaryota | Beta-ketoacyl-coa synthase family protein       |           | Populus trichocarpa (Western balsam poplar) (Populus balsamifera subsp. trichocarpa). | EEE77823.1                                     | XP_002333986.1 | B9NFF1               |     |
| Eukaryota | Putative fatty acid elongase                    |           | Tropaeolum majus (Common nasturtium).                                                 | ABD77097.1                                     |                | Q1ZZJ8               |     |
| Eukaryota | Putative fatty acid elongase                    |           | Tropaeolum majus (Common nasturtium).                                                 | AAL99199.1                                     |                | Q8RXA6 [T]           |     |
| Eukaryota | Beta-ketoacyl-CoA synthase                      |           | Simmondsia chinensis (Jojoba) (Buxus chinensis).                                      | AAC49186.1                                     |                | Q41301 [T]           |     |
| Eukaryota | Fatty acid elongase 1-like protein              |           | Limnanthes douglasii (Douglas's meadowfoam).                                          | AAG28600.1                                     |                | Q9FV67 [T]           |     |
| Eukaryota | Very long-chain fatty acid condensing enzyme 19 | 2.3.1.-   | Arabidopsis thaliana (Mouse-ear cress).                                               | AAK59535.1, AAL11613.1, AAN12994.1, BAB11304.1 | NP_199189.1    | Q9FG87 [T], Q9FG87.1 |     |
| Eukaryota | Very long-chain fatty acid condensing enzyme 17 | 2.3.1.-   | Arabidopsis thaliana (Mouse-ear cress).                                               | AAC16740.1, AAL67132.1, AAU95453.1, BAD95022.1 | NP_171918.1    | Q5XEP9 [T], Q5XEP9.2 |     |
| Eukaryota | Putative uncharacterized protein                | 2.3.1.-   | Arabidopsis lyrata subsp. lyrata.                                                     | EFH68460.1                                     | XP_002892201.1 | D7KDC3               |     |



|           |                                                 |  |                                                                                          |                                                         |                |            |  |
|-----------|-------------------------------------------------|--|------------------------------------------------------------------------------------------|---------------------------------------------------------|----------------|------------|--|
| Eukaryota | Beta-ketoacyl-CoA synthase                      |  | Helianthus annuus (Common sunflower).                                                    | ACC60973.1                                              |                | C9VYH7 [T] |  |
| Eukaryota | PREDICTED: hypothetical protein                 |  | Vitis vinifera                                                                           |                                                         | XP_002283935.1 |            |  |
| Eukaryota | Beta-ketoacyl-CoA synthase                      |  | Gossypium hirsutum (Upland cotton)<br>(Gossypium mexicanum).                             | ABV60087.1                                              |                | A9XUG6 [T] |  |
| Eukaryota | Acyltransferase, putative                       |  | Ricinus communis (Castor bean).                                                          | EEF45198.1                                              | XP_002517035.1 | B9RTG6     |  |
| Eukaryota | Beta-ketoacyl-coa synthase family protein       |  | Populus trichocarpa (Western balsam poplar)<br>(Populus balsamifera subsp. trichocarpa). | EEE89929.1                                              | XP_002312562.1 | B9HKC7     |  |
| Eukaryota | Beta-ketoacyl-coa synthase family protein       |  | Populus trichocarpa (Western balsam poplar)<br>(Populus balsamifera subsp. trichocarpa). | EEF00831.1                                              | XP_002314660.1 | B9HUP8     |  |
| Eukaryota | Putative uncharacterized protein                |  | Populus trichocarpa x Populus deltoides.                                                 | ABK96299.1                                              |                | A9PIU6 [T] |  |
| Eukaryota | Putative uncharacterized protein<br>Sb09g029260 |  | Sorghum bicolor (Sorghum) (Sorghum vulgare).                                             | EES19987.1                                              | XP_002441557.1 | C5YW23     |  |
| Eukaryota | Putative uncharacterized protein                |  | Oryza sativa subsp. indica (Rice).                                                       | EAY99126.1                                              |                | A2Y7R6     |  |
| Eukaryota | cDNA clone:J023067B12, full insert sequence     |  | Oryza sativa subsp. japonica (Rice).                                                     | AAT69586.1,<br>BAF18305.1,<br>BAG92126.1,<br>EEE64780.1 | NP_001056391.1 | Q6F365 [T] |  |
| Eukaryota | Putative uncharacterized protein                |  | Oryza sativa subsp. japonica (Rice).                                                     | EAZ22163.1                                              |                | A3A4C4     |  |
| Eukaryota | Putative uncharacterized protein                |  | Oryza sativa subsp. indica (Rice).                                                       | EAY84941.1                                              |                | A2X281     |  |

|           |                                                 |                      |                                              |                                                         |                |                         |
|-----------|-------------------------------------------------|----------------------|----------------------------------------------|---------------------------------------------------------|----------------|-------------------------|
| Eukaryota | cDNA clone:J013127I02, full insert sequence     |                      | Oryza sativa subsp. japonica (Rice).         | BAD16019.1,<br>BAD38439.1,<br>BAF08164.1,<br>BAG90658.1 | NP_001046250.1 | Q6Z6C7 [T]              |
| Eukaryota | Putative uncharacterized protein Sb04g007190    |                      | Sorghum bicolor (Sorghum) (Sorghum vulgare). | EES06493.1                                              | XP_002453517.1 | C5XXY2                  |
| Eukaryota | Fatty acid elongase                             |                      | Zea mays (Maize).                            | ACG43464.1                                              | NP_001151591.1 | B6U281 [T]              |
| Eukaryota | Putative uncharacterized protein                |                      | Zea mays (Maize).                            | ACR36808.1                                              |                | C4J6K8 [T]              |
| Eukaryota | Putative uncharacterized protein                |                      | Oryza sativa subsp. japonica (Rice).         | BAD32939.1,<br>BAF19910.1,<br>EAZ37545.1                | NP_001057996.1 | Q69X62                  |
| Eukaryota | Putative uncharacterized protein                |                      | Oryza sativa subsp. indica (Rice).           | EAZ01557.1                                              |                | A2YEP6                  |
| Eukaryota | Putative uncharacterized protein Sb10g023290    |                      | Sorghum bicolor (Sorghum) (Sorghum vulgare). | EER88601.1                                              | XP_002437234.1 | C5Z5K2                  |
| Eukaryota | Fatty acid elongase                             |                      | Zea mays (Maize).                            | ACG36525.1                                              |                | B6THE2 [T]              |
| Eukaryota | Putative fatty acid elongase                    |                      | Zea mays (Maize).                            | CAC01441.1                                              | NP_001105135.1 | Q9FXZ8 [T]              |
| Eukaryota | Very long-chain fatty acid condensing enzyme 11 |                      | Arabidopsis thaliana (Mouse-ear cress).      | AAB95298.1,<br>AAO41904.1,<br>AAO64112.1                | NP_180232.1    | O48780 [P],<br>O48780.1 |
| Eukaryota | Putative uncharacterized protein                | 2.3.1.-<br>2.3.1.119 | Arabidopsis lyrata subsp. lyrata.            | EFH55253.1                                              | XP_002878994.1 | D7LE90                  |
| Eukaryota | Beta-ketoacyl-CoA synthase                      |                      | Helianthus annuus (Common sunflower).        | ACC95444.1                                              |                | C6ES40 [T]              |

|           |                                                                        |  |                                                                                       |            |                |            |  |
|-----------|------------------------------------------------------------------------|--|---------------------------------------------------------------------------------------|------------|----------------|------------|--|
| Eukaryota | Beta-ketoacyl-coa synthase family protein                              |  | Populus trichocarpa (Western balsam poplar) (Populus balsamifera subsp. trichocarpa). | EEF02841.1 | XP_002324276.1 | B9IKT4     |  |
| Eukaryota | Beta-ketoacyl-coa synthase family protein                              |  | Populus trichocarpa (Western balsam poplar) (Populus balsamifera subsp. trichocarpa). | EEE92165.1 | XP_002308642.1 | B9H9R8     |  |
| Eukaryota | PREDICTED: hypothetical protein                                        |  | Vitis vinifera                                                                        |            | XP_002284751.1 |            |  |
| Eukaryota | Putative uncharacterized protein                                       |  | Vitis vinifera (Grape).                                                               | CAN67313.1 | XP_002284986.1 | A5AYN9     |  |
| Eukaryota | Whole genome shotgun sequence of line PN40024, scaffold_16.assembly12x |  | Vitis vinifera (Grape).                                                               | CBI28145.3 |                | D7TBW0     |  |
| Eukaryota | CM0216.300.nc protein                                                  |  | Lotus japonicus.                                                                      | BAF98214.1 |                | B0BLH8     |  |
| Eukaryota | Putative uncharacterized protein                                       |  | Medicago truncatula (Barrel medic).                                                   | ACJ85761.1 |                | B7FLX8 [T] |  |
| Eukaryota | Acyltransferase, putative                                              |  | Ricinus communis (Castor bean).                                                       | EEF33033.1 | XP_002529366.1 | B9STP7     |  |
| Eukaryota | Fatty acid elongase                                                    |  | Pistacia chinensis.                                                                   | ACY78677.1 |                | D1LFI9 [T] |  |

Subfamily 2D.

| Type      | Sequence                                                             | EC Number | SubD<br>Organism                            | GenBank ID                                                                            | RefSeq         | UniProt                   | PDB |
|-----------|----------------------------------------------------------------------|-----------|---------------------------------------------|---------------------------------------------------------------------------------------|----------------|---------------------------|-----|
| Eukaryota | Putative uncharacterized protein                                     |           | <i>Picea sitchensis</i> (Sitka spruce).     | ADE77445.1                                                                            |                | D5AD26 [T]                |     |
| Eukaryota | Putative uncharacterized protein                                     |           | <i>Picea sitchensis</i> (Sitka spruce).     | ABK24632.1                                                                            |                | A9NVH1 [T]                |     |
| Eukaryota | Putative FIDDLEHEAD very long chain fatty acid condensing enzyme FDH |           | <i>Hordeum vulgare</i> (Barley).            | ABG35745.1,<br>ABV22580.1,<br>ABV22581.1,<br>ABV22587.1                               |                | A7YA55 [T],<br>A9L9S2 [T] |     |
| Eukaryota | Similar to Fiddlehead protein                                        |           | <i>Oryza sativa</i> subsp. japonica (Rice). | ABF94315.1,<br>BAF11084.1,<br>BAG87571.1,<br>BAG87863.1,<br>BAG94008.1,<br>BAG99590.1 | NP_001049170.1 | Q10QW1 [T]                |     |
| Eukaryota | Putative uncharacterized protein                                     |           | <i>Oryza sativa</i> subsp. indica (Rice).   | EAY88792.1                                                                            |                | A2XD82                    |     |
| Eukaryota | Putative fiddlehead-like protein                                     |           | <i>Oryza sativa</i> subsp. japonica (Rice). | AAN65442.1                                                                            |                | Q8H7L2                    |     |
| Eukaryota | Fiddlehead, putative, expressed                                      |           | <i>Oryza sativa</i> subsp. japonica (Rice). | ABF94313.1                                                                            |                | Q10QW0                    |     |
| Eukaryota | Putative uncharacterized protein                                     |           | <i>Oryza sativa</i> subsp. japonica (Rice). | EEE58439.1                                                                            |                | B9F5I5                    |     |
| Eukaryota | Similar to Fiddlehead protein                                        |           | <i>Oryza sativa</i> subsp. japonica (Rice). | ABF94314.1,<br>BAG87572.1,<br>BAG87864.1,<br>BAG94009.1,<br>BAG99591.1                |                | Q10QV9 [T]                |     |
| Eukaryota | Fiddlehead, putative, expressed                                      |           | <i>Oryza sativa</i> subsp. japonica (Rice). | ABF94316.1                                                                            |                | Q10QV8                    |     |

|           |                                                                          |         |                                                 |                                                                                                                                                                                                                                             |                |                         |  |
|-----------|--------------------------------------------------------------------------|---------|-------------------------------------------------|---------------------------------------------------------------------------------------------------------------------------------------------------------------------------------------------------------------------------------------------|----------------|-------------------------|--|
| Eukaryota | Fiddlehead-like protein                                                  |         | Zea mays (Maize).                               | ACG35345.1                                                                                                                                                                                                                                  | NP_001149405.1 | B6TE12 [T]              |  |
| Eukaryota | Putative uncharacterized protein                                         |         | Zea mays (Maize).                               | ACN25771.1                                                                                                                                                                                                                                  |                | COHFG8 [T]              |  |
| Eukaryota | Putative uncharacterized protein<br>Sb01g045150                          |         | Sorghum bicolor (Sorghum)<br>(Sorghum vulgare). | EER95395.1                                                                                                                                                                                                                                  | XP_002468397.1 | C5WVS4                  |  |
| Eukaryota | PREDICTED: hypothetical protein isoform 1                                |         | Vitis vinifera                                  |                                                                                                                                                                                                                                             | XP_002282234.1 |                         |  |
| Eukaryota | PREDICTED: hypothetical protein isoform 2                                |         | Vitis vinifera                                  |                                                                                                                                                                                                                                             | XP_002282282.1 |                         |  |
| Eukaryota | Whole genome shotgun sequence of line<br>PN40024, scaffold_8.assembly12x |         | Vitis vinifera (Grape).                         | CBI20747.3                                                                                                                                                                                                                                  |                | D7STZ8                  |  |
| Eukaryota | Predicted protein                                                        |         | Arabidopsis lyrata subsp. lyrata.               | EFH57030.1                                                                                                                                                                                                                                  | XP_002880771.1 | D7LCV5                  |  |
| Eukaryota | Protein FIDDLEHEAD                                                       | 2.3.1.- | Arabidopsis thaliana (Mouse-ear<br>cress).      | AAC14526.1,<br>AAF73973.1,<br>AAF73974.1,<br>AAF73975.1,<br>AAF73976.1,<br>AAF73977.1,<br>AAF73978.1,<br>AAF73979.1,<br>AAF73980.1,<br>AAF73981.1,<br>AAG60062.1,<br>AAK62618.1,<br>AAN31115.1,<br>AAN86193.1,<br>BAD94049.1,<br>CAA09311.1 | NP_180193.1    | Q570B4 [P],<br>Q570B4.2 |  |

|           |                                                 |         |                                                                                                              |                                          |                |                         |  |
|-----------|-------------------------------------------------|---------|--------------------------------------------------------------------------------------------------------------|------------------------------------------|----------------|-------------------------|--|
| Eukaryota | Fiddlehead-like protein                         |         | <i>Pisum sativum</i> (Garden pea).                                                                           | ABU75309.2                               |                | A7X6P9 [T]              |  |
| Eukaryota | Putative beta-ketoacyl-CoA synthase             |         | <i>Antirrhinum majus</i> (Garden snapdragon).                                                                | CAC84082.1                               |                | Q8S2R3                  |  |
| Eukaryota | Acyltransferase, putative                       |         | <i>Ricinus communis</i> (Castor bean).                                                                       | EEF46169.1                               | XP_002516167.1 | B9RQZ8                  |  |
| Eukaryota | Fiddlehead-like protein                         |         | <i>Tropaeolum majus</i> (Common nasturtium).                                                                 | AAO47729.1,<br>AAP14903.1                |                | Q84K36 [T]              |  |
| Eukaryota | Beta-ketoacyl-coa synthase family protein       |         | <i>Populus trichocarpa</i> (Western balsam poplar) ( <i>Populus balsamifera</i> subsp. <i>trichocarpa</i> ). | EEE92974.1                               | XP_002309451.1 | B9HCP2                  |  |
| Eukaryota | Fiddlehead-like protein                         |         | <i>Gossypium hirsutum</i> (Upland cotton) ( <i>Gossypium mexicanum</i> ).                                    | AAL67993.1                               |                | Q8VWP9 [T]              |  |
| Eukaryota | Very long-chain fatty acid condensing enzyme 15 | 2.3.1.- | <i>Arabidopsis thaliana</i> (Mouse-ear cress).                                                               | AAM61287.1,<br>ABE66011.1,<br>CAB41336.1 | NP_190784.1    | Q9SUY9 [T],<br>Q9SUY9.1 |  |
| Eukaryota | Very long-chain fatty acid condensing enzyme 15 | 2.3.1.- | <i>Arabidopsis thaliana</i> (Mouse-ear cress).                                                               | AAM61287.1,<br>ABE66011.1,<br>CAB41336.1 | NP_190784.1    | Q9SUY9 [T],<br>Q9SUY9.1 |  |
| Eukaryota | Putative uncharacterized protein                |         | <i>Arabidopsis thaliana</i> (Mouse-ear cress).                                                               | ABK28598.1                               |                | A0MF23 [T]              |  |
| Eukaryota | Beta-ketoacyl-CoA synthase family protein       |         | <i>Arabidopsis lyrata</i> subsp. <i>lyrata</i> .                                                             | EFH54104.1                               | XP_002877845.1 | D7LU31                  |  |
| Eukaryota | Acyltransferase, putative                       |         | <i>Ricinus communis</i> (Castor bean).                                                                       | EEF32005.1                               | XP_002530372.1 | B9SWK3                  |  |
| Eukaryota | PREDICTED: hypothetical protein                 |         | <i>Vitis vinifera</i>                                                                                        |                                          | XP_002273798.1 |                         |  |

Subfamily 2E.

SubE

| Type      | Sequence                                                 | EC Number | Organism                                     | GenBank ID                                              | RefSeq         | UniProt                 | PDB |
|-----------|----------------------------------------------------------|-----------|----------------------------------------------|---------------------------------------------------------|----------------|-------------------------|-----|
| Eukaryota | Predicted protein                                        |           | Physcomitrella patens subsp. patens.         | EDQ76154.1                                              | XP_001759085.1 | A9RY07                  |     |
| Eukaryota | Predicted protein                                        |           | Physcomitrella patens subsp. patens.         | EDQ65326.1                                              | XP_001769764.1 | A9STT5                  |     |
| Eukaryota | Putative uncharacterized protein                         |           | Arabidopsis lyrata subsp. lyrata.            | EFH56520.1                                              | XP_002880261.1 | D7LF81                  |     |
| Eukaryota | 3-ketoacyl-coA synthase 13 KCS13                         |           | Arabidopsis halleri subsp. halleri.          | CAZ68133.1                                              |                | D4HU18                  |     |
| Eukaryota | Very long-chain fatty acid condensing enzyme 14          | 2.3.1.-   | Arabidopsis thaliana (Mouse-ear cress).      | AAF02814.1                                              | NP_187639.1    | Q9SS39 [T],<br>Q9SS39.1 |     |
| Eukaryota | Protein HIGH CARBON DIOXIDE                              | 2.3.1.-   | Arabidopsis thaliana (Mouse-ear cress).      | AAC69929.1,<br>AAG24644.1,<br>AAG24645.1                | NP_182195.1    | Q9ZUZ0 [T],<br>Q9ZUZ0.1 |     |
| Eukaryota | Senescence-associated protein 15                         |           | Hemerocallis sp. (Daylily).                  | AAC34858.1                                              |                | O81658 [T]              |     |
| Eukaryota | Putative uncharacterized protein<br>Sb01g041190          |           | Sorghum bicolor (Sorghum) (Sorghum vulgare). | EER92561.1                                              | XP_002465563.1 | C5WQZ2                  |     |
| Eukaryota | Senescence-associated protein 15, putative,<br>expressed |           | Oryza sativa subsp. japonica (Rice).         | ABF94942.1,<br>BAF11454.1,<br>EAY89235.1,<br>EAZ26253.1 | NP_001049540.1 | A2XEH5,<br>Q10P61       |     |
| Eukaryota | Putative uncharacterized protein<br>Sb01g025820          |           | Sorghum bicolor (Sorghum) (Sorghum vulgare). | EER91722.1                                              | XP_002464724.1 | C5WZN0                  |     |
| Eukaryota | Putative uncharacterized protein                         |           | Oryza sativa subsp. japonica (Rice).         | EEE50594.1                                              |                | B9G7K9                  |     |
| Eukaryota | Putative senescence-associated protein 15                |           | Oryza sativa (Rice).                         | AAK95678.1,<br>ABB46794.2                               |                | Q33AY1,<br>Q94GT5       |     |
| Eukaryota | Os10g0158100 protein                                     |           | Oryza sativa subsp. japonica (Rice).         | BAF26110.2                                              | NP_001064196.2 | Q0IYV5                  |     |

|           |                                                                        |                      |                                                                                                                 |                                                                        |                |                         |  |
|-----------|------------------------------------------------------------------------|----------------------|-----------------------------------------------------------------------------------------------------------------|------------------------------------------------------------------------|----------------|-------------------------|--|
| Eukaryota | Putative uncharacterized protein                                       |                      | <i>Oryza sativa</i> subsp. <i>indica</i> (Rice).                                                                | EEC66585.1                                                             |                | B8BFS6                  |  |
| Eukaryota | Chalcone and stilbene synthases, N-terminal                            |                      | <i>Medicago truncatula</i> (Barrel medic).                                                                      | ABD32702.1                                                             |                | Q2HTC9                  |  |
| Eukaryota | Fatty acid elongase 3-ketoacyl-CoA synthase                            |                      | <i>Brassica napus</i> (Rape).                                                                                   | AAT65207.1                                                             |                | Q6DUV5                  |  |
| Eukaryota | Fatty acid elongase 3-ketoacyl-CoA synthase                            |                      | <i>Brassica napus</i> (Rape).                                                                                   | AAT65206.1                                                             |                | Q6DUV6 [T]              |  |
| Eukaryota | 3-ketoacyl-CoA synthase 1                                              |                      | <i>Arabidopsis lyrata</i> subsp. <i>lyrata</i> .                                                                | EFH65642.1                                                             | XP_002889383.1 | D7KQB2                  |  |
| Eukaryota | AT1G01120 protein                                                      |                      | <i>Arabidopsis thaliana</i> (Mouse-ear cress).                                                                  | BAH20305.1                                                             |                | B9DHT8 [T]              |  |
| Eukaryota | Very long-chain fatty acid condensing enzyme 1                         | 2.3.1.-<br>2.3.1.119 | <i>Arabidopsis thaliana</i> (Mouse-ear cress).                                                                  | AAC99312.1,<br>AAF26470.1,<br>AAL66982.1,<br>AAM20218.1,<br>BAD95286.1 | NP_171620.2    | Q9MAM3 [P],<br>Q9MAM3.1 |  |
| Eukaryota | Putative fatty acid elongase 3-ketoacyl-CoA synthase 1                 |                      | <i>Arabidopsis thaliana</i> (Mouse-ear cress).                                                                  | BAE98925.1                                                             |                | Q0WVC3 [T]              |  |
| Eukaryota | Acyltransferase, putative                                              |                      | <i>Ricinus communis</i> (Castor bean).                                                                          | EEF32418.1                                                             | XP_002529975.1 | B9SVF6                  |  |
| Eukaryota | 3-ketoacyl-CoA synthase 10                                             |                      | <i>Gossypium hirsutum</i> (Upland cotton)<br>( <i>Gossypium mexicanum</i> ).                                    | ABX10440.1                                                             |                | A9XU46 [T]              |  |
| Eukaryota | Predicted protein                                                      |                      | <i>Populus trichocarpa</i> (Western balsam poplar)<br>( <i>Populus balsamifera</i> subsp. <i>trichocarpa</i> ). | EEE80709.1                                                             | XP_002301436.1 | B9GRP8                  |  |
| Eukaryota | Putative uncharacterized protein                                       |                      | <i>Vitis vinifera</i> (Grape).                                                                                  | CAN77062.1                                                             |                | A5BMG1                  |  |
| Eukaryota | Whole genome shotgun sequence of line PN40024, scaffold_48.assembly12x |                      | <i>Vitis vinifera</i> (Grape).                                                                                  | CBI38700.3                                                             |                | D7U818                  |  |



|           |                                 |                |                |
|-----------|---------------------------------|----------------|----------------|
| Eukaryota | PREDICTED: hypothetical protein | Vitis vinifera | XP_002264721.1 |
|-----------|---------------------------------|----------------|----------------|

Subfamily 2F.

| Type      | Sequence                                                   | EC Number | Organism                                     | GenBank ID                                                                                           | RefSeq         | UniProt               | PDB |
|-----------|------------------------------------------------------------|-----------|----------------------------------------------|------------------------------------------------------------------------------------------------------|----------------|-----------------------|-----|
| Eukaryota | Putative uncharacterized protein                           |           | Vitis vinifera (Grape).                      | CAN63425.1                                                                                           |                | A5BF22                |     |
| Eukaryota | PREDICTED: hypothetical protein                            |           | Vitis vinifera                               |                                                                                                      | XP_002271250.1 |                       |     |
| Eukaryota | 3-ketoacyl-CoA synthase II                                 |           | Triticum aestivum (Wheat).                   | ABY82172.1                                                                                           |                | B6CEY0 [T]            |     |
| Eukaryota | 3-ketoacyl-CoA synthase I                                  |           | Triticum aestivum (Wheat).                   | ABY82171.2                                                                                           |                | B6CEX9 [T]            |     |
| Eukaryota | Putative very long chain fatty acid condensing enzyme CUT1 |           | Hordeum vulgare (Barley).                    | ABG35744.1                                                                                           |                | A9L9S1 [T]            |     |
| Eukaryota | cDNA clone:J013074H08, full insert sequence                |           | Oryza sativa subsp. japonica (Rice).         | ABF94686.1,<br>BAF11320.1,<br>BAG90041.1,<br>BAG96897.1,<br>BAG97602.1,<br>EAY89070.1,<br>EAZ26093.1 | NP_001049406.1 | A2XE10,<br>Q10PV5 [T] |     |
| Eukaryota | Putative uncharacterized protein Sb01g042600               |           | Sorghum bicolor (Sorghum) (Sorghum vulgare). | EER92628.1                                                                                           | XP_002465630.1 | C5WSP8                |     |
| Eukaryota | Putative uncharacterized protein                           |           | Zea mays (Maize).                            | ACF87925.1,<br>ACN34702.1                                                                            |                | B4G0N2 [T]            |     |
| Eukaryota | Putative uncharacterized protein                           |           | Zea mays (Maize).                            | ACF78737.1                                                                                           | NP_001130497.1 | B4F9E4 [T]            |     |
| Eukaryota | PREDICTED: hypothetical protein                            |           | Vitis vinifera                               |                                                                                                      | XP_002282526.1 |                       |     |

|           |                                                   |         |                                                                                       |                                                                        |                |                         |  |
|-----------|---------------------------------------------------|---------|---------------------------------------------------------------------------------------|------------------------------------------------------------------------|----------------|-------------------------|--|
| Eukaryota | Putative uncharacterized protein                  |         | Arabidopsis lyrata subsp. lyrata.                                                     | EFH64929.1                                                             | XP_002888670.1 | D7KWD3                  |  |
| Eukaryota | Cuticular protein 1                               | 2.3.1.- | Arabidopsis thaliana (Mouse-ear cress).                                               | AAD37122.1,<br>AAG52390.1,<br>AAL50069.1,<br>AAM16230.1,<br>BAD94789.1 | NP_177020.1    | Q9XF43 [T],<br>Q9XF43.1 |  |
| Eukaryota | Very-long-chain fatty acid condensing enzyme CUT1 |         | Arabidopsis thaliana (Mouse-ear cress).                                               | AAM65060.1                                                             |                | Q8LAZ1 [T]              |  |
| Eukaryota | Uncharacterized protein At1g68530.2               |         | Arabidopsis thaliana (Mouse-ear cress).                                               |                                                                        | NP_849861.1    | Q3ECG1                  |  |
| Eukaryota | Putative uncharacterized protein                  |         | Arabidopsis lyrata subsp. lyrata.                                                     | EFH66948.1                                                             | XP_002890689.1 | D7KAI4                  |  |
| Eukaryota | Very long-chain fatty acid condensing enzyme 5    | 2.3.1.- | Arabidopsis thaliana (Mouse-ear cress).                                               | AAG50800.1,<br>AAM67234.1,<br>AAO42223.1                               | NP_173916.1    | Q9C6L5 [T],<br>Q9C6L5.1 |  |
| Eukaryota | CER6                                              |         | Solanum tuberosum (Potato).                                                           | ACF17125.1                                                             |                | B7SSK0                  |  |
| Eukaryota | CER6                                              |         | Solanum lycopersicum (Tomato) (Lycopersicon esculentum).                              | ACT21783.1                                                             |                | C6KH60                  |  |
| Eukaryota | Putative uncharacterized protein                  |         | Vitis vinifera (Grape).                                                               | CAN74750.1                                                             | XP_002283730.1 | A5BLZ4                  |  |
| Eukaryota | 3-ketoacyl-CoA synthase                           |         | Gossypium hirsutum (Upland cotton) (Gossypium mexicanum).                             | ABA01490.1                                                             |                | Q2QCW7 [T]              |  |
| Eukaryota | Predicted protein                                 |         | Populus trichocarpa (Western balsam poplar) (Populus balsamifera subsp. trichocarpa). | EEE88824.1                                                             | XP_002311457.1 | B9HJ26                  |  |
| Eukaryota | Putative uncharacterized protein                  |         | Populus trichocarpa (Western balsam poplar) (Populus balsamifera subsp. trichocarpa). | ABK94727.1,<br>EEF02113.1                                              | XP_002315942.1 | A9PEC4 [T]              |  |

Subfamily 2G.

| Type      | Sequence                                                               | EC Number | Organism                                                                                                     | GenBank ID             | RefSeq         | UniProt              | PDB |
|-----------|------------------------------------------------------------------------|-----------|--------------------------------------------------------------------------------------------------------------|------------------------|----------------|----------------------|-----|
| Eukaryota | Putative uncharacterized protein Sb02g030230                           |           | Sorghum bicolor (Sorghum) ( <i>Sorghum vulgare</i> ).                                                        | EER97063.1             | XP_002460542.1 | C5X618               |     |
| Eukaryota | Acyltransferase                                                        |           | <i>Zea mays</i> (Maize).                                                                                     | ACG30367.1             | NP_001148270.1 | B6SZT4 [T]           |     |
| Eukaryota | Long-chain fatty acid condensing enzyme                                |           | <i>Oryza brachyantha</i> .                                                                                   | ABG73470.1             |                | A6MCZ1               |     |
| Eukaryota | Putative very-long-chain fatty acid condensing enzyme                  |           | <i>Oryza sativa</i> subsp. japonica (Rice).                                                                  | BAD46681.1             |                | Q650T6               |     |
| Eukaryota | Putative very-long-chain fatty acid condensing enzyme                  |           | <i>Oryza sativa</i> subsp. japonica (Rice).                                                                  | BAD46682.1, EAZ45400.1 |                | Q650T5               |     |
| Eukaryota | Very long-chain fatty acid condensing enzyme 20                        | 2.3.1.-   | <i>Arabidopsis thaliana</i> (Mouse-ear cress).                                                               | BAB10089.1             | NP_199718.1    | Q9FH27 [T], Q9FH27.1 |     |
| Eukaryota | Beta-ketoacyl-CoA synthase family protein                              |           | <i>Arabidopsis lyrata</i> subsp. lyrata.                                                                     | EFH41960.1             | XP_002865701.1 | D7MN62               |     |
| Eukaryota | Whole genome shotgun sequence of line PN40024, scaffold_42.assembly12x |           | <i>Vitis vinifera</i> (Grape).                                                                               | CBI29070.3             |                | D7TEZ7               |     |
| Eukaryota | Acyltransferase, putative                                              |           | <i>Ricinus communis</i> (Castor bean).                                                                       | EEF45554.1             | XP_002516940.1 | B9RT71               |     |
| Eukaryota | Beta-ketoacyl-coa synthase family protein                              |           | <i>Populus trichocarpa</i> (Western balsam poplar) ( <i>Populus balsamifera</i> subsp. <i>trichocarpa</i> ). | EEE95431.1             | XP_002319508.1 | B9I7H3               |     |
| Eukaryota | Beta-ketoacyl-CoA synthase family protein                              |           | <i>Arabidopsis lyrata</i> subsp. lyrata.                                                                     | EFH65082.1             | XP_002888823.1 | D7KYS2               |     |
| Eukaryota | Very long-chain fatty acid condensing enzyme 7                         | 2.3.1.-   | <i>Arabidopsis thaliana</i> (Mouse-ear cress).                                                               | AAG51695.1, AAT71956.1 | NP_177272.1    | Q9C992 [T], Q9C992.1 |     |

|           |                                                                        |  |                                                                                       |            |                |        |  |
|-----------|------------------------------------------------------------------------|--|---------------------------------------------------------------------------------------|------------|----------------|--------|--|
| Eukaryota | Beta-ketoacyl-coa synthase family protein                              |  | Populus trichocarpa (Western balsam poplar) (Populus balsamifera subsp. trichocarpa). | EEE82976.1 | XP_002298171.1 | B9GEW1 |  |
| Eukaryota | Putative uncharacterized protein                                       |  | Vitis vinifera (Grape).                                                               | CAN66110.1 |                | A5BX65 |  |
| Eukaryota | Acyltransferase, putative                                              |  | Ricinus communis (Castor bean).                                                       | EEF33117.1 | XP_002529285.1 | B9STG6 |  |
| Eukaryota | PREDICTED: hypothetical protein                                        |  | Vitis vinifera                                                                        |            | XP_002270917.1 |        |  |
| Eukaryota | Whole genome shotgun sequence of line PN40024, scaffold_22.assembly12x |  | Vitis vinifera (Grape).                                                               | CBI24529.3 |                | D7T239 |  |
| Eukaryota | PREDICTED: hypothetical protein                                        |  | Vitis vinifera                                                                        |            | XP_002267475.1 |        |  |
| Eukaryota | Whole genome shotgun sequence of line PN40024, scaffold_22.assembly12x |  | Vitis vinifera (Grape).                                                               | CBI24530.3 | XP_002267424.1 | D7T240 |  |
| Eukaryota | Putative uncharacterized protein                                       |  | Vitis vinifera (Grape).                                                               | CAN79857.1 |                | A5CAA5 |  |
| Eukaryota | Predicted protein                                                      |  | Populus trichocarpa (Western balsam poplar) (Populus balsamifera subsp. trichocarpa). | EEF05987.1 | XP_002321860.1 | B9ICY9 |  |
| Eukaryota | Acyltransferase, putative                                              |  | Ricinus communis (Castor bean).                                                       | EEF51488.1 | XP_002510886.1 | B9R9L1 |  |
| Eukaryota | Acyltransferase, putative                                              |  | Ricinus communis (Castor bean).                                                       | EEF51487.1 | XP_002510885.1 | B9R9L0 |  |

Subfamily 2H.

| Type      | Sequence                                                      | EC Number | Organism                                     | GenBank ID                                              | RefSeq         | UniProt    | PDB |
|-----------|---------------------------------------------------------------|-----------|----------------------------------------------|---------------------------------------------------------|----------------|------------|-----|
| Eukaryota | Putative uncharacterized protein<br>Sb10g009490               |           | Sorghum bicolor (Sorghum) (Sorghum vulgare). | EER89567.1                                              | XP_002438200.1 | C5Z837     |     |
| Eukaryota | Putative uncharacterized protein<br>Sb10g009450               |           | Sorghum bicolor (Sorghum) (Sorghum vulgare). | EER89562.1                                              | XP_002438195.1 | C5Z829     |     |
| Eukaryota | Putative very-long-chain fatty acid<br>condensing enzyme CUT1 |           | Oryza sativa subsp. japonica (Rice).         | BAD54091.1,<br>BAD54353.1,<br>BAF19245.2,<br>EAZ36552.1 | NP_001057331.2 | Q5Z6R6     |     |
| Eukaryota | Putative very long chain fatty acid<br>condensing enzyme CUT1 |           | Hordeum vulgare (Barley).                    | ABF51010.1                                              |                | A9L9N2 [T] |     |
| Eukaryota | Putative uncharacterized protein<br>Sb10g009410               |           | Sorghum bicolor (Sorghum) (Sorghum vulgare). | EER89559.1                                              | XP_002438192.1 | C5Z823     |     |
| Eukaryota | Putative very-long-chain fatty acid<br>condensing enzyme CUT1 |           | Oryza sativa subsp. japonica (Rice).         | BAD54186.1,<br>BAF19243.1,<br>EAZ36546.1                | NP_001057329.1 | Q5Z7C8     |     |
| Eukaryota | Putative uncharacterized protein                              |           | Oryza sativa subsp. indica (Rice).           | EEC80356.1                                              |                | B8B0C3     |     |
| Eukaryota | Putative uncharacterized protein                              |           | Oryza sativa subsp. indica (Rice).           | EEC80357.1                                              |                | B8B0C4     |     |
| Eukaryota | Putative very-long-chain fatty acid<br>condensing enzyme CUT1 |           | Oryza sativa subsp. japonica (Rice).         | BAD54084.1,<br>BAD54346.1,<br>BAF19244.1                | NP_001057330.1 | Q5Z6S3     |     |
| Eukaryota | Putative uncharacterized protein                              |           | Oryza sativa subsp. japonica (Rice).         | EEE65482.1                                              |                | B9FSM1     |     |
| Eukaryota | Putative very-long-chain fatty acid<br>condensing enzyme CUT1 |           | Oryza sativa subsp. japonica (Rice).         | BAD54167.1,<br>BAF19241.1,<br>EAZ36543.1                | NP_001057327.1 | Q5Z7E7     |     |
| Eukaryota | Putative uncharacterized protein                              |           | Oryza sativa subsp. indica (Rice).           | EAZ00421.1                                              |                | A2YBG0     |     |

|           |                                               |  |                                                              |                                                                        |                |            |  |
|-----------|-----------------------------------------------|--|--------------------------------------------------------------|------------------------------------------------------------------------|----------------|------------|--|
| Eukaryota | Putative uncharacterized protein              |  | <i>Oryza sativa</i> subsp. <i>indica</i> (Rice).             | EAY87409.1                                                             |                | A2X999     |  |
| Eukaryota | cDNA, clone: J065136G23, full insert sequence |  | <i>Oryza sativa</i> subsp. <i>japonica</i> (Rice).           | BAD15940.1,<br>BAD16133.1,<br>BAF09937.2,<br>BAH00996.1,<br>EAZ24509.1 | NP_001048023.2 | Q6Z2K7 [T] |  |
| Eukaryota | Putative uncharacterized protein              |  | <i>Oryza sativa</i> subsp. <i>indica</i> (Rice).             | EAY87408.1                                                             |                | A2X998     |  |
| Eukaryota | Putative uncharacterized protein              |  | <i>Zea mays</i> (Maize).                                     | ACL53765.1,<br>ACN28136.1                                              | NP_001146356.1 | B8A0R6 [T] |  |
| Eukaryota | G14a                                          |  | <i>Zea mays</i> (Maize).                                     | ACO72623.1                                                             |                | D2DWN9     |  |
| Eukaryota | G14a                                          |  | <i>Zea mays</i> (Maize).                                     | ACO72625.1                                                             |                | D2DWP1     |  |
| Eukaryota | Truncated g14a                                |  | <i>Zea mays</i> (Maize).                                     | ACO72627.1                                                             |                | D2DWP3     |  |
| Eukaryota | Putative uncharacterized protein              |  | <i>Zea mays</i> (Maize).                                     | ACF78938.1,<br>ACF84285.1                                              | NP_001130638.1 | B4F9Z5 [T] |  |
| Eukaryota | G14a                                          |  | <i>Zea mays</i> (Maize).                                     | ACO72624.1                                                             |                | D2DWP0     |  |
| Eukaryota | Putative uncharacterized protein Sb10g009460  |  | <i>Sorghum bicolor</i> (Sorghum) ( <i>Sorghum vulgare</i> ). | EER88189.1                                                             | XP_002436822.1 | C5Z830     |  |
| Eukaryota | Putative uncharacterized protein Sb10g009462  |  | <i>Sorghum bicolor</i> (Sorghum) ( <i>Sorghum vulgare</i> ). | EER88190.1                                                             | XP_002436823.1 | C5Z831     |  |
| Eukaryota | Putative uncharacterized protein Sb06g001920  |  | <i>Sorghum bicolor</i> (Sorghum) ( <i>Sorghum vulgare</i> ). | EES10442.1                                                             | XP_002446114.1 | C5YCC2     |  |

|           |                                                            |  |                                                              |            |                |            |
|-----------|------------------------------------------------------------|--|--------------------------------------------------------------|------------|----------------|------------|
| Eukaryota | OSJNBb0050003.6 protein                                    |  | <i>Oryza sativa</i> subsp. japonica (Rice).                  | CAE01716.2 |                | Q7XT16     |
| Eukaryota | cDNA clone:002-183-G08, full insert sequence               |  | <i>Oryza sativa</i> subsp. japonica (Rice).                  | BAG99811.1 |                | B7F5B4 [T] |
| Eukaryota | Putative uncharacterized protein                           |  | <i>Oryza sativa</i> subsp. japonica (Rice).                  | EEE60402.1 |                | B9FD38     |
| Eukaryota | Putative uncharacterized protein                           |  | <i>Zea mays</i> (Maize).                                     | ACF84501.1 | NP_001140738.1 | B4FQV8 [T] |
| Eukaryota | Putative uncharacterized protein Sb03g023131               |  | <i>Sorghum bicolor</i> (Sorghum) ( <i>Sorghum vulgare</i> ). | EES03073.1 | XP_002457953.1 | C5XM86     |
| Eukaryota | Os01g0529800 protein                                       |  | <i>Oryza sativa</i> subsp. japonica (Rice).                  | BAF05149.1 | NP_001043235.1 | Q0JM79     |
| Eukaryota | Putative uncharacterized protein                           |  | <i>Oryza sativa</i> subsp. indica (Rice).                    | EAY74376.1 |                | A2WQY0     |
| Eukaryota | Putative very-long-chain fatty acid condensing enzyme CUT1 |  | <i>Oryza sativa</i> subsp. japonica (Rice).                  | BAB91850.1 |                | Q8LQT7     |
| Eukaryota | Putative uncharacterized protein Sb03g022990               |  | <i>Sorghum bicolor</i> (Sorghum) ( <i>Sorghum vulgare</i> ). | EES00849.1 | XP_002455729.1 | C5XM80     |
| Eukaryota | 3-ketoacyl-CoA synthase                                    |  | <i>Zea mays</i> (Maize).                                     | ACG35539.1 | NP_001149469.1 | B6TEK6 [T] |



Subfamily 2I.

| Type      | Sequence                                             | EC Number | Organism                                     | GenBank ID                                                             | RefSeq         | UniProt               | PDB |
|-----------|------------------------------------------------------|-----------|----------------------------------------------|------------------------------------------------------------------------|----------------|-----------------------|-----|
| Eukaryota | Putative fatty acid elongase 3-ketoacyl-CoA synthase |           | Oryza sativa (Rice).                         | AAG16863.1,<br>AAL31025.1,<br>AAP54239.1,<br>BAF26745.1,<br>BAG99955.1 | NP_001064831.1 | Q7XDH2 [T],<br>Q9FW59 |     |
| Eukaryota | Putative uncharacterized protein                     |           | Zea mays (Maize).                            | ACG30081.1,<br>ACN30933.1                                              | NP_001148181.1 | B6SYZ8 [T]            |     |
| Eukaryota | Putative uncharacterized protein                     |           | Zea mays (Maize).                            | ACF84426.1,<br>ACG47636.1                                              | NP_001152441.1 | B4FQN3 [T]            |     |
| Eukaryota | Putative uncharacterized protein<br>Sb01g019520      |           | Sorghum bicolor (Sorghum) (Sorghum vulgare). | EER94093.1                                                             | XP_002467095.1 | C5WYI0                |     |
| Eukaryota | Putative uncharacterized protein                     |           | Oryza sativa subsp. japonica (Rice).         | EAZ27141.1                                                             |                | A3AIK2                |     |
| Eukaryota | Putative fatty acid elongase                         |           | Oryza sativa subsp. japonica (Rice).         | AAR96223.1,<br>BAH92176.1                                              | NP_001173448.1 | Q75M84                |     |
| Eukaryota | Putative uncharacterized protein                     |           | Oryza sativa subsp. japonica (Rice).         | EAZ27142.1                                                             |                | A3AIK3                |     |
| Eukaryota | Os03g0383600 protein                                 |           | Oryza sativa subsp. japonica (Rice).         | ABF96286.1,<br>BAF12160.1                                              | NP_001050246.1 | Q10KI1                |     |
| Eukaryota | Putative uncharacterized protein                     |           | Oryza sativa subsp. indica (Rice).           | EAY90260.1                                                             |                | A2XHF0                |     |
| Eukaryota | Putative uncharacterized protein                     |           | Oryza sativa subsp. japonica (Rice).         | BAD21655.1,<br>BAD22394.1,<br>BAF10400.1,<br>EAZ25051.1                | NP_001048486.1 | Q6K3E6                |     |
| Eukaryota | Putative uncharacterized protein                     |           | Oryza sativa subsp. indica (Rice).           | EAY87986.1                                                             |                | A2XAX6                |     |

|           |                                                    |         |                                                                                             |                                                         |                |                         |  |
|-----------|----------------------------------------------------|---------|---------------------------------------------------------------------------------------------|---------------------------------------------------------|----------------|-------------------------|--|
| Eukaryota | Putative uncharacterized protein<br>Sb04g036880    |         | Sorghum bicolor (Sorghum) (Sorghum vulgare).                                                | EES07735.1                                              | XP_002454759.1 | C5XV97                  |  |
| Eukaryota | cDNA, clone: J065198N05, full insert<br>sequence   |         | Oryza sativa subsp. japonica (Rice).                                                        | AAR96244.1,<br>ABF96278.1,<br>BAF12157.1,<br>BAH01093.1 | NP_001050243.1 | Q75M74 [T]              |  |
| Eukaryota | Putative uncharacterized protein                   |         | Oryza sativa subsp. japonica (Rice).                                                        | EAZ27140.1                                              |                | A3AIK1                  |  |
| Eukaryota | Putative uncharacterized protein<br>Sb01g033910    |         | Sorghum bicolor (Sorghum) (Sorghum vulgare).                                                | EER94777.1                                              | XP_002467779.1 | C5WYK5                  |  |
| Eukaryota | Acyltransferase                                    |         | Zea mays (Maize).                                                                           | ACG29982.1                                              | NP_001148161.1 | B6SYP9 [T]              |  |
| Eukaryota | Putative uncharacterized protein                   |         | Zea mays (Maize).                                                                           | ACF82788.1                                              |                | B4FKZ5 [T]              |  |
| Eukaryota | Acyltransferase                                    |         | Zea mays (Maize).                                                                           | ACG47900.1                                              | NP_001152498.1 | B6UEW7 [T]              |  |
| Eukaryota | Putative uncharacterized protein                   |         | Vitis vinifera (Grape).                                                                     | CAN60802.1                                              | XP_002282219.1 | A5B0J1                  |  |
| Eukaryota | Beta-ketoacyl-CoA synthase family protein          |         | Arabidopsis lyrata subsp. lyrata.                                                           | EFH49413.1                                              | XP_002873154.1 | D7LXK1                  |  |
| Eukaryota | Very long-chain fatty acid condensing<br>enzyme 21 | 2.3.1.- | Arabidopsis thaliana (Mouse-ear<br>cress).                                                  | AAO63450.1,<br>BAC41850.1,<br>CAB85559.1                | NP_196073.1    | Q9LZ72 [T],<br>Q9LZ72.1 |  |
| Eukaryota | Beta-ketoacyl-coa synthase family protein          |         | Populus trichocarpa (Western balsam<br>poplar) (Populus balsamifera subsp.<br>trichocarpa). | EEF01427.1                                              | XP_002315256.1 | B9HTX8                  |  |
| Eukaryota | Beta-ketoacyl-coa synthase family protein          |         | Populus trichocarpa (Western balsam<br>poplar) (Populus balsamifera subsp.<br>trichocarpa). | EEE74009.1                                              | XP_002327204.1 | B9MW17                  |  |
| Eukaryota | Beta-ketoacyl-coa synthase family protein          |         | Populus trichocarpa (Western balsam<br>poplar) (Populus balsamifera subsp.<br>trichocarpa). | EEE74006.1                                              | XP_002327201.1 | B9MW14                  |  |

|           |                                           |  |                                                                                       |            |                |            |  |
|-----------|-------------------------------------------|--|---------------------------------------------------------------------------------------|------------|----------------|------------|--|
| Eukaryota | Beta-ketoacyl-coa synthase family protein |  | Populus trichocarpa (Western balsam poplar) (Populus balsamifera subsp. trichocarpa). | EEE74010.1 | XP_002327205.1 | B9MW20     |  |
| Eukaryota | Beta-ketoacyl-coa synthase family protein |  | Populus trichocarpa (Western balsam poplar) (Populus balsamifera subsp. trichocarpa). | EEF00412.1 | XP_002326030.1 | B9IQR0     |  |
| Eukaryota | Acyltransferase, putative                 |  | Ricinus communis (Castor bean).                                                       | EEF35589.1 | XP_002526783.1 | B9SLB4     |  |
| Eukaryota | Acyltransferase, putative                 |  | Ricinus communis (Castor bean).                                                       | EEF35590.1 | XP_002526784.1 | B9SLB5     |  |
| Eukaryota | PREDICTED: hypothetical protein           |  | Vitis vinifera                                                                        |            | XP_002276028.1 |            |  |
| Eukaryota | Putative uncharacterized protein          |  | Vitis vinifera (Grape).                                                               | CAN62551.1 |                | A5AJT6     |  |
| Eukaryota | PREDICTED: hypothetical protein           |  | Vitis vinifera                                                                        |            | XP_002284511.1 |            |  |
| Eukaryota | Acyltransferase, putative                 |  | Ricinus communis (Castor bean).                                                       | EEF28222.1 | XP_002534162.1 | B9T7E3     |  |
| Eukaryota | Beta-ketoacyl-coa synthase family protein |  | Populus trichocarpa (Western balsam poplar) (Populus balsamifera subsp. trichocarpa). | EEE83185.1 | XP_002298380.1 | B9GET3     |  |
| Eukaryota | Putative uncharacterized protein          |  | Populus trichocarpa (Western balsam poplar) (Populus balsamifera subsp. trichocarpa). | ABK95107.1 |                | A9PFF4 [T] |  |
| Eukaryota | Beta-ketoacyl-coa synthase family protein |  | Populus trichocarpa (Western balsam poplar) (Populus balsamifera subsp. trichocarpa). | EEE87410.1 | XP_002313455.1 | B9HPL4     |  |
| Eukaryota | 3-ketoacyl-CoA synthase 6                 |  | Gossypium hirsutum (Upland cotton) (Gossypium mexicanum).                             | ABX10441.1 |                | A9XU47 [T] |  |
| Eukaryota | 3-ketoacyl-CoA synthase 3                 |  | Gossypium hirsutum (Upland cotton) (Gossypium mexicanum).                             | ABX10439.1 |                | A9XU45 [T] |  |

|           |                                                 |         |                                              |                                                         |                |                         |
|-----------|-------------------------------------------------|---------|----------------------------------------------|---------------------------------------------------------|----------------|-------------------------|
| Eukaryota | Very long-chain fatty acid condensing enzyme 3  | 2.3.1.- | Arabidopsis thaliana (Mouse-ear cress).      | AAF75082.1,<br>AAL16279.1,<br>AAL32778.1,<br>AAM91194.1 | NP_172251.1    | Q9LQP8 [T],<br>Q9LQP8.2 |
| Eukaryota | Beta-ketoacyl-CoA synthase family protein       |         | Arabidopsis lyrata subsp. lyrata.            | EFH68673.1                                              | XP_002892414.1 | D7KH50                  |
| Eukaryota | Beta-ketoacyl-CoA synthase family protein       |         | Arabidopsis lyrata subsp. lyrata.            | EFH57258.1                                              | XP_002880999.1 | D7LJM8                  |
| Eukaryota | Very long-chain fatty acid condensing enzyme 12 | 2.3.1.- | Arabidopsis thaliana (Mouse-ear cress).      | AAD24372.1,<br>AAL07019.1,<br>AAM14134.1,<br>AAM61290.1 | NP_180431.1    | Q9SIB2 [T],<br>Q9SIB2.1 |
| Eukaryota | PREDICTED: hypothetical protein                 |         | Vitis vinifera                               |                                                         | XP_002263429.1 |                         |
| Eukaryota | Putative FAE1                                   |         | Oryza sativa subsp. japonica (Rice).         | BAD23320.1,<br>BAF24892.1                               | NP_001062978.1 | Q6K558                  |
| Eukaryota | Putative uncharacterized protein                |         | Oryza sativa subsp. indica (Rice).           | EAZ08784.1                                              |                | A2Z0C3                  |
| Eukaryota | Putative uncharacterized protein                |         | Oryza sativa subsp. japonica (Rice).         | EAZ44446.1                                              |                | A3BY07                  |
| Eukaryota | Putative uncharacterized protein                |         | Zea mays (Maize).                            | ACF79160.1,<br>ACN28898.1,<br>ACN29014.1,<br>ACN34671.1 | NP_001130803.1 | B4FAL7 [T]              |
| Eukaryota | Putative uncharacterized protein                |         | Zea mays (Maize).                            | ACF87791.1                                              |                | B4G098 [T]              |
| Eukaryota | Putative uncharacterized protein<br>Sb02g022830 |         | Sorghum bicolor (Sorghum) (Sorghum vulgare). | EER98791.1                                              | XP_002462270.1 | C5XAM8                  |

Subfamily 2J.

| Type      | Sequence                           | EC Number | Organism                          | GenBank ID | RefSeq         | UniProt    | PDB |
|-----------|------------------------------------|-----------|-----------------------------------|------------|----------------|------------|-----|
| Eukaryota | hypothetical protein               |           | Volvox carteri f. nagariensis Eve | EFJ47586.1 | XP_002951410.1 |            |     |
| Eukaryota | Fatty acid elongase 1              |           | Giardia intestinalis ATCC 50581.  | EET00530.1 |                | C6LTY1     |     |
| Eukaryota | Fatty acid elongase 1              |           | Giardia lamblia ATCC 50803.       | EDO80427.1 | XP_001708101.1 | A8BBZ1     |     |
| Eukaryota | Putative uncharacterized protein   |           | Perkinsus marinus ATCC 50983.     | EEQ98033.1 | XP_002765316.1 | C5LZ24     |     |
| Eukaryota | Delta9-elongating activity protein |           | Perkinsus marinus.                | ABF58686.1 |                | A2T1W6 [T] |     |
| Eukaryota | Putative uncharacterized protein   |           | Perkinsus marinus ATCC 50983.     | EEQ98028.1 | XP_002765311.1 | C5LZ19     |     |
| Eukaryota | 3-ketoacyl-CoA synthase, putative  | 2.3.1.156 | Entamoeba dispar SAW760.          | EDR26861.1 | XP_001736858.1 | B0EF12     |     |
| Eukaryota | Fatty acid elongase, putative      |           | Entamoeba histolytica.            | EAL49013.1 | XP_654403.1    | C4M5I2     |     |
| Eukaryota | 3-ketoacyl-CoA synthase, putative  | 2.3.1.74  | Entamoeba dispar SAW760.          | EDR28353.1 | XP_001735448.1 | B0EAU3     |     |
| Eukaryota | Fatty acid elongase, putative      |           | Entamoeba histolytica.            | EAL44771.2 | XP_650157.2    | C4M2E3     |     |
| Eukaryota | 3-ketoacyl-CoA synthase, putative  | 2.3.1.74  | Entamoeba dispar SAW760.          | EDR30038.1 | XP_001733822.1 | B0E601     |     |
| Eukaryota | Fatty acid elongase, putative      |           | Entamoeba histolytica.            | EAL49183.1 | XP_654571.1    | C4LUY4     |     |

|           |                                                  |          |                                           |                            |                |                       |  |
|-----------|--------------------------------------------------|----------|-------------------------------------------|----------------------------|----------------|-----------------------|--|
| Eukaryota | 3-ketoacyl-CoA synthase, putative                | 2.3.1.41 | Entamoeba dispar SAW760.                  | EDR25014.1                 | XP_001738646.1 | B0EKC7                |  |
| Eukaryota | Fatty acid elongase, putative                    |          | Entamoeba histolytica.                    | EAL49265.1                 | XP_654651.1    | C4LZ15                |  |
| Eukaryota | 3-ketoacyl-CoA synthase, putative                | 2.3.1.41 | Entamoeba dispar SAW760.                  | EDR27894.1                 | XP_001733313.1 | B0EC46                |  |
| Eukaryota | Fatty acid elongase, putative                    |          | Entamoeba histolytica.                    | EAL50716.1                 | XP_656100.1    | C4M9M6                |  |
| Eukaryota | Putative uncharacterized protein                 |          | Perkinsus marinus ATCC 50983.             | EER09322.1                 | XP_002777506.1 | C5L1S3                |  |
| Eukaryota | Putative uncharacterized protein                 |          | Perkinsus marinus ATCC 50983.             | EER07757.1                 | XP_002775941.1 | C5L6D0                |  |
| Eukaryota | 3-ketoacyl-CoA synthase                          |          | Ectocarpus siliculosus Ec 32              | CBN73964.1                 |                |                       |  |
| Eukaryota | Beta-ketoacyl-coa synthase                       |          | Thalassiosira pseudonana (Marine diatom). | EED92958.1                 | XP_002289421.1 | B8BZW4                |  |
| Eukaryota | Condensing enzyme                                |          | Phaeodactylum tricornutum.                | AAW70160.1<br>, EEC49201.1 | XP_002179378.1 | B7FWF7,<br>Q2TNU6 [T] |  |
| Eukaryota | Fatty acid elongase 3-ketoacyl-CoA synthase      |          | Polysphondylium pallidum PN500.           | EFA74550.1                 |                | D3BVP7                |  |
| Eukaryota | Probable 3-oxoacyl-acyl-carrier protein synthase | 2.3.1.41 | Dictyostelium discoideum (Slime mold).    | AAQ98882.1,<br>EAL65577.1  | XP_638938.1    | Q6TMJ4                |  |

## Outliers

| Type      | Sequence                                  | EC Number | Organism                                                                                                           | GenBank ID | RefSeq         | UniProt    | PDB |
|-----------|-------------------------------------------|-----------|--------------------------------------------------------------------------------------------------------------------|------------|----------------|------------|-----|
| Eukaryota | 3-ketoacyl-CoA synthase                   |           | <i>Dianthus caryophyllus</i> (Carnation)<br>(Clove pink).                                                          | BAI94499.1 |                | D4QD77 [T] |     |
| Eukaryota | Beta-ketoacyl-coa synthase family protein |           | <i>Populus trichocarpa</i> (Western balsam<br>poplar) ( <i>Populus balsamifera</i> subsp.<br><i>trichocarpa</i> ). | EEE94616.1 | XP_002307620.1 | B9H8F7     |     |
| Eukaryota | PREDICTED: hypothetical protein           |           | <i>Vitis vinifera</i>                                                                                              |            | XP_002275067.1 |            |     |
| Eukaryota | Putative uncharacterized protein          |           | <i>Vitis vinifera</i> (Grape).                                                                                     | CAN83354.1 |                | A5BKV5     |     |
| Eukaryota | PREDICTED: hypothetical protein           |           | <i>Vitis vinifera</i>                                                                                              |            | XP_002275004.1 |            |     |
| Eukaryota | Predicted protein                         |           | <i>Physcomitrella patens</i> subsp. <i>patens</i> .                                                                | EDQ55232.1 | XP_001779915.1 | A9TMU0     |     |
| Eukaryota | Putative uncharacterized protein          |           | <i>Picea sitchensis</i> (Sitka spruce).                                                                            | ADE76365.1 |                | D5A9Z6 [T] |     |
| Eukaryota | Beta-ketoacyl-CoA synthase                |           | <i>Dunaliella salina</i> .                                                                                         | AAK11266.1 |                | Q9AXE6 [T] |     |
| Eukaryota | hypothetical protein                      |           | <i>Volvox carteri</i> f. <i>nagariensis</i> Eve                                                                    | EFJ53061.1 | XP_002946066.1 |            |     |
| Eukaryota | Predicted protein                         |           | <i>Chlamydomonas reinhardtii</i> .                                                                                 | EDP00465.1 | XP_001697210.1 | A8J6G8     |     |
| Eukaryota | Putative uncharacterized protein          |           | <i>Oryza sativa</i> subsp. <i>japonica</i> (Rice).                                                                 | EAZ16080.1 |                | A3C4R7     |     |
| Eukaryota | Fatty acid elongase, putative, expressed  |           | <i>Oryza sativa</i> subsp. <i>japonica</i> (Rice).                                                                 | AAP53764.1 |                | Q7XEM4     |     |

|           |                                                 |  |                                                 |                                          |                |            |  |
|-----------|-------------------------------------------------|--|-------------------------------------------------|------------------------------------------|----------------|------------|--|
| Eukaryota | Fatty acid elongase                             |  | Zea mays (Maize).                               | ACG33906.1                               | NP_001149035.1 | B6T9X3 [T] |  |
| Eukaryota | Putative uncharacterized protein<br>Sb01g021910 |  | Sorghum bicolor (Sorghum) (Sorghum<br>vulgare). | EER91618.1                               | XP_002464620.1 | C5X1L0     |  |
| Eukaryota | Putative uncharacterized protein<br>Sb01g046290 |  | Sorghum bicolor (Sorghum) (Sorghum<br>vulgare). | EER95458.1                               | XP_002468460.1 | C5WWX3     |  |
| Eukaryota | Putative uncharacterized protein                |  | Oryza sativa subsp. indica (Rice).              | EAY88655.1                               |                | A2XCU5     |  |
| Eukaryota | Putative fatty acid elongase                    |  | Oryza sativa subsp. japonica (Rice).            | AAN06858.1,<br>ABF94124.1                |                | Q8H7Z0     |  |
| Eukaryota | hypothetical protein                            |  | Selaginella moellendorffii                      | EFJ29917.1                               | XP_002968801.1 |            |  |
| Eukaryota | hypothetical protein                            |  | Selaginella moellendorffii                      | EFJ25133.1                               | XP_002974178.1 |            |  |
| Eukaryota | hypothetical protein                            |  | Selaginella moellendorffii                      | EFJ28141.1                               | XP_002970815.1 |            |  |
| Eukaryota | hypothetical protein                            |  | Selaginella moellendorffii                      | EFJ29634.1                               | XP_002969546.1 |            |  |
| Eukaryota | hypothetical protein                            |  | Selaginella moellendorffii                      | EFJ15018.1                               | XP_002984006.1 |            |  |
| Eukaryota | hypothetical protein                            |  | Selaginella moellendorffii                      | EFJ37673.1                               | XP_002960134.1 |            |  |
| Eukaryota | Putative uncharacterized protein<br>Sb05g025040 |  | Sorghum bicolor (Sorghum) (Sorghum<br>vulgare). | AAD27560.1,<br>AAM94300.1,<br>EES08876.1 | XP_002449888.1 | Q9XEP1     |  |
| Eukaryota | Predicted protein                               |  | Physcomitrella patens subsp. patens.            | EDQ79046.1                               | XP_001756180.1 | A9RPU2     |  |



|           |                                                 |  |                                      |                           |                                   |        |  |
|-----------|-------------------------------------------------|--|--------------------------------------|---------------------------|-----------------------------------|--------|--|
| Eukaryota | Predicted protein                               |  | Physcomitrella patens subsp. patens. | EDQ77204.1                | XP_001757962.1                    | A9RVB4 |  |
| Eukaryota | FAE3                                            |  | Marchantia polymorpha (Liverwort).   | AAP74370.1                |                                   | Q7XZE8 |  |
| Eukaryota | Putative uncharacterized protein                |  | Oryza sativa subsp. indica (Rice).   | EAY97658.1                |                                   | A2Y3J8 |  |
| Eukaryota | Putative uncharacterized protein                |  | Oryza sativa subsp. japonica (Rice). | EAZ18954.1                |                                   | A3CCZ1 |  |
| Eukaryota | Os11g0591200 protein                            |  | Oryza sativa subsp. japonica (Rice). | BAF28547.1                | NP_001068184.1                    | Q0IRW8 |  |
| Eukaryota | Beta-ketoacyl-CoA synthase, putative, expressed |  | Oryza sativa subsp. japonica (Rice). | ABA94525.1                |                                   | Q2R1V7 |  |
| Eukaryota | Beta-ketoacyl-CoA-synthase                      |  | Marchantia polymorpha (Liverwort).   | AAO48425.1                |                                   | Q84VI8 |  |
| Eukaryota | Predicted protein                               |  | Physcomitrella patens subsp. patens. | EDQ56389.1                | XP_001778803.1                    | A9TJJ8 |  |
| Eukaryota | hypothetical protein                            |  | Selaginella moellendorffii           | EFJ14869.1,<br>EFJ38351.1 | XP_002960812.1,<br>XP_002983857.1 |        |  |

KS2 phylogenetic tree.

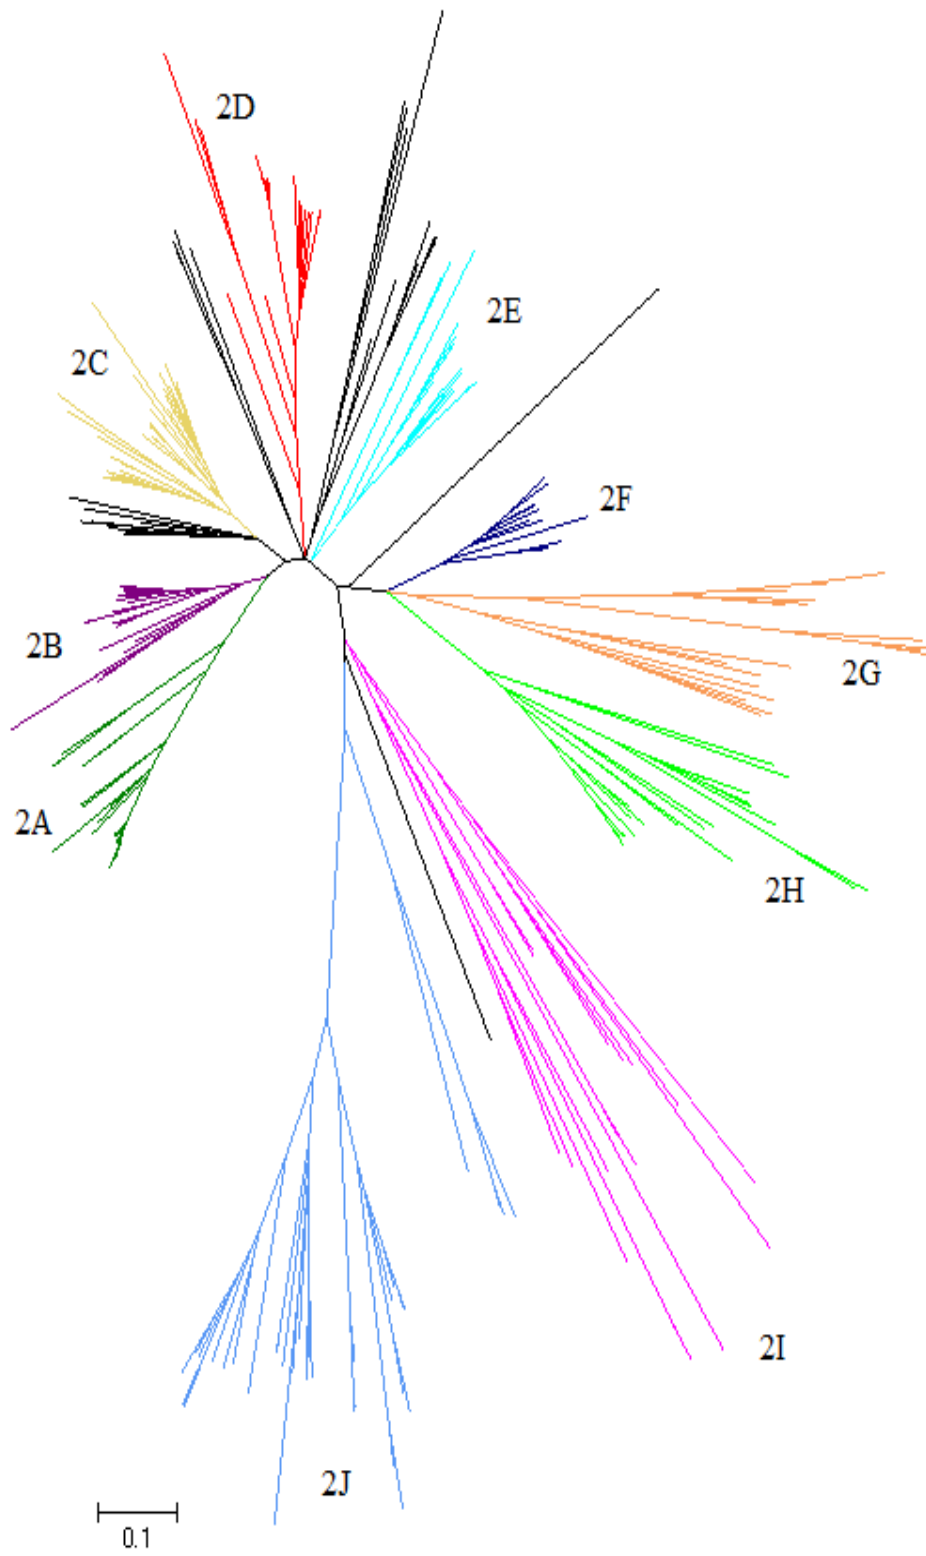

Supplement: pro0020-1659-SD5.pdf [file pro0020-1659-SD5.pdf]
