# Supplementary material
Source: PubMed Central journal article supplement (PMC3218358)

**Table S4.**  
**Subfamily 4A.**

| Type      | Sequence                                     | EC Number | Organism                                                     | GenBank ID                | RefSeq         | UniProt    | PDB |
|-----------|----------------------------------------------|-----------|--------------------------------------------------------------|---------------------------|----------------|------------|-----|
| Eukaryota | Predicted protein                            |           | <i>Physcomitrella patens</i> subsp. <i>patens</i> .          | EDQ78307.1                | XP_001757076.1 | A9RSI0     |     |
| Eukaryota | Chalcone synthase 8                          |           | <i>Zea mays</i> (Maize).                                     | ACG34408.1                | NP_001149157.1 | B6TBC5 [T] |     |
| Eukaryota | Putative uncharacterized protein Sb05g019856 |           | <i>Sorghum bicolor</i> (Sorghum) ( <i>Sorghum vulgare</i> ). | EES09850.1                | XP_002450862.1 | C5Y3D7     |     |
| Eukaryota | Putative uncharacterized protein Sb05g019850 |           | <i>Sorghum bicolor</i> (Sorghum) ( <i>Sorghum vulgare</i> ). | EES09849.1                | XP_002450861.1 | C5Y3D5     |     |
| Eukaryota | Putative uncharacterized protein Sb08g001230 |           | <i>Sorghum bicolor</i> (Sorghum) ( <i>Sorghum vulgare</i> ). | EES15556.1                | XP_002441718.1 | C5YQK0     |     |
| Eukaryota | Putative uncharacterized protein Sb05g019820 |           | <i>Sorghum bicolor</i> (Sorghum) ( <i>Sorghum vulgare</i> ). | EES09847.1                | XP_002450859.1 | C5Y3C7     |     |
| Eukaryota | Putative uncharacterized protein Sb02g001870 |           | <i>Sorghum bicolor</i> (Sorghum) ( <i>Sorghum vulgare</i> ). | EER95816.1                | XP_002459295.1 | C5X8N2     |     |
| Eukaryota | Putative uncharacterized protein             |           | <i>Oryza sativa</i> subsp. <i>indica</i> (Rice).             | EAZ04118.1                |                | A2YM07     |     |
| Eukaryota | Putative uncharacterized protein             |           | <i>Oryza sativa</i> subsp. <i>japonica</i> (Rice).           | BAF21742.1,<br>EAZ40065.1 | NP_001059828.1 | Q0D5Y1     |     |
| Eukaryota | Putative chalcone synthase                   |           | <i>Oryza sativa</i> subsp. <i>japonica</i> (Rice).           | BAD30750.1                |                | Q69UB7     |     |
| Eukaryota | Putative chalcone synthase 1                 |           | <i>Oryza sativa</i> subsp. <i>japonica</i> (Rice).           | BAC83820.1,<br>BAF21744.1 | NP_001059830.1 | Q6Z4M0     |     |
| Eukaryota | Putative uncharacterized protein             |           | <i>Oryza sativa</i> subsp. <i>indica</i> (Rice).             | EAZ04123.1                |                | A2YM12     |     |
| Eukaryota | Putative uncharacterized protein             |           | <i>Oryza sativa</i> subsp. <i>japonica</i> (Rice).           | EAZ40067.1                |                | A3BKH8     |     |

|           |                                              |  |                                                              |                                          |                |            |  |
|-----------|----------------------------------------------|--|--------------------------------------------------------------|------------------------------------------|----------------|------------|--|
| Eukaryota | Putative chalcone synthase                   |  | <i>Oryza sativa</i> subsp. <i>japonica</i> (Rice).           | BAD30758.1,<br>BAF21743.2                | NP_001059829.2 | Q69UA9     |  |
| Eukaryota | Putative uncharacterized protein             |  | <i>Oryza sativa</i> subsp. <i>indica</i> (Rice).             | EAZ04121.1                               |                | A2YM10     |  |
| Eukaryota | Putative chalcone synthase                   |  | <i>Oryza sativa</i> subsp. <i>japonica</i> (Rice).           | BAC79571.1,<br>BAD31021.1,<br>BAF21259.1 | NP_001059345.1 | Q8LIL0     |  |
| Eukaryota | Putative uncharacterized protein             |  | <i>Oryza sativa</i> subsp. <i>japonica</i> (Rice).           | EEE66942.1                               |                | B9FWK5     |  |
| Eukaryota | Putative uncharacterized protein Sb02g034030 |  | <i>Sorghum bicolor</i> (Sorghum) ( <i>Sorghum vulgare</i> ). | EER99419.1                               | XP_002462898.1 | C5X9A8     |  |
| Eukaryota | Putative uncharacterized protein             |  | <i>Zea mays</i> (Maize).                                     | ACF78730.1,<br>ACF84797.1                | NP_001140848.1 | B4F9D7 [T] |  |
| Eukaryota | Putative uncharacterized protein             |  | <i>Zea mays</i> (Maize).                                     | ACN36251.1                               |                | C0PM35 [T] |  |
| Eukaryota | Putative uncharacterized protein             |  | <i>Oryza sativa</i> subsp. <i>japonica</i> (Rice).           | EEE52211.1                               |                | B9GB05     |  |
| Eukaryota | Os11g0529900 protein                         |  | <i>Oryza sativa</i> subsp. <i>japonica</i> (Rice).           | ABA94120.1,<br>BAF28371.1                | NP_001068008.1 | Q2R3A4     |  |
| Eukaryota | Putative uncharacterized protein Sb05g019870 |  | <i>Sorghum bicolor</i> (Sorghum) ( <i>Sorghum vulgare</i> ). | EES09852.1                               | XP_002450864.1 | C5Y3D9     |  |
| Eukaryota | Os11g0529800 protein                         |  | <i>Oryza sativa</i> subsp. <i>japonica</i> (Rice).           | ABA94119.1,<br>BAF28370.1                | NP_001068007.1 | Q2R3A5     |  |
| Eukaryota | Putative uncharacterized protein             |  | <i>Oryza sativa</i> subsp. <i>indica</i> (Rice).             | EAY81153.1                               |                | A2ZEW9     |  |
| Eukaryota | Putative uncharacterized protein             |  | <i>Oryza sativa</i> subsp. <i>japonica</i> (Rice).           | ABA94039.1,<br>BAF28369.1,<br>EAZ18575.1 | NP_001068006.1 | Q2R3A8     |  |
| Eukaryota | Putative uncharacterized protein Sb05g019890 |  | <i>Sorghum bicolor</i> (Sorghum) ( <i>Sorghum vulgare</i> ). | EES08596.1                               | XP_002449608.1 | C5Y3E3     |  |

|           |                                              |  |                                              |                                                                        |                                   |                       |  |
|-----------|----------------------------------------------|--|----------------------------------------------|------------------------------------------------------------------------|-----------------------------------|-----------------------|--|
| Eukaryota | Putative uncharacterized protein Sb05g019950 |  | Sorghum bicolor (Sorghum) (Sorghum vulgare). | EES08603.1                                                             | XP_002449615.1                    | C5Y3P4                |  |
| Eukaryota | Putative uncharacterized protein Sb05g019940 |  | Sorghum bicolor (Sorghum) (Sorghum vulgare). | EES08602.1                                                             | XP_002449614.1                    | C5Y3P3                |  |
| Eukaryota | Putative uncharacterized protein Sb05g019910 |  | Sorghum bicolor (Sorghum) (Sorghum vulgare). | EES08598.1                                                             | XP_002449610.1                    | C5Y3E6                |  |
| Eukaryota | Putative uncharacterized protein Sb04g022590 |  | Sorghum bicolor (Sorghum) (Sorghum vulgare). | EES05236.1                                                             | XP_002452260.1                    | C5XU83                |  |
| Eukaryota | Putative uncharacterized protein Sb04g022860 |  | Sorghum bicolor (Sorghum) (Sorghum vulgare). | EES06976.1                                                             | XP_002454000.1                    | C5XUV6                |  |
| Eukaryota | Putative uncharacterized protein Sb02g034010 |  | Sorghum bicolor (Sorghum) (Sorghum vulgare). | EER99417.1                                                             | XP_002462896.1                    | C5X9A6                |  |
| Eukaryota | Putative uncharacterized protein Sb02g034020 |  | Sorghum bicolor (Sorghum) (Sorghum vulgare). | EER99418.1                                                             | XP_002462897.1                    | C5X9A7                |  |
| Eukaryota | Putative uncharacterized protein Sb08g003170 |  | Sorghum bicolor (Sorghum) (Sorghum vulgare). | EES15677.1                                                             | XP_002441839.1                    | C5YRS1                |  |
| Eukaryota | Putative uncharacterized protein Sb05g022510 |  | Sorghum bicolor (Sorghum) (Sorghum vulgare). | EES08732.1,<br>EES09995.1                                              | XP_002449744.1,<br>XP_002451007.1 | C5Y4Z2                |  |
| Eukaryota | Putative uncharacterized protein             |  | Oryza sativa subsp. japonica (Rice).         | BAD31062.1,<br>EAZ03974.1,<br>EAZ17461.1                               |                                   | A2YLL3,<br>Q69RQ3     |  |
| Eukaryota | cDNA clone:002-173-D05, full insert sequence |  | Oryza sativa subsp. japonica (Rice).         | BAC83267.1,<br>BAD31067.1,<br>BAF21633.1,<br>BAG99083.1,<br>EAZ03975.1 | NP_001059719.1                    | A2YLL4,<br>Q6ZIJ3 [T] |  |
| Eukaryota | Putative uncharacterized protein             |  | Oryza sativa subsp. japonica (Rice).         | EAZ39915.1                                                             |                                   | A3BK26                |  |
| Eukaryota | Putative uncharacterized protein Sb07g024260 |  | Sorghum bicolor (Sorghum) (Sorghum vulgare). | EES15184.1                                                             | XP_002445689.1                    | C5YN83                |  |

|           |                                                     |  |                                                    |                                          |                |                   |  |
|-----------|-----------------------------------------------------|--|----------------------------------------------------|------------------------------------------|----------------|-------------------|--|
| Eukaryota | Putative uncharacterized protein                    |  | <i>Oryza sativa</i> subsp. <i>indica</i> (Rice).   | EEC78715.1                               |                | B8AZ72            |  |
| Eukaryota | Putative uncharacterized protein<br>OSJNBb0067H15.2 |  | <i>Oryza sativa</i> subsp. <i>japonica</i> (Rice). | AAT47095.1                               |                | Q6I5C9            |  |
| Eukaryota | Putative uncharacterized protein                    |  | <i>Oryza sativa</i> subsp. <i>japonica</i> (Rice). | EEE62741.1                               |                | B9FN38            |  |
| Eukaryota | Putative uncharacterized protein<br>OSJNBb0067H15.3 |  | <i>Oryza sativa</i> subsp. <i>japonica</i> (Rice). | AAT44240.1,<br>AAT47096.1                |                | Q6L4H7            |  |
| Eukaryota | Putative uncharacterized protein                    |  | <i>Oryza sativa</i> subsp. <i>indica</i> (Rice).   | EAY96968.1                               |                | A2Y1K8            |  |
| Eukaryota | Putative uncharacterized protein                    |  | <i>Oryza sativa</i> subsp. <i>japonica</i> (Rice). | BAF16836.1,<br>EEE62742.1                | NP_001054922.1 | Q0DJY7            |  |
| Eukaryota | Putative uncharacterized protein                    |  | <i>Oryza sativa</i> subsp. <i>japonica</i> (Rice). | AAT44238.1,<br>AAT47094.1,<br>EEE62740.1 |                | Q6L4H9            |  |
| Eukaryota | Putative uncharacterized protein                    |  | <i>Oryza sativa</i> subsp. <i>indica</i> (Rice).   | EAY96966.1                               |                | A2Y1K6            |  |
| Eukaryota | Putative uncharacterized protein                    |  | <i>Oryza sativa</i> subsp. <i>indica</i> (Rice).   | EAY96969.1                               |                | A2Y1K9            |  |
| Eukaryota | Putative uncharacterized protein                    |  | <i>Oryza sativa</i> subsp. <i>japonica</i> (Rice). | AAT47098.1,<br>EEE62743.1                |                | Q6I5C6            |  |
| Eukaryota | Putative uncharacterized protein                    |  | <i>Oryza sativa</i> subsp. <i>indica</i> (Rice).   | EAY77848.1                               |                | A2Z5G4            |  |
| Eukaryota | Putative chalcone synthase                          |  | <i>Oryza sativa</i> (Rice).                        | AAL77133.1,<br>AAP52417.1,<br>EAZ15459.1 |                | Q7XGB4,<br>Q8SAU3 |  |
| Eukaryota | Os10g0177300 protein                                |  | <i>Oryza sativa</i> subsp. <i>japonica</i> (Rice). | BAF26158.2                               | NP_001064244.2 | Q0IYQ7            |  |
| Eukaryota | Os10g0167900 protein                                |  | <i>Oryza sativa</i> subsp. <i>japonica</i> (Rice). | BAF26141.2                               | NP_001064227.2 | Q0IYS4            |  |

|           |                                  |  |                                             |                                                                        |                |                   |  |
|-----------|----------------------------------|--|---------------------------------------------|------------------------------------------------------------------------|----------------|-------------------|--|
| Eukaryota | Putative uncharacterized protein |  | <i>Oryza sativa</i> subsp. japonica (Rice). | AAN04188.1,<br>AAP52307.1,<br>EAZ15421.1                               |                | Q8LM05            |  |
| Eukaryota | Putative uncharacterized protein |  | <i>Oryza sativa</i> subsp. indica (Rice).   | EAY77809.1                                                             |                | A2Z5C5            |  |
| Eukaryota | Putative uncharacterized protein |  | <i>Oryza sativa</i> subsp. indica (Rice).   | EAY77810.1                                                             |                | A2Z5C6            |  |
| Eukaryota | Putative chalcone synthase       |  | <i>Oryza sativa</i> (Rice).                 | AAM01005.1,<br>AAN04192.1,<br>AAP52312.1,<br>EAZ15422.1                |                | Q7G630,<br>Q8S762 |  |
| Eukaryota | Putative uncharacterized protein |  | <i>Oryza sativa</i> subsp. japonica (Rice). | EAZ24017.1                                                             |                | A3A9M8            |  |
| Eukaryota | Putative uncharacterized protein |  | <i>Oryza sativa</i> subsp. indica (Rice).   | EAY94419.1                                                             |                | A2XUA9            |  |
| Eukaryota | Putative chalcone synthase       |  | <i>Oryza sativa</i> (Rice).                 | AAK95679.1,<br>AAN04133.1,<br>AAP52217.1,<br>BAF26111.1,<br>EAZ15365.1 | NP_001064197.1 | Q7XGM8,<br>Q94GT4 |  |
| Eukaryota | Putative uncharacterized protein |  | <i>Oryza sativa</i> subsp. indica (Rice).   | EAY77763.1                                                             |                | A2Z579            |  |
| Eukaryota | Putative uncharacterized protein |  | <i>Oryza sativa</i> subsp. japonica (Rice). | EAZ24018.1                                                             |                | A3A9M9            |  |
| Eukaryota | Putative uncharacterized protein |  | <i>Oryza sativa</i> subsp. indica (Rice).   | EAY94420.1                                                             |                | A2XUB0            |  |
| Eukaryota | Putative uncharacterized protein |  | <i>Oryza sativa</i> subsp. indica (Rice).   | EAY93518.1                                                             |                | A2XRQ8            |  |
| Eukaryota | Putative uncharacterized protein |  | <i>Oryza sativa</i> subsp. japonica (Rice). | EEE60711.1                                                             |                | B9FEC8            |  |

|           |                                              |  |                                                              |                                          |                |                   |  |
|-----------|----------------------------------------------|--|--------------------------------------------------------------|------------------------------------------|----------------|-------------------|--|
| Eukaryota | OSJNBa0079M09.15 protein                     |  | <i>Oryza sativa</i> subsp. <i>japonica</i> (Rice).           | CAE05340.2,<br>CAH66072.1                |                | Q01ME3,<br>Q7XL19 |  |
| Eukaryota | Putative uncharacterized protein             |  | <i>Oryza sativa</i> subsp. <i>japonica</i> (Rice).           | EAZ18766.1                               |                | A3CCF3            |  |
| Eukaryota | Putative uncharacterized protein             |  | <i>Oryza sativa</i> subsp. <i>indica</i> (Rice).             | EAY84129.1                               |                | A2WZW9            |  |
| Eukaryota | cDNA clone:006-208-A07, full insert sequence |  | <i>Oryza sativa</i> subsp. <i>japonica</i> (Rice).           | ABA94265.2,<br>BAF28472.1,<br>BAG87751.1 | NP_001068109.1 | Q2R2G0 [T]        |  |
| Eukaryota | Putative uncharacterized protein Sb05g010090 |  | <i>Sorghum bicolor</i> (Sorghum) ( <i>Sorghum vulgare</i> ). | EES09672.1                               | XP_002450684.1 | C5Y219            |  |
| Eukaryota | Chalcone synthase-like                       |  | <i>Oryza sativa</i> subsp. <i>japonica</i> (Rice).           | BAD53000.1,<br>BAD53112.1                |                | Q5ZBB6            |  |
| Eukaryota | Putative uncharacterized protein             |  | <i>Oryza sativa</i> subsp. <i>indica</i> (Rice).             | EEC71032.1                               |                | B8ABH3            |  |
| Eukaryota | Putative uncharacterized protein Sb05g008850 |  | <i>Sorghum bicolor</i> (Sorghum) ( <i>Sorghum vulgare</i> ). | EES09649.1                               | XP_002450661.1 | C5Y1V7            |  |
| Eukaryota | OSIGBa0148I18.6 protein                      |  | <i>Oryza sativa</i> (Rice).                                  | CAH65769.1                               |                | Q01N31            |  |
| Eukaryota | cDNA clone:J023145I15, full insert sequence  |  | <i>Oryza sativa</i> subsp. <i>japonica</i> (Rice).           | BAF13917.1,<br>BAG94870.1,<br>CAE04488.2 | NP_001052003.1 | Q7XMR1<br>[T]     |  |
| Eukaryota | hypothetical protein                         |  | <i>Selaginella moellendorffii</i>                            | EFJ32542.1                               | XP_002966515.1 |                   |  |
| Eukaryota | hypothetical protein                         |  | <i>Selaginella moellendorffii</i>                            | EFJ16602.1                               | XP_002982357.1 |                   |  |
| Eukaryota | Octaketide synthase                          |  | <i>Hypericum perforatum</i> (St. John's wort).               | ACF37207.1                               |                | B4YPU5 [T]        |  |
| Eukaryota | Polyketide synthase                          |  | <i>Hypericum perforatum</i> (St. John's wort).               | ABP98923.1                               |                | A8QW47<br>[T]     |  |

|           |                                                   |           |                                                                                                              |                                          |                |                         |  |
|-----------|---------------------------------------------------|-----------|--------------------------------------------------------------------------------------------------------------|------------------------------------------|----------------|-------------------------|--|
| Eukaryota | Putative uncharacterized protein                  |           | Glycine max (Soybean) ( <i>Glycine hispida</i> ).                                                            | ACU19691.1                               |                | C6TCY9 [T]              |  |
| Eukaryota | Predicted protein                                 |           | <i>Physcomitrella patens</i> subsp. <i>patens</i> .                                                          | EDQ78198.1                               | XP_001756967.1 | A9RSH9                  |  |
| Eukaryota | Chalcone synthase, putative                       | 2.3.1.74  | <i>Ricinus communis</i> (Castor bean).                                                                       | EEF42075.1                               | XP_002520289.1 | B9S2S0                  |  |
| Eukaryota | Chalcone synthase-like protein                    | 2.3.1.74  | <i>Populus trichocarpa</i> (Western balsam poplar) ( <i>Populus balsamifera</i> subsp. <i>trichocarpa</i> ). | EEE84002.1                               | XP_002299197.1 | B9GLZ2                  |  |
| Eukaryota | 3-methyl-1-(trihydroxyphenyl)butan-1-one synthase | 2.3.1.156 | <i>Psilotum nudum</i> (Whisk fern) ( <i>Lycopodium nudum</i> ).                                              | BAA87923.1                               |                | Q9SLX9 [T],<br>Q9SLX9.1 |  |
| Eukaryota | Chalcone synthase                                 |           | <i>Aquilaria sinensis</i> .                                                                                  | ABM73433.1                               |                | A2I5G1 [T]              |  |
| Eukaryota | Benzophenone synthase                             |           | <i>Hypericum perforatum</i> (St. John's wort).                                                               | ABP49616.1                               |                | A4ZYX5 [T]              |  |
| Eukaryota | Trihydroxybenzophenone synthase                   | 2.3.1.-   | <i>Hypericum androsaemum</i> (Tutsan).                                                                       | AAL79808.1                               |                | Q8SAS8 [P],<br>Q8SAS8.1 |  |
| Eukaryota | Polyketide synthase type III isoform 1            | 2.3.1.-   | <i>Wachendorfia thyrsiflora</i> (Bloodroot).                                                                 | AAW50921.1                               |                | Q3ZMG6 [T]              |  |
| Eukaryota | Bibenzyl synthase                                 |           | <i>Bromheadia finlaysoniana</i> (Orchid).                                                                    | CAA10514.1                               |                | Q9ZRS2 [T]              |  |
| Eukaryota | Chalcone synthase                                 |           | <i>Oncidium Gower Ramsey</i> .                                                                               | AAZ32093.1                               |                | Q45RTO                  |  |
| Eukaryota | Chalcone synthase                                 | 2.3.1.74  | <i>Phalaenopsis</i> hybrid cultivar.                                                                         | AAX54693.1                               |                | Q58G81                  |  |
| Eukaryota | Bibenzyl synthase                                 | 2.3.1.-   | <i>Phalaenopsis</i> sp.                                                                                      | AAB65094.1,<br>CAA56276.1,<br>CAA56277.1 |                | P53416 [T],<br>P53416.1 |  |
| Eukaryota | Chalcone synthase                                 | 2.3.1.74  | <i>Phalaenopsis</i> hybrid cultivar.                                                                         | AAV70116.1                               |                | Q5PU46                  |  |

|           |                                |  |                                                 |                           |  |            |                        |
|-----------|--------------------------------|--|-------------------------------------------------|---------------------------|--|------------|------------------------|
| Eukaryota | Chalcone synthase              |  | Oncidium Gower Ramsey.                          | AAZ32095.1                |  | Q45RS8     |                        |
| Eukaryota | Chalcone synthase              |  | Oncidium Gower Ramsey.                          | AAZ32094.1                |  | Q45RS9     |                        |
| Eukaryota | Polyketide synthase            |  | Plumbago indica.                                | BAF44539.1                |  | A1IHK4 [T] |                        |
| Eukaryota | Putative stilbene synthase     |  | Polygonum cuspidatum (Japanese knotweed).       | ABE68892.1,<br>ABE68893.1 |  | Q1PA49 [T] |                        |
| Eukaryota | Aloesone synthase              |  | Rheum palmatum.                                 | AAS87170.1                |  | Q6R313 [T] |                        |
| Eukaryota | Type III polyketide synthase 3 |  | Polygonum cuspidatum (Japanese knotweed).       | ACC76752.1                |  | B2MWQ7 [T] |                        |
| Eukaryota | Pentaketide chromone synthase  |  | Aloe arborescens (Kidachi aloe).                | AAX35541.1                |  | Q58VP7 [P] | 2D3M,<br>2D51,<br>2D52 |
| Eukaryota | Pentaketide chromone synthase  |  | Aloe arborescens (Kidachi aloe).                | AAX35541.1                |  | Q58VP7 [P] | 2D3M,<br>2D51,<br>2D52 |
| Eukaryota | Pentaketide chromone synthase  |  | Aloe arborescens (Kidachi aloe).                | AAX35541.1                |  | Q58VP7 [P] | 2D3M,<br>2D51,<br>2D52 |
| Eukaryota | Type III polyketide synthase   |  | Aloe arborescens (Kidachi aloe).                | ACR19998.1                |  | C4NF91 [T] |                        |
| Eukaryota | Aloesone synthase              |  | Aloe arborescens (Kidachi aloe).                | ABS72373.1                |  | C4MBZ5 [T] |                        |
| Eukaryota | Octaketide synthase            |  | Aloe arborescens (Kidachi aloe).                | AAT48709.1                |  | Q3L7F5 [T] |                        |
| Eukaryota | Type III polyketide synthase   |  | Aloe arborescens (Kidachi aloe).                | ACR19997.1                |  | C4NF90 [T] |                        |
| Eukaryota | Stilbene synthase              |  | Psilotum nudum (Whisk fern) (Lycopodium nudum). | BAA87925.1                |  | Q9SLX7 [T] |                        |



|           |                                |          |                                                                               |            |  |                         |  |
|-----------|--------------------------------|----------|-------------------------------------------------------------------------------|------------|--|-------------------------|--|
| Eukaryota | Stilbene synthase              |          | <i>Psilotum nudum</i> (Whisk fern) ( <i>Lycopodium nudum</i> ).               | BAA87924.1 |  | Q9SLX8 [T]              |  |
| Eukaryota | Naringenin-chalcone synthase B | 2.3.1.74 | <i>Petunia hybrida</i> ( <i>Petunia</i> ).                                    | CAA32732.1 |  | P22924 [T],<br>P22924.1 |  |
| Eukaryota | Naringenin-chalcone synthase B | 2.3.1.74 | <i>Ipomoea triloba</i> (Trilobed morning glory).                              | AAC49035.1 |  | P48404,<br>P48404.1     |  |
| Eukaryota | Naringenin-chalcone synthase B | 2.3.1.74 | <i>Ipomoea purpurea</i> (Common morning glory) ( <i>Pharbitis purpurea</i> ). | AAC49030.1 |  | P48398,<br>P48398.1     |  |
| Eukaryota | Naringenin-chalcone synthase B | 2.3.1.74 | <i>Ipomoea nil</i> (Japanese morning glory) ( <i>Pharbitis nil</i> ).         | AAC49029.1 |  | P48396,<br>P48396.1     |  |
| Eukaryota | Naringenin-chalcone synthase A | 2.3.1.74 | <i>Ipomoea triloba</i> (Trilobed morning glory).                              | AAC49034.1 |  | P48403,<br>P48403.1     |  |
| Eukaryota | Naringenin-chalcone synthase A | 2.3.1.74 | <i>Ipomoea cordatotriloba</i> (Cotton morning glory).                         | AAC49026.1 |  | P48393,<br>P48393.1     |  |
| Eukaryota | Naringenin-chalcone synthase A | 2.3.1.74 | <i>Ipomoea trifida</i> (Morning glory).                                       | AAC49032.1 |  | P48401,<br>P48401.1     |  |
| Eukaryota | Naringenin-chalcone synthase B | 2.3.1.74 | <i>Ipomoea cordatotriloba</i> (Cotton morning glory).                         | AAC49027.1 |  | P48394,<br>P48394.1     |  |
| Eukaryota | Naringenin-chalcone synthase B | 2.3.1.74 | <i>Ipomoea trifida</i> (Morning glory).                                       | AAC49033.1 |  | P48402,<br>P48402.1     |  |
| Eukaryota | Naringenin-chalcone synthase A | 2.3.1.74 | <i>Ipomoea platensis</i> (Morning glory).                                     | AAA62497.1 |  | P48400 [T],<br>P48400.1 |  |
| Eukaryota | Naringenin-chalcone synthase A | 2.3.1.74 | <i>Ipomoea nil</i> (Japanese morning glory) ( <i>Pharbitis nil</i> ).         | AAC49028.1 |  | P48395,<br>P48395.1     |  |
| Eukaryota | Naringenin-chalcone synthase C | 2.3.1.74 | <i>Ipomoea purpurea</i> (Common morning glory) ( <i>Pharbitis purpurea</i> ). | AAC49031.1 |  | P48399,<br>P48399.1     |  |
| Eukaryota | Chalcone synthase-A            |          | <i>Ipomoea purpurea</i> (Common morning glory) ( <i>Pharbitis purpurea</i> ). | AAB62590.1 |  | O04970                  |  |

|           |                                        |          |                                                                      |                                                                                       |  |                                |  |
|-----------|----------------------------------------|----------|----------------------------------------------------------------------|---------------------------------------------------------------------------------------|--|--------------------------------|--|
| Eukaryota | Chalcone synthase-A                    |          | <i>Ipomoea purpurea</i> (Common morning glory) (Pharbitis purpurea). | AAB62588.1                                                                            |  | O04968                         |  |
| Eukaryota | Chalcone synthase-A                    |          | <i>Ipomoea purpurea</i> (Common morning glory) (Pharbitis purpurea). | AAB62589.1                                                                            |  | O04969                         |  |
| Eukaryota | Naringenin-chalcone synthase A         | 2.3.1.74 | <i>Ipomoea purpurea</i> (Common morning glory) (Pharbitis purpurea). | AAB02620.1,<br>AAB62582.1,<br>AAB62584.1,<br>AAB62585.1,<br>AAB62586.1,<br>AAB62591.1 |  | O04971,<br>P48397,<br>P48397.2 |  |
| Eukaryota | Chalcone synthase-A                    |          | <i>Ipomoea purpurea</i> (Common morning glory) (Pharbitis purpurea). | AAB62587.1                                                                            |  | O04967                         |  |
| Eukaryota | Naringenin-chalcone synthase A         | 2.3.1.74 | <i>Ipomoea purpurea</i> (Common morning glory) (Pharbitis purpurea). | AAB02620.1,<br>AAB62582.1,<br>AAB62584.1,<br>AAB62585.1,<br>AAB62586.1,<br>AAB62591.1 |  | O04971,<br>P48397,<br>P48397.2 |  |
| Eukaryota | Chalcone synthase-A                    |          | <i>Ipomoea purpurea</i> (Common morning glory) (Pharbitis purpurea). | AAB62583.1                                                                            |  | O04966                         |  |
| Eukaryota | Polyketide synthase type III           | 2.3.1.-  | <i>Wachendorfia thyrsoflora</i> (Bloodroot).                         | AAY51378.1                                                                            |  | Q2TCH1 [T]                     |  |
| Eukaryota | Polyketide synthase type III isoform 2 | 2.3.1.-  | <i>Wachendorfia thyrsoflora</i> (Bloodroot).                         | AAW50922.1                                                                            |  | Q3L5A7 [T]                     |  |
| Eukaryota | Type III polyketide synthase 2         |          | <i>Musa acuminata</i> AAA Group.                                     | ADE59486.1                                                                            |  | D5KZJ9 [T]                     |  |
| Eukaryota | Curcumin synthase                      |          | <i>Curcuma longa</i> (Turmeric) ( <i>Curcuma domestica</i> ).        | BAH56226.1                                                                            |  | C0SVZ6 [T]                     |  |
| Eukaryota | Curcumin synthase                      |          | <i>Curcuma longa</i> (Turmeric) ( <i>Curcuma domestica</i> ).        | BAH85781.1                                                                            |  | C6L7V9 [T]                     |  |
| Eukaryota | Chalcone synthase                      |          | <i>Zingiber officinale</i> (Ginger) ( <i>Amomum zingiber</i> ).      | ABF20067.1                                                                            |  | A5GZV8 [T]                     |  |

|           |                                |  |                                               |                                          |                                                      |            |
|-----------|--------------------------------|--|-----------------------------------------------|------------------------------------------|------------------------------------------------------|------------|
| Eukaryota | Curcumin synthase              |  | Curcuma longa (Turmeric) (Curcuma domestica). | BAH85780.1                               |                                                      | C6L7V8 [T] |
| Eukaryota | Type III polyketide synthase 1 |  | Musa acuminata AAA Group.                     | ADE59485.1                               |                                                      | D5KZJ8 [T] |
| Eukaryota | Chalcone synthase-like protein |  | Lunularia cruciata.                           | ABF67971.1                               |                                                      | Q19MQ4     |
| Eukaryota | Stilbenecarboxylate synthase 1 |  | Marchantia polymorpha (Liverwort).            | AAW30009.1                               |                                                      | Q5I6Y2     |
| Eukaryota | Chalcone synthase-like         |  | Marchantia paleacea var. diptera.             | BAD42328.1                               |                                                      | Q68BL6 [T] |
| Eukaryota | Chalcone synthase-like         |  | Marchantia paleacea var. diptera.             | BAD42329.1                               |                                                      | Q68BL5     |
| Eukaryota | Predicted protein              |  | Physcomitrella patens subsp. patens.          | EDQ79305.1                               | XP_001756020.1                                       | A9RPL0     |
| Eukaryota | Predicted protein              |  | Physcomitrella patens subsp. patens.          | EDQ50371.1                               | XP_001784819.1                                       | A9U1T2     |
| Eukaryota | Predicted protein              |  | Physcomitrella patens subsp. patens.          | EDQ57316.1                               | XP_001777888.1                                       | A9TGY4     |
| Eukaryota | Predicted protein              |  | Physcomitrella patens subsp. patens.          | EDQ75430.1                               | XP_001759926.1                                       | A9S0L4     |
| Eukaryota | Predicted protein              |  | Physcomitrella patens subsp. patens.          | EDQ53708.1,<br>EDQ53739.1,<br>EDQ54185.1 | XP_001781001.1,<br>XP_001781433.1,<br>XP_001781464.1 | A9TQV2     |
| Eukaryota | Predicted protein              |  | Physcomitrella patens subsp. patens.          | EDQ51735.1,<br>EDQ51744.1                | XP_001783444.1,<br>XP_001783453.1                    | A9TXW3     |
| Eukaryota | Predicted protein              |  | Physcomitrella patens subsp. patens.          | EDQ49827.1                               | XP_001785366.1                                       | A9U3C9     |
| Eukaryota | Predicted protein              |  | Physcomitrella patens subsp. patens.          | EDQ49824.1,<br>EDQ49829.1,<br>EDQ83741.1 | XP_001751424.1,<br>XP_001785363.1,<br>XP_001785368.1 | A9RAS0     |

|           |                                            |           |                                                   |                           |                                   |            |      |
|-----------|--------------------------------------------|-----------|---------------------------------------------------|---------------------------|-----------------------------------|------------|------|
|           |                                            | 2.3.1.74  |                                                   |                           |                                   |            |      |
| Eukaryota | Chalcone synthase                          |           | Physcomitrella patens (Moss).                     | ABB84527.1                |                                   | Q2VAZ3 [T] |      |
| Eukaryota | Predicted protein                          |           | Physcomitrella patens subsp. patens.              | EDQ49525.1,<br>EDQ50363.1 | XP_001784853.1,<br>XP_001785666.1 | A9U1W8     |      |
| Eukaryota | Predicted protein                          |           | Physcomitrella patens subsp. patens.              | EDQ78673.1                | XP_001756277.1                    | A9RQT8     |      |
| Eukaryota | hypothetical protein                       |           | Selaginella moellendorffii                        | EFJ37435.1                | XP_002962175.1                    |            |      |
| Eukaryota | hypothetical protein                       |           | Selaginella moellendorffii                        | EFJ33924.1                | XP_002965086.1                    |            |      |
| Eukaryota | Stilbenecarboxylate synthase 2             |           | Marchantia polymorpha (Liverwort).                | AAW30010.1                |                                   | Q5I6Y1 [P] | 2POU |
| Eukaryota | Stilbenecarboxylate synthase 2             |           | Marchantia polymorpha (Liverwort).                | AAW30010.1                |                                   | Q5I6Y1 [P] | 2POU |
| Eukaryota | Chalcone synthase-like polyketide synthase |           | Huperzia serrata.                                 | ABI94386.1                |                                   | A3E7Z7 [T] |      |
| Eukaryota | hypothetical protein                       |           | Selaginella moellendorffii                        | EFJ21767.1                | XP_002977158.1                    |            |      |
| Eukaryota | hypothetical protein                       |           | Selaginella moellendorffii                        | EFJ34147.1                | XP_002965309.1                    |            |      |
| Eukaryota | Biphenyl synthase 3                        | 2.3.1.117 | Sorbus aucuparia (European mountain ash) (Rowan). | ACW82505.1                |                                   | D2DRC5 [T] |      |
| Eukaryota | Biphenyl synthase 2                        | 2.3.1.177 | Sorbus aucuparia (European mountain ash) (Rowan). | ACW82504.1                |                                   | D2DRC4 [T] |      |
| Eukaryota | Biphenyl synthase                          |           | Sorbus aucuparia (European mountain ash) (Rowan). | ABB89212.1                |                                   | Q27Z07 [T] |      |
| Eukaryota | Olivetol synthase                          |           | Cannabis sativa (Hemp) (Marijuana).               | BAG14339.1                |                                   | B1Q2B6 [T] |      |

|           |                        |          |                                     |                           |  |            |  |
|-----------|------------------------|----------|-------------------------------------|---------------------------|--|------------|--|
| Eukaryota | CAN383                 |          | Cannabis sativa (Hemp) (Marijuana). | ACT10338.1                |  | C6KI62 [T] |  |
| Eukaryota | Chalcone synthase      | 2.3.1.74 | Humulus lupulus (European hop).     | ACM17225.1                |  | B9VI86 [T] |  |
| Eukaryota | Chalcone synthase      | 2.3.1.74 | Humulus lupulus (European hop).     | BAB47194.1,<br>BAB47195.1 |  | Q93V86 [T] |  |
| Eukaryota | Valerophenone synthase |          | Humulus lupulus (European hop).     | ACD69658.1                |  | B3GEB6     |  |
| Eukaryota | Valerophenone synthase |          | Humulus lupulus (European hop).     | ACD69657.1                |  | B3GEB5     |  |
| Eukaryota | Valerophenone synthase |          | Humulus lupulus (European hop).     | ACD69655.1,<br>ACD69659.1 |  | B3GEB3     |  |
| Eukaryota | Valerophenone synthase | 2.3.1.74 | Humulus lupulus (European hop).     | ACM17227.1                |  | B9VI88 [T] |  |
| Eukaryota | Valerophenone synthase |          | Humulus lupulus (European hop).     | ACD69650.1                |  | B3GEA8     |  |
| Eukaryota | Valerophenone synthase |          | Humulus lupulus (European hop).     | ACD69653.1                |  | B3GEB1     |  |
| Eukaryota | Valerophenone synthase |          | Humulus lupulus (European hop).     | ACD69652.1                |  | B3GEB0     |  |
| Eukaryota | Valerophenone synthase |          | Humulus lupulus (European hop).     | ACD69656.1                |  | B3GEB4     |  |
| Eukaryota | Valerophenone synthase |          | Humulus lupulus (European hop).     | ACD69648.1                |  | B3GEA6     |  |
| Eukaryota | Valerophenone synthase |          | Humulus lupulus (European hop).     | ACD69654.1                |  | B3GEB2     |  |
| Eukaryota | Valerophenone synthase |          | Humulus lupulus (European hop).     | ACD69649.1                |  | B3GEA7     |  |

|           |                                                   |           |                                                               |                           |                |                         |
|-----------|---------------------------------------------------|-----------|---------------------------------------------------------------|---------------------------|----------------|-------------------------|
| Eukaryota | Valerophenone synthase                            |           | <i>Humulus lupulus</i> (European hop).                        | ACD69651.1                |                | B3GEA9                  |
| Eukaryota | 3-methyl-1-(trihydroxyphenyl)butan-1-one synthase | 2.3.1.156 | <i>Humulus lupulus</i> (European hop).                        | BAA29039.1,<br>BAB12102.1 |                | O80400 [T],<br>O80400.1 |
| Eukaryota | Chalcone synthase                                 | 2.3.1.74  | <i>Humulus lupulus</i> (European hop).                        | BAB47196.1                |                | Q94LW8                  |
| Eukaryota | CHS-like protein                                  |           | <i>Humulus lupulus</i> (European hop).                        | CAD23044.1                |                | Q8LPD8                  |
| Eukaryota | Chalcone synthase                                 | 2.3.1.74  | <i>Humulus lupulus</i> (European hop).                        | ACM17226.1                |                | B9VI87 [T]              |
| Eukaryota | Type III polyketide synthase 4                    |           | <i>Musa acuminata</i> AAA Group.                              | ADE59488.1                |                | D5KZK1 [T]              |
| Eukaryota | Type III polyketide synthase 5                    |           | <i>Musa acuminata</i> AAA Group.                              | ADE59489.1                |                | D5KZK2 [T]              |
| Eukaryota | Diketide CoA synthase                             |           | <i>Curcuma longa</i> (Turmeric) ( <i>Curcuma domestica</i> ). | BAH56225.1                |                | C0SVZ5 [T]              |
| Eukaryota | Diketide-CoA synthase                             |           | <i>Curcuma longa</i> (Turmeric) ( <i>Curcuma domestica</i> ). | BAI50014.1                |                | D0W034 [T]              |
| Eukaryota | Putative uncharacterized protein                  |           | <i>Vitis vinifera</i> (Grape).                                | CAN76172.1                |                | A5AY43                  |
| Eukaryota | Putative uncharacterized protein                  |           | <i>Vitis vinifera</i> (Grape).                                | CAN81964.1                |                | A5C9N3                  |
| Eukaryota | Putative uncharacterized protein                  |           | <i>Vitis vinifera</i> (Grape).                                | CAN73761.1                |                | A5AT85                  |
| Eukaryota | PREDICTED: hypothetical protein                   |           | <i>Vitis vinifera</i>                                         |                           | XP_002269451.1 |                         |
| Eukaryota | PREDICTED: hypothetical protein                   |           | <i>Vitis vinifera</i>                                         |                           | XP_002265991.1 |                         |

|           |                                       |           |                                                                                       |                           |                |                         |                        |
|-----------|---------------------------------------|-----------|---------------------------------------------------------------------------------------|---------------------------|----------------|-------------------------|------------------------|
| Eukaryota | Putative uncharacterized protein      |           | Vitis vinifera (Grape).                                                               | CAN78680.1                |                | A5B621                  |                        |
| Eukaryota | Type III polyketide synthase          |           | Drosophyllum lusitanicum (Portuguese sundew).                                         | ABQ59603.1                |                | B0L804 [T]              |                        |
| Eukaryota | Chalcone synthase-like protein        | 2.3.1.74  | Populus trichocarpa (Western balsam poplar) (Populus balsamifera subsp. trichocarpa). | EEE73513.1                | XP_002333197.1 | B9ND63                  |                        |
| Eukaryota | Putative chalcone synthase            |           | Antirrhinum majus (Garden snapdragon).                                                | BAE80511.1                |                | Q2ABY3 [T]              |                        |
| Eukaryota | Chalcone synthase superfamily protein |           | Psilotum nudum (Whisk fern) (Lycopodium nudum).                                       | BAA92742.1                |                | Q9MB03 [T]              |                        |
| Eukaryota | Chalcone synthase                     |           | Psilotum nudum (Whisk fern) (Lycopodium nudum).                                       | BAA87922.1                |                | Q9SLY0 [T]              |                        |
| Eukaryota | Acridone synthase II                  | 2.3.1.159 | Ruta graveolens (Common rue).                                                         | CAC14058.1                |                | Q9FSC0 [P],<br>Q9FSC0.1 |                        |
| Eukaryota | Acridone synthase III                 | 2.3.1.159 | Ruta graveolens (Common rue).                                                         | CAC14056.2                |                | Q9FSC2 [T],<br>Q9FSC2.1 |                        |
| Eukaryota | Acridone synthase IV                  | 2.3.1.159 | Ruta graveolens (Common rue).                                                         | CAC14057.1                |                | Q9FSC1 [T],<br>Q9FSC1.1 |                        |
| Eukaryota | Type III polyketide synthase          |           | Polygonum cuspidatum (Japanese knotweed).                                             | ABY47640.1,<br>ABY47641.1 |                | A9YWN4 [T]              |                        |
| Eukaryota | Benzalacetone synthase                |           | Rheum palmatum.                                                                       | AAK82824.1                |                | Q94FV7 [P]              | 3A5Q,<br>3A5R,<br>3A5S |
| Eukaryota | Stilbene synthase                     | 2.3.1.95  | Rheum tataricum.                                                                      | AAP13782.1                |                | Q84Q58 [T]              |                        |
| Eukaryota | Resveratrol synthase                  |           | Polygonum cuspidatum (Japanese knotweed).                                             | ABI78940.1                |                | D2CFU4 [T]              |                        |
| Eukaryota | STS                                   |           | Polygonum cuspidatum (Japanese knotweed).                                             | ACC76753.1                |                | B2MWQ8 [T]              |                        |

|           |                                       |          |                                                                  |            |  |                            |               |
|-----------|---------------------------------------|----------|------------------------------------------------------------------|------------|--|----------------------------|---------------|
| Eukaryota | Resveratrol-forming stilbene synthase |          | <i>Polygonum cuspidatum</i> (Japanese knotweed).                 | ABS82270.1 |  | B6RBJ7 [T]                 |               |
| Eukaryota | Chalcone synthase                     |          | <i>Gerbera hybrida</i> .                                         | CAA62682.1 |  | Q39923                     |               |
| Eukaryota | Chalcone synthase                     |          | <i>Gerbera hybrida</i> .                                         | CAP20329.1 |  | B7ZF47 [T]                 |               |
| Eukaryota | G2ps1                                 | 2.3.1.-  | <i>Gerbera hybrida</i> .                                         | CAA86219.2 |  | P48391 [P],<br>P48391.2    | 1EE0,<br>1QLV |
| Eukaryota | Chalcone synthase                     |          | <i>Gerbera hybrida</i> .                                         | CAP20330.1 |  | B7ZF48 [T]                 |               |
| Eukaryota | Chalcone synthase                     |          | <i>Gerbera hybrida</i> .                                         | CAA62683.1 |  | Q39788                     |               |
| Eukaryota | Naregenin-chalcone synthase           | 2.3.1.74 | <i>Persea americana</i> (Avocado).                               | AAC98143.1 |  | Q9ZU06<br>[T],<br>Q9ZU06.1 |               |
| Eukaryota | Naringenin-chalcone synthase G        | 2.3.1.74 | <i>Petunia hybrida</i> (Petunia).                                | CAA32735.1 |  | P22927 [T],<br>P22927.2    |               |
| Eukaryota | p-coumaroyltriacyclic acid synthase   |          | <i>Equisetum hyemale</i> (Dutch rush) (Scouring-rush horsetail). | ACQ91099.1 |  | D2D3P0 [T]                 |               |
| Eukaryota | Stilbene synthase                     |          | <i>Bauhinia variegata</i> (Purple orchid tree).                  | ABF59517.1 |  | Q1G0Y3 [T]                 |               |
| Eukaryota | Trihydroxystilbene synthase           | 2.3.1.95 | <i>Arachis hypogaea</i> (Peanut).                                | AAO11837.1 |  | Q8GUS2 [T]                 |               |
| Eukaryota | Resveratrol synthase                  | 2.3.1.95 | <i>Arachis hypogaea</i> (Peanut).                                | AAF71254.1 |  | Q9M5L3                     |               |
| Eukaryota | Resveratrol synthase 3                | 2.3.1.95 | <i>Arachis hypogaea</i> (Peanut).                                | AAF71253.1 |  | Q9M5L4                     |               |
| Eukaryota | Resveratrol synthase 3                |          | <i>Arachis hypogaea</i> (Peanut).                                | AAZ32262.1 |  | Q45L50 [T]                 |               |



|           |                                   |          |                                       |                                          |  |                         |            |
|-----------|-----------------------------------|----------|---------------------------------------|------------------------------------------|--|-------------------------|------------|
| Eukaryota | Trihydroxystilbene synthase 1     | 2.3.1.95 | Arachis hypogaea (Peanut).            | CAA00091.1,<br>CAA44184.1,<br>CAA44185.1 |  | P20178 [T],<br>P20178.1 |            |
| Eukaryota | Stilbene synthase                 |          | Arachis hypogaea (Peanut).            | ADJ17764.1,<br>BAA78617.1                |  | Q9SLV5 [P]              | 1Z1E, 1Z1F |
| Eukaryota | Stilbene synthase                 |          | Arachis hypogaea (Peanut).            | ADJ17764.1,<br>BAA78617.1                |  | Q9SLV5 [P]              | 1Z1E, 1Z1F |
| Eukaryota | Resveratrol synthase              |          | Arachis hypogaea (Peanut).            | ABY86219.1                               |  | BOLX54                  |            |
| Eukaryota | Trihydroxystilbene synthase 2     | 2.3.1.95 | Arachis hypogaea (Peanut).            | CAA44186.1                               |  | P20077,<br>P20077.1     |            |
| Eukaryota | Trihydroxystilbene synthase 2     | 2.3.1.95 | Arachis hypogaea (Peanut).            | CAA44186.1                               |  | P20077,<br>P20077.1     |            |
| Eukaryota | Trihydroxystilbene synthase 3     | 2.3.1.95 | Arachis hypogaea (Peanut).            | AAA96434.1                               |  | P51069 [T],<br>P51069.1 |            |
| Eukaryota | Stilbene synthase                 | 2.3.1.95 | Arachis hypogaea (Peanut).            | AAX32891.1,<br>ABR10844.1                |  | Q2VT95 [T]              |            |
| Eukaryota | resveratrol synthase              |          | Arachis hypogaea                      | ADJ17766.1                               |  |                         |            |
| Eukaryota | resveratrol synthase              |          | Arachis hypogaea                      | ADJ17767.1                               |  |                         |            |
| Eukaryota | resveratrol synthase              |          | Arachis hypogaea                      | ADJ17765.1                               |  |                         |            |
| Eukaryota | resveratrol synthase              |          | Arachis hypogaea                      | ADJ17768.1                               |  |                         |            |
| Eukaryota | Stilbenecarboxylate synthase      | 2.3.1.-  | Hydrangea macrophylla (Bignoniaceae). | AAN76182.1                               |  | Q8GZP4 [T]              |            |
| Eukaryota | Coumaroyl triacetic acid synthase |          | Hydrangea macrophylla (Bignoniaceae). | BAA32733.1                               |  | O82145 [T]              |            |

|           |                                                                         |         |                                             |            |                |            |
|-----------|-------------------------------------------------------------------------|---------|---------------------------------------------|------------|----------------|------------|
|           |                                                                         | 2.3.1.- |                                             |            |                |            |
| Eukaryota | Stilbenecarboxylate synthase                                            |         | Hydrangea macrophylla (Bingleaf hydrangea). | AAN76183.1 |                | Q8GZP3     |
| Eukaryota | PREDICTED: hypothetical protein                                         |         | Vitis vinifera                              |            | XP_002264455.1 |            |
| Eukaryota | Whole genome shotgun sequence of line PN40024, scaffold_100.assembly12x |         | Vitis vinifera (Grape).                     | CBI31796.3 |                | D7TMS3     |
| Eukaryota | Putative uncharacterized protein                                        |         | Vitis vinifera (Grape).                     | CAN64419.1 |                | A5CBN6     |
| Eukaryota | Whole genome shotgun sequence of line PN40024, scaffold_100.assembly12x |         | Vitis vinifera (Grape).                     | CBI31795.3 |                | D7TMS2     |
| Eukaryota | Putative uncharacterized protein                                        |         | Vitis vinifera (Grape).                     | CAN68597.1 |                | A5C3F5     |
| Eukaryota | Putative uncharacterized protein                                        |         | Vitis vinifera (Grape).                     | CAN61105.1 |                | A5B8I0     |
| Eukaryota | PREDICTED: hypothetical protein                                         |         | Vitis vinifera                              |            | XP_002271371.1 |            |
| Eukaryota | PREDICTED: hypothetical protein, partial                                |         | Vitis vinifera                              |            | XP_002272129.1 |            |
| Eukaryota | Stilbene synthase                                                       |         | Vitis pseudoreticulata.                     | ABF06881.1 |                | Q1KTA7 [T] |
| Eukaryota | Putative uncharacterized protein                                        |         | Vitis vinifera (Grape).                     | CAN72347.1 |                | A5BHV2     |
| Eukaryota | PREDICTED: hypothetical protein                                         |         | Vitis vinifera                              |            | XP_002278299.1 |            |
| Eukaryota | Whole genome shotgun sequence of line PN40024, scaffold_100.assembly12x |         | Vitis vinifera (Grape).                     | CBI31809.3 |                | D7TMT6     |
| Eukaryota | Whole genome shotgun sequence of line PN40024, scaffold_100.assembly12x |         | Vitis vinifera (Grape).                     | CBI31804.3 |                | D7TMT1     |

|           |                                                                         |          |                         |            |                                   |                     |  |
|-----------|-------------------------------------------------------------------------|----------|-------------------------|------------|-----------------------------------|---------------------|--|
| Eukaryota | Whole genome shotgun sequence of line PN40024, scaffold_100.assembly12x |          | Vitis vinifera (Grape). | CBI31800.3 |                                   | D7TMS7              |  |
| Eukaryota | PREDICTED: hypothetical protein                                         |          | Vitis vinifera          |            | XP_002264989.1                    |                     |  |
| Eukaryota | Putative uncharacterized protein                                        |          | Vitis vinifera (Grape). | CAN69969.1 |                                   | A5BBF2              |  |
| Eukaryota | Putative uncharacterized protein                                        |          | Vitis vinifera (Grape). | CAN68070.1 |                                   | A5BLU6              |  |
| Eukaryota | Whole genome shotgun sequence of line PN40024, scaffold_100.assembly12x |          | Vitis vinifera (Grape). | CBI31801.3 |                                   | D7TMS8              |  |
| Eukaryota | Whole genome shotgun sequence of line PN40024, scaffold_100.assembly12x |          | Vitis vinifera (Grape). | CBI31806.3 |                                   | D7TMT3              |  |
| Eukaryota | PREDICTED: hypothetical protein                                         |          | Vitis vinifera          |            | XP_002265378.1                    |                     |  |
| Eukaryota | PREDICTED: hypothetical protein                                         |          | Vitis vinifera          |            | XP_002268676.1,<br>XP_002272695.1 |                     |  |
| Eukaryota | Stilbene synthase                                                       |          | Vitis pseudoreticulata. | ABF06885.1 |                                   | Q1KTA3 [T]          |  |
| Eukaryota | Stilbene synthase                                                       |          | Vitis pseudoreticulata. | ABF06883.1 |                                   | Q1KTA5 [T]          |  |
| Eukaryota | Trihydroxystilbene synthase 4                                           | 2.3.1.95 | Vitis vinifera (Grape). | CAN82080.1 | XP_002269293.1                    | A5AEM3,<br>A5AEM3.1 |  |
| Eukaryota | Whole genome shotgun sequence of line PN40024, scaffold_100.assembly12x |          | Vitis vinifera (Grape). | CBI31805.3 |                                   | D7TMT2              |  |
| Eukaryota | Putative uncharacterized protein                                        |          | Vitis vinifera (Grape). | CAN62494.1 |                                   | A5AHW2              |  |
| Eukaryota | Putative uncharacterized protein                                        |          | Vitis vinifera (Grape). | CAN72348.1 |                                   | A5BHV3              |  |

|           |                                          |  |                                                 |            |                |            |
|-----------|------------------------------------------|--|-------------------------------------------------|------------|----------------|------------|
| Eukaryota | PREDICTED: hypothetical protein, partial |  | Vitis vinifera                                  |            | XP_002265652.1 |            |
| Eukaryota | Putative uncharacterized protein         |  | Vitis vinifera (Grape).                         | CAN62671.1 |                | A5APC2     |
| Eukaryota | Stilbene synthase 3                      |  | Vitis sp. cv. 'Norton'.                         | AAL23576.1 |                | Q93YX5     |
| Eukaryota | Stilbene synthase                        |  | Parthenocissus henryana.                        | AAM21771.1 |                | Q8LPP4 [T] |
| Eukaryota | Stilbene synthase                        |  | Parthenocissus quinquefolia (Virginia creeper). | AAM21773.1 |                | Q8LPP2 [T] |
| Eukaryota | Stilbene synthase                        |  | Cissus rhombifolia (Grape ivy).                 | AAM21772.1 |                | Q8LPP3 [T] |
| Eukaryota | Stilbene synthase 2                      |  | Vitis rotundifolia (Muscadine grape).           | ABL09496.1 |                | A1E5L9     |
| Eukaryota | Stilbene synthase                        |  | Vitis vinifera (Grape).                         | ABD64686.1 |                | A3QRB9 [T] |
| Eukaryota | Stilbene synthase 2                      |  | Vitis vinifera (Grape).                         | ABJ97072.1 |                | A0FDZ9     |
| Eukaryota | Putative uncharacterized protein         |  | Vitis vinifera (Grape).                         | CAN69608.1 |                | A5B2F6     |
| Eukaryota | Stilbene synthase 2                      |  | Vitis pseudoreticulata.                         | ACO59913.1 |                | C1KH63     |
| Eukaryota | Stilbene synthase                        |  | Vitis quinquangularis.                          | ABM30194.1 |                | A1Z1Q0 [T] |
| Eukaryota | PREDICTED: hypothetical protein          |  | Vitis vinifera                                  |            | XP_002263807.1 |            |
| Eukaryota | Putative uncharacterized protein         |  | Vitis vinifera (Grape).                         | CAN82569.1 |                | A5ATB0     |

|           |                                  |          |                         |            |                |                         |
|-----------|----------------------------------|----------|-------------------------|------------|----------------|-------------------------|
| Eukaryota | PREDICTED: hypothetical protein  |          | Vitis vinifera          |            | XP_002264035.1 |                         |
| Eukaryota | Stilbene synthase                |          | Vitis vinifera (Grape). | ABJ97068.1 |                | A0FDZ5                  |
| Eukaryota | Stilbene synthase 2              |          | Vitis sp. cv. 'Norton'. | AAL09047.1 |                | Q944W7                  |
| Eukaryota | PREDICTED: hypothetical protein  |          | Vitis vinifera          |            | XP_002263722.1 |                         |
| Eukaryota | PREDICTED: hypothetical protein  |          | Vitis vinifera          |            | XP_002263881.1 |                         |
| Eukaryota | PREDICTED: hypothetical protein  |          | Vitis vinifera          |            | XP_002265229.1 |                         |
| Eukaryota | Stilbene synthase 1              |          | Vitis pseudoreticulata. | ACO59912.1 |                | C1KH62                  |
| Eukaryota | Stilbene synthase                |          | Vitis quinquangularis.  | ABM30193.1 |                | A1Z1P9 [T]              |
| Eukaryota | Stilbene synthase 2              |          | Vitis vinifera (Grape). | ACO59459.1 |                | C1KKJ9                  |
| Eukaryota | PSV368                           | 2.3.1.95 | Vitis vinifera (Grape). |            |                | P51071 [T],<br>P51071.1 |
| Eukaryota | Stilbene synthase                |          | Vitis vinifera (Grape). | ABV82966.1 |                | A8I4W6 [T]              |
| Eukaryota | PREDICTED: hypothetical protein  |          | Vitis vinifera          |            | XP_002278483.1 |                         |
| Eukaryota | Stilbene synthase                |          | Vitis pseudoreticulata. | ABF06884.1 |                | Q1KTA4 [T]              |
| Eukaryota | Putative uncharacterized protein |          | Vitis vinifera (Grape). | CAN61161.1 |                | A5BAS8                  |

|           |                                                                         |          |                                              |                                                         |                                   |                         |  |
|-----------|-------------------------------------------------------------------------|----------|----------------------------------------------|---------------------------------------------------------|-----------------------------------|-------------------------|--|
| Eukaryota | Putative uncharacterized protein                                        |          | Vitis vinifera (Grape).                      | CAN81926.1                                              |                                   | A5C7S2                  |  |
| Eukaryota | Stilbene synthase                                                       |          | Vitis pseudoreticulata.                      | ABF06882.1                                              |                                   | Q1KTA6 [T]              |  |
| Eukaryota | Stilbene synthase 1                                                     |          | Vitis vinifera (Grape).                      | ABJ97071.1                                              |                                   | A0FDZ8                  |  |
| Eukaryota | Whole genome shotgun sequence of line PN40024, scaffold_100.assembly12x |          | Vitis vinifera (Grape).                      | CBI31811.3                                              | XP_002278385.1                    | D7TMT8                  |  |
| Eukaryota | Stilbene synthase                                                       |          | Vitis rotundifolia (Muscadine grape).        | ABK96920.1                                              |                                   | A1DZF2                  |  |
| Eukaryota | Stilbene synthase                                                       |          | Vitis vinifera (Grape).                      | ABD64685.1                                              |                                   | A3QRB8 [T]              |  |
| Eukaryota | Stilbene synthase                                                       |          | Vitis pseudoreticulata.                      | ABF06886.1                                              |                                   | Q1KTA2 [T]              |  |
| Eukaryota | PSV21                                                                   | 2.3.1.95 | Vitis vinifera (Grape).                      | AAB19887.2,<br>CAA54221.1,<br>CAN68069.1,<br>CAN69968.1 | XP_002265332.1,<br>XP_002268842.1 | P51070 [T],<br>P51070.2 |  |
| Eukaryota | Resveratrol synthase                                                    |          | Vitis vinifera (Grape).                      | ABC84859.1                                              |                                   | Q2HY10 [T]              |  |
| Eukaryota | Stilbene synthase                                                       |          | Vitis riparia (Frost grape) (Vitis vulpina). | AAF00586.1                                              |                                   | Q9SPW2                  |  |
| Eukaryota | PREDICTED: hypothetical protein                                         |          | Vitis vinifera                               |                                                         | XP_002265148.1                    |                         |  |
| Eukaryota | Stilbene synthase 1                                                     |          | Vitis vinifera (Grape).                      | ACO59456.1                                              |                                   | C1KKJ6                  |  |
| Eukaryota | Resveratrol synthase                                                    |          | Vitis vinifera (Grape).                      | ABE68894.1,<br>ABE68895.1                               |                                   | Q1PA47 [T]              |  |

|           |                                                                         |          |                                              |                           |                                   |                                |  |
|-----------|-------------------------------------------------------------------------|----------|----------------------------------------------|---------------------------|-----------------------------------|--------------------------------|--|
| Eukaryota | Putative uncharacterized protein                                        |          | Vitis vinifera (Grape).                      | CAN74316.1                |                                   | A5B9E3                         |  |
| Eukaryota | Whole genome shotgun sequence of line PN40024, scaffold_100.assembly12x | 2.3.1.95 | Vitis vinifera (Grape).                      | CAN77746.1,<br>CBI31810.3 | XP_002278354.1                    | A5C9M2,<br>A5C9M2.1,<br>D7TMT7 |  |
| Eukaryota | PREDICTED: hypothetical protein                                         |          | Vitis vinifera                               |                           | XP_002268756.1,<br>XP_002269386.1 |                                |  |
| Eukaryota | Stilbene synthase 1                                                     |          | Vitis vinifera (Grape).                      | ACO59458.1                |                                   | C1KKJ8                         |  |
| Eukaryota | Stilbene synthase 2                                                     |          | Vitis vinifera (Grape).                      | ACO59457.1                |                                   | C1KKJ7                         |  |
| Eukaryota | Stilbene synthase                                                       | 2.3.1.95 | Vitis amurensis.                             | ACS34990.1                |                                   | C6K7X5 [T]                     |  |
| Eukaryota | Stilbene synthase 1                                                     |          | Vitis sp. cv. 'Norton'.                      | AAL09046.1                |                                   | Q944W8                         |  |
| Eukaryota | Resveratrol synthase                                                    |          | Vitis vinifera (Grape).                      | AAK69395.1                |                                   | Q94G58 [T]                     |  |
| Eukaryota | Stilbene synthase                                                       |          | Vitis labrusca.                              | BAB20979.1                |                                   | Q9FEK7                         |  |
| Eukaryota | Stilbene synthase                                                       |          | Vitis riparia (Frost grape) (Vitis vulpina). | BAB20978.1                |                                   | Q9FRW2                         |  |
| Eukaryota | Resveratrol synthase                                                    |          | Vitis rotundifolia (Muscadine grape).        | ACM47246.1                |                                   | B9VS72 [T]                     |  |
| Eukaryota | PREDICTED: hypothetical protein                                         |          | Vitis vinifera                               |                           | XP_002262654.1                    |                                |  |
| Eukaryota | Whole genome shotgun sequence of line PN40024, scaffold_100.assembly12x |          | Vitis vinifera (Grape).                      | CBI31790.3                |                                   | D7TMR7                         |  |
| Eukaryota | Putative uncharacterized protein                                        |          | Vitis vinifera (Grape).                      | CAN76086.1                |                                   | A5AVC4                         |  |

|           |                                      |           |                                                         |                                                         |                |                         |                     |
|-----------|--------------------------------------|-----------|---------------------------------------------------------|---------------------------------------------------------|----------------|-------------------------|---------------------|
| Eukaryota | Trihydroxystilbene synthase 6        | 2.3.1.95  | Vitis vinifera (Grape).                                 | ABM67587.1                                              | XP_002262944.1 | A2ICC6 [T],<br>A2ICC6.1 |                     |
| Eukaryota | PSV25                                | 2.3.1.95  | Vitis vinifera (Grape).                                 | ABC84860.1,<br>BAB20980.1,<br>CAN60215.1                | XP_002263962.1 | P28343 [P],<br>P28343.2 |                     |
| Eukaryota | Resveratrol synthase                 | 2.3.1.95  | Vitis vinifera (Grape).                                 | ACN81821.1                                              |                | COLUU8 [T]              |                     |
| Eukaryota | Naringenin-chalcone synthase F       | 2.3.1.74  | Petunia hybrida (Petunia).                              | CAA32734.1                                              |                | P22926 [T],<br>P22926.2 |                     |
| Eukaryota | Naringenin-chalcone synthase         | 2.3.1.74  | Equisetum arvense (Field horsetail) (Common horsetail). | BAA89501.1                                              |                | Q9MBB1 [T],<br>Q9MBB1.1 |                     |
| Eukaryota | Putative uncharacterized protein     |           | Picea sitchensis (Sitka spruce).                        | ABR17893.1                                              |                | B8LQG3 [T]              |                     |
| Eukaryota | Stilbene synthase 1                  | 2.3.1.-   | Pinus strobus (Eastern white pine).                     | CAA87012.1                                              |                | P48407 [P],<br>P48407.1 |                     |
| Eukaryota | Stilbene synthase 2                  | 2.3.1.-   | Pinus strobus (Eastern white pine).                     | CAA87013.1                                              |                | P48408 [T],<br>P48408.1 |                     |
| Eukaryota | Pinosylvin synthase                  | 2.3.1.146 | Pinus densiflora (Japanese red pine).                   | BAA89667.1                                              |                | Q9MBB0 [T]              |                     |
| Eukaryota | Pinosylvin-forming stilbene synthase | 2.3.1.-   | Pinus sylvestris (Scots pine).                          | AAA50524.1,<br>AAA50525.1,<br>AAB24341.2,<br>CAA43165.1 |                | Q02323 [P],<br>Q02323.1 | 1U0U,<br>1XES, 1XET |
| Eukaryota | Pinosylvin synthase                  |           | Pinus densiflora (Japanese red pine).                   | BAA94593.1                                              |                | Q9MBF1 [T]              |                     |
| Eukaryota | Pinosylvin-forming stilbene synthase |           | Pinus massoniana.                                       | ABG91049.1                                              |                | Q0Q4L4 [T]              |                     |
| Eukaryota | Pinosylvin-forming stilbene synthase |           | Pinus massoniana.                                       | ABG91050.1                                              |                | Q0Q4L3                  |                     |



|           |                                              |          |                                              |                                          |                |                         |
|-----------|----------------------------------------------|----------|----------------------------------------------|------------------------------------------|----------------|-------------------------|
| Eukaryota | Naringenin-chalcone synthase                 |          | Elaeis oleifera (Oil palm).                  | ABS76146.1                               |                | A7LP06 [T]              |
| Eukaryota | Naringenin-chalcone synthase 2               | 2.3.1.74 | Hordeum vulgare (Barley).                    | CAA70435.1                               |                | Q96562 [T],<br>Q96562.1 |
| Eukaryota | Naringenin-chalcone synthase D               | 2.3.1.74 | Petunia hybrida (Petunia).                   | CAA32733.1                               |                | P22925,<br>P22925.2     |
| Eukaryota | Chalcone synthase                            | 2.3.1.74 | Petunia hybrida (Petunia).                   | CAA32736.1                               |                | Q43041                  |
| Eukaryota | Putative chalcone synthase                   |          | Oryza sativa subsp. japonica (Rice).         | BAC20662.1,<br>BAF21101.1,<br>EAZ03224.1 | NP_001059187.1 | A2YJG3,<br>Q8H4L3       |
| Eukaryota | Chalcone synthase                            |          | Lupinus luteus (European yellow lupin).      | ABF59869.1                               |                | Q1G1M1                  |
| Eukaryota | Putative uncharacterized protein Sb07g004700 |          | Sorghum bicolor (Sorghum) (Sorghum vulgare). | AAL49965.1,<br>EES14634.1                | XP_002445139.1 | Q8VWQ7<br>[T]           |
| Eukaryota | Putative uncharacterized protein             |          | Picea sitchensis (Sitka spruce).             | ABK24577.1                               |                | A9NVB6 [T]              |
| Eukaryota | Chalcone synthase                            |          | Ginkgo biloba (Ginkgo).                      | AAY52458.1                               |                | Q4TVM8<br>[T]           |
| Eukaryota | Chalcone synthase                            |          | Ginkgo biloba (Ginkgo).                      | AAY16976.1                               |                | A4D0J7                  |
| Eukaryota | Chalcone synthase-like protein               | 2.3.1.74 | Pinus strobus (Eastern white pine).          | CAA05214.1                               |                | O65873 [T]              |
| Eukaryota | Chalcone synthase                            |          | Ginkgo biloba (Ginkgo).                      | AAS21057.1,<br>AAT68477.1,<br>ABZ04126.1 |                | Q6RIB2 [T]              |
| Eukaryota | Naringenin-chalcone synthase                 | 2.3.1.74 | Pinus strobus (Eastern white pine).          | CAA06077.1                               |                | O65872 [T],<br>O65872.1 |
| Eukaryota | Pinocembrin chalcone synthase                |          | Pinus densiflora (Japanese red pine).        | BAA94594.1                               |                | Q9MBF0<br>[T]           |

|           |                                  |          |                                               |                                          |  |            |  |
|-----------|----------------------------------|----------|-----------------------------------------------|------------------------------------------|--|------------|--|
| Eukaryota | Chalcone synthase                |          | Pinus pinaster (Maritime pine).               | AAN87169.1                               |  | Q8GUU5 [T] |  |
| Eukaryota | Chalcone synthase                | 2.3.1.74 | Pinus pinaster (Maritime pine).               | CAP09644.1                               |  | A8E1V8     |  |
| Eukaryota | Chalcone synthase                |          | Pinus pinaster (Maritime pine).               | AAP85249.1                               |  | Q7XJC5 [T] |  |
| Eukaryota | Chalcone synthase                |          | Pinus pinaster (Maritime pine).               | AAN87170.1                               |  | Q8GUU4 [T] |  |
| Eukaryota | Putative uncharacterized protein |          | Picea sitchensis (Sitka spruce).              | ABK27123.1                               |  | A9P2L2 [T] |  |
| Eukaryota | Putative uncharacterized protein |          | Picea sitchensis (Sitka spruce).              | ABK24675.1                               |  | A9NVL4 [T] |  |
| Eukaryota | Chalcone synthase                |          | Picea abies (Norway spruce) (Picea excelsa).  | ABD24228.1                               |  | Q2ENC0     |  |
| Eukaryota | Putative uncharacterized protein |          | Picea sitchensis (Sitka spruce).              | ABK25158.1                               |  | A9NWZ7 [T] |  |
| Eukaryota | Putative uncharacterized protein |          | Picea sitchensis (Sitka spruce).              | ABK23800.1                               |  | A9NT39 [T] |  |
| Eukaryota | Chalcone synthase                |          | Abies alba (Edeltanne) (European silver fir). | ABD24244.1                               |  | Q2ENA3     |  |
| Eukaryota | Chalcone synthase                |          | Abies alba (Edeltanne) (European silver fir). | ABD38611.1,<br>ABD38614.1,<br>ABD38616.1 |  | Q2EFI2     |  |
| Eukaryota | Chalcone synthase                |          | Abies alba (Edeltanne) (European silver fir). | ABD24253.1                               |  | Q2EN94     |  |
| Eukaryota | Chalcone synthase                |          | Abies alba (Edeltanne) (European silver fir). | ABD24231.1                               |  | Q2ENB6     |  |
| Eukaryota | Chalcone synthase                |          | Abies alba (Edeltanne) (European silver fir). | ABD38607.1,<br>ABD38612.1                |  | Q2EFI4     |  |

|           |                                  |          |                                               |                                                                        |  |                     |  |
|-----------|----------------------------------|----------|-----------------------------------------------|------------------------------------------------------------------------|--|---------------------|--|
| Eukaryota | Chalcone synthase                |          | Abies alba (Edeltanne) (European silver fir). | ABD38609.1,<br>ABD38615.1                                              |  | Q2EF11              |  |
| Eukaryota | Chalcone synthase                |          | Abies alba (Edeltanne) (European silver fir). | ABD24232.1,<br>ABD24242.1,<br>ABD24254.1                               |  | Q2ENA5              |  |
| Eukaryota | Chalcone synthase                |          | Abies alba (Edeltanne) (European silver fir). | ABD38606.1                                                             |  | Q2EFJ0              |  |
| Eukaryota | Chalcone synthase                |          | Abies alba (Edeltanne) (European silver fir). | ABD24229.1,<br>ABD24237.1,<br>ABD38601.1,<br>ABD38605.1                |  | Q2ENB0              |  |
| Eukaryota | Chalcone synthase                |          | Abies alba (Edeltanne) (European silver fir). | ABD24245.1,<br>ABD24246.1,<br>ABD24250.1,<br>ABD24252.1,<br>ABD38592.1 |  | Q2ENA1              |  |
| Eukaryota | Chalcone synthase                |          | Abies alba (Edeltanne) (European silver fir). | ABD24247.1,<br>ABD38594.1                                              |  | Q2EFK2              |  |
| Eukaryota | Chalcone synthase                |          | Abies alba (Edeltanne) (European silver fir). | ABD38599.1                                                             |  | Q2EFJ7              |  |
| Eukaryota | Chalcone synthase                |          | Abies alba (Edeltanne) (European silver fir). | ABD24239.1                                                             |  | Q2ENA8              |  |
| Eukaryota | Naringenin-chalcone synthase     | 2.3.1.74 | Pinus sylvestris (Scots pine).                | CAA43166.1                                                             |  | P30079,<br>P30079.1 |  |
| Eukaryota | Chalcone synthase                |          | Pseudotsuga menziesii (Douglas-fir).          | ABD24227.1                                                             |  | Q2ENC1              |  |
| Eukaryota | Chalcone synthase                |          | Abies alba (Edeltanne) (European silver fir). | ABD24236.1                                                             |  | Q2ENB1              |  |
| Eukaryota | Putative uncharacterized protein |          | Picea sitchensis (Sitka spruce).              | ABK25266.1                                                             |  | A9NXA5 [T]          |  |
| Eukaryota | Chalcone synthase                |          | Abies alba (Edeltanne) (European silver fir). | ABD38598.1                                                             |  | Q2EFJ8              |  |

|           |                                  |          |                                               |                                                                                                                                                                                 |  |                            |
|-----------|----------------------------------|----------|-----------------------------------------------|---------------------------------------------------------------------------------------------------------------------------------------------------------------------------------|--|----------------------------|
| Eukaryota | Chalcone synthase                |          | Abies alba (Edeltanne) (European silver fir). | ABD24249.1,<br>ABD24255.1                                                                                                                                                       |  | Q2EN92                     |
| Eukaryota | Chalcone synthase                |          | Abies alba (Edeltanne) (European silver fir). | ABD24233.1                                                                                                                                                                      |  | Q2ENB4                     |
| Eukaryota | Chalcone synthase                |          | Abies alba (Edeltanne) (European silver fir). | ABD38610.1                                                                                                                                                                      |  | Q2EF16                     |
| Eukaryota | Chalcone synthase                |          | Abies alba (Edeltanne) (European silver fir). | ABD24235.1                                                                                                                                                                      |  | Q2ENB2                     |
| Eukaryota | Chalcone synthase                |          | Abies alba (Edeltanne) (European silver fir). | ABD24234.1                                                                                                                                                                      |  | Q2ENB3                     |
| Eukaryota | Putative uncharacterized protein |          | Picea sitchensis (Sitka spruce).              | ABK23777.1,<br>ABK25228.1                                                                                                                                                       |  | A9NT16 [T]                 |
| Eukaryota | Putative uncharacterized protein |          | Picea sitchensis (Sitka spruce).              | ABK25340.1                                                                                                                                                                      |  | A9NXH9 [T]                 |
| Eukaryota | Putative uncharacterized protein |          | Picea sitchensis (Sitka spruce).              | ABK24876.1                                                                                                                                                                      |  | A9NW65<br>[T]              |
| Eukaryota | Naregenin-chalcone synthase 7    | 2.3.1.74 | Picea mariana (Black spruce).                 | AAF35890.1                                                                                                                                                                      |  | Q9M5M0<br>[T],<br>Q9M5M0.1 |
| Eukaryota | Chalcone synthase                |          | Abies alba (Edeltanne) (European silver fir). | ABD38604.1                                                                                                                                                                      |  | Q2EFJ2                     |
| Eukaryota | Chalcone synthase                |          | Abies alba (Edeltanne) (European silver fir). | ABD24230.1,<br>ABD24238.1,<br>ABD24240.1,<br>ABD24241.1,<br>ABD24243.1,<br>ABD24248.1,<br>ABD38597.1,<br>ABD38600.1,<br>ABD38602.1,<br>ABD38603.1,<br>ABD38608.1,<br>ABD38613.1 |  | Q2ENA9 [T]                 |

|           |                                  |  |                                                      |                                                                        |  |            |
|-----------|----------------------------------|--|------------------------------------------------------|------------------------------------------------------------------------|--|------------|
| Eukaryota | Chalcone synthase                |  | <i>Abies alba</i> (Edeltanne) (European silver fir). | ABD38596.1                                                             |  | Q2EFK0     |
| Eukaryota | Chalcone synthase                |  | <i>Abies alba</i> (Edeltanne) (European silver fir). | ABD38595.1                                                             |  | Q2EFK1     |
| Eukaryota | Chalcone synthase                |  | <i>Abies alba</i> (Edeltanne) (European silver fir). | ABD24251.1,<br>ABD38593.1                                              |  | Q2EFK3     |
| Eukaryota | Putative uncharacterized protein |  | <i>Picea sitchensis</i> (Sitka spruce).              | ABK21072.1                                                             |  | A9NKB1 [T] |
| Eukaryota | Putative uncharacterized protein |  | <i>Picea sitchensis</i> (Sitka spruce).              | ABR16506.1                                                             |  | B8LLH6 [T] |
| Eukaryota | Putative uncharacterized protein |  | <i>Picea sitchensis</i> (Sitka spruce).              | ABK25177.1                                                             |  | A9NX16 [T] |
| Eukaryota | Putative uncharacterized protein |  | <i>Picea sitchensis</i> (Sitka spruce).              | ABR16308.1,<br>ABR16692.1,<br>ABR18409.1,<br>ACN40699.1,<br>ACN40839.1 |  | B8LKX8 [T] |
| Eukaryota | Putative chalcone synthase A     |  | <i>Allium cepa</i> (Onion).                          | AAO63020.1                                                             |  | Q84TM4 [T] |
| Eukaryota | Chalcone synthase B              |  | <i>Allium cepa</i> (Onion).                          | AAO63021.1                                                             |  | Q84TM3 [T] |
| Eukaryota | Chalcone synthase                |  | <i>Iris hollandica</i> (Dutch iris).                 | BAF99252.1                                                             |  | A9ZTK6 [T] |
| Eukaryota | Chalcone synthase                |  | <i>Iris hollandica</i> (Dutch iris).                 | BAF99253.1                                                             |  | A9ZTK7 [T] |
| Eukaryota | Chalcone synthase                |  | <i>Iris hollandica</i> (Dutch iris).                 | BAE80115.1                                                             |  | Q2ABX7 [T] |
| Eukaryota | Chalcone synthase                |  | <i>Oncidium Gower Ramsey</i> .                       | ABS58499.1                                                             |  | A7KT13 [T] |

|           |                              |          |                                                                                     |                           |  |                         |
|-----------|------------------------------|----------|-------------------------------------------------------------------------------------|---------------------------|--|-------------------------|
| Eukaryota | Chalcone synthetase          |          | <i>Stellaria longipes</i> (Longstalk starwort).                                     | AAM18138.1                |  | Q8S2T6 [T]              |
| Eukaryota | Chalcone synthase            |          | <i>Gypsophila paniculata</i> .                                                      | AAP74755.1                |  | Q7XYS4 [T]              |
| Eukaryota | Naringenin-chalcone synthase | 2.3.1.74 | <i>Dianthus caryophyllus</i> (Carnation) (Clove pink).                              | CAA91923.1                |  | P48389 [T],<br>P48389.1 |
| Eukaryota | Naringenin-chalcone synthase | 2.3.1.74 | <i>Dianthus monspessulanus</i> .                                                    | AAF81743.1                |  | Q9LKP7 [T],<br>Q9LKP7.1 |
| Eukaryota | Chalcone synthase 1          |          | <i>Rheum palmatum</i> .                                                             | ABB13607.1                |  | A8CLG3 [T]              |
| Eukaryota | CHS2                         |          | <i>Polygonum cuspidatum</i> (Japanese knotweed).                                    | ACC76754.1                |  | B2MWQ9<br>[T]           |
| Eukaryota | Chalcone synthase            | 2.3.1.74 | <i>Fagopyrum esculentum</i> (Common buckwheat)<br>( <i>Fagopyrum vulgare</i> ).     | ACZ51476.1                |  | D1MJ11 [T]              |
| Eukaryota | Chalcone synthase            | 2.3.1.74 | <i>Fagopyrum dibotrys</i> .                                                         | ACZ48699.1                |  | D1MIB1                  |
| Eukaryota | Chalcone synthase            |          | <i>Fagopyrum tataricum</i> (Tartarian buckwheat)<br>( <i>Polygonum tataricum</i> ). | ADH03587.1                |  | D7R4L1                  |
| Eukaryota | Chalcone synthase            | 2.3.1.74 | <i>Fagopyrum tataricum</i> (Tartarian buckwheat)<br>( <i>Polygonum tataricum</i> ). | ACZ51475.1,<br>ADL39795.1 |  | D1MJ10                  |
| Eukaryota | Chalcone synthase            |          | <i>Fagopyrum tataricum</i> (Tartarian buckwheat)<br>( <i>Polygonum tataricum</i> ). | ACH70135.1                |  | D7EZN4 [T]              |
| Eukaryota | Chalcone synthase 2          |          | <i>Rheum palmatum</i> .                                                             | ABB13608.1                |  | A8CLH4 [T]              |
| Eukaryota | Chalcone synthase            |          | <i>Polygonum cuspidatum</i> (Japanese knotweed).                                    | ABK92281.2                |  | A1E025                  |
| Eukaryota | Chalcone synthase            |          | <i>Polygonum cuspidatum</i> (Japanese knotweed).                                    | ABK92282.2                |  | A1E0A0 [T]              |

|           |                                |          |                                               |                           |  |                         |
|-----------|--------------------------------|----------|-----------------------------------------------|---------------------------|--|-------------------------|
| Eukaryota | Chalcone synthase              | 2.3.1.74 | Phalaenopsis hybrid cultivar.                 | AAY83389.1                |  | Q45XN8                  |
| Eukaryota | Naringenin-chalcone synthase 8 | 2.3.1.74 | Bromheadia finlaysoniana (Orchid).            | AAB62876.1                |  | O23731 [T],<br>O23731.1 |
| Eukaryota | Naringenin-chalcone synthase 4 | 2.3.1.74 | Bromheadia finlaysoniana (Orchid).            | AAB62875.1                |  | O23730 [T],<br>O23730.1 |
| Eukaryota | Naringenin-chalcone synthase 3 | 2.3.1.74 | Bromheadia finlaysoniana (Orchid).            | AAB62874.1                |  | O23729 [T],<br>O23729.1 |
| Eukaryota | Chalcone synthase              |          | Dendrobium nobile.                            | ABE77392.2                |  | Q1KPV3 [T]              |
| Eukaryota | Chalcone synthase              |          | Dendrobium sp. RW-2006-1.                     | CAL15003.1                |  | Q0VTQ6 [T]              |
| Eukaryota | Chalcone synthase              |          | Dendrobium hybrid cultivar.                   | CAR64527.1,<br>CAR64528.1 |  | B5MBV4 [T]              |
| Eukaryota | Chalcone synthase enzyme       |          | Dendrobium hybrid cultivar.                   | CAM32716.1                |  | A2RQ47 [T]              |
| Eukaryota | Chalcone synthase              |          | Dendrobium hybrid cultivar.                   | AAU93767.1                |  | Q5XQ44 [T]              |
| Eukaryota | Naringenin-chalcone synthase 9 | 2.3.1.74 | Daucus carota (Carrot).                       | BAA03785.1                |  | Q9SB26 [T],<br>Q9SB26.1 |
| Eukaryota | Chalcone synthase              | 2.3.1.74 | Daucus carota (Carrot).                       | BAA03784.1                |  | Q9SB27                  |
| Eukaryota | DcCHS1                         | 2.3.1.74 | Daucus carota (Carrot).                       | CAA07244.1                |  | Q9ZS41 [T],<br>Q9ZS41.1 |
| Eukaryota | Chalcone synthase              |          | Brassica oleracea (Wild cabbage).             | AAO73441.1                |  | Q84V00 [T]              |
| Eukaryota | Chalcone synthase              |          | Aethionema grandiflora (Persian stone-cress). | AAF23557.1                |  | Q9SEP5                  |

|           |                   |  |                                                                                         |            |  |        |  |
|-----------|-------------------|--|-----------------------------------------------------------------------------------------|------------|--|--------|--|
| Eukaryota | Chalcone synthase |  | <i>Arabis brassica</i> (Rock-cress) ( <i>Arabis pauciflora</i> ).                       | AAF23577.1 |  | Q9SENO |  |
| Eukaryota | Chalcone synthase |  | <i>Microthlaspi perfoliatum</i> (Claspleaf penny-cress) ( <i>Thlaspi perfoliatum</i> ). | AAG43354.1 |  | Q9FR71 |  |
| Eukaryota | Chalcone synthase |  | <i>Alliaria petiolata</i> (Garlic mustard).                                             | AAG43355.1 |  | Q9FR70 |  |
| Eukaryota | Chalcone synthase |  | <i>Ionopsidium abulense</i> (Mountain penny-cress) ( <i>Thlaspi montanum</i> ).         | AAG43360.1 |  | Q9FR65 |  |
| Eukaryota | Chalcone synthase |  | <i>Cardamine rivularis</i> .                                                            | AAG43357.1 |  | Q9FR68 |  |
| Eukaryota | Chalcone synthase |  | <i>Cochlearia danica</i> (Danish scurvygrass).                                          | AAG43350.1 |  | Q9FR75 |  |
| Eukaryota | Chalcone synthase |  | <i>Arabis turrita</i> (Tower rock-cress).                                               | AAF23582.1 |  | Q9SEM7 |  |
| Eukaryota | Chalcone synthase |  | <i>Baimashania pulvinata</i> .                                                          | ABE03655.1 |  | Q06YW1 |  |
| Eukaryota | Chalcone synthase |  | <i>Arabis procurrens</i> (Running rock-cress).                                          | AAF23580.1 |  | Q9SEM9 |  |
| Eukaryota | Chalcone synthase |  | <i>Arabis blepharophylla</i> (Coast rock-cress).                                        | AAF23562.1 |  | Q9SEP1 |  |
| Eukaryota | Chalcone synthase |  | <i>Arabis hirsuta</i> (Hairy rock-cress).                                               | AAF23571.1 |  | Q9SEN4 |  |
| Eukaryota | Chalcone synthase |  | <i>Arabis soyeri</i> subsp. <i>subcoriacea</i> .                                        | AAF23572.1 |  | Q9SEN3 |  |
| Eukaryota | Chalcone synthase |  | <i>Arabis hirsuta</i> (Hairy rock-cress).                                               | AAT96383.1 |  | Q64HU8 |  |
| Eukaryota | Chalcone synthase |  | <i>Aubrieta deltoidea</i> .                                                             | AAG43406.1 |  | Q9FR58 |  |



|           |                                |          |                                                |                           |  |                         |
|-----------|--------------------------------|----------|------------------------------------------------|---------------------------|--|-------------------------|
| Eukaryota | Chalcone synthase              |          | Aubrieta deltoidea.                            | AAF23584.1                |  | Q9SEM5                  |
| Eukaryota | Chalcone synthase              |          | Thlaspi arvense (Field penny-cress).           | AAG43353.1                |  | Q9FR72                  |
| Eukaryota | Chalcone synthase              |          | Thellungiella sp. SJ-2009.                     | ACN41950.1                |  | C0KXY8                  |
| Eukaryota | Chalcone synthase              |          | Thellungiella sp. SJ-2009.                     | ACN41947.1                |  | C0KXY5                  |
| Eukaryota | Chalcone synthase              |          | Thellungiella sp. SJ-2009.                     | ACN41946.1                |  | C0KXY4                  |
| Eukaryota | Chalcone synthase              |          | Thellungiella sp. SJ-2009.                     | ACN41949.1                |  | C0KXY7                  |
| Eukaryota | Chalcone synthase              |          | Thellungiella sp. SJ-2009.                     | ACN41948.1                |  | C0KXY6                  |
| Eukaryota | Chalcone synthase              |          | Lesquerella fendleri (Fendler's bladderpod).   | ACN41940.1                |  | C0KXX8                  |
| Eukaryota | Chalcone synthase              |          | Lesquerella fendleri (Fendler's bladderpod).   | ACN41941.1                |  | C0KXX9                  |
| Eukaryota | Chalcone synthase 4 protein    |          | Brassica rapa (Turnip).                        | ADF43045.1                |  | D5LQ18 [T]              |
| Eukaryota | Chalcone synthase              |          | Parrya nudicaulis.                             | ABE03657.2                |  | Q06YV9                  |
| Eukaryota | Chalcone synthase              |          | Brassica juncea var. napiformis.               | ADB45306.1                |  | D2XQ38 [T]              |
| Eukaryota | Naringenin-chalcone synthase   | 2.3.1.74 | Raphanus sativus (Radish).                     | AAB87072.1                |  | O22652 [T],<br>O22652.1 |
| Eukaryota | Naringenin-chalcone synthase 1 | 2.3.1.74 | Sinapis alba (White mustard) (Brassica hirta). | CAA32496.1,<br>CAA34460.1 |  | P13416 [T],<br>P13416.1 |

|           |                                |          |                                                                                      |                                          |                                          |
|-----------|--------------------------------|----------|--------------------------------------------------------------------------------------|------------------------------------------|------------------------------------------|
| Eukaryota | Naringenin-chalcone synthase 3 | 2.3.1.74 | <i>Sinapis alba</i> (White mustard) ( <i>Brassica hirta</i> ).                       | CAA32495.1                               | P13417 [T],<br>P13417.1                  |
| Eukaryota | Chalcone synthase A2           |          | <i>Brassica napus</i> (Rape).                                                        | AAC31912.1                               | O81477 [T]                               |
| Eukaryota | Chalcone synthase              |          | <i>Sisymbrium irio</i> (London rocket).                                              | AAG43359.1                               | Q9FR66                                   |
| Eukaryota | Chalcone synthase              |          | <i>Raphanus sativus</i> (Radish).                                                    | ABQ95967.1                               | B1N7K5 [T]                               |
| Eukaryota | Chalcone synthase              |          | <i>Brassica rapa</i> subsp. <i>chinensis</i> (Pak-choi).                             | ABQ28695.1                               | B1N7F0 [T]                               |
| Eukaryota | Chalcone synthase A1           |          | <i>Brassica napus</i> (Rape).                                                        | AAC31911.1                               | O81476 [T]                               |
| Eukaryota | Chalcone synthase              |          | <i>Orychophragmus violaceus</i> (Chinese violet cress) ( <i>Brassica violacea</i> ). | ABQ95961.1                               | B1N7J9 [T]                               |
| Eukaryota | Chalcone synthase              |          | <i>Brassica rapa</i> var. <i>parachinensis</i> .                                     | ABQ95962.1                               | B1N7K0 [T]                               |
| Eukaryota | Chalcone synthase              |          | <i>Brassica oleracea</i> var. <i>capitata</i> (Cabbage).                             | ABQ95964.1                               | B1N7K2 [T]                               |
| Eukaryota | Chalcone synthase              |          | <i>Brassica juncea</i> (Indian mustard) ( <i>Sinapis juncea</i> ).                   | ABQ95960.1,<br>ABQ95969.1                | B1N7J8 [T],<br>B1N7K7 [T]                |
| Eukaryota | Chalcone synthase              |          | <i>Brassica rapa</i> (Turnip).                                                       | ABO21005.1,<br>ABQ95959.1,<br>ABQ95966.1 | A9P3A7 [T],<br>B1N7J7 [T],<br>B1N7K4 [T] |
| Eukaryota | Chalcone synthase              |          | <i>Brassica napus</i> (Rape).                                                        | ABG76200.1                               | D2CFP6 [T]                               |
| Eukaryota | Chalcone synthase B1           |          | <i>Brassica napus</i> (Rape).                                                        | AAC31913.1                               | O81478 [T]                               |

|           |                      |          |                                                                               |                           |  |                                    |
|-----------|----------------------|----------|-------------------------------------------------------------------------------|---------------------------|--|------------------------------------|
| Eukaryota | Chalcone synthase B2 |          | <i>Brassica napus</i> (Rape).                                                 | AAC31914.1                |  | O81479 [T]                         |
| Eukaryota | Chalcone synthase    |          | <i>Cardamine trifolia</i> .                                                   | ABF68858.1                |  | Q1G6U4                             |
| Eukaryota | Chalcone synthase    |          | <i>Cardamine flexuosa</i> (Wavy bitter-cress) ( <i>Cardamine sylvatica</i> ). | AAT96398.1                |  | Q64HK5                             |
| Eukaryota | Chalcone synthase    |          | <i>Cardamine parviflora</i> .                                                 | ABF68893.1                |  | Q1G6Q9                             |
| Eukaryota | Chalcone synthase    |          | <i>Cardamine pratensis</i> (Cuckoo flower) (Alpine bitter-cress).             | AAG43358.1                |  | Q9FR67                             |
| Eukaryota | Chalcone synthase    |          | <i>Leiospora exscapa</i> .                                                    | ABE03667.1                |  | Q06YU9                             |
| Eukaryota | Chalcone synthase    |          | <i>Leiospora pamirica</i> .                                                   | ABE03659.1                |  | Q06YV7                             |
| Eukaryota | Chalcone synthase    |          | <i>Matthiola incana</i> (Common stock).                                       | CAD20740.1                |  | Q8H0Q0                             |
| Eukaryota | Chalcone synthase    | 2.3.1.74 | <i>Matthiola incana</i> (Common stock).                                       | CAA35600.1,<br>CAD20739.1 |  | P17818 [T],<br>P17818.1,<br>Q546H7 |
| Eukaryota | Chalcone synthase    |          | <i>Solms-laubachia jafrii</i> .                                               | ABE03665.1                |  | Q06YV1                             |
| Eukaryota | Chalcone synthase    |          | <i>Solms-laubachia</i> sp. JY-2006-1.                                         | ABE03662.1                |  | Q06YV4                             |
| Eukaryota | Chalcone synthase    |          | <i>Solms-laubachia linearifolia</i> .                                         | ABE03653.1                |  | Q06YW3                             |
| Eukaryota | Chalcone synthase    |          | <i>Christolea crassifolia</i> .                                               | ABE03660.1                |  | Q06YV6                             |

|           |                              |          |                                    |                           |  |                     |  |
|-----------|------------------------------|----------|------------------------------------|---------------------------|--|---------------------|--|
| Eukaryota | Chalcone synthase            |          | Solms-laubachia xerophyta.         | ABE03663.1                |  | Q06YV3              |  |
| Eukaryota | Chalcone synthase            |          | Solms-laubachia minor.             | ABE03661.1                |  | Q06YV5              |  |
| Eukaryota | Chalcone synthase            |          | Solms-laubachia retropilosa.       | ABE03652.1                |  | Q06YW4              |  |
| Eukaryota | Chalcone synthase            |          | Solms-laubachia sp. JY-2006-2.     | ABE03664.1                |  | Q06YV2              |  |
| Eukaryota | Chalcone synthase            |          | Solms-laubachia pulcherrima.       | ABE03651.1                |  | Q06YW5              |  |
| Eukaryota | Chalcone synthase            |          | Solms-laubachia stewartii.         | ABE03669.1                |  | Q06YU7              |  |
| Eukaryota | Chalcone synthase            |          | Solms-laubachia platycarpa.        | ABE03649.1                |  | Q06YW7              |  |
| Eukaryota | Chalcone synthase            |          | Solms-laubachia zhongdianensis.    | ABE03654.1                |  | Q06YW2              |  |
| Eukaryota | Chalcone synthase            |          | Solms-laubachia eurycarpa.         | ABE03647.1,<br>ABE03668.1 |  | Q06YU8              |  |
| Eukaryota | Chalcone synthase            |          | Solms-laubachia himalayensis.      | ABE03670.1                |  | Q06YU6              |  |
| Eukaryota | Chalcone synthase            |          | Solms-laubachia lanata.            | ABE03650.1                |  | Q06YW6              |  |
| Eukaryota | Chalcone synthase            |          | Solms-laubachia xerophyta.         | ABE03648.1                |  | Q06YW8              |  |
| Eukaryota | Naringenin-chalcone synthase | 2.3.1.74 | Arabis alpina (Alpine rock-cress). | AAF23558.1                |  | Q9SEP4,<br>Q9SEP4.1 |  |
| Eukaryota | Chalcone synthase            |          | Arabis alpina (Alpine rock-cress). | AAF23559.1                |  | Q9SEP3              |  |

|           |                   |  |                                                            |            |  |        |  |
|-----------|-------------------|--|------------------------------------------------------------|------------|--|--------|--|
| Eukaryota | Chalcone synthase |  | Lepidium campestre (Field pepperwort) (Thlaspi campestre). | AAG43352.1 |  | Q9FR73 |  |
| Eukaryota | Chalcone synthase |  | Lepidium apetalum (Pepperweed) (Lepidium micranthum).      | ACN41943.1 |  | C0KXY1 |  |
| Eukaryota | Chalcone synthase |  | Lepidium apetalum (Pepperweed) (Lepidium micranthum).      | ACN41945.1 |  | C0KXY3 |  |
| Eukaryota | Chalcone synthase |  | Lepidium apetalum (Pepperweed) (Lepidium micranthum).      | ACN41944.1 |  | C0KXY2 |  |
| Eukaryota | Chalcone synthase |  | Lepidium apetalum (Pepperweed) (Lepidium micranthum).      | ACN41942.1 |  | C0KXY0 |  |
| Eukaryota | Chalcone synthase |  | Stenopetalum velutinum.                                    | ADE18853.1 |  | D5IC06 |  |
| Eukaryota | Chalcone synthase |  | Arabidella eremigena.                                      | ADE18833.1 |  | D5IBY6 |  |
| Eukaryota | Chalcone synthase |  | Stenopetalum velutinum.                                    | ADE18852.1 |  | D5IC05 |  |
| Eukaryota | Chalcone synthase |  | Stenopetalum nutans.                                       | ADE18846.1 |  | D5IBZ9 |  |
| Eukaryota | Chalcone synthase |  | Ballantinia antipoda.                                      | ADE18838.1 |  | D5IBZ1 |  |
| Eukaryota | Chalcone synthase |  | Ballantinia antipoda.                                      | ADE18840.1 |  | D5IBZ3 |  |
| Eukaryota | Chalcone synthase |  | Erysimum handel-mazzettii.                                 | ABE03666.1 |  | Q06YV0 |  |
| Eukaryota | Chalcone synthase |  | Stenopetalum velutinum.                                    | ADE18850.1 |  | D5IC03 |  |
| Eukaryota | Chalcone synthase |  | Stenopetalum nutans.                                       | ADE18847.1 |  | D5IC00 |  |

|           |                   |  |                                                                      |                                                                        |  |        |  |
|-----------|-------------------|--|----------------------------------------------------------------------|------------------------------------------------------------------------|--|--------|--|
| Eukaryota | Chalcone synthase |  | <i>Stenopetalum velutinum</i> .                                      | ADE18849.1                                                             |  | D5IC02 |  |
| Eukaryota | Chalcone synthase |  | <i>Stenopetalum nutans</i> .                                         | ADE18842.1,<br>ADE18843.1,<br>ADE18844.1,<br>ADE18845.1,<br>ADE18848.1 |  | D5IBZ5 |  |
| Eukaryota | Chalcone synthase |  | <i>Arabidella eremigena</i> .                                        | ADE18834.1                                                             |  | D5IBY7 |  |
| Eukaryota | Chalcone synthase |  | <i>Boechea drummondii</i> (Rock-cress) ( <i>Arabis drummondii</i> ). | AAT96385.1                                                             |  | Q64HU6 |  |
| Eukaryota | Chalcone synthase |  | <i>Arabidella eremigena</i> .                                        | ADE18835.1                                                             |  | D5IBY8 |  |
| Eukaryota | Chalcone synthase |  | <i>Arabidella eremigena</i> .                                        | ADE18832.1                                                             |  | D5IBY5 |  |
| Eukaryota | Chalcone synthase |  | <i>Pachycladon latisiliquum</i> .                                    | ACN41930.1                                                             |  | C0KXW8 |  |
| Eukaryota | Chalcone synthase |  | <i>Pachycladon ensyii</i> .                                          | ACN41938.1                                                             |  | C0KXX6 |  |
| Eukaryota | Chalcone synthase |  | <i>Pachycladon novaezelandiae</i> .                                  | ACN41932.1                                                             |  | C0KXX0 |  |
| Eukaryota | Chalcone synthase |  | <i>Pachycladon exile</i> .                                           | ACN41926.1                                                             |  | C0KXW4 |  |
| Eukaryota | Chalcone synthase |  | <i>Pachycladon cheesemani</i> .                                      | ACN41928.1                                                             |  | C0KXW6 |  |
| Eukaryota | Chalcone synthase |  | <i>Pachycladon wallii</i> .                                          | ACN41936.1                                                             |  | C0KXX4 |  |
| Eukaryota | Chalcone synthase |  | <i>Pachycladon fastigiatum</i> .                                     | ACN41924.1                                                             |  | C0KXW2 |  |

|           |                   |  |                                                                                 |            |  |        |  |
|-----------|-------------------|--|---------------------------------------------------------------------------------|------------|--|--------|--|
| Eukaryota | Chalcone synthase |  | <i>Capsella rubella</i> .                                                       | AAF23581.1 |  | Q9SEM8 |  |
| Eukaryota | Chalcone synthase |  | <i>Crucihimalaya himalaica</i> (Rock-cress) ( <i>Arabidopsis brevicaulis</i> ). | AAT96387.1 |  | Q64HU4 |  |
| Eukaryota | Chalcone synthase |  | <i>Crucihimalaya himalaica</i> (Rock-cress) ( <i>Arabidopsis brevicaulis</i> ). | AAG43349.1 |  | Q9FR76 |  |
| Eukaryota | Chalcone synthase |  | <i>Crucihimalaya mollissima</i> .                                               | ACN41917.1 |  | C0KXV5 |  |
| Eukaryota | Chalcone synthase |  | <i>Ballantinia antipoda</i> .                                                   | ADE18839.1 |  | D5IBZ2 |  |
| Eukaryota | Chalcone synthase |  | <i>Ballantinia antipoda</i> .                                                   | ADE18837.1 |  | D5IBZ0 |  |
| Eukaryota | Chalcone synthase |  | <i>Ballantinia antipoda</i> .                                                   | ADE18841.1 |  | D5IBZ4 |  |
| Eukaryota | Chalcone synthase |  | <i>Capsella bursa-pastoris</i> (Shepherd's purse).                              | AAT96386.1 |  | Q64HU5 |  |
| Eukaryota | Chalcone synthase |  | <i>Halimolobos perplexus</i> var. <i>perplexus</i> .                            | AAF23569.1 |  | Q9SBS8 |  |
| Eukaryota | Chalcone synthase |  | <i>Boechera drummondii</i> (Rock-cress) ( <i>Arabis drummondii</i> ).           | AAF23564.1 |  | Q9SEN9 |  |
| Eukaryota | Chalcone synthase |  | <i>Olimarabidopsis pumila</i> (Dwarf rocket) ( <i>Arabidopsis pumila</i> ).     | AAF23567.1 |  | Q9SEN7 |  |
| Eukaryota | Chalcone synthase |  | <i>Crucihimalaya mollissima</i> .                                               | ACN41919.1 |  | C0KXV7 |  |
| Eukaryota | Chalcone synthase |  | <i>Crucihimalaya bursifolia</i> .                                               | ACN41923.1 |  | C0KXW1 |  |
| Eukaryota | Chalcone synthase |  | <i>Crucihimalaya mollissima</i> .                                               | ACN41918.1 |  | C0KXV6 |  |

|           |                                  |  |                                                                     |                                                         |  |            |  |
|-----------|----------------------------------|--|---------------------------------------------------------------------|---------------------------------------------------------|--|------------|--|
| Eukaryota | Chalcone synthase                |  | Crucihimalaya bursifolia.                                           | ACN41920.1,<br>ACN41921.1,<br>ACN41922.1                |  | C0KXV8     |  |
| Eukaryota | Chalcone synthase                |  | Olimarabidopsis pumila (Dwarf rocket)<br>(Arabidopsis pumila).      | AAT96384.1                                              |  | Q64HU7     |  |
| Eukaryota | Chalcone synthase                |  | Olimarabidopsis pumila (Dwarf rocket)<br>(Arabidopsis pumila).      | AAF23568.1                                              |  | Q9SEN6     |  |
| Eukaryota | Chalcone synthase                |  | Arabidopsis korshinskyi (Rock-cress)<br>(Olimarabidopsis cabulica). | AAG43351.1                                              |  | Q9FR74     |  |
| Eukaryota | Chalcone synthase                |  | Boechera drummondii (Rock-cress) (Arabis<br>drummondii).            | AAF23563.1                                              |  | Q9SEP0     |  |
| Eukaryota | Chalcone synthase                |  | Arabis lignifera (Desert rock-cress) (Boechera<br>lignifera).       | AAF23573.1                                              |  | Q9SEN2     |  |
| Eukaryota | Chalcone synthase                |  | Boechera fendleri.                                                  | AAF23565.1                                              |  | Q7G045     |  |
| Eukaryota | Chalcone synthase                |  | Arabis holboellii (Holboell's rockcross) (Boechera<br>holboellii).  | ACN41916.1                                              |  | C0KXV4     |  |
| Eukaryota | Chalcone synthase                |  | Arabis holboellii (Holboell's rockcross) (Boechera<br>holboellii).  | ACN41912.1,<br>ACN41913.1,<br>ACN41914.1,<br>ACN41915.1 |  | C0KXV0     |  |
| Eukaryota | Chalcone synthase                |  | Stenopetalum velutinum.                                             | ADE18851.1                                              |  | D5IC04     |  |
| Eukaryota | Chalcone synthase                |  | Arabis glabra (Tower rockcross).                                    | AAF23566.1                                              |  | Q9SEN8     |  |
| Eukaryota | Chalcone synthase family protein |  | Arabis gemmifera.                                                   | AAZ23758.1                                              |  | Q460Q1 [T] |  |



|           |                                  |          |                                         |                                                                                                                                                                                                                                                                                                                                                                                                                                                 |             |                                        |
|-----------|----------------------------------|----------|-----------------------------------------|-------------------------------------------------------------------------------------------------------------------------------------------------------------------------------------------------------------------------------------------------------------------------------------------------------------------------------------------------------------------------------------------------------------------------------------------------|-------------|----------------------------------------|
| Eukaryota | Protein TRANSPARENT TESTA 4      | 2.3.1.74 | Arabidopsis thaliana (Mouse-ear cress). | AAB35812.1,<br>AAF23561.1,<br>AAK73272.1,<br>AAL06937.1,<br>AAL25571.1,<br>AAL91279.1,<br>AAM65314.1,<br>AAN18165.1,<br>AAZ23726.1,<br>AAZ23728.1,<br>AAZ23729.1,<br>AAZ23730.1,<br>AAZ23732.1,<br>AAZ23733.1,<br>AAZ23734.1,<br>AAZ23735.1,<br>AAZ23736.1,<br>AAZ23738.1,<br>AAZ23739.1,<br>AAZ23740.1,<br>AAZ23742.1,<br>AAZ23743.1,<br>AAZ23744.1,<br>AAZ23745.1,<br>AAZ23748.1,<br>AAZ23749.1,<br>AAZ23750.1,<br>AAZ23751.1,<br>AAZ23752.1, | NP_196897.1 | P13114 [P],<br>P13114.1,<br>Q460R0 [T] |
| Eukaryota | Chalcone synthase family protein |          | Arabidopsis thaliana (Mouse-ear cress). | AAZ23756.1                                                                                                                                                                                                                                                                                                                                                                                                                                      |             | Q460Q3 [T]                             |

|           |                                     |          |                                                |                                                                                                                                                                                                                                                                                                                                                                     |  |            |  |
|-----------|-------------------------------------|----------|------------------------------------------------|---------------------------------------------------------------------------------------------------------------------------------------------------------------------------------------------------------------------------------------------------------------------------------------------------------------------------------------------------------------------|--|------------|--|
|           |                                     |          |                                                | CAF04429.1,<br>CAF04430.1,<br>CAF04431.1,<br>CAF04433.1,<br>CAF04434.1,<br>CAI30400.1,<br>CAI30401.1,<br>CAI30402.1,<br>CAI30403.1,<br>CAI30404.1,<br>CAI30405.1,<br>CAI30406.1,<br>CAI30407.1,<br>CAI30408.1,<br>CAI30409.1,<br>CAI30410.1,<br>CAI30411.1,<br>CAI30412.1,<br>CAI30413.1,<br>CAI30414.1,<br>CAI30415.1,<br>CAI30416.1,<br>CAI30417.1,<br>CAI30418.1 |  |            |  |
| Eukaryota | Chalcone synthase                   | 2.3.1.74 | <i>Arabidopsis thaliana</i> (Mouse-ear cress). |                                                                                                                                                                                                                                                                                                                                                                     |  | Q705N9     |  |
| Eukaryota | Chalcone synthase                   |          | <i>Arabidopsis thaliana</i> (Mouse-ear cress). | CAF04432.1                                                                                                                                                                                                                                                                                                                                                          |  | Q705N7     |  |
| Eukaryota | Mutant protein of chalcone synthase |          | <i>Arabidopsis thaliana</i> (Mouse-ear cress). | BAD89854.1                                                                                                                                                                                                                                                                                                                                                          |  | Q5FBU9     |  |
| Eukaryota | Chalcone synthase family protein    |          | <i>Arabidopsis thaliana</i> (Mouse-ear cress). | AAZ23741.1                                                                                                                                                                                                                                                                                                                                                          |  | Q460R8 [T] |  |
| Eukaryota | Chalcone synthase family protein    |          | <i>Arabidopsis thaliana</i> (Mouse-ear cress). | AAZ23747.1                                                                                                                                                                                                                                                                                                                                                          |  | Q460R2 [T] |  |
| Eukaryota | Chalcone synthase family protein    |          | <i>Arabidopsis thaliana</i> (Mouse-ear cress). | AAZ23727.1                                                                                                                                                                                                                                                                                                                                                          |  | Q460T2 [T] |  |
| Eukaryota | Chalcone synthase family protein    |          | <i>Arabidopsis thaliana</i> (Mouse-ear cress). | AAZ23746.1                                                                                                                                                                                                                                                                                                                                                          |  | Q460R3 [T] |  |

|           |                                     |          |                                                                                  |                                                                                                                                                   |  |                   |  |
|-----------|-------------------------------------|----------|----------------------------------------------------------------------------------|---------------------------------------------------------------------------------------------------------------------------------------------------|--|-------------------|--|
| Eukaryota | Mutant protein of chalcone synthase |          | Arabidopsis thaliana (Mouse-ear cress).                                          | BAD89858.1                                                                                                                                        |  | Q5FBU5            |  |
| Eukaryota | Chalcone synthase family protein    |          | Arabidopsis thaliana (Mouse-ear cress).                                          | AAZ23737.1                                                                                                                                        |  | Q460S2 [T]        |  |
| Eukaryota | Chalcone synthase family protein    |          | Arabidopsis thaliana (Mouse-ear cress).                                          | AAZ23731.1                                                                                                                                        |  | Q460S8 [T]        |  |
| Eukaryota | Chalcone synthase family protein    |          | Arabidopsis thaliana (Mouse-ear cress).                                          | AAZ23755.1                                                                                                                                        |  | Q460Q4 [T]        |  |
| Eukaryota | Mutant protein of chalcone synthase |          | Arabidopsis thaliana (Mouse-ear cress).                                          | BAD89857.1                                                                                                                                        |  | Q5FBU6            |  |
| Eukaryota | Chalcone synthase                   | 2.3.1.74 | Arabidopsis thaliana (Mouse-ear cress).                                          | CAI30399.1                                                                                                                                        |  | Q5QPX9            |  |
| Eukaryota | Chalcone synthase                   |          | Arabidopsis thaliana (Mouse-ear cress).                                          | AAT96388.1                                                                                                                                        |  | Q64HU3            |  |
| Eukaryota | Chalcone synthase family protein    |          | Arabis gemmifera.                                                                | AAZ23767.1                                                                                                                                        |  | Q460P2 [T]        |  |
| Eukaryota | Chalcone synthase                   |          | Arabidopsis lyrata subsp. petraea (Northern rock-cress) (Cardaminopsis petraea). | AAF23579.1                                                                                                                                        |  | Q9SBU7            |  |
| Eukaryota | Chalcone synthase                   |          | Arabidopsis lyrata subsp. petraea (Northern rock-cress) (Cardaminopsis petraea). | CAF04415.1                                                                                                                                        |  | Q705Q4            |  |
| Eukaryota | Chalcone synthase                   |          | Arabidopsis lyrata subsp. lyrata.                                                | CAF04408.1,<br>CAF04410.1,<br>CAF04411.1,<br>CAF04412.1,<br>CAF04413.1,<br>CAF04414.1,<br>CAF04416.1,<br>CAF04417.1,<br>CAF04460.1,<br>CAF04461.1 |  | Q705Q6,<br>Q705Q9 |  |

|           |                                  |  |                                                                                                         |                                                         |                |                   |  |
|-----------|----------------------------------|--|---------------------------------------------------------------------------------------------------------|---------------------------------------------------------|----------------|-------------------|--|
| Eukaryota | Chalcone synthase                |  | <i>Arabidopsis lyrata</i> subsp. <i>lyrata</i> .                                                        | ABA62610.1                                              |                | Q0H703            |  |
| Eukaryota | Chalcone synthase                |  | <i>Arabidopsis lyrata</i> subsp. <i>lyrata</i> .                                                        | AAF23575.1,<br>EFH47850.1                               | XP_002871591.1 | Q9SEN1            |  |
| Eukaryota | Chalcone synthase                |  | <i>Arabidopsis lyrata</i> (Lyre-leaved rock-cress).                                                     | AAT96381.1                                              |                | Q64HV0            |  |
| Eukaryota | Chalcone synthase                |  | <i>Arabidopsis lyrata</i> subsp. <i>petraea</i> (Northern rock-cress) ( <i>Cardaminopsis petraea</i> ). | ACX51028.1,<br>ACX51029.1,<br>ACX51030.1,<br>ACX51031.1 |                | D0E301,<br>D0E303 |  |
| Eukaryota | Chalcone synthase                |  | <i>Arabidopsis croatica</i> .                                                                           | CAI30817.1                                              |                | Q5NDK6            |  |
| Eukaryota | Chalcone synthase                |  | <i>Arabidopsis lyrata</i> subsp. <i>petraea</i> (Northern rock-cress) ( <i>Cardaminopsis petraea</i> ). | AAF23578.1                                              |                | Q9SBU8            |  |
| Eukaryota | Chalcone synthase                |  | <i>Cardaminopsis arenosa</i> (Sand rock-cress) ( <i>Arabidopsis arenosa</i> ).                          | AAT96382.1                                              |                | Q64HU9            |  |
| Eukaryota | Chalcone synthase family protein |  | <i>Arabis gemmifera</i> .                                                                               | AAZ23761.1                                              |                | Q460P8 [T]        |  |
| Eukaryota | Chalcone synthase family protein |  | <i>Arabis gemmifera</i> .                                                                               | AAZ23763.1                                              |                | Q460P6 [T]        |  |
| Eukaryota | Chalcone synthase                |  | <i>Arabidopsis kamchatica</i> subsp. <i>kawasakiana</i> .                                               | ACX51012.1                                              |                | D0E2Y5            |  |
| Eukaryota | Chalcone synthase family protein |  | <i>Arabis gemmifera</i> .                                                                               | AAZ23762.1                                              |                | Q460P7 [T]        |  |
| Eukaryota | Chalcone synthase                |  | <i>Arabidopsis kamchatica</i> subsp. <i>kamchatica</i> .                                                | ACX51013.1                                              |                | D0E2Y6            |  |
| Eukaryota | Chalcone synthase                |  | <i>Arabidopsis kamchatica</i> subsp. <i>kamchatica</i> .                                                | ACX51016.1                                              |                | D0E2Y9            |  |

|           |                                  |  |                          |                                                                                                                                                                  |  |            |  |
|-----------|----------------------------------|--|--------------------------|------------------------------------------------------------------------------------------------------------------------------------------------------------------|--|------------|--|
| Eukaryota | Chalcone synthase                |  | Arabidopsis kamchatica.  | ABA62606.1                                                                                                                                                       |  | Q0H707     |  |
| Eukaryota | Chalcone synthase                |  | Arabidopsis halleri.     | CAF04418.1,<br>CAF04419.1,<br>CAF04420.1,<br>CAF04421.1,<br>CAF04422.1,<br>CAF04423.1,<br>CAF04424.1,<br>CAF04425.1,<br>CAF04426.1,<br>CAF04427.1,<br>CAF04428.1 |  | Q705Q0     |  |
| Eukaryota | Chalcone synthase                |  | Arabidopsis halleri.     | AAF23570.1                                                                                                                                                       |  | Q9SEN5     |  |
| Eukaryota | Chalcone synthase                |  | Arabidopsis pedemontana. | ACV97166.1                                                                                                                                                       |  | C9DD59     |  |
| Eukaryota | Chalcone synthase family protein |  | Arabis gemmifera.        | AAZ23760.1                                                                                                                                                       |  | Q460P9 [T] |  |
| Eukaryota | Chalcone synthase family protein |  | Arabis gemmifera.        | AAZ23766.1                                                                                                                                                       |  | Q460P3 [T] |  |
| Eukaryota | Chalcone synthase family protein |  | Arabis gemmifera.        | AAZ23759.1                                                                                                                                                       |  | Q460Q0 [T] |  |
| Eukaryota | Chalcone synthase family protein |  | Arabis gemmifera.        | AAZ23771.1                                                                                                                                                       |  | Q460N8 [T] |  |
| Eukaryota | Chalcone synthase family protein |  | Arabis gemmifera.        | AAZ23765.1                                                                                                                                                       |  | Q460P4 [T] |  |
| Eukaryota | Chalcone synthase                |  | Arabis gemmifera.        | CAI30816.1                                                                                                                                                       |  | Q5NDK7     |  |
| Eukaryota | Chalcone synthase family protein |  | Arabis gemmifera.        | AAZ23769.1                                                                                                                                                       |  | Q460P0 [T] |  |

|           |                                  |  |                                                           |                                                                                                                                                                                                               |  |                   |  |
|-----------|----------------------------------|--|-----------------------------------------------------------|---------------------------------------------------------------------------------------------------------------------------------------------------------------------------------------------------------------|--|-------------------|--|
| Eukaryota | Chalcone synthase family protein |  | <i>Arabis gemmifera</i> .                                 | AAZ23764.1,<br>AAZ23768.1,<br>AAZ23770.1,<br>AAZ23772.1                                                                                                                                                       |  | Q460P1 [T]        |  |
| Eukaryota | Chalcone synthase                |  | <i>Arabidopsis kamchatica</i> subsp. <i>kawasakiana</i> . | ACX51011.1,<br>ACX51014.1,<br>ACX51015.1,<br>ACX51017.1,<br>ACX51018.1,<br>ACX51019.1,<br>ACX51020.1,<br>ACX51021.1,<br>ACX51022.1,<br>ACX51023.1,<br>ACX51024.1,<br>ACX51025.1,<br>ACX51026.1,<br>ACX51027.1 |  | DOE2Y4,<br>DOE2Z2 |  |
| Eukaryota | Chalcone synthase                |  | <i>Arabis gemmifera</i> .                                 | ABA62605.1                                                                                                                                                                                                    |  | Q0H708            |  |
| Eukaryota | Chalcone synthase                |  | <i>Cardamine asarifolia</i> .                             | ABF68903.1                                                                                                                                                                                                    |  | Q1G6P9            |  |
| Eukaryota | Chalcone synthase                |  | <i>Cardamine asarifolia</i> .                             | ABF68907.1,<br>ABF68908.1                                                                                                                                                                                     |  | Q1G6P4            |  |
| Eukaryota | Chalcone synthase                |  | <i>Cardamine hirsuta</i> (Hairy bitter-cress).            | ABF68894.1,<br>ABF68895.1                                                                                                                                                                                     |  | Q1G6Q7            |  |
| Eukaryota | Chalcone synthase                |  | <i>Cardamine hirsuta</i> (Hairy bitter-cress).            | ABF68896.1                                                                                                                                                                                                    |  | Q1G6Q6            |  |
| Eukaryota | Chalcone synthase                |  | <i>Cardamine x ferrarii</i> .                             | ABF68924.1,<br>ABF68926.1                                                                                                                                                                                     |  | Q1G6M6            |  |
| Eukaryota | Chalcone synthase                |  | <i>Cardamine x ferrarii</i> .                             | ABF68928.1                                                                                                                                                                                                    |  | Q1G6M4            |  |
| Eukaryota | Chalcone synthase                |  | <i>Cardamine x ferrarii</i> .                             | ABF68925.1                                                                                                                                                                                                    |  | Q1G6M7            |  |

|           |                              |          |                                                            |                                                                        |  |                     |  |
|-----------|------------------------------|----------|------------------------------------------------------------|------------------------------------------------------------------------|--|---------------------|--|
| Eukaryota | Chalcone synthase            |          | Cardamine asarifolia.                                      | ABF68897.1,<br>ABF68898.1,<br>ABF68904.1,<br>ABF68905.1,<br>ABF68906.1 |  | Q1G6P6              |  |
| Eukaryota | Chalcone synthase            |          | Cardamine x ferrarii.                                      | ABF68927.1                                                             |  | Q1G6M5              |  |
| Eukaryota | Chalcone synthase            |          | Cardamine apennina.                                        | ABF68865.1                                                             |  | Q1G6T7              |  |
| Eukaryota | Chalcone synthase            |          | Cardamine castellana.                                      | ABF68861.1                                                             |  | Q1G6U1              |  |
| Eukaryota | Chalcone synthase            |          | Cardamine matthioli.                                       | ABF68864.1                                                             |  | Q1G6T8              |  |
| Eukaryota | Chalcone synthase            |          | Cardamine asarifolia.                                      | ABF68913.1                                                             |  | Q1G6N9              |  |
| Eukaryota | Chalcone synthase            |          | Cardamine asarifolia.                                      | ABF68910.1,<br>ABF68911.1                                              |  | Q1G6P1              |  |
| Eukaryota | Chalcone synthase            |          | Cardamine asarifolia.                                      | ABF68901.1                                                             |  | Q1G6Q1              |  |
| Eukaryota | Chalcone synthase            |          | Cardamine asarifolia.                                      | ABF68899.1,<br>ABF68902.1                                              |  | Q1G6Q0              |  |
| Eukaryota | Chalcone synthase            |          | Cardamine asarifolia.                                      | ABF68900.1                                                             |  | Q1G6Q2              |  |
| Eukaryota | Chalcone synthase            |          | Cardamine pratensis (Cuckoo flower) (Alpine bitter-cress). | ABF68874.1                                                             |  | Q1G6S8              |  |
| Eukaryota | Chalcone synthase            |          | Cardamine asarifolia.                                      | ABF68909.1                                                             |  | Q1G6P3              |  |
| Eukaryota | Naringenin-chalcone synthase | 2.3.1.74 | Cardamine amara (Large bitter-cress).                      | AAF23560.1                                                             |  | Q9SEP2,<br>Q9SEP2.1 |  |

|           |                             |  |                                   |                                                                                       |                                         |  |
|-----------|-----------------------------|--|-----------------------------------|---------------------------------------------------------------------------------------|-----------------------------------------|--|
| Eukaryota | Chalcone synthase           |  | Cardamine amara subsp. balcanica. | ABF68866.1,<br>ABF68875.1,<br>ABF68876.1,<br>ABF68886.1,<br>ABF68888.1,<br>ABF68889.1 | Q1G6R3,<br>Q1G6S6,<br>Q1G6S7,<br>Q1G6T6 |  |
| Eukaryota | Chalcone synthase           |  | Cardamine acris.                  | ABF68859.1,<br>ABF68872.1                                                             | Q1G6T0                                  |  |
| Eukaryota | Chalcone synthase           |  | Cardamine asarifolia.             | ABF68916.1                                                                            | Q1G6N6                                  |  |
| Eukaryota | Chalcone synthase           |  | Cardamine amara subsp. amara.     | ABF68883.1,<br>ABF68884.1,<br>ABF68885.1,<br>ABF68887.1,<br>ABF68890.1,<br>ABF68891.1 | Q1G6R1                                  |  |
| Eukaryota | Chalcone synthase           |  | Cardamine penzesii.               | AAG43356.1                                                                            | Q9FR69                                  |  |
| Eukaryota | Chalcone synthase           |  | Cardamine uliginosa.              | ABF68860.1                                                                            | Q1G6U2                                  |  |
| Eukaryota | Chalcone synthase 1 protein |  | Brassica rapa (Turnip).           | ADF43042.1                                                                            | D5LQ15                                  |  |
| Eukaryota | Chalcone synthase           |  | Cardamine pectinata.              | ABF68880.1                                                                            | Q1G6S2                                  |  |
| Eukaryota | Chalcone synthase           |  | Cardamine impatiens.              | ABF68871.1                                                                            | Q1G6T1                                  |  |
| Eukaryota | Chalcone synthase           |  | Cardamine graeca.                 | ABF68879.1                                                                            | Q1G6S3                                  |  |
| Eukaryota | Chalcone synthase           |  | Cardamine graeca.                 | ACJ68467.1,<br>ACJ68468.1,<br>ACJ68469.1                                              | B7TRA7                                  |  |
| Eukaryota | Chalcone synthase           |  | Cardamine carnosa.                | ACJ68475.1,<br>ACJ68476.1                                                             | B7TRB5                                  |  |



|           |                   |  |                                    |                                                         |  |        |  |
|-----------|-------------------|--|------------------------------------|---------------------------------------------------------|--|--------|--|
| Eukaryota | Chalcone synthase |  | Pachycladon latisiliquum.          | ACN41931.1                                              |  | C0KXW9 |  |
| Eukaryota | Chalcone synthase |  | Pachycladon fastigiatum.           | ACN41925.1                                              |  | C0KXW3 |  |
| Eukaryota | Chalcone synthase |  | Pachycladon novaezelandiae.        | ACN41933.1                                              |  | C0KXX1 |  |
| Eukaryota | Chalcone synthase |  | Pachycladon exile.                 | ACN41927.1                                              |  | C0KXW5 |  |
| Eukaryota | Chalcone synthase |  | Pachycladon wallii.                | ACN41937.1                                              |  | C0KXX5 |  |
| Eukaryota | Chalcone synthase |  | Pachycladon cheesemanii.           | ACN41929.1                                              |  | C0KXW7 |  |
| Eukaryota | Chalcone synthase |  | Barbarea vulgaris (Yellow rocket). | AAF23583.1                                              |  | Q9SEM6 |  |
| Eukaryota | Chalcone synthase |  | Barbarea vulgaris (Yellow rocket). | ABF68892.1                                              |  | Q1G6R0 |  |
| Eukaryota | Chalcone synthase |  | Cardamine sp. JK-2008m.            | ACJ68507.1                                              |  | B7TRE7 |  |
| Eukaryota | Chalcone synthase |  | Cardamine maritima.                | ACJ68493.1                                              |  | B7TRD3 |  |
| Eukaryota | Chalcone synthase |  | Cardamine sp. JK-2008a.            | ACJ68499.1                                              |  | B7TRD9 |  |
| Eukaryota | Chalcone synthase |  | Cardamine serbica.                 | ACJ68485.1                                              |  | B7TRC5 |  |
| Eukaryota | Chalcone synthase |  | Cardamine fialae.                  | ACJ68463.1,<br>ACJ68464.1,<br>ACJ68465.1,<br>ACJ68466.1 |  | B7TRA3 |  |

|           |                   |  |                                                                  |                                                                                                                                    |  |                              |  |
|-----------|-------------------|--|------------------------------------------------------------------|------------------------------------------------------------------------------------------------------------------------------------|--|------------------------------|--|
| Eukaryota | Chalcone synthase |  | Cardamine fialae.                                                | ABF68878.1                                                                                                                         |  | Q1G6S4                       |  |
| Eukaryota | Chalcone synthase |  | Cardamine maritima.                                              | ABF68856.1                                                                                                                         |  | Q1G6U6                       |  |
| Eukaryota | Chalcone synthase |  | Cardamine monteluccii.                                           | ACJ68482.1,<br>ACJ68483.1,<br>ACJ68484.1                                                                                           |  | B7TRC2                       |  |
| Eukaryota | Chalcone synthase |  | Rorippa amphibia (Great yellow-cress)<br>(Nasturtium amphibium). | AAG43348.1                                                                                                                         |  | Q9FR77                       |  |
| Eukaryota | Chalcone synthase |  | Cardamine rupestris.                                             | ABF68867.1                                                                                                                         |  | Q1G6T5                       |  |
| Eukaryota | Chalcone synthase |  | Cardamine sp. JK-2008m.                                          | ACJ68461.1,<br>ACJ68462.1,<br>ACJ68490.1,<br>ACJ68498.1,<br>ACJ68502.1,<br>ACJ68503.1,<br>ACJ68504.1,<br>ACJ68505.1,<br>ACJ68506.1 |  | B7TRA1,<br>B7TRD8,<br>B7TRE2 |  |
| Eukaryota | Chalcone synthase |  | Cardamine resedifolia.                                           | ACJ68470.1                                                                                                                         |  | B7TRB0                       |  |
| Eukaryota | Chalcone synthase |  | Cardamine glauca.                                                | ABF68868.1                                                                                                                         |  | Q1G6T4                       |  |
| Eukaryota | Chalcone synthase |  | Cardamine alpina.                                                | ABF68855.1                                                                                                                         |  | Q1G6U7                       |  |
| Eukaryota | Chalcone synthase |  | Cardamine resedifolia.                                           | ACJ68471.1,<br>ACJ68472.1,<br>ACJ68474.1                                                                                           |  | B7TRB1                       |  |
| Eukaryota | Chalcone synthase |  | Cardamine plumieri.                                              | ACJ68449.1,<br>ACJ68450.1,<br>ACJ68453.1,<br>ACJ68454.1,<br>ACJ68458.1,<br>ACJ68459.1                                              |  | B7TR89                       |  |

|           |                                |          |                                      |                                                                                       |                |                            |  |
|-----------|--------------------------------|----------|--------------------------------------|---------------------------------------------------------------------------------------|----------------|----------------------------|--|
| Eukaryota | Chalcone synthase              |          | Cardamine plumieri.                  | ACJ68451.1,<br>ACJ68452.1,<br>ACJ68455.1,<br>ACJ68456.1,<br>ACJ68457.1,<br>ACJ68460.1 |                | B7TR91                     |  |
| Eukaryota | Chalcone synthase              |          | Triticum aestivum (Wheat).           | AAQ19320.1                                                                            |                | Q6WGQ1                     |  |
| Eukaryota | Naringenin-chalcone synthase 1 | 2.3.1.74 | Secale cereale (Rye).                | CAA63306.1                                                                            |                | P53414,<br>P53414.1        |  |
| Eukaryota | Chalcone synthase              |          | Triticum aestivum (Wheat).           | AAQ19323.1                                                                            |                | Q6WGP8<br>[T]              |  |
| Eukaryota | Chalcone synthase              |          | Thinopyrum ponticum.                 | AAQ19319.1                                                                            |                | Q6WGQ2                     |  |
| Eukaryota | Chalcone synthase              |          | Triticum aestivum (Wheat).           | AAQ19321.1,<br>AAQ19322.1                                                             |                | Q6WGP9<br>[T]              |  |
| Eukaryota | Naringenin-chalcone synthase 2 | 2.3.1.74 | Secale cereale (Rye).                | CAA63305.1                                                                            |                | P53415 [T],<br>P53415.1    |  |
| Eukaryota | Chalcone synthase              |          | Triticum aestivum (Wheat).           | AAQ19318.1                                                                            |                | Q6WGQ3                     |  |
| Eukaryota | Naringenin-chalcone synthase 1 | 2.3.1.74 | Hordeum vulgare (Barley).            | CAA41250.1                                                                            |                | P26018,<br>P26018.1        |  |
| Eukaryota | Chalcone synthase              |          | Hordeum vulgare (Barley).            | ACH42078.1                                                                            |                | B5LXZ9 [T]                 |  |
| Eukaryota | Naregenin-chalcone synthase    | 2.3.1.74 | Oryza sativa subsp. japonica (Rice). | ABA94123.1,<br>BAA19186.2,<br>BAB39764.1,<br>BAF28372.1,<br>EAZ18579.1                | NP_001068009.1 | Q2R3A1<br>[T],<br>Q2R3A1.1 |  |
| Eukaryota | Naregenin-chalcone synthase    | 2.3.1.74 | Oryza sativa subsp. indica (Rice).   | CAA61955.1,<br>EAY81161.1                                                             |                | A2ZEX7 [T],<br>A2ZEX7.1    |  |

|           |                                              |          |                                              |                                          |                                                      |                                |  |
|-----------|----------------------------------------------|----------|----------------------------------------------|------------------------------------------|------------------------------------------------------|--------------------------------|--|
| Eukaryota | Putative uncharacterized protein Sb05g020220 | 2.3.1.74 | Sorghum bicolor (Sorghum) (Sorghum vulgare). | AAD41879.1,<br>EES09864.1                | XP_002450876.1                                       | C5Y3Q2,<br>Q9XGX1,<br>Q9XGX1.1 |  |
| Eukaryota | Putative uncharacterized protein Sb05g020200 | 2.3.1.74 | Sorghum bicolor (Sorghum) (Sorghum vulgare). | AAD41873.1,<br>EES09862.1                | XP_002450874.1                                       | C5Y3Q0,<br>Q9XGX2,<br>Q9XGX2.1 |  |
| Eukaryota | Putative uncharacterized protein Sb05g020210 | 2.3.1.74 | Sorghum bicolor (Sorghum) (Sorghum vulgare). | AAD41875.1,<br>EES09863.1                | XP_002450875.1                                       | C5Y3Q1,<br>Q9SBL6,<br>Q9SBL6.1 |  |
| Eukaryota | Putative uncharacterized protein Sb05g020160 | 2.3.1.74 | Sorghum bicolor (Sorghum) (Sorghum vulgare). | AAD41876.1,<br>EES09858.1                | XP_002450870.1                                       | C5Y3P6,<br>Q9SBL5,<br>Q9SBL5.1 |  |
| Eukaryota | Naringenin-chalcone synthase 5               | 2.3.1.74 | Sorghum bicolor (Sorghum) (Sorghum vulgare). | AAD41877.1                               |                                                      | Q9SBL4,<br>Q9SBL4.1            |  |
| Eukaryota | Putative uncharacterized protein Sb05g020230 | 2.3.1.74 | Sorghum bicolor (Sorghum) (Sorghum vulgare). | AAD41878.1,<br>EES09865.1                | XP_002450877.1                                       | C5Y3Q3,<br>Q9SBL3,<br>Q9SBL3.1 |  |
| Eukaryota | Putative uncharacterized protein Sb05g020150 |          | Sorghum bicolor (Sorghum) (Sorghum vulgare). | EES08604.1                               | XP_002449616.1                                       | C5Y3P5                         |  |
| Eukaryota | Naringenin-chalcone synthase 2               | 2.3.1.74 | Sorghum bicolor (Sorghum) (Sorghum vulgare). | AAD41874.1                               |                                                      | Q9SBL7,<br>Q9SBL7.1            |  |
| Eukaryota | Putative uncharacterized protein Sb05g020190 |          | Sorghum bicolor (Sorghum) (Sorghum vulgare). | EES09859.1,<br>EES09860.1,<br>EES09861.1 | XP_002450871.1,<br>XP_002450872.1,<br>XP_002450873.1 | C5Y3P7                         |  |
| Eukaryota | White pollen                                 | 2.3.1.74 | Zea mays (Maize).                            | CAA42763.1                               |                                                      | P24824,<br>P24824.1            |  |
| Eukaryota | Chalcone synthase                            |          | Zea mays (Maize).                            | ACG33857.1                               | NP_001149022.1                                       | B6T9S4 [T]                     |  |
| Eukaryota | Putative uncharacterized protein             |          | Zea mays (Maize).                            | ACF87981.1                               |                                                      | B4G0T8 [T]                     |  |
| Eukaryota | Chalcone synthase C2-Idf-III                 |          | Zea mays (Maize).                            | AAW56963.1                               |                                                      | Q4QWZ5                         |  |
| Eukaryota | Putative uncharacterized protein             |          | Zea mays (Maize).                            | ACN31816.1                               |                                                      | C0PCC1 [T]                     |  |

|           |                                  |          |                                                   |                                                                        |                |                                       |
|-----------|----------------------------------|----------|---------------------------------------------------|------------------------------------------------------------------------|----------------|---------------------------------------|
| Eukaryota | Putative uncharacterized protein | 2.3.1.74 | Zea mays (Maize).                                 | AAW56961.1,<br>AAW56962.1,<br>AAW56964.1,<br>ACN26676.1,<br>CAA42764.1 | NP_001142246.1 | P24825,<br>P24825.1,<br>Q4QWZ6<br>[T] |
| Eukaryota | Chalcone synthase                |          | Lilium hybrid division VII.                       | AAD49354.1                                                             |                | Q9SBS4 [T]                            |
| Eukaryota | Type III polyketide synthase 3   |          | Musa acuminata AAA Group.                         | ADE59487.1                                                             |                | D5KZK0 [T]                            |
| Eukaryota | Chalcone synthase                | 2.3.1.74 | Lilium hybrid division I.                         | BAB40787.2                                                             |                | Q9AVC0 [T]                            |
| Eukaryota | Chalcone synthase                |          | Lilium hybrid cultivar.                           | ABF82595.1                                                             |                | Q19S38                                |
| Eukaryota | Chalcone synthase                |          | Lilium hybrid division VII.                       | AAD49355.1                                                             |                | Q9SBS3 [T]                            |
| Eukaryota | Chalcone synthase                |          | Lilium hybrid cultivar.                           | ACX31605.1                                                             |                | D0EFL8 [T]                            |
| Eukaryota | Chalcone synthase                |          | Tricyrtis hirta (Toad lily) (Tricyrtis japonica). | BAH16615.1                                                             |                | B9A9B4 [T]                            |
| Eukaryota | Chalcone synthase                | 2.3.1.74 | Lilium hybrid division I.                         | BAB40786.2                                                             |                | Q9AVC1 [T]                            |
| Eukaryota | Chalcone synthase                |          | Lilium hybrid division VII.                       | AAD49353.1                                                             |                | Q9SBS5 [T]                            |
| Eukaryota | Chalcon synthase                 |          | Lilium speciosum.                                 | BAE79201.1                                                             |                | Q2L6K4 [T]                            |
| Eukaryota | Chalcone synthase                |          | Anthurium andraeanum (Flamingo lily).             | ABE01413.1                                                             |                | Q1W9N0                                |

|           |                                |          |                                                                                            |            |  |                         |
|-----------|--------------------------------|----------|--------------------------------------------------------------------------------------------|------------|--|-------------------------|
| Eukaryota | Putative chalcone synthase     |          | <i>Anthurium andraeanum</i> (Flamingo lily).                                               | AAP20864.1 |  | Q84L24 [T]              |
| Eukaryota | Chalcone synthase              |          | <i>Scutellaria baicalensis</i> (Baical skullcap).                                          | AAB88208.1 |  | O48564 [T]              |
| Eukaryota | Chalcone synthase              |          | <i>Scutellaria baicalensis</i> (Baical skullcap).                                          | BAB03471.1 |  | Q9LRB2 [T]              |
| Eukaryota | Chalcone synthase              |          | <i>Scutellaria baicalensis</i> (Baical skullcap).                                          | BAA23373.1 |  | O22122 [T]              |
| Eukaryota | Chalcone synthase              |          | <i>Scutellaria baicalensis</i> (Baical skullcap).                                          | ABS83551.1 |  | B2BH31 [T]              |
| Eukaryota | Naringenin-chalcone synthase   | 2.3.1.74 | <i>Chrysosplenium americanum</i> (Golden saxifrage).                                       | AAB54075.1 |  | O04220 [T],<br>O04220.1 |
| Eukaryota | Chalcone synthase              |          | <i>Siraitia grosvenorii</i> (Monk's fruit) (Luo han guo).                                  | ADF57184.1 |  | D6PV09 [T]              |
| Eukaryota | Naringenin-chalcone synthase 3 | 2.3.1.74 | <i>Gerbera hybrida</i> .                                                                   | CAA86220.1 |  | P48392 [T],<br>P48392.1 |
| Eukaryota | Naringenin-chalcone synthase 1 | 2.3.1.74 | <i>Gerbera hybrida</i> .                                                                   | CAA86218.1 |  | P48390 [T],<br>P48390.1 |
| Eukaryota | Chalcone synthase              |          | <i>Ageratina adenophora</i> .                                                              | ACQ84148.2 |  | C4PB35 [T]              |
| Eukaryota | Chalcone synthase              |          | <i>Rudbeckia hirta</i> (Black-eyed Susan).                                                 | ABN79673.1 |  | A8QKF1 [T]              |
| Eukaryota | Chalcone synthase              |          | <i>Chrysanthemum morifolium</i> (Florist's daisy)<br>( <i>Dendranthema grandiflorum</i> ). | ABF69124.1 |  | Q19LA8 [T]              |
| Eukaryota | Naringenin-chalcone synthase   | 2.3.1.74 | <i>Callistephus chinensis</i> (China aster).                                               | CAA91930.1 |  | P48385 [T],<br>P48385.2 |

|           |                   |  |                                       |                                                                                                                                                                                                                                                                                          |  |        |  |
|-----------|-------------------|--|---------------------------------------|------------------------------------------------------------------------------------------------------------------------------------------------------------------------------------------------------------------------------------------------------------------------------------------|--|--------|--|
|           |                   |  |                                       | ABW89080.1,<br>ABW89081.1,<br>ABW89082.1,<br>ABW89083.1,<br>ABW89084.1,<br>ABW89085.1,<br>ABW89086.1,<br>ABW89087.1,<br>ABW89088.1,<br>ABW89089.1,<br>ABW89090.1,<br>ABW89091.1,<br>ABW89092.1,<br>ABW89093.1,<br>ABW89094.1,<br>ABW89095.1,<br>ABW89096.1,<br>ABW89097.1,<br>ABW89098.1 |  |        |  |
| Eukaryota | Chalcone synthase |  | Helianthus annuus (Common sunflower). |                                                                                                                                                                                                                                                                                          |  | B5KUB7 |  |
| Eukaryota | Chalcone synthase |  | Helianthus annuus (Common sunflower). | ABG35635.1,<br>ABG35636.1                                                                                                                                                                                                                                                                |  | Q15D75 |  |
| Eukaryota | Chalcone synthase |  | Helianthus annuus (Common sunflower). | ABG35615.1,<br>ABG35616.1                                                                                                                                                                                                                                                                |  | Q15D95 |  |
| Eukaryota | Chalcone synthase |  | Helianthus annuus (Common sunflower). | ABG35623.1,<br>ABG35624.1                                                                                                                                                                                                                                                                |  | Q15D87 |  |
| Eukaryota | Chalcone synthase |  | Helianthus annuus (Common sunflower). | ABG35639.1,<br>ABG35640.1                                                                                                                                                                                                                                                                |  | Q15D71 |  |

|           |                   |  |                                       |                                                                                                                                                                                                                                                                                                                                                                                                                                                 |  |            |  |
|-----------|-------------------|--|---------------------------------------|-------------------------------------------------------------------------------------------------------------------------------------------------------------------------------------------------------------------------------------------------------------------------------------------------------------------------------------------------------------------------------------------------------------------------------------------------|--|------------|--|
| Eukaryota | Chalcone synthase |  | Helianthus annuus (Common sunflower). | ABG35631.1,<br>ABG35632.1                                                                                                                                                                                                                                                                                                                                                                                                                       |  | Q15D79     |  |
|           |                   |  |                                       | ABG35612.1,<br>ABG35613.1,<br>ABG35614.1,<br>ABG35617.1,<br>ABG35618.1,<br>ABG35619.1,<br>ABG35620.1,<br>ABG35621.1,<br>ABG35622.1,<br>ABG35625.1,<br>ABG35626.1,<br>ABG35627.1,<br>ABG35628.1,<br>ABG35629.1,<br>ABG35630.1,<br>ABG35633.1,<br>ABG35634.1,<br>ABG35637.1,<br>ABG35638.1,<br>ABG35641.1,<br>ABG35642.1,<br>ABG35643.1,<br>ABG35644.1,<br>ABG35645.1,<br>ABG35646.1,<br>ABG35647.1,<br>ABG35648.1,<br>ABG35649.1,<br>ABG35650.1, |  |            |  |
| Eukaryota | Chalcone synthase |  | Helianthus annuus (Common sunflower). |                                                                                                                                                                                                                                                                                                                                                                                                                                                 |  | Q15D37     |  |
| Eukaryota | Chalcone synthase |  | Gerbera hybrida.                      | CAP20328.1                                                                                                                                                                                                                                                                                                                                                                                                                                      |  | B7ZF46 [T] |  |
| Eukaryota | Chalcone synthase |  | Saussurea medusa (Saw-wort).          | ABC71308.1                                                                                                                                                                                                                                                                                                                                                                                                                                      |  | A1XEV4 [T] |  |
| Eukaryota | Chalcone synthase |  | Iris germanica (Flag) (Fleur-de-lis). | BAE53636.1                                                                                                                                                                                                                                                                                                                                                                                                                                      |  | Q2WFX2 [T] |  |



|           |                                |          |                                                         |                           |                |                         |
|-----------|--------------------------------|----------|---------------------------------------------------------|---------------------------|----------------|-------------------------|
| Eukaryota | Chalcone synthase              |          | Aquilaria sinensis.                                     | ABM73434.1                |                | A2I5G2 [T]              |
| Eukaryota | Chalcone synthase, putative    | 2.3.1.74 | Ricinus communis (Castor bean).                         | EEF44265.1                | XP_002518132.1 | B9RWL3                  |
| Eukaryota | DcCHS2                         | 2.3.1.74 | Daucus carota (Carrot).                                 | CAA07245.1                |                | Q9ZS40 [T],<br>Q9ZS40.1 |
| Eukaryota | Naringenin-chalcone synthase   | 2.3.1.74 | Petroselinum crispum (Parsley) (Petroselinum hortense). | CAA24779.1                |                | P16107,<br>P16107.1     |
| Eukaryota | Chalcone synthase              |          | Garcinia mangostana.                                    | ACM62742.1                |                | B9UZ48 [T]              |
| Eukaryota | Chalcone synthase              |          | Hydrangea macrophylla (Bigleaf hydrangea).              | AAN76184.1                |                | Q8GU00                  |
| Eukaryota | Naringenin-chalcone synthase   | 2.3.1.74 | Hydrangea macrophylla (Bigleaf hydrangea).              | BAA32732.1                |                | O82144 [T],<br>O82144.1 |
| Eukaryota | Chalcone synthase              |          | Arachis hypogaea (Peanut).                              | AAO32821.1,<br>ABZ80827.1 |                | Q84XA8 [T]              |
| Eukaryota | Chalcone synthase              |          | Arachis hypogaea (Peanut).                              | AAU43217.1                |                | Q5XVS6                  |
| Eukaryota | Chalcone synthase, putative    | 2.3.1.74 | Ricinus communis (Castor bean).                         | EEF49320.1                | XP_002512817.1 | B9RGV8                  |
| Eukaryota | Chalcone synthase              |          | Litchi chinensis (Lychee).                              | ADB44077.1                |                | D2Y0Z1                  |
| Eukaryota | Chalcone synthase              |          | Litchi chinensis (Lychee).                              | ADB44076.1                |                | D2Y0Z0 [T]              |
| Eukaryota | Naringenin-chalcone synthase 3 | 2.3.1.74 | Ruta graveolens (Common rue).                           | CAC14061.2                |                | Q9FSB7 [T],<br>Q9FSB7.1 |
| Eukaryota | Naringenin-chalcone synthase 2 | 2.3.1.74 | Ruta graveolens (Common rue).                           | CAC14060.1                |                | Q9FSB8 [T],<br>Q9FSB8.1 |

|           |                                  |          |                                                                                       |                           |  |                         |
|-----------|----------------------------------|----------|---------------------------------------------------------------------------------------|---------------------------|--|-------------------------|
| Eukaryota | Naringenin-chalcone synthase 1   | 2.3.1.74 | <i>Ruta graveolens</i> (Common rue).                                                  | CAC14059.1                |  | Q9FSB9 [T],<br>Q9FSB9.1 |
| Eukaryota | Chalcone synthase                |          | <i>Dictamnus albus</i> (Gas plant).                                                   | CAH61575.1                |  | Q5WM49<br>[T]           |
| Eukaryota | Naringenin-chalcone synthase 2   | 2.3.1.74 | <i>Citrus sinensis</i> (Sweet orange).                                                | BAA81664.1                |  | Q9XJ57 [T],<br>Q9XJ57.1 |
| Eukaryota | Chalcone synthase                |          | <i>Citrus unshiu</i> (Satsuma mandarin) ( <i>Citrus nobilis</i> var. <i>unshiu</i> ). | ACQ41890.1                |  | C3VPJ0 [T]              |
| Eukaryota | Chalcone synthase                |          | <i>Citrus sinensis</i> (Sweet orange).                                                | ACB47461.1                |  | C7S7A4                  |
| Eukaryota | Chalcone synthase                | 2.3.1.47 | <i>Citrus maxima</i> (Pomelo) ( <i>Citrus grandis</i> ).                              | ACX37403.1                |  | D0EVE3 [T]              |
| Eukaryota | Naringenin-chalcone synthase     | 2.3.1.74 | <i>Vigna unguiculata</i> (Cowpea).                                                    | CAA52819.1                |  | P51089 [T],<br>P51089.1 |
| Eukaryota | Naringenin-chalcone synthase 17  | 2.3.1.74 | <i>Phaseolus vulgaris</i> (Kidney bean) (French bean).                                | CAA29700.1                |  | P49440 [T],<br>P49440.1 |
| Eukaryota | Chalcone synthase                |          | <i>Glycine max</i> (Soybean) ( <i>Glycine hispida</i> ).                              | ACB37365.1                |  | B2CM86 [T]              |
| Eukaryota | Putative uncharacterized protein |          | <i>Glycine max</i> (Soybean) ( <i>Glycine hispida</i> ).                              | ACU20027.1                |  | C6TDX5 [T]              |
| Eukaryota | Naringenin-chalcone synthase 7   | 2.3.1.74 | <i>Glycine max</i> (Soybean) ( <i>Glycine hispida</i> ).                              | AAA33950.1                |  | P30081,<br>P30081.1     |
| Eukaryota | Naringenin-chalcone synthase     | 2.3.1.74 | <i>Pueraria lobata</i> (Kudzu vine).                                                  | BAA01075.1,<br>BAA09918.1 |  | P23569 [T],<br>P23569.1 |
| Eukaryota | Putative uncharacterized protein |          | <i>Glycine max</i> (Soybean) ( <i>Glycine hispida</i> ).                              | ACU21426.1                |  | C6THX4 [T]              |
| Eukaryota | Chalcone synthase                |          | <i>Glycine max</i> (Soybean) ( <i>Glycine hispida</i> ).                              | AAO67373.1                |  | Q84V87                  |

|           |                                |          |                                          |            |  |                         |                                                                                                                                       |
|-----------|--------------------------------|----------|------------------------------------------|------------|--|-------------------------|---------------------------------------------------------------------------------------------------------------------------------------|
| Eukaryota | Chalcone synthase              |          | Glycine soja (Wild soybean).             | ACT32034.1 |  | D1FYG0 [T]              |                                                                                                                                       |
| Eukaryota | Chalcone synthase              |          | Glycyrrhiza uralensis.                   | ABM66532.1 |  | B2KK56 [T]              |                                                                                                                                       |
| Eukaryota | Chalcone synthase              | 2.3.1.74 | Glycyrrhiza inflata.                     | ACH67480.1 |  | C4MJ52 [T]              |                                                                                                                                       |
| Eukaryota | Naringenin-chalcone synthase 2 | 2.3.1.74 | Medicago sativa (Alfalfa).               | AAA02824.1 |  | P30074 [P],<br>P30074.1 | 1B15,<br>1BQ6,<br>1CGK,<br>1CGZ,<br>1CHW,<br>1CML,<br>1D6F,<br>1D6H,<br>1D6I, 1I86,<br>1I88, 1I89,<br>1I8B,<br>1JWX,<br>1UOV,<br>1UOW |
| Eukaryota | Chalcone synthase              |          | Robinia pseudoacacia (Black locust).     | ACF94720.2 |  | B6S394 [T]              |                                                                                                                                       |
| Eukaryota | Naringenin-chalcone synthase   | 2.3.1.74 | Onobrychis viciifolia (Common sainfoin). | AAB81987.1 |  | O22586 [T],<br>O22586.1 |                                                                                                                                       |
| Eukaryota | Naringenin-chalcone synthase 1 | 2.3.1.74 | Medicago sativa (Alfalfa).               | AAA02823.1 |  | P30073 [T],<br>P30073.1 |                                                                                                                                       |
| Eukaryota | Naregenin-chalcone synthase 6  | 2.3.1.74 | Pisum sativum (Garden pea).              | CAA44935.1 |  | Q01288 [T],<br>Q01288.1 |                                                                                                                                       |
| Eukaryota | Naregenin-chalcone synthase 3  | 2.3.1.74 | Pisum sativum (Garden pea).              | BAA22043.1 |  | O23883,<br>O23883.1     |                                                                                                                                       |

|           |                                  |          |                                                                               |                           |  |                            |
|-----------|----------------------------------|----------|-------------------------------------------------------------------------------|---------------------------|--|----------------------------|
| Eukaryota | Naregenin-chalcone synthase 4    | 2.3.1.74 | Pisum sativum (Garden pea).                                                   | BAA22042.1                |  | O23882,<br>O23882.1        |
| Eukaryota | Naregenin-chalcone synthase 5    | 2.3.1.74 | Pisum sativum (Garden pea).                                                   | BAA22044.1                |  | O23884,<br>O23884.1        |
| Eukaryota | Naregenin-chalcone synthase 2    | 2.3.1.74 | Pisum sativum (Garden pea).                                                   | BAA01513.1,<br>CAA44934.1 |  | Q01287 [T],<br>Q01287.1    |
| Eukaryota | Naregenin-chalcone synthase 1    | 2.3.1.74 | Pisum sativum (Garden pea).                                                   | BAA01512.1,<br>CAA44933.1 |  | Q01286 [T],<br>Q01286.1    |
| Eukaryota | Naringenin-chalcone synthase 1   | 2.3.1.74 | Cicer arietinum (Chickpea) (Garbanzo).                                        | CAA10190.1                |  | Q9SML4<br>[T],<br>Q9SML4.1 |
| Eukaryota | Chalcone synthase                | 2.3.1.74 | Cicer arietinum (Chickpea) (Garbanzo).                                        | CAA10131.1                |  | Q9ZRV7 [T]                 |
| Eukaryota | Chalcone synthase                |          | Astragalus mongholicus (Huang qi) (Astragalus membranaceus var. mongholicus). | AAZ73731.1,<br>CAJ20138.1 |  | Q4A1N4 [T]                 |
| Eukaryota | Naringenin-chalcone synthase 4-1 | 2.3.1.74 | Medicago sativa (Alfalfa).                                                    | AAB41561.1                |  | P51077 [T],<br>P51077.1    |
| Eukaryota | Naringenin-chalcone synthase 9   | 2.3.1.74 | Medicago sativa (Alfalfa).                                                    | AAA02827.1                |  | P30077 [T],<br>P30077.1    |
| Eukaryota | Naringenin-chalcone synthase 8   | 2.3.1.74 | Medicago sativa (Alfalfa).                                                    | AAA02826.1                |  | P30076 [T],<br>P30076.1    |
| Eukaryota | Naringenin-chalcone synthase 4-2 | 2.3.1.74 | Medicago sativa (Alfalfa).                                                    | AAB41560.1,<br>CAA48226.1 |  | P51078 [T],<br>P51078.1    |
| Eukaryota | Putative uncharacterized protein |          | Medicago truncatula (Barrel medic).                                           | ACJ85339.1                |  | B7FKQ5 [T]                 |

|           |                                |          |                                               |                           |  |                         |                                                                                                                                       |
|-----------|--------------------------------|----------|-----------------------------------------------|---------------------------|--|-------------------------|---------------------------------------------------------------------------------------------------------------------------------------|
| Eukaryota | Naringenin-chalcone synthase 2 | 2.3.1.74 | Medicago sativa (Alfalfa).                    | AAA02824.1                |  | P30074 [P],<br>P30074.1 | 1B15,<br>1BQ6,<br>1CGK,<br>1CGZ,<br>1CHW,<br>1CML,<br>1D6F,<br>1D6H,<br>1D6I, 1I86,<br>1I88, 1I89,<br>1I8B,<br>1JWX,<br>1U0V,<br>1U0W |
| Eukaryota | Putative chalcone synthase     |          | Medicago truncatula (Barrel medic).           | CAC20725.1                |  | Q9FEW4 [T]              |                                                                                                                                       |
| Eukaryota | Naringenin-chalcone synthase 1 | 2.3.1.74 | Trifolium subterraneum (Subterranean clover). | AAA18176.1                |  | P51083,<br>P51083.1     |                                                                                                                                       |
| Eukaryota | CHS12-1                        | 2.3.1.74 | Medicago sativa (Alfalfa).                    | AAA02825.1,<br>AAB41559.1 |  | P30075 [T],<br>P30075.2 |                                                                                                                                       |
| Eukaryota | CHS12-1                        | 2.3.1.74 | Medicago sativa (Alfalfa).                    | AAA02825.1,<br>AAB41559.1 |  | P30075 [T],<br>P30075.2 |                                                                                                                                       |
| Eukaryota | Naringenin-chalcone synthase 6 | 2.3.1.74 | Trifolium subterraneum (Subterranean clover). | AAA67701.1                |  | P51088 [T],<br>P51088.1 |                                                                                                                                       |
| Eukaryota | Naringenin-chalcone synthase 5 | 2.3.1.74 | Trifolium subterraneum (Subterranean clover). | AAA73939.1                |  | P51087 [T],<br>P51087.1 |                                                                                                                                       |
| Eukaryota | Naringenin-chalcone synthase 3 | 2.3.1.74 | Trifolium subterraneum (Subterranean clover). | AAA73937.1                |  | P51085 [T],<br>P51085.1 |                                                                                                                                       |
| Eukaryota | Naringenin-chalcone synthase 4 | 2.3.1.74 | Trifolium subterraneum (Subterranean clover). | AAA73938.1                |  | P51086 [T],<br>P51086.1 |                                                                                                                                       |

|           |                                 |          |                                               |            |  |                     |
|-----------|---------------------------------|----------|-----------------------------------------------|------------|--|---------------------|
| Eukaryota | Naringenin-chalcone synthase 2  | 2.3.1.74 | Trifolium subterraneum (Subterranean clover). | AAA18177.1 |  | P51084,<br>P51084.1 |
| Eukaryota | Chalcone synthase               |          | Lupinus luteus (European yellow lupin).       | ABF59866.1 |  | Q1G1M4<br>[T]       |
| Eukaryota | Chalcone synthase               |          | Lupinus luteus (European yellow lupin).       | AAP37052.1 |  | Q7Y1X9 [T]          |
| Eukaryota | Chalcone synthase               |          | Lupinus luteus (European yellow lupin).       | ABF59865.1 |  | Q1G1M5<br>[T]       |
| Eukaryota | Chalcone synthase               |          | Lupinus albus (White lupin).                  | ABV23279.1 |  | A7Y7F2 [T]          |
| Eukaryota | Chalcone synthase               |          | Lupinus luteus (European yellow lupin).       | AAP37051.1 |  | Q7Y1Y0 [T]          |
| Eukaryota | Chalcone synthase               |          | Lupinus luteus (European yellow lupin).       | ABF59868.1 |  | Q1G1M2              |
| Eukaryota | Chalcone synthase               |          | Lupinus luteus (European yellow lupin).       | ABF59867.1 |  | Q1G1M3              |
| Eukaryota | Root-specific chalcone synthase | 2.3.1.74 | Senna alata.                                  | AAM00230.1 |  | Q8S4Y8 [T]          |
| Eukaryota | Root-specific chalcone synthase | 2.3.1.74 | Senna alata.                                  | AAM00232.1 |  | Q8S4Y6 [T]          |
| Eukaryota | Naringenin-chalcone synthase 1A | 2.3.1.74 | Pisum sativum (Garden pea).                   | CAA56316.1 |  | P51081,<br>P51081.1 |
| Eukaryota | Chalcone synthase               |          | Clitoria ternatea (Butterfly pea).            | BAF49290.1 |  | A4F1Q7 [T]          |
| Eukaryota | Root-specific chalcone synthase | 2.3.1.74 | Senna alata.                                  | AAM00231.1 |  | Q8S4Y7 [T]          |
| Eukaryota | Chalcone synthase               |          | Robinia pseudoacacia (Black locust).          | ACF94721.1 |  | B6S395 [T]          |

|           |                                 |          |                                          |                                                                                                      |  |                                |
|-----------|---------------------------------|----------|------------------------------------------|------------------------------------------------------------------------------------------------------|--|--------------------------------|
| Eukaryota | Chalcone synthase               |          | Senna tora.                              | ACB78187.1                                                                                           |  | D3G7Y0 [T]                     |
| Eukaryota | Chalcone synthase               |          | Robinia pseudoacacia (Black locust).     | ACF94722.1                                                                                           |  | B6S396 [T]                     |
| Eukaryota | Chalcone synthase               | 2.3.1.74 | Pisum sativum (Garden pea).              | BAA22045.1                                                                                           |  | O23885                         |
| Eukaryota | Naringenin-chalcone synthase 1B | 2.3.1.74 | Pisum sativum (Garden pea).              | CAA56317.1                                                                                           |  | P51082,<br>P51082.1            |
| Eukaryota | Chalcone synthase               |          | Robinia pseudoacacia (Black locust).     | ACF94724.1                                                                                           |  | B6S398 [T]                     |
| Eukaryota | Naringenin-chalcone synthase 6  | 2.3.1.74 | Glycine max (Soybean) (Glycine hispida). | AAA33951.1                                                                                           |  | P30080,<br>P30080.1            |
| Eukaryota | Chalcone synthase 9             |          | Glycine max (Soybean) (Glycine hispida). | ABQ63059.1                                                                                           |  | B3F5J6                         |
| Eukaryota | Naringenin-chalcone synthase 2  | 2.3.1.74 | Glycine max (Soybean) (Glycine hispida). | CAA36317.1,<br>CAA46590.1                                                                            |  | P17957,<br>P17957.1            |
| Eukaryota | Chalcone synthase CHS4          |          | Glycine max (Soybean) (Glycine hispida). | AAQ62588.1,<br>AAQ62595.1                                                                            |  | Q6X0N0                         |
| Eukaryota | Chalcone synthase 1             |          | Glycine max (Soybean) (Glycine hispida). | ABB30178.1                                                                                           |  | Q306X5 [T]                     |
| Eukaryota | Chalcone synthase CHS1          | 2.3.1.74 | Glycine max (Soybean) (Glycine hispida). | AAQ62590.1,<br>AAQ62597.1,<br>BAB71954.1,<br>BAF62128.1,<br>BAH70473.1,<br>BAH70474.1,<br>CAA38456.1 |  | P24826,<br>P24826.1,<br>Q6X0M8 |
| Eukaryota | Naringenin-chalcone synthase 5  | 2.3.1.74 | Glycine max (Soybean) (Glycine hispida). | AAB01004.1                                                                                           |  | P48406,<br>P48406.1            |

|           |                                  |          |                                                                                                                 |                                          |                |                            |  |
|-----------|----------------------------------|----------|-----------------------------------------------------------------------------------------------------------------|------------------------------------------|----------------|----------------------------|--|
| Eukaryota | Naringenin-chalcone synthase 2   | 2.3.1.74 | Glycine max (Soybean) ( <i>Glycine hispida</i> ).                                                               | CAA36317.1,<br>CAA46590.1                |                | P17957,<br>P17957.1        |  |
| Eukaryota | Naringenin-chalcone synthase 3   | 2.3.1.74 | Glycine max (Soybean) ( <i>Glycine hispida</i> ).                                                               | CAA37909.1                               |                | P19168,<br>P19168.1        |  |
| Eukaryota | Chalcone synthase CHS3           | 2.3.1.74 | Glycine max (Soybean) ( <i>Glycine hispida</i> ).                                                               | AAQ62589.1,<br>AAQ62596.1,<br>ACN81822.1 |                | Q6X0M9<br>[T]              |  |
| Eukaryota | Naringenin-chalcone synthase     | 2.3.1.74 | <i>Betula verrucosa</i> (White birch) ( <i>Betula pendula</i> ).                                                | CAA54649.1,<br>CAA71904.1                |                | P51075 [T],<br>P51075.2    |  |
| Eukaryota | Putative uncharacterized protein |          | <i>Populus trichocarpa</i> (Western balsam poplar)<br>( <i>Populus balsamifera</i> subsp. <i>trichocarpa</i> ). | ABD24226.1,<br>ABK95168.1,<br>EEE99396.1 | XP_002321081.1 | Q2ENC2 [T]                 |  |
| Eukaryota | Chalcone synthase                |          | <i>Populus alba</i> (White poplar).                                                                             | ABC86919.1                               |                | Q2HZ40                     |  |
| Eukaryota | Chalcone synthase                |          | <i>Populus alba</i> (White poplar).                                                                             | ABD24222.1,<br>ABD24224.1,<br>ABD24225.1 |                | Q2ENC4 [T]                 |  |
| Eukaryota | Polyketide synthase 4            |          | <i>Rubus idaeus</i> (Raspberry).                                                                                | ABV54602.1                               |                | B0LDU5                     |  |
| Eukaryota | Chalcone synthase                |          | <i>Hypericum perforatum</i> (St. John's wort).                                                                  | AAL67805.1                               |                | Q8W123<br>[T]              |  |
| Eukaryota | Naringenin-chalcone synthase     | 2.3.1.74 | <i>Hypericum androsaemum</i> (Tutsan).                                                                          | AAG30295.1                               |                | Q9FUB7<br>[P],<br>Q9FUB7.1 |  |
| Eukaryota | Aromatic polyketide synthase     |          | <i>Hypericum hookerianum</i> .                                                                                  | ABM63466.1                               |                | A2IBD1 [T]                 |  |
| Eukaryota | Chalcone synthase                | 2.3.1.74 | <i>Populus trichocarpa</i> (Western balsam poplar)<br>( <i>Populus balsamifera</i> subsp. <i>trichocarpa</i> ). | EEE78798.1                               | XP_002303819.1 | B9H086                     |  |
| Eukaryota | Naringenin-chalcone synthase 1   | 2.3.1.74 | <i>Citrus sinensis</i> (Sweet orange).                                                                          | BAA81663.1                               |                | Q9XJ58 [T],<br>Q9XJ58.1    |  |
| Eukaryota | Chalcone synthase                |          | <i>Cannabis sativa</i> (Hemp) (Marijuana).                                                                      | AAL92879.1                               |                | Q8RVK9 [T]                 |  |



|           |                                                                        |          |                                       |            |                |                         |  |
|-----------|------------------------------------------------------------------------|----------|---------------------------------------|------------|----------------|-------------------------|--|
| Eukaryota | Chalcone synthase                                                      | 2.3.1.74 | Humulus lupulus (European hop).       | CAC19808.1 |                | Q9FEY5                  |  |
| Eukaryota | Naringenin-chalcone synthase                                           | 2.3.1.74 | Humulus lupulus (European hop).       | ACM17224.1 |                | B9VI85 [T]              |  |
| Eukaryota | Naringenin-chalcone synthase                                           | 2.3.1.74 | Humulus lupulus (European hop).       | CAK19317.1 |                | A0AMG7                  |  |
| Eukaryota | Naringenin-chalcone synthase                                           | 2.3.1.74 | Humulus lupulus (European hop).       | CAK19318.1 |                | A0AMG8 [T]              |  |
| Eukaryota | Naringenin-chalcone synthase                                           | 2.3.1.74 | Humulus lupulus (European hop).       | CAK19319.1 |                | A0AMG9 [T]              |  |
| Eukaryota | Naringenin-chalcone synthase                                           | 2.3.1.74 | Vitis vinifera (Grape).               | CAA53583.1 |                | P51090 [T],<br>P51090.1 |  |
| Eukaryota | Chalcone synthase                                                      | 2.3.1.74 | Vitis vinifera (Grape).               | ABM67586.1 | XP_002276946.1 | A2ICC5 [T]              |  |
| Eukaryota | CHS4                                                                   |          | Vitis labrusca x Vitis vinifera.      | ACS36661.1 |                | D1FXH3 [T]              |  |
| Eukaryota | Chalcone synthase                                                      | 2.3.1.74 | Vitis vinifera (Grape).               | BAA31259.1 |                | O80407                  |  |
| Eukaryota | Chalcone synthase                                                      |          | Vitis rotundifolia (Muscadine grape). | ACN30003.1 |                | C0KXH3 [T]              |  |
| Eukaryota | Chalcone synthase                                                      | 2.3.1.74 | Vitis vinifera (Grape).               | BAB84112.1 |                | Q8W3P5                  |  |
| Eukaryota | Whole genome shotgun sequence of line PN40024, scaffold_68.assembly12x |          | Vitis vinifera (Grape).               | CBI21259.3 |                | D7SVG0                  |  |
| Eukaryota | Chalcone synthase                                                      |          | Vitis vinifera (Grape).               | AAB72091.1 |                | O22519 [T]              |  |
| Eukaryota | PREDICTED: chalcone synthase                                           |          | Vitis vinifera                        |            | XP_002276921.1 |                         |  |

|           |                                  |          |                                                                                       |                           |                |            |  |
|-----------|----------------------------------|----------|---------------------------------------------------------------------------------------|---------------------------|----------------|------------|--|
| Eukaryota | Chalcone synthase                |          | Prunus cerasifera (cherry plum).                                                      | ABH11545.1                |                | Q0MRE1 [T] |  |
| Eukaryota | Putative uncharacterized protein | 2.3.1.74 | Vitis vinifera (Grape).                                                               | BAB84111.1,<br>CAN75038.1 | XP_002264019.1 | Q8W3P6     |  |
| Eukaryota | Chalcone synthase                |          | Malus domestica (Apple) (Pyrus malus).                                                | AAY45748.1,<br>ACJ54533.1 |                | Q4TZJ6 [T] |  |
| Eukaryota | Chalcone synthase                |          | Malus domestica (Apple) (Pyrus malus).                                                | ACJ54531.1                |                | B8R6A2 [T] |  |
| Eukaryota | Chalcone synthase                | 2.3.1.74 | Pyrus communis (Pear).                                                                | ABI79305.1                |                | Q06FE4 [T] |  |
| Eukaryota | Chalcone synthase                |          | Pyrus communis (Pear).                                                                | AAX16494.1                |                | A7MAS6 [T] |  |
| Eukaryota | Chalcone synthase                | 2.3.1.74 | Sorbus aucuparia (European mountain ash) (Rowan).                                     | ABB89213.1                |                | Q27Z06 [T] |  |
| Eukaryota | Chalcone synthase                |          | Malus domestica (Apple) (Pyrus malus).                                                | AAX16492.1,<br>ACJ54530.1 |                | A7MAS4 [T] |  |
| Eukaryota | Chalcone synthase                |          | Malus domestica (Apple) (Pyrus malus).                                                | ACJ54532.1,<br>BAB92996.1 |                | Q8L5N6 [T] |  |
| Eukaryota | Chalcone synthase                |          | Abelmoschus manihot (Sweet hibiscus) (Hibiscus manihot).                              | ACE60221.1                |                | B7SQE0 [T] |  |
| Eukaryota | Chalcone synthase 1              |          | Gossypium hirsutum (Upland cotton) (Gossypium mexicanum).                             | ACV72638.1                |                | C8YQU8 [T] |  |
| Eukaryota | Chalcone synthase                |          | Gossypium hirsutum (Upland cotton) (Gossypium mexicanum).                             | ABS52573.1                |                | A7L2Z4 [T] |  |
| Eukaryota | Chalcone synthase                |          | Gossypium hirsutum (Upland cotton) (Gossypium mexicanum).                             | ACH56521.1                |                | B5LXY1 [T] |  |
| Eukaryota | Chalcone synthase                | 2.3.1.74 | Populus trichocarpa (Western balsam poplar) (Populus balsamifera subsp. trichocarpa). | EEE78799.1                | XP_002303820.1 | B9H087     |  |

|           |                                  |          |                                                                                          |                           |                |                         |  |
|-----------|----------------------------------|----------|------------------------------------------------------------------------------------------|---------------------------|----------------|-------------------------|--|
| Eukaryota | Chalcone synthase                | 2.3.1.74 | Populus trichocarpa (Western balsam poplar)<br>(Populus balsamifera subsp. trichocarpa). | EEE78800.1                | XP_002303821.1 | B9H088                  |  |
| Eukaryota | Chalcone synthase                | 2.3.1.74 | Populus trichocarpa (Western balsam poplar)<br>(Populus balsamifera subsp. trichocarpa). | EEF06787.1                | XP_002337752.1 | B9P9S8                  |  |
| Eukaryota | Putative uncharacterized protein | 2.3.1.74 | Populus trichocarpa (Western balsam poplar)<br>(Populus balsamifera subsp. trichocarpa). | ABK95125.1,<br>EEE84087.1 | XP_002299282.1 | A9PFH2 [T]              |  |
| Eukaryota | Chalcone synthase                | 2.3.1.74 | Populus trichocarpa (Western balsam poplar)<br>(Populus balsamifera subsp. trichocarpa). | EEE84086.1                | XP_002299281.1 | B9GMG1                  |  |
| Eukaryota | Naringenin-chalcone synthase 2   | 2.3.1.74 | Camellia sinensis (Tea).                                                                 | BAA05641.1                |                | P48387 [T],<br>P48387.1 |  |
| Eukaryota | Chalcone synthase                |          | Camellia sinensis (Tea).                                                                 | AAT75302.1                |                | Q690N1 [T]              |  |
| Eukaryota | Naringenin-chalcone synthase 3   | 2.3.1.74 | Camellia sinensis (Tea).                                                                 | BAA05642.1                |                | P48388 [T],<br>P48388.1 |  |
| Eukaryota | Chalcone synthase                |          | Rhododendron simsii (Sims's rhododendron).                                               | CAC88858.1                |                | Q8L6D2 [T]              |  |
| Eukaryota | Chalcone synthase                |          | Camellia sinensis (Tea).                                                                 | AAO13091.1                |                | Q5VLQ5 [T]              |  |
| Eukaryota | Chalcone synthase                |          | Camellia japonica.                                                                       | BAI66465.1                |                | D2KX93 [T]              |  |
| Eukaryota | Naringenin-chalcone synthase 1   | 2.3.1.74 | Camellia sinensis (Tea).                                                                 | BAA05640.1                |                | P48386 [T],<br>P48386.1 |  |
| Eukaryota | Naringenin-chalcone synthase     | 2.3.1.74 | Juglans nigra x Juglans regia.                                                           | CAA64452.1                |                | Q42864 [T]              |  |
| Eukaryota | Naringenin-chalcone synthase     | 2.3.1.74 | Juglans nigra x Juglans regia.                                                           | CAA64366.1                |                | Q42865 [T]              |  |
| Eukaryota | Chalcone synthase                |          | Nelumbo nucifera (Sacred lotus).                                                         | ADD74168.1                |                | D6C6K7 [T]              |  |

|           |                              |          |                                  |                                                         |  |                         |
|-----------|------------------------------|----------|----------------------------------|---------------------------------------------------------|--|-------------------------|
| Eukaryota | Chalcone synthase            |          | Nelumbo nucifera (Sacred lotus). | ADD74167.1                                              |  | D6C6K6 [T]              |
| Eukaryota | Chalcone synthase            |          | Nelumbo nucifera (Sacred lotus). | ADD74169.1,<br>ADD74170.1,<br>ADD74171.1,<br>ADD74172.1 |  | D6C6K8 [T]              |
| Eukaryota | Naringenin-chalcone synthase | 2.3.1.74 | Casuarina glauca (Swamp oak).    | CAA10641.1                                              |  | Q9ZRR8 [T],<br>Q9ZRR8.1 |
| Eukaryota | Chalcone synthase 6          |          | Rubus idaeus (Raspberry).        | AAM90652.1                                              |  | Q8L5L2 [T]              |
| Eukaryota | Aromatic polyketide synthase |          | Rubus idaeus (Raspberry).        | AAK15174.1,<br>ACF72868.1                               |  | Q9AU11                  |
| Eukaryota | Aromatic polyketide synthase |          | Rubus idaeus (Raspberry).        | AAK15175.1                                              |  | Q9AU10                  |
| Eukaryota | Aromatic polyketide synthase |          | Rubus idaeus (Raspberry).        | AAK15176.1                                              |  | Q9AU09                  |
| Eukaryota | Chalcone synthase 5          |          | Rubus idaeus (Raspberry).        | AAM90650.1                                              |  | Q8L5L4 [T]              |
| Eukaryota | Chalcone synthase 11         |          | Rubus idaeus (Raspberry).        | AAM90651.1                                              |  | Q8L5L3 [T]              |
| Eukaryota | Polyketide synthase 5        |          | Rubus idaeus (Raspberry).        | ABV54603.1                                              |  | B0LDU6                  |
| Eukaryota | Chalcone synthase            |          | Rosa hybrid cultivar.            | BAC66467.1                                              |  | Q84UT9 [T]              |
| Eukaryota | Chalcone synthase            |          | Fragaria ananassa (Strawberry).  | BAE17123.1                                              |  | Q4AE09 [T]              |
| Eukaryota | Chalcone synthase            |          | Fragaria ananassa (Strawberry).  | BAE17122.1                                              |  | Q4AE10 [T]              |

|           |                                   |          |                                                                             |            |  |                         |
|-----------|-----------------------------------|----------|-----------------------------------------------------------------------------|------------|--|-------------------------|
| Eukaryota | Chalcone synthase                 |          | <i>Fragaria ananassa</i> (Strawberry).                                      | AAX99413.1 |  | Q52NH6 [T]              |
| Eukaryota | Chalcone synthase                 |          | <i>Fragaria ananassa</i> (Strawberry).                                      | BAE17124.1 |  | Q4AE08 [T]              |
| Eukaryota | Chalcone synthase                 |          | <i>Eustoma grandiflorum</i> (Bluebells) ( <i>Lisianthus russellianus</i> ). | BAD34456.1 |  | Q6BEH5 [T]              |
| Eukaryota | Chalcone synthase                 |          | <i>Eustoma grandiflorum</i> (Bluebells) ( <i>Lisianthus russellianus</i> ). | BAD34457.1 |  | Q6BEH4 [T]              |
| Eukaryota | Naringenin-chalcone synthase LF4  | 2.3.1.74 | <i>Ipomoea batatas</i> (Sweet potato) ( <i>Convolvulus batatas</i> ).       | BAA90329.1 |  | Q9MB39 [T],<br>Q9MB39.1 |
| Eukaryota | Naringenin-chalcone synthase LF2  | 2.3.1.74 | <i>Ipomoea batatas</i> (Sweet potato) ( <i>Convolvulus batatas</i> ).       | BAA90327.1 |  | Q9MB41 [T],<br>Q9MB41.1 |
| Eukaryota | Naringenin-chalcone synthase DIII | 2.3.1.74 | <i>Ipomoea batatas</i> (Sweet potato) ( <i>Convolvulus batatas</i> ).       | BAA90331.1 |  | Q9MB37 [T],<br>Q9MB37.1 |
| Eukaryota | Naringenin-chalcone synthase DII  | 2.3.1.74 | <i>Ipomoea batatas</i> (Sweet potato) ( <i>Convolvulus batatas</i> ).       | BAA90330.1 |  | Q9MB38 [T],<br>Q9MB38.1 |
| Eukaryota | Naringenin-chalcone synthase LF1  | 2.3.1.74 | <i>Ipomoea batatas</i> (Sweet potato) ( <i>Convolvulus batatas</i> ).       | BAA90486.1 |  | Q9MB33 [T],<br>Q9MB33.1 |
| Eukaryota | Naringenin-chalcone synthase DIV  | 2.3.1.74 | <i>Ipomoea batatas</i> (Sweet potato) ( <i>Convolvulus batatas</i> ).       | BAA90332.1 |  | Q9MB36 [T],<br>Q9MB36.1 |
| Eukaryota | Chalcone synthase                 |          | <i>Ipomoea batatas</i> (Sweet potato) ( <i>Convolvulus batatas</i> ).       | BAA75310.1 |  | Q9ZQS6 [T]              |
| Eukaryota | Chalcone synthase                 | 2.3.1.74 | <i>Ipomoea batatas</i> (Sweet potato) ( <i>Convolvulus batatas</i> ).       | ABY68457.1 |  | B0FY9 [T]               |
| Eukaryota | Naringenin-chalcone synthase LF3  | 2.3.1.74 | <i>Ipomoea batatas</i> (Sweet potato) ( <i>Convolvulus batatas</i> ).       | BAA90328.1 |  | Q9MB40 [T],<br>Q9MB40.1 |
| Eukaryota | Chalcone synthase                 |          | <i>Ipomoea trifida</i> (Morning glory).                                     | AAP82024.1 |  | Q6X3Y1                  |

|           |                              |          |                                                                               |                                                         |  |                                    |
|-----------|------------------------------|----------|-------------------------------------------------------------------------------|---------------------------------------------------------|--|------------------------------------|
| Eukaryota | Chalcone synthase            |          | <i>Ipomoea alba</i> (Moonflower).                                             | AAP82019.1                                              |  | Q6X3X2 [T]                         |
| Eukaryota | Chalcone synthase            |          | <i>Ipomoea purpurea</i> (Common morning glory) ( <i>Pharbitis purpurea</i> ). | AAK39114.1                                              |  | Q94KJ3                             |
| Eukaryota | Chalcone synthase            | 2.3.1.74 | <i>Ipomoea nil</i> (Japanese morning glory) ( <i>Pharbitis nil</i> ).         | BAA21787.1,<br>BAA87336.1,<br>BAH28850.1,<br>BAH28851.1 |  | O22045 [T],<br>O22045.1,<br>Q54AG9 |
| Eukaryota | Chalcone synthase            |          | <i>Ipomoea purpurea</i> (Common morning glory) ( <i>Pharbitis purpurea</i> ). | AAK39113.1                                              |  | Q94KJ4                             |
| Eukaryota | Chalcone synthase            |          | <i>Ipomoea purpurea</i> (Common morning glory) ( <i>Pharbitis purpurea</i> ). | AAK39110.1                                              |  | Q94KJ6                             |
| Eukaryota | Chalcone synthase            |          | <i>Ipomoea purpurea</i> (Common morning glory) ( <i>Pharbitis purpurea</i> ). | AAK39112.1                                              |  | Q94KJ5                             |
| Eukaryota | Chalcone synthase D          |          | <i>Ipomoea purpurea</i> (Common morning glory) ( <i>Pharbitis purpurea</i> ). | ABW69675.1                                              |  | B4XF28 [T]                         |
| Eukaryota | Chalcone synthase            |          | <i>Ipomoea purpurea</i> (Common morning glory) ( <i>Pharbitis purpurea</i> ). | AAK39111.1,<br>AAK39115.1,<br>BAA20387.1,<br>BAA36224.1 |  | O04934 [T]                         |
| Eukaryota | Chalcone synthase            |          | <i>Ipomoea purpurea</i> (Common morning glory) ( <i>Pharbitis purpurea</i> ). | AAB41103.1                                              |  | Q96568 [T]                         |
| Eukaryota | Chalcone synthase            | 2.3.1.74 | <i>Ipomoea nil</i> (Japanese morning glory) ( <i>Pharbitis nil</i> ).         | BAA21788.1,<br>BAA87338.1                               |  | O22046 [T],<br>O22046.1,<br>Q54AG8 |
| Eukaryota | Chalcone synthase            | 2.3.1.74 | <i>Ipomoea purpurea</i> (Common morning glory) ( <i>Pharbitis purpurea</i> ). | BAA21789.1,<br>BAA87337.1                               |  | O22047 [T],<br>O22047.1,<br>Q76MX1 |
| Eukaryota | Naringenin-chalcone synthase | 2.3.1.74 | <i>Catharanthus roseus</i> (Madagascar periwinkle) ( <i>Vinca rosea</i> ).    | CAA10511.1                                              |  | Q9ZRS4 [T],<br>Q9ZRS4.1            |

|           |                                 |          |                                                                   |                           |  |                         |
|-----------|---------------------------------|----------|-------------------------------------------------------------------|---------------------------|--|-------------------------|
| Eukaryota | Chalcone synthase               |          | Solanum pinnatisectum (tansyleaf nightshade).                     | AAX63402.1                |  | Q56179 [T]              |
| Eukaryota | Naringenin-chalcone synthase 1  | 2.3.1.74 | Solanum lycopersicum (Tomato) ( <i>Lycopersicon esculentum</i> ). | CAA38980.1                |  | P23418 [T],<br>P23418.2 |
| Eukaryota | Naringenin-chalcone synthase 1B | 2.3.1.74 | Solanum tuberosum (Potato).                                       | AAB67735.1                |  | Q43163 [T],<br>Q43163.1 |
| Eukaryota | Naringenin-chalcone synthase 1A | 2.3.1.74 | Solanum tuberosum (Potato).                                       | AAB67734.1                |  | Q41436 [T],<br>Q41436.1 |
| Eukaryota | Chalcone synthase               |          | Capsicum annuum (Bell pepper).                                    | ACN60400.1                |  | COLF60 [T]              |
| Eukaryota | Naringenin-chalcone synthase 2  | 2.3.1.74 | Solanum lycopersicum (Tomato) ( <i>Lycopersicon esculentum</i> ). | CAA38981.1                |  | P23419 [T],<br>P23419.2 |
| Eukaryota | Naringenin-chalcone synthase 2  | 2.3.1.74 | Solanum tuberosum (Potato).                                       | AAB05239.1                |  | Q43188 [T],<br>Q43188.1 |
| Eukaryota | Chalcone synthase               |          | Nierembergia sp. NB17.                                            | BAC10998.1                |  | Q8LP19 [T]              |
| Eukaryota | Naringenin-chalcone synthase J  | 2.3.1.74 | Petunia hybrida (Petunia).                                        | CAA32737.1,<br>CAA32739.1 |  | P22928 [T],<br>P22928.2 |
| Eukaryota | Naringenin-chalcone synthase J  | 2.3.1.74 | Petunia hybrida (Petunia).                                        | CAA32737.1,<br>CAA32739.1 |  | P22928 [T],<br>P22928.2 |
| Eukaryota | Chalcone synthase               | 2.3.1.74 | Petunia hybrida (Petunia).                                        | AAF60297.1                |  | Q9M5B2<br>[T]           |
| Eukaryota | Chalcone synthase               |          | Petunia hybrida (Petunia).                                        | AAB36038.1                |  | Q43040 [T]              |
| Eukaryota | Naringenin-chalcone synthase A  | 2.3.1.74 | Petunia hybrida (Petunia).                                        | CAA27718.1,<br>CAA32731.1 |  | P08894 [T],<br>P08894.1 |
| Eukaryota | Naringenin-chalcone synthase A  | 2.3.1.74 | Petunia hybrida (Petunia).                                        | CAA27718.1,<br>CAA32731.1 |  | P08894 [T],<br>P08894.1 |

|           |                              |          |                                                                                  |                        |  |                      |
|-----------|------------------------------|----------|----------------------------------------------------------------------------------|------------------------|--|----------------------|
| Eukaryota | Chalcone synthase            |          | <i>Nicotiana benthamiana</i> .                                                   | ABN80439.1             |  | A3RK79 [T]           |
| Eukaryota | Chalcone synthase            |          | <i>Nicotiana alata</i> (Winged tobacco) (Persian tobacco).                       | ACS12837.1             |  | C5IWS6 [T]           |
| Eukaryota | Chalcone synthase            |          | <i>Nicotiana tomentosiformis</i> (Tobacco).                                      | ACS12836.1             |  | C5IWS5 [T]           |
| Eukaryota | Chalcone synthase            |          | <i>Nicotiana tabacum</i> (Common tobacco).                                       | AAK49457.1             |  | Q93XP8 [T]           |
| Eukaryota | Chalcone synthase            |          | <i>Gentiana triflora</i> (Clustered gentian).                                    | BAE45039.1             |  | Q3M003 [T]           |
| Eukaryota | Chalcone synthase            |          | <i>Mimulus aurantiacus</i> (Bush monkey flower) ( <i>Diplacus aurantiacus</i> ). | ACA04008.1             |  | B7SJG7 [T]           |
| Eukaryota | Chalcone synthase            |          | <i>Mazus pumilus</i> (Japanese mazus) ( <i>Lobelia pumila</i> ).                 | AAN05791.1             |  | Q7XB37 [T]           |
| Eukaryota | Chalcone synthase            |          | <i>Digitalis lanata</i> (Foxglove).                                              | CAA05512.1             |  | O23923 [T]           |
| Eukaryota | Naringenin-chalcone synthase | 2.3.1.74 | <i>Antirrhinum majus</i> (Garden snapdragon).                                    | CAA27338.1             |  | P06515, P06515.1     |
| Eukaryota | Chalcone synthase            |          | <i>Misopates orontium</i> .                                                      | CAJ44127.1             |  | Q2WBN0 [T]           |
| Eukaryota | Chalcone synthase            |          | <i>Solenostemon scutellarioides</i> ( <i>Coleus</i> ) ( <i>Coleus blumei</i> ).  | ABP57071.1, ABP57072.1 |  | A5A369 [T]           |
| Eukaryota | Naringenin-chalcone synthase | 2.3.1.74 | <i>Perilla frutescens</i> (Beefsteak plant) (Chinese basil).                     | BAA19656.1             |  | O04111 [T], O04111.1 |
| Eukaryota | Chalcone synthase            |          | <i>Perilla frutescens</i> (Beefsteak plant) (Chinese basil).                     | BAA19548.1             |  | O04065 [T]           |
| Eukaryota | Chalcone synthase            |          | <i>Torenia hybrid</i> cultivar.                                                  | BAC87863.1             |  | Q76EK7 [T]           |



|           |                   |  |                          |            |  |            |
|-----------|-------------------|--|--------------------------|------------|--|------------|
| Eukaryota | Chalcone synthase |  | Torenia hybrid cultivar. | BAB20074.1 |  | Q9FS37 [T] |
|-----------|-------------------|--|--------------------------|------------|--|------------|

Subfamily 4B.

| Type      | Sequence                                     | EC Number | Organism                                     | GenBank ID                                                                                           | RefSeq                            | UniProt                   | PDB |
|-----------|----------------------------------------------|-----------|----------------------------------------------|------------------------------------------------------------------------------------------------------|-----------------------------------|---------------------------|-----|
| Eukaryota | hypothetical protein                         |           | Selaginella moellendorffii                   | EFJ11847.1,<br>EFJ13445.1                                                                            | XP_002985571.1,<br>XP_002987004.1 |                           |     |
| Eukaryota | Predicted protein                            |           | Physcomitrella patens subsp. patens.         | EDQ53700.1                                                                                           | XP_001781520.1                    | A9TSD3                    |     |
| Eukaryota | Chalcone synthase-like protein               |           | Triticum aestivum (Wheat).                   | ACB38748.1                                                                                           |                                   | C3RTM5 [T]                |     |
| Eukaryota | Chalcone synthase-like                       |           | Oryza sativa (Rice).                         | CAA62921.1                                                                                           |                                   | Q43595 [T]                |     |
| Eukaryota | Putative uncharacterized protein             |           | Oryza sativa subsp. indica (Rice).           | EAY78973.1                                                                                           |                                   | A2Z8N9                    |     |
| Eukaryota | cDNA clone:001-127-E05, full insert sequence |           | Oryza sativa subsp. japonica (Rice).         | AAL59036.1,<br>AAP54339.1,<br>BAA23618.1,<br>BAC78574.1,<br>BAF26805.1,<br>BAG97274.1,<br>EAZ16469.1 | NP_001064891.1                    | O23811 [T],<br>Q7X795 [T] |     |
| Eukaryota | Putative uncharacterized protein             |           | Zea mays (Maize).                            | ACF79526.1                                                                                           | NP_001131211.1                    | B4FBN3 [T]                |     |
| Eukaryota | Putative uncharacterized protein Sb01g018950 |           | Sorghum bicolor (Sorghum) (Sorghum vulgare). | EER94056.1                                                                                           | XP_002467058.1                    | C5WYB4                    |     |
| Eukaryota | Chalcone synthase G                          |           | Zea mays (Maize).                            | ACG39754.1                                                                                           | NP_001150611.1                    | B6TRM1 [T]                |     |
| Eukaryota | Putative uncharacterized protein             |           | Zea mays (Maize).                            | ACF85939.1                                                                                           |                                   | B4FUZ6 [T]                |     |
| Eukaryota | Putative uncharacterized protein Sb02g009850 |           | Sorghum bicolor (Sorghum) (Sorghum vulgare). | EER98407.1                                                                                           | XP_002461886.1                    | C5X4D3                    |     |
| Eukaryota | Putative uncharacterized protein             |           | Zea mays (Maize).                            | ACN35784.1                                                                                           |                                   | C0PKR8 [T]                |     |

|           |                                  |  |                                                              |                                          |                |            |  |
|-----------|----------------------------------|--|--------------------------------------------------------------|------------------------------------------|----------------|------------|--|
| Eukaryota | Putative uncharacterized protein |  | Zea mays (Maize).                                            | ACF88048.1,<br>ACG35664.1,<br>ACN27825.1 | NP_001149508.1 | B4G105 [T] |  |
| Eukaryota | Putative chalcone synthase       |  | Oryza sativa subsp. japonica (Rice).                         | BAC21541.1,<br>BAF21363.2                | NP_001059449.2 | Q8H305     |  |
| Eukaryota | Putative uncharacterized protein |  | Oryza sativa subsp. indica (Rice).                           | EEC81903.1                               |                | B8B5F1     |  |
| Eukaryota | Putative uncharacterized protein |  | Oryza sativa subsp. japonica (Rice).                         | EAZ39507.1                               |                | A3BIW8     |  |
| Eukaryota | Putative chalcone synthase       |  | Hordeum vulgare var. distichum (Two-rowed barley).           | AAV49989.1                               |                | Q5URW3     |  |
| Eukaryota | CDS_CHS                          |  | Aegilops tauschii (Tausch's goatgrass) (Aegilops squarrosa). | CAJ13966.1                               |                | Q15MP7     |  |
| Eukaryota | CDS_CHS                          |  | Triticum aestivum (Wheat).                                   | CAJ15412.1                               |                | Q15MN7     |  |
| Eukaryota | Chalcone synthase                |  | Triticum aestivum (Wheat).                                   | ACJ22498.1                               |                | B6Z259     |  |
| Eukaryota | CDS_CHS                          |  | Triticum turgidum (Poulard wheat) (Rivet wheat).             | CAJ13548.1                               |                | Q15MR1     |  |
| Eukaryota | Chalcone synthase                |  | Silene latifolia (White campion) (Bladder campion).          | BAE80096.1                               |                | Q2ACE2 [T] |  |
| Eukaryota | Chalcone synthase 6 protein      |  | Brassica rapa (Turnip).                                      | ADF43047.1                               |                | D5LQ20     |  |
| Eukaryota | Chalcone synthase family protein |  | Arabidopsis thaliana (Mouse-ear cress).                      | AAZ23699.1                               |                | Q460W0 [T] |  |
| Eukaryota | Chalcone synthase family protein |  | Arabidopsis thaliana (Mouse-ear cress).                      | AAZ23704.1                               |                | Q460V5 [T] |  |
| Eukaryota | Chalcone synthase family protein |  | Arabidopsis thaliana (Mouse-ear cress).                      | AAZ23717.1                               |                | Q460U2 [T] |  |

|           |                                  |  |                                         |                                                                                                                                                                                                                                                                                                                                                                                                   |             |            |  |
|-----------|----------------------------------|--|-----------------------------------------|---------------------------------------------------------------------------------------------------------------------------------------------------------------------------------------------------------------------------------------------------------------------------------------------------------------------------------------------------------------------------------------------------|-------------|------------|--|
| Eukaryota | Chalcone synthase family protein |  | Arabidopsis thaliana (Mouse-ear cress). | AAZ23702.1,<br>AAZ23708.1                                                                                                                                                                                                                                                                                                                                                                         |             | Q460V1 [T] |  |
| Eukaryota | Chalcone synthase family protein |  | Arabidopsis thaliana (Mouse-ear cress). | AAZ23705.1,<br>AAZ23709.1                                                                                                                                                                                                                                                                                                                                                                         |             | Q460V0 [T] |  |
| Eukaryota | Chalcone synthase-like protein   |  | Arabidopsis thaliana (Mouse-ear cress). | CAB45446.1,<br>CAB80202.1                                                                                                                                                                                                                                                                                                                                                                         |             | Q9SW49 [T] |  |
| Eukaryota | Putative uncharacterized protein |  | Arabidopsis thaliana (Mouse-ear cress). | ABK28665.1                                                                                                                                                                                                                                                                                                                                                                                        |             | A0MFB8 [T] |  |
| Eukaryota | Chalcone synthase family protein |  | Arabidopsis thaliana (Mouse-ear cress). | AAZ23721.1                                                                                                                                                                                                                                                                                                                                                                                        |             | Q460T8 [T] |  |
| Eukaryota | Chalcone synthase-like protein   |  | Arabidopsis thaliana (Mouse-ear cress). | AAM63130.1,<br>AAZ23694.1,<br>AAZ23695.1,<br>AAZ23696.1,<br>AAZ23697.1,<br>AAZ23698.1,<br>AAZ23700.1,<br>AAZ23701.1,<br>AAZ23703.1,<br>AAZ23706.1,<br>AAZ23707.1,<br>AAZ23710.1,<br>AAZ23711.1,<br>AAZ23712.1,<br>AAZ23713.1,<br>AAZ23714.1,<br>AAZ23715.1,<br>AAZ23716.1,<br>AAZ23718.1,<br>AAZ23719.1,<br>AAZ23720.1,<br>AAZ23722.1,<br>AAZ23723.1,<br>AAZ23724.1,<br>AAZ23725.1,<br>ABE66111.1 | NP_567971.1 | Q8LDM2 [T] |  |

|           |                                  |          |                                                                                          |                                                         |                |            |  |
|-----------|----------------------------------|----------|------------------------------------------------------------------------------------------|---------------------------------------------------------|----------------|------------|--|
| Eukaryota | Chalcone synthase family protein |          | Arabidopsis lyrata subsp. lyrata.                                                        | EFH45381.1                                              | XP_002869122.1 | D7MDI2     |  |
| Eukaryota | Chalcone synthase family protein |          | Arabis gemmifera.                                                                        | AAZ23688.1                                              |                | Q460X1 [T] |  |
| Eukaryota | Chalcone synthase family protein |          | Arabis gemmifera.                                                                        | AAZ23693.1                                              |                | Q460W6 [T] |  |
| Eukaryota | Chalcone synthase family protein |          | Arabis gemmifera.                                                                        | AAZ23683.1                                              |                | Q460X6 [T] |  |
| Eukaryota | Chalcone synthase family protein |          | Arabis gemmifera.                                                                        | AAZ23692.1                                              |                | Q460W7 [T] |  |
| Eukaryota | Chalcone synthase family protein |          | Arabis gemmifera.                                                                        | AAZ23682.1                                              |                | Q460X7 [T] |  |
| Eukaryota | Chalcone synthase family protein |          | Arabis gemmifera.                                                                        | AAZ23685.1                                              |                | Q460X4 [T] |  |
| Eukaryota | Chalcone synthase family protein |          | Arabis gemmifera.                                                                        | AAZ23684.1,<br>AAZ23689.1,<br>AAZ23690.1,<br>AAZ23691.1 |                | Q460X0 [T] |  |
| Eukaryota | Chalcone synthase family protein |          | Arabis gemmifera.                                                                        | AAZ23686.1,<br>AAZ23687.1                               |                | Q460X2 [T] |  |
| Eukaryota | PREDICTED: hypothetical protein  |          | Vitis vinifera                                                                           |                                                         | XP_002276653.1 |            |  |
| Eukaryota | Chalcone synthase, putative      | 2.3.1.74 | Ricinus communis (Castor bean).                                                          | EEF33135.1                                              | XP_002529257.1 | B9STD8     |  |
| Eukaryota | Chs-like protein                 |          | Populus trichocarpa (Western balsam poplar)<br>(Populus balsamifera subsp. trichocarpa). | EEE85993.1                                              | XP_002305482.1 | B9H143     |  |
| Eukaryota | Chalcone synthase homolog PrChS1 |          | Pinus radiata (Monterey pine).                                                           | AAB80804.1                                              |                | O24484 [T] |  |

|           |                                            |  |                                         |                                                         |                |            |  |
|-----------|--------------------------------------------|--|-----------------------------------------|---------------------------------------------------------|----------------|------------|--|
| Eukaryota | Chalcone synthase 2 protein                |  | Brassica rapa (Turnip).                 | ADF43043.1                                              |                | D5LQ16     |  |
| Eukaryota | Putative uncharacterized protein           |  | Arabidopsis lyrata subsp. lyrata.       | EFH51308.1                                              | XP_002875049.1 | D7M6B5     |  |
| Eukaryota | Putative uncharacterized protein At4g00040 |  | Arabidopsis thaliana (Mouse-ear cress). | AAC19299.1,<br>AAN72004.1,<br>AAP37822.1,<br>CAB80762.1 | NP_191915.1    | O81305 [T] |  |
| Eukaryota | Putative chalcone synthase                 |  | Arabidopsis thaliana (Mouse-ear cress). | AAM63363.1                                              |                | Q8LD79 [T] |  |
| Eukaryota | Polyketide synthase                        |  | Hypericum perforatum (St. John's wort). | ABP98922.1                                              |                | A8QW46 [T] |  |
| Eukaryota | Chalcone synthase 3 protein                |  | Brassica rapa (Turnip).                 | ADF43044.1                                              |                | D5LQ17     |  |
| Eukaryota | Chalcone synthase family protein           |  | Arabidopsis thaliana (Mouse-ear cress). | AA96746.1                                               |                | Q4JNU1     |  |
| Eukaryota | Chalcone synthase family protein           |  | Arabis gemmifera.                       | AAZ81862.1,<br>AAZ81865.1,<br>AAZ81866.1                |                | Q3YMX9     |  |
| Eukaryota | Chalcone synthase family protein           |  | Arabidopsis thaliana (Mouse-ear cress). | AA96748.1                                               |                | Q4JNT9     |  |
| Eukaryota | Chalcone synthase family protein           |  | Arabidopsis thaliana (Mouse-ear cress). | AA96728.1                                               |                | Q4JNV9     |  |
| Eukaryota | Chalcone synthase family protein           |  | Arabidopsis thaliana (Mouse-ear cress). | AA96719.1                                               |                | Q4JNW8     |  |
| Eukaryota | Chalcone synthase family protein           |  | Arabidopsis thaliana (Mouse-ear cress). | AA96745.1                                               |                | Q4JNU2     |  |
| Eukaryota | Chalcone synthase family protein           |  | Arabidopsis thaliana (Mouse-ear cress). | AA96729.1,<br>AA96742.1,<br>AA96743.1                   |                | Q4JNU5     |  |

|           |                                  |  |                                         |                                                                                                                                                       |                |            |  |
|-----------|----------------------------------|--|-----------------------------------------|-------------------------------------------------------------------------------------------------------------------------------------------------------|----------------|------------|--|
| Eukaryota | Chalcone synthase family protein |  | Arabidopsis thaliana (Mouse-ear cress). | AA96725.1                                                                                                                                             |                | Q4JNW2     |  |
| Eukaryota | T7I23.4 protein                  |  | Arabidopsis thaliana (Mouse-ear cress). | AAC24368.1,<br>ABO09877.1                                                                                                                             | NP_171707.1    | O23674 [T] |  |
| Eukaryota | Chalcone synthase family protein |  | Arabidopsis thaliana (Mouse-ear cress). | AA96717.1,<br>AA96718.1,<br>AA96726.1,<br>AA96730.1,<br>AA96731.1,<br>AA96732.1,<br>AA96735.1,<br>AA96736.1,<br>AA96739.1,<br>AA96744.1,<br>AA96747.1 |                | Q4JNW9     |  |
| Eukaryota | Chalcone synthase family protein |  | Arabidopsis thaliana (Mouse-ear cress). | AA96723.1                                                                                                                                             |                | Q4JNW4     |  |
| Eukaryota | Chalcone synthase family protein |  | Arabidopsis thaliana (Mouse-ear cress). | AA96721.1                                                                                                                                             |                | Q4JNW6     |  |
| Eukaryota | Chalcone synthase family protein |  | Arabidopsis thaliana (Mouse-ear cress). | AA96741.1                                                                                                                                             |                | Q4JNU6     |  |
| Eukaryota | Chalcone synthase family protein |  | Arabidopsis thaliana (Mouse-ear cress). | AA96720.1,<br>AA96722.1,<br>AA96724.1,<br>AA96727.1,<br>AA96733.1,<br>AA96734.1,<br>AA96737.1,<br>AA96738.1,<br>AA96740.1                             |                | Q4JNW5     |  |
| Eukaryota | Chalcone synthase family protein |  | Arabis gemmifera.                       | AAZ81861.1                                                                                                                                            |                | Q3YMY3     |  |
| Eukaryota | Chalcone synthase family protein |  | Arabidopsis lyrata subsp. lyrata.       | EFH65598.1                                                                                                                                            | XP_002889339.1 | D7KP48     |  |

|           |                                                                        |  |                                      |                           |                |            |  |
|-----------|------------------------------------------------------------------------|--|--------------------------------------|---------------------------|----------------|------------|--|
| Eukaryota | Chalcone synthase family protein                                       |  | Arabis gemmifera.                    | AAZ81859.1,<br>AAZ81864.1 |                | Q3YMY0     |  |
| Eukaryota | Chalcone synthase family protein                                       |  | Arabis gemmifera.                    | AAZ81863.1                |                | Q3YMY1     |  |
| Eukaryota | Chalcone synthase family protein                                       |  | Arabis gemmifera.                    | AAZ81860.1                |                | Q3YMY4     |  |
| Eukaryota | Chalcone synthase family protein                                       |  | Arabis gemmifera.                    | AAZ81868.1                |                | Q3YMX6     |  |
| Eukaryota | Chalcone synthase family protein                                       |  | Arabis gemmifera.                    | AAZ81871.1                |                | Q3YMX3     |  |
| Eukaryota | Chalcone synthase family protein                                       |  | Arabis gemmifera.                    | AAZ81869.1                |                | Q3YMX5     |  |
| Eukaryota | Chalcone synthase family protein                                       |  | Arabis gemmifera.                    | AAZ81870.1                |                | Q3YMX4     |  |
| Eukaryota | Chalcone synthase family protein                                       |  | Arabis gemmifera.                    | AAZ81872.1                |                | Q3YMX2     |  |
| Eukaryota | Chalcone synthase family protein                                       |  | Arabis gemmifera.                    | AAZ81873.1                |                | Q3YMX1     |  |
| Eukaryota | Chalcone synthase family protein                                       |  | Arabis gemmifera.                    | AAZ81867.1                |                | Q3YMX7     |  |
| Eukaryota | Putative chalcone synthase                                             |  | Artemisia annua (Sweet wormwood).    | ACY74337.1                |                | D2WS89 [T] |  |
| Eukaryota | Anther-specific protein                                                |  | Nicotiana sylvestris (Wood tobacco). | CAA74846.1,<br>CAA74847.1 |                | O24625 [T] |  |
| Eukaryota | PREDICTED: hypothetical protein                                        |  | Vitis vinifera                       |                           | XP_002276642.1 |            |  |
| Eukaryota | Whole genome shotgun sequence of line PN40024, scaffold_21.assembly12x |  | Vitis vinifera (Grape).              | CBI16627.3                |                | D7SLU9     |  |



|           |                                                       |          |                                                                                       |            |                |        |  |
|-----------|-------------------------------------------------------|----------|---------------------------------------------------------------------------------------|------------|----------------|--------|--|
| Eukaryota | Putative uncharacterized protein                      |          | Vitis vinifera (Grape).                                                               | CAN83038.1 |                | A5BAL9 |  |
| Eukaryota | Pentatricopeptide repeat-containing protein, putative | 2.3.1.74 | Ricinus communis (Castor bean).                                                       | EEF50296.1 | XP_002511627.1 | B9RD38 |  |
| Eukaryota | Chs-like protein                                      |          | Populus trichocarpa (Western balsam poplar) (Populus balsamifera subsp. trichocarpa). | EEE73580.1 | XP_002326830.1 | B9MV12 |  |
| Eukaryota | Chs-like protein                                      |          | Populus trichocarpa (Western balsam poplar) (Populus balsamifera subsp. trichocarpa). | EEE81784.1 | XP_002302511.1 | B9GPA0 |  |

Subfamily 4C.

| Type     | Sequence                                                           | EC Number | Organism                                                                                  | GenBank ID             | RefSeq                        | UniProt        | PDB |
|----------|--------------------------------------------------------------------|-----------|-------------------------------------------------------------------------------------------|------------------------|-------------------------------|----------------|-----|
| Bacteria | Chalcone and stilbene synthase domain protein                      |           | Frankia sp. Eu1c.                                                                         | EFA61271.1             | ZP_06237498.1                 | D1VFS6         |     |
| Bacteria | Chalcone and stilbene synthase domain protein                      |           | Frankia sp. (strain EAN1pec).                                                             | ABW13776.1             | YP_001508682.1                | A8LAK1         |     |
| Bacteria | Chalcone and stilbene synthase domain protein                      |           | Stackebrandtia nassauensis (strain DSM 44728 / NRRL B-16338 / NBRC 102104 / LLR-40K-21).  | ADD39865.1             | YP_003508958.1                | D3Q1L7         |     |
| Bacteria | Chalcone and stilbene synthase domain protein                      |           | Salinispora tropica (strain ATCC BAA-916 / DSM 44818 / CNB-440).                          | ABP56692.1             | YP_001161070.1                | A4XCNS         |     |
| Bacteria | 3-Oxoacyl-(Acyl-carrier-protein (ACP)) synthase III domain protein |           | Salinispora arenicola (strain CNS-205).                                                   | ABW00448.1             | YP_001539438.1                | A8M7T1         |     |
| Bacteria | Chalcone and stilbene synthase domain protein                      |           | Geodermatophilus obscurus (strain ATCC 25078 / DSM 43160 / JCM 3152 / G-20).              | ADB77357.1             | YP_003411728.1                | D2S5V1         |     |
| Bacteria | Predicted naringenin-chalcone synthase                             |           | Saccharomonospora viridis (strain ATCC 15386 / DSM 43017 / JCM 3036 / NBRC 12207 / P101). | ACU97058.1             | YP_003133885.1                | C7MNV8         |     |
| Bacteria | Possible chalcone synthase                                         |           | Algoriphagus sp. PR1.                                                                     | EAZ81592.1             | ZP_01718257.1                 | A3HTX0         |     |
| Bacteria | Naringenin-chalcone synthase                                       | 2.3.1.74  | Cytophaga hutchinsonii (strain ATCC 33406 / NCIMB 9469).                                  | ABG61026.1             | YP_680369.1                   | Q11NI7         |     |
| Bacteria | Naringenin-chalcone synthase                                       | 2.3.1.74  | Dyadobacter fermentans (strain ATCC 700827 / DSM 18053 / NS114).                          | ACT93260.1             | YP_003086425.1                | C6VXB7         |     |
| Bacteria | Putative Naringenin-chalcone synthase                              | 2.3.1.74  | Legionella longbeachae serogroup 1 (strain NSW150).                                       | CBJ11980.1, EEZ94883.1 | YP_003455079.1, ZP_06185261.1 | D1RDZ1, D3HSU0 |     |
| Bacteria | Possible chalcone synthase                                         | 2.3.1.74  | Psychrobacter arcticus (strain DSM 17307 / 273-4).                                        | AAZ18284.1             | YP_263718.1                   | Q4FUM4         |     |
| Bacteria | Naringenin-chalcone synthase                                       | 2.3.1.74  | Psychromonas ingrahamii (strain 37).                                                      | ABM02123.1             | YP_941722.1                   | A1SRK8         |     |
| Bacteria | Chalcone and stilbene synthase domain protein                      | 2.3.1.74  | Planctomyces limnophilus (strain ATCC 43296 / DSM 3776 / IFAM 1008 / 290).                | ADG66315.1             | YP_003628514.1                | D5SQ63         |     |

|          |                                               |           |                                                                                 |                           |                |                   |  |
|----------|-----------------------------------------------|-----------|---------------------------------------------------------------------------------|---------------------------|----------------|-------------------|--|
| Bacteria | Chalcone synthase (CHS)                       |           | Planctomyces maris DSM 8797.                                                    | EDL61209.1                | ZP_01852955.1  | A6C2B7            |  |
| Bacteria | Phloroisovalerophenone synthase               | 2.3.1.156 | Cyanobium sp. PCC 7001.                                                         | EDY38841.1                | ZP_05045532.1  | B5IIM9            |  |
| Bacteria | Chalcone synthase (CHS)                       |           | Synechococcus sp. WH 5701.                                                      | EAQ76409.1                | ZP_01083428.1  | A3YTP8            |  |
| Bacteria | Chalcone synthase                             | 2.3.1.74  | Synechococcus sp. (strain CC9311).                                              | ABI47585.1                | YP_730665.1    | Q0IA57            |  |
| Bacteria | Naringenin-chalcone synthase                  | 2.3.1.74  | Synechococcus sp. (strain CC9902).                                              | ABB26303.1                | YP_377347.1    | Q3AVG8            |  |
| Bacteria | Chalcone synthase (CHS)                       |           | Synechococcus sp. RS9917.                                                       | EAQ68835.1                | ZP_01080545.1  | A3Z835            |  |
| Bacteria | Chalcone synthase (CHS)                       |           | Synechococcus sp. (strain WH7805).                                              | EAR18478.1                | ZP_01123843.1  | A4CTW3            |  |
| Bacteria | Probable chalcone synthase                    |           | Rhodobacterales bacterium HTCC2654.                                             | EAQ14941.1                | ZP_01011634.1  | A3VAK0            |  |
| Bacteria | Putative naringenin-chalcone synthase         | 2.3.1.74  | Sphingobium japonicum (strain NBRC 101211 / UT26S).                             | BAI98621.1                | YP_003559353.1 | D4Z802            |  |
| Bacteria | Chalcone and stilbene synthase domain protein |           | Sphingomonas wittichii (strain RW1 / DSM 6014 / JCM 10273).                     | ABQ67552.1                | YP_001261690.1 | A5V5I6            |  |
| Bacteria | Naringenin-chalcone synthase                  | 2.3.1.74  | Rhodomicrobium vannielii ATCC 17100.                                            | EFC12353.1                | ZP_06348506.1  | D2LBN1            |  |
| Bacteria | Chalcone and stilbene synthase domain protein |           | Acidobacterium sp. MP5ACTX8.                                                    | EFI58361.1                | ZP_07029267.1  | D6UMU2            |  |
| Bacteria | Chalcone and stilbene synthase domain protein |           | Acidobacterium sp. MP5ACTX8.                                                    | EFI54664.1                | ZP_07032746.1  | D6UXM0            |  |
| Bacteria | Naringenin-chalcone synthase                  | 2.3.1.74  | Sorangium cellulosum (strain So ce56) (Polyangium cellulosum (strain So ce56)). | AAZ93633.1,<br>CAN92341.1 | YP_001612821.1 | A1X3E7,<br>A9FW42 |  |

|          |                                                           |          |                                                                                  |            |                |                   |  |
|----------|-----------------------------------------------------------|----------|----------------------------------------------------------------------------------|------------|----------------|-------------------|--|
| Bacteria | Naringenin-chalcone synthase                              | 2.3.1.74 | Methylocella silvestris (strain BL2 / DSM 15510 / NCIMB 13906).                  | ACK52293.1 | YP_002363655.1 | B8ES78            |  |
| Bacteria | Chalcone and stilbene synthase domain protein             |          | Mesorhizobium opportunistum WSM2075.                                             | EEW30092.1 | ZP_05813620.1  | C8SW52            |  |
| Bacteria | Chalcone and stilbene synthase domain protein             |          | Spirosoma linguale (strain ATCC 33905 / DSM 74 / LMG 10896).                     | ADB38550.1 | YP_003387349.1 | D2QGP2            |  |
| Bacteria | Naringenin-chalcone synthase                              | 2.3.1.74 | Salinibacter ruber (strain M8).                                                  | CBH24512.1 | YP_003571464.1 | D5H907            |  |
| Bacteria | Chalcone synthase, putative                               | 2.3.1.-  | Salinibacter ruber (strain DSM 13855 / M31).                                     | ABC45053.1 | YP_445519.1    | Q2S2R2            |  |
| Bacteria | Putative chalcone synthase (Naringenin-chalcone synthase) |          | Arthrobacter aurescens (strain TC1).                                             | ABM08426.1 | YP_947940.1    | A1R6S8            |  |
| Bacteria | Naringenin-chalcone synthase                              | 2.3.1.74 | Arthrobacter chlorophenolicus (strain A6 / ATCC 700700 / DSM 12829 / JCM 12360). | ACL39914.1 | YP_002488003.1 | B8H8N6            |  |
| Bacteria | Extracellular solute-binding protein                      | 2.3.1.74 | Arthrobacter sp. (strain FB24).                                                  | ABK03578.1 | YP_831678.1    | A0JX08,<br>A0K079 |  |
| Bacteria | Predicted naringenin-chalcone synthase                    |          | Sanguibacter keddieii (strain ATCC 51767 / DSM 10542 / NCFB 3025 / ST-74).       | ACZ21815.1 | YP_003314649.1 | D1BH95            |  |
| Bacteria | Putative chalcone synthase/polyketide synthase III        | 2.3.1.74 | Clavibacter michiganensis subsp. michiganensis (strain NCPPB 382).               | CAN01581.1 | YP_001222276.1 | A5CR76            |  |
| Bacteria | Putative chalcone synthase                                | 2.3.1.74 | Clavibacter michiganensis subsp. sepedonicus (strain ATCC 33113 / JCM 9667).     | CAQ01876.1 | YP_001710480.1 | BORDCO            |  |

Subfamily 4D.

| Type      | Sequence                                                                                   | EC Number | Organism                                                                                                                          | GenBank ID                | RefSeq                          | UniProt           | PDB |
|-----------|--------------------------------------------------------------------------------------------|-----------|-----------------------------------------------------------------------------------------------------------------------------------|---------------------------|---------------------------------|-------------------|-----|
| Eukaryota | Putative polyketide synthase                                                               |           | Polysphondylium pallidum PN500.                                                                                                   | EFA86495.1                |                                 | D3AW22            |     |
| Eukaryota | Polyketide Synthase III                                                                    | 2.3.1.-   | Ectocarpus siliculosus Ec 32                                                                                                      | CBN76919.1                |                                 |                   |     |
| Eukaryota | Polyketide Synthase III (C-terminal region)<br>Polyketide Synthase III (N-terminal region) | 2.3.1.-   | Ectocarpus siliculosus (Brown alga).                                                                                              | CBJ28635.1                |                                 | D7FHT0            |     |
| Bacteria  | Chalcone and stilbene synthase domain protein                                              |           | Tsakamurella paurometabola (strain ATCC 8368 / DSM 20162 / JCM 10117 / NBRC 16120 / NCTC 13040) (Corynebacterium paurometabolum). | ADG78933.1                | YP_003647272.1                  | D5UQG3            |     |
| Bacteria  | Putative type III polyketide synthase                                                      |           | Nocardia farcinica.                                                                                                               | BAD59781.1                | YP_121145.1                     | Q5YPW0            |     |
| Bacteria  | Putative uncharacterized protein                                                           |           | Mycobacterium bovis (strain BCG / Tokyo 172 / ATCC 35737 / TMC 1019).                                                             | BAH25695.1,<br>CAL71420.1 | YP_002644463.1,<br>YP_977525.1  | A1KIG1,<br>C1AN16 |     |
| Bacteria  | conserved hypothetical protein                                                             |           | Mycobacterium tuberculosis EAS054                                                                                                 | EFD61468.1                | ZP_03428177.1,<br>ZP_06512830.1 |                   |     |
| Bacteria  | conserved hypothetical protein                                                             |           | Mycobacterium tuberculosis K85                                                                                                    | EFD43047.1                | ZP_05772124.1,<br>ZP_06454265.1 |                   |     |

|          |                                  |  |                                        |                                                                                                                                                                                                |                                                                                                                                                                                                                                                                                                                                                                                                                                                                                                                                         |                                                                                 |            |
|----------|----------------------------------|--|----------------------------------------|------------------------------------------------------------------------------------------------------------------------------------------------------------------------------------------------|-----------------------------------------------------------------------------------------------------------------------------------------------------------------------------------------------------------------------------------------------------------------------------------------------------------------------------------------------------------------------------------------------------------------------------------------------------------------------------------------------------------------------------------------|---------------------------------------------------------------------------------|------------|
| Bacteria | Putative uncharacterized protein |  | Mycobacterium tuberculosis.            | AAK45681.1,<br>ABQ73124.1,<br>ABR05744.1,<br>ACT25685.1,<br>CAE55381.1,<br>EAY59691.1,<br>EBA41821.1,<br>EFD12974.1,<br>EFD21963.1,<br>EFD46789.1,<br>EFD53138.1,<br>EFD57942.1,<br>EFD77053.1 | YP_001282686.1,<br>YP_001287346.1,<br>YP_003032580.1,<br>YP_177803.1,<br>ZP_02550701.1,<br>ZP_03415401.1,<br>ZP_03424617.1,<br>ZP_03432308.1,<br>ZP_03536352.1,<br>ZP_04924949.1,<br>ZP_04980308.1,<br>ZP_05140833.1,<br>ZP_05220181.1,<br>ZP_05767919.1,<br>ZP_06432559.1,<br>ZP_06444048.1,<br>ZP_06449614.1,<br>ZP_06504500.1,<br>ZP_06509304.1,<br>ZP_06516855.1,<br>ZP_06800624.1,<br>ZP_06951706.1,<br>ZP_06960033.1,<br>ZP_07409824.1,<br>ZP_07413891.1,<br>ZP_07419039.1,<br>ZP_07422424.1,<br>ZP_07426791.1,<br>ZP_07435497.1, | A2VHR0,<br>A4KGT6,<br>A5U274,<br>A5WM55,<br>C6DTL2,<br>D6F3Y3,<br>Q7D8I1<br>[P] | 1TED, 1TEE |
| Bacteria | chalcone/stilbene synthase       |  | Mycobacterium tuberculosis CPHL_A      | EFD17126.1                                                                                                                                                                                     | ZP_05763785.1,<br>ZP_06436711.1                                                                                                                                                                                                                                                                                                                                                                                                                                                                                                         |                                                                                 |            |
| Bacteria | hypothetical protein Mtub9_06723 |  | Mycobacterium tuberculosis 94_M4241A   |                                                                                                                                                                                                | ZP_03419826.1                                                                                                                                                                                                                                                                                                                                                                                                                                                                                                                           |                                                                                 |            |
| Bacteria | Putative uncharacterized protein |  | Mycobacterium tuberculosis 94_M4241A.  | EFI29965.1                                                                                                                                                                                     | ZP_07012286.1                                                                                                                                                                                                                                                                                                                                                                                                                                                                                                                           | D7EQG3                                                                          |            |
| Bacteria | chalcone/stilbene synthase       |  | Mycobacterium kansasii ATCC 12478      |                                                                                                                                                                                                | ZP_04749411.1                                                                                                                                                                                                                                                                                                                                                                                                                                                                                                                           |                                                                                 |            |
| Bacteria | Chalcone/stilbene synthase       |  | Mycobacterium ulcerans (strain Agy99). | ABL04253.1                                                                                                                                                                                     | YP_905724.1                                                                                                                                                                                                                                                                                                                                                                                                                                                                                                                             | AOPPI4                                                                          |            |

|          |                            |  |                                                  |            |                |        |
|----------|----------------------------|--|--------------------------------------------------|------------|----------------|--------|
| Bacteria | Chalcone/stilbene synthase |  | Mycobacterium marinum (strain ATCC BAA-535 / M). | ACC40639.1 | YP_001850494.1 | B2HNE1 |
|----------|----------------------------|--|--------------------------------------------------|------------|----------------|--------|

Subfamily 4E.

| Type      | Sequence                              | EC Number | Organism                                                                                                               | GenBank ID | RefSeq         | UniProt    | PDB                             |
|-----------|---------------------------------------|-----------|------------------------------------------------------------------------------------------------------------------------|------------|----------------|------------|---------------------------------|
| Eukaryota | Putative uncharacterized protein      |           | <i>Aspergillus flavus</i> (strain ATCC 200026 / FGSC A1120 / NRRL 3357 / JCM 12722 / SRRCL 167).                       | EED58086.1 | XP_002373698.1 | B8MW95     |                                 |
| Eukaryota | hypothetical protein CIMG_01741       |           | <i>Coccidioides immitis</i> RS                                                                                         |            | XP_001247970.1 |            |                                 |
| Eukaryota | Chalcone synthase, putative           |           | <i>Coccidioides posadasii</i> (strain C735) (Valley fever fungus).                                                     | EER23379.1 | XP_003065524.1 | C5PFS6     |                                 |
| Eukaryota | Putative uncharacterized protein      |           | <i>Botryotinia fuckeliana</i> (strain B05.10) (Noble rot fungus) ( <i>Botrytis cinerea</i> ).                          | EDN25875.1 | XP_001555327.1 | A6S0F8     |                                 |
| Eukaryota | Putative uncharacterized protein      |           | <i>Sclerotinia sclerotiorum</i> (strain ATCC 18683 / 1980 / Ss 1) (White mold) ( <i>Whetzelinia sclerotiorum</i> ).    | EDN99484.1 | XP_001596122.1 | A7EAK6     |                                 |
| Eukaryota | Predicted CDS Pa_4_9290               |           | <i>Podospora anserina</i> .                                                                                            | CAP66562.1 | XP_001905896.1 | B2AQY4     |                                 |
| Eukaryota | hypothetical protein FG08378.1        |           | <i>Gibberella zeae</i> PH-1                                                                                            |            | XP_388554.1    |            |                                 |
| Eukaryota | hypothetical protein MGG_04643        |           | <i>Magnaporthe oryzae</i> 70-15                                                                                        |            | XP_362198.2    |            |                                 |
| Eukaryota | Putative type III polyketide synthase |           | <i>Sordaria macrospora</i> .                                                                                           | CBI50968.1 |                | D1Z3X7     |                                 |
| Eukaryota | Putative uncharacterized protein      |           | <i>Neurospora crassa</i> .                                                                                             | EAA31191.1 | XP_960427.1    | Q7S6N4 [P] | 3E1H,<br>3EUO,<br>3EUQ,<br>3EUT |
| Eukaryota | Chalcone synthase 4                   |           | <i>Pyrenophora tritici-repentis</i> (strain Pt-1C-BFP) (Wheat tan spot fungus) ( <i>Drechslera tritici-repentis</i> ). | EDU47508.1 | XP_001934934.1 | B2W4Q1     |                                 |
| Eukaryota | Putative uncharacterized protein      |           | <i>Phaeosphaeria nodorum</i> (Glume blotch fungus) ( <i>Septoria nodorum</i> ).                                        | EAT81488.2 | XP_001801244.1 | Q0UB75     |                                 |



|           |                                  |  |                                                                             |            |                |        |  |
|-----------|----------------------------------|--|-----------------------------------------------------------------------------|------------|----------------|--------|--|
| Eukaryota | Putative uncharacterized protein |  | Arthroderma benhamiae (strain CBS 112371)<br>(Trichophyton mentagrophytes). | EFE33957.1 | XP_003014860.1 | D4AT57 |  |
| Eukaryota | Putative uncharacterized protein |  | Trichophyton verrucosum (strain HKI 0517).                                  | EFE42584.1 | XP_003023202.1 | D4D6E0 |  |
| Eukaryota | Predicted CDS Pa_6_7330          |  | Podospora anserina.                                                         | CAP71782.1 | XP_001910646.1 | B2B3U6 |  |
| Eukaryota | hypothetical protein MGG_06254   |  | Magnaporthe oryzae 70-15                                                    |            | XP_369739.2    |        |  |

Subfamily 4F.

| Type     | Sequence                                                           | EC Number | Organism                                                                            | GenBank ID | RefSeq         | UniProt           | PDB |
|----------|--------------------------------------------------------------------|-----------|-------------------------------------------------------------------------------------|------------|----------------|-------------------|-----|
| Bacteria | Putative DpgA                                                      |           | Legionella drancourtii LLAP12.                                                      | EET11468.1 | ZP_05110839.1  | C6N494            |     |
| Bacteria | 3-Oxoacyl-(Acyl-carrier-protein (ACP)) synthase III domain protein |           | Kribbella flavida (strain DSM 17836 / JCM 10339 / NBRC 14399).                      | ADB33179.1 | YP_003381978.1 | D2PSP1            |     |
| Bacteria | DpgA                                                               |           | Streptomyces toyocaensis.                                                           | AAM80548.1 |                | Q8KLK5            |     |
| Bacteria | GCN5-related N-acetyltransferase                                   |           | Frankia sp. (strain Ccl3).                                                          | ABD11825.1 | YP_481554.1    | Q2JA67,<br>Q2JDY2 |     |
| Bacteria | Type III polyketide synthase                                       |           | Streptomyces violaceoruber.                                                         | CAQ52620.1 |                | COZ471            |     |
| Bacteria | Chalcone and stilbene synthase domain protein                      |           | Nocardiopsis dassonvillei subsp. dassonvillei DSM 43111.                            | ADH67168.1 | YP_003679674.1 | D7B4X8            |     |
| Bacteria | Chalcone and stilbene synthase domain protein                      |           | bacterium Ellin514.                                                                 | EEF58006.1 | ZP_03631697.1  | B9XQ88            |     |
| Bacteria | 3-Oxoacyl-(Acyl-carrier-protein (ACP)) synthase III domain protein |           | Geobacter sp. M18.                                                                  | EET33876.1 | ZP_05313430.1  | C6MWB6            |     |
| Bacteria | 3-Oxoacyl-(Acyl-carrier-protein (ACP)) synthase III domain protein |           | Desulfomicrobium baculatum (strain DSM 4028 / VKM B-1378) Desulfovibrio baculatus). | ACU90197.1 | YP_003158613.1 | C7LNX3            |     |
| Bacteria | Putative Chalcone and stilbene synthase domain protein             |           | NC10 bacterium 'Dutch sediment'.                                                    | CBE67772.1 |                | D5MLA6            |     |

Subfamily 4G.

| Type     | Sequence                                                         | EC Number | Organism                                                                                       | GenBank ID                               | RefSeq         | UniProt           | PDB |
|----------|------------------------------------------------------------------|-----------|------------------------------------------------------------------------------------------------|------------------------------------------|----------------|-------------------|-----|
| Bacteria | Putative uncharacterized protein                                 |           | <i>Yersinia mollaretii</i> ATCC 43969.                                                         | EEQ11777.1                               | ZP_04639788.1  | C4S9M0            |     |
| Bacteria | PhID                                                             |           | <i>Vibrio coralliilyticus</i> ATCC BAA-450.                                                    | EEX31091.1                               | ZP_05887524.1  | C9NX65            |     |
| Bacteria | Putative uncharacterized protein                                 |           | <i>Vibrio cholerae</i> RC385.                                                                  | EFH75677.1                               | ZP_06941178.1  | A6Y3F2            |     |
| Bacteria | PhID                                                             |           | <i>Vibrio</i> sp. RC586.                                                                       | EEY98257.1                               | ZP_06080642.1  | D0IK93            |     |
| Bacteria | Naringenin-chalcone synthase                                     | 2.3.1.74  | <i>Ralstonia solanacearum</i> CMR15                                                            | CBJ41001.1                               |                |                   |     |
| Bacteria | Naringenin-chalcone synthase                                     | 2.3.1.74  | <i>Sorangium cellulosum</i> (strain So ce56) ( <i>Polyangium cellulosum</i> (strain So ce56)). | AAZ93632.1,<br>CAN92292.1                | YP_001612772.1 | A1X3E6,<br>A9FVM5 |     |
| Bacteria | Putative 1,3,6,8-tetrahydroxynaphthalene synthase (Type III PKS) |           | <i>Streptomyces cinnamonensis</i> .                                                            | CAL34084.1                               |                | A2AXE5            |     |
| Bacteria | Probable Type III PKS                                            |           | <i>Streptomyces</i> sp. KO-3988.                                                               | BAE78969.1                               |                | Q2L6E9            |     |
| Bacteria | Type III polyketide synthase RppA                                |           | <i>Streptomyces antibioticus</i> .                                                             | BAB91443.1,<br>BAD89289.1                |                | Q8L3D2            |     |
| Bacteria | Type-III PKS                                                     |           | <i>Streptomyces griseus</i> subsp. <i>griseus</i> (strain JCM 4626 / NBRC 13350).              | BAA33495.1,<br>BAE07216.1,<br>BAG23449.1 | YP_001828132.1 | B1VLQ8,<br>Q54240 |     |
| Bacteria | Chalcone and stilbene synthase domain protein                    |           | <i>Streptomyces</i> sp. ACT-1.                                                                 | EFB84224.1                               | ZP_06276870.1  | D1WT22            |     |
| Bacteria | Chalcone and stilbene synthase domain protein                    |           | <i>Frankia</i> sp. EUN1f.                                                                      | EFC81126.1                               | ZP_06416051.1  | D3D7H7            |     |
| Bacteria | Chalcone and stilbene synthase domain protein                    |           | <i>Frankia</i> symbiont of <i>Datisca glomerata</i> .                                          | EFD29408.1                               | ZP_06473869.1  | D3M0D5            |     |

|          |                                                 |          |                                                        |                           |                                 |                   |        |
|----------|-------------------------------------------------|----------|--------------------------------------------------------|---------------------------|---------------------------------|-------------------|--------|
| Bacteria | Type III PKS, putative chalcone synthase        | 2.3.1.74 | Streptomyces clavuligerus ATCC 27064                   | EFG10559.1                | ZP_06774960.1                   |                   |        |
| Bacteria | putative type III polyketide synthase           |          | Saccharopolyspora erythraea NRRL 2338                  |                           | ZP_06563505.1                   |                   |        |
| Bacteria | Putative type III polyketide synthase           | 2.3.1.74 | Saccharopolyspora erythraea (strain NRRL 23338).       | CAM00568.1                | YP_001103493.1                  | A4F943            |        |
| Bacteria | RppA                                            |          | Saccharopolyspora erythraea (Streptomyces erythraeus). | AAL78053.1                |                                 |                   | Q8KQM3 |
| Bacteria | Type III polyketide synthase                    |          | Streptomyces avermitilis.                              | BAB69299.1,<br>BAC74842.1 | NP_828307.1                     |                   | Q93H91 |
| Bacteria | Type III polyketide synthase RppB               |          | Streptomyces antibioticus.                             | BAB91444.1                |                                 |                   | Q8L3D1 |
| Bacteria | 2,4-diacetylphloroglucinol biosynthesis protein |          | Streptomyces sp. e14                                   | EFF89799.1                | ZP_06706677.1                   |                   |        |
| Bacteria | type III polyketide synthase RppA               |          | Streptomyces lividans TK24                             | EFD70720.1                | ZP_05527630.1,<br>ZP_06532470.1 |                   |        |
| Bacteria | Putative polyketide synthase                    |          | Streptomyces coelicolor.                               | CAC01488.1                | NP_625495.1                     | Q9FCA7<br>[P]     | 1U0M   |
| Bacteria | Type III polyketide synthase RppA               |          | Streptomyces lividans.                                 | BAB91445.1                |                                 |                   | Q8L3D0 |
| Bacteria | Putative polyketide synthase                    |          | Streptomyces coelicolor.                               | CAC01488.1                | NP_625495.1                     | Q9FCA7<br>[P]     | 1U0M   |
| Bacteria | PhID                                            |          | Pseudomonas aeruginosa (strain LESB58).                | ACD39163.1,<br>CAW27303.1 | YP_002440177.1                  | B3G2A1,<br>B7V327 |        |
| Bacteria | Putative polyketide synthase                    |          | Pseudomonas fluorescens.                               | ACZ67849.1                |                                 |                   | D2K6G4 |

|          |      |  |                                                       |                           |             |        |  |
|----------|------|--|-------------------------------------------------------|---------------------------|-------------|--------|--|
| Bacteria | PhID |  | Pseudomonas fluorescens (strain Pf-5 / ATCC BAA-477). | AAY95147.1                | YP_263015.1 | Q4K418 |  |
| Bacteria | PhID |  | Pseudomonas fluorescens.                              | BAD00181.1                |             | Q75V74 |  |
| Bacteria | PhID |  | Pseudomonas fluorescens.                              | AAM27403.1                |             | Q8L2P0 |  |
| Bacteria | PhID |  | Pseudomonas fluorescens.                              | AAB48106.1,<br>ADG03656.1 |             | Q51725 |  |

Subfamily 4H.

| Type     | Sequence                                             | EC Number | Organism                                                                                                  | GenBank ID | RefSeq         | UniProt | PDB |
|----------|------------------------------------------------------|-----------|-----------------------------------------------------------------------------------------------------------|------------|----------------|---------|-----|
| Bacteria | Naringenin-chalcone synthase                         |           | Psychroflexus torquis ATCC 700755.                                                                        | EAS72602.1 | ZP_01252733.1  | Q1VX51  |     |
| Bacteria | Naringenin-chalcone synthase                         |           | Croceibacter atlanticus HTCC2559.                                                                         | EAP86540.1 | YP_003716923.1 | A3U9Q4  |     |
| Bacteria | Naringenin-chalcone synthase                         | 2.3.1.74  | Gramella forsetii (strain KT0803).                                                                        | CAL66583.1 | YP_861650.1    | A0M1T8  |     |
| Bacteria | Chalcone and stilbene synthase domain protein        |           | Spirosoma linguale (strain ATCC 33905 / DSM 74 / LMG 10896).                                              | ADB39198.1 | YP_003387997.1 | D2QMD5  |     |
| Bacteria | 3-oxoacyl-[acyl-carrier-protein (ACP)] synthase III  |           | Polaribacter sp. MED152.                                                                                  | EAQ42771.1 | ZP_01053343.1  | A2TYE6  |     |
| Bacteria | Naringenin-chalcone synthase                         |           | Leeuwenhoekiella blandensis (strain CECT 7118 / CCUG 51940 / MED217) Flavobacterium sp. (strain MED217)). | EAQ50610.1 | ZP_01060142.1  | A3XIK8  |     |
| Bacteria | Chalcone/stilbene synthase family protein            |           | Pedobacter sp. BAL39.                                                                                     | EDM36626.1 | ZP_01884187.1  | A6ED58  |     |
| Bacteria | Chalcone and stilbene synthase domain protein        |           | Pedobacter heparinus (strain ATCC 13125 / DSM 2366 / NCIB 9290).                                          | ACU03855.1 | YP_003091917.1 | C6XUK5  |     |
| Bacteria | Putative uncharacterized protein                     |           | Dokdonia donghaensis MED134.                                                                              | EAQ40026.1 | ZP_01048792.1  | A2TPD4  |     |
| Bacteria | Chalcone/stilbene polyketide synthase family protein |           | Flavobacterium johnsoniae (strain ATCC 17061 / DSM 2064 / UW101) Cytophaga johnsonae).                    | ABQ06819.1 | YP_001196138.1 | A5FDA2  |     |
| Bacteria | Chalcone and stilbene synthase domain protein        |           | Chitinophaga pinensis (strain ATCC 43595 / DSM 2588 / NCIB 11800 / UQM 2034).                             | ACU62466.1 | YP_003124667.1 | C7PPQ6  |     |

Subfamily 4I.

| Type     | Sequence                                                           | EC Number | Organism                                                                                        | GenBank ID | RefSeq         | UniProt | PDB |
|----------|--------------------------------------------------------------------|-----------|-------------------------------------------------------------------------------------------------|------------|----------------|---------|-----|
| Bacteria | COG3424: Predicted naringenin-chalcone synthase                    |           | Magnetospirillum magnetotacticum MS-1                                                           |            | ZP_00209010.1  |         |     |
| Bacteria | Chalcone and stilbene synthases-like                               |           | Acidobacteria bacterium (strain Ellin345).                                                      | ABF42106.1 | YP_592180.1    | Q1ILZ4  |     |
| Bacteria | 3-Oxoacyl-(Acyl-carrier-protein (ACP)) synthase III domain protein |           | Anaeromyxobacter sp. (strain Fw109-5).                                                          | ABS28363.1 | YP_001381347.1 | A7HI17  |     |
| Bacteria | Chalcone/stilbene synthase family protein                          |           | Myxococcus xanthus (strain DK 1622).                                                            | ABF87000.1 | YP_634756.1    | Q1CXW7  |     |
| Bacteria | Putative transferase                                               |           | marine actinobacterium PHSC20C1.                                                                | EAR26190.1 | ZP_01129194.1  | A4AEY9  |     |
| Bacteria | Chalcone and stilbene synthases domain protein                     |           | Mycobacterium gilvum (strain PYR-GCK) (Mycobacterium flavescens strain ATCC 700033 / PYR-GCK)). | ABP46462.1 | YP_001135250.1 | A4TCK2  |     |
| Bacteria | Chalcone and stilbene synthases domain protein                     |           | Mycobacterium gilvum (strain PYR-GCK) (Mycobacterium flavescens strain ATCC 700033 / PYR-GCK)). | ABP47606.1 | YP_001136394.1 | A4T1J7  |     |

|          |                                       |          |                                              |                                                                                                                                     |                                                                                                                                                                                                                                                                                                                                                                                                                                                     |                                                |
|----------|---------------------------------------|----------|----------------------------------------------|-------------------------------------------------------------------------------------------------------------------------------------|-----------------------------------------------------------------------------------------------------------------------------------------------------------------------------------------------------------------------------------------------------------------------------------------------------------------------------------------------------------------------------------------------------------------------------------------------------|------------------------------------------------|
| Bacteria | Possible chalcone synthase pks10      | 2.3.1.74 | Mycobacterium tuberculosis.                  | AAK45967.1, ABQ73417.1, ABR06021.1, ACT25406.1, CAB06631.1, EAY59927.1, EBA42063.1, EFD21690.1, EFD43338.1, EFD53918.1, EFD73332.1, | NP_336153.1, YP_001282979.1, YP_001287623.1, YP_003032301.1, ZP_03416216.1, ZP_03532163.1, ZP_04925185.1, ZP_04980550.1, ZP_05141115.1, ZP_05220457.1, ZP_05772421.1, ZP_06443775.1, ZP_06454556.1, ZP_06505280.1, ZP_06521188.1, ZP_06802302.1, ZP_06951993.1, ZP_06960318.1, ZP_07410109.1, ZP_07414184.1, ZP_07422715.1, ZP_07427083.1, ZP_07431397.1, ZP_07435779.1, ZP_07440026.1, ZP_07444607.1, ZP_07480417.1, ZP_07484615.1, ZP_07488839.1, | A2VIE6, A4KHH8, A5U317, A5WMY2, C6DS11, P94995 |
| Bacteria | chalcone synthase pks10               |          | Mycobacterium tuberculosis CPHL_A            | EFD17431.1                                                                                                                          | ZP_05764084.1, ZP_06437016.1                                                                                                                                                                                                                                                                                                                                                                                                                        |                                                |
| Bacteria | Possible Naringenin-chalcone synthase | 2.3.1.74 | Mycobacterium parascrofulaceum ATCC BAA-614. | EFG79592.1                                                                                                                          | ZP_06847128.1                                                                                                                                                                                                                                                                                                                                                                                                                                       | D5P325                                         |
| Bacteria | Pks10                                 |          | Mycobacterium paratuberculosis.              | AAS03686.1                                                                                                                          | NP_960303.1, ZP_05217077.1                                                                                                                                                                                                                                                                                                                                                                                                                          | Q74012                                         |



|          |                                       |          |                                              |            |                                 |        |  |
|----------|---------------------------------------|----------|----------------------------------------------|------------|---------------------------------|--------|--|
| Bacteria | Pks10 protein                         |          | Mycobacterium avium (strain 104).            | ABK69381.1 | YP_882294.1                     | A0QHA6 |  |
| Bacteria | Possible Naringenin-chalcone synthase | 2.3.1.74 | Mycobacterium parascrofulaceum ATCC BAA-614. | EFG79509.1 | ZP_06847134.1                   | D5P331 |  |
| Bacteria | chalcone synthase pks11               |          | Mycobacterium tuberculosis K85               | EFD43343.1 | ZP_05772426.1,<br>ZP_06454561.1 |        |  |
| Bacteria | chalcone synthase pks11               |          | Mycobacterium tuberculosis CPHL_A            | EFD17437.1 | ZP_05764090.1,<br>ZP_06437022.1 |        |  |

|          |                                  |          |                                                                                |                                                                                                                                                                                                                                             |                                                                                                                                                                                                                                                                                                                                                                                                                                                                                                                                         |                                                                          |
|----------|----------------------------------|----------|--------------------------------------------------------------------------------|---------------------------------------------------------------------------------------------------------------------------------------------------------------------------------------------------------------------------------------------|-----------------------------------------------------------------------------------------------------------------------------------------------------------------------------------------------------------------------------------------------------------------------------------------------------------------------------------------------------------------------------------------------------------------------------------------------------------------------------------------------------------------------------------------|--------------------------------------------------------------------------|
| Bacteria | Possible chalcone synthase pks11 | 2.3.1.74 | Mycobacterium tuberculosis.                                                    | AAK45972.1,<br>ABQ73422.1,<br>ABR06026.1,<br>ACT25401.1,<br>CAB09101.1,<br>EAY59930.1,<br>EBA42068.1,<br>EFD13282.1,<br>EFD21685.1,<br>EFD47114.1,<br>EFD53913.1,<br>EFD58236.1,<br>EFD61772.1,<br>EFD73340.1,<br>EFD77352.1,<br>EFI30253.1 | NP_336158.1,<br>YP_001282984.1,<br>YP_001287628.1,<br>YP_003032296.1,<br>ZP_02551495.1,<br>ZP_03416211.1,<br>ZP_03420122.1,<br>ZP_03424907.1,<br>ZP_03428477.1,<br>ZP_03432605.1,<br>ZP_03532168.1,<br>ZP_03536663.1,<br>ZP_04925188.1,<br>ZP_04980555.1,<br>ZP_05141121.1,<br>ZP_05220462.1,<br>ZP_05768221.1,<br>ZP_06432867.1,<br>ZP_06443770.1,<br>ZP_06449939.1,<br>ZP_06505275.1,<br>ZP_06509598.1,<br>ZP_06513134.1,<br>ZP_06517154.1,<br>ZP_06521196.1,<br>ZP_06802307.1,<br>ZP_06951998.1,<br>ZP_06960323.1,<br>ZP_07012574.1, | A2VIE9,<br>A4KHI3,<br>A5U322,<br>A5WMY7,<br>C6DS06,<br>D7ERA1,<br>O06587 |
| Bacteria | Putative transferase             |          | Streptomyces coelicolor.                                                       | CAC17488.1                                                                                                                                                                                                                                  | NP_631710.1                                                                                                                                                                                                                                                                                                                                                                                                                                                                                                                             | Q9EWQ6                                                                   |
| Bacteria | 3-oxoacyl-(ACP) synthase III     |          | Streptosporangium roseum (strain ATCC 12428 / DSM 43021 / JCM 3005 / NI 9100). | ACZ88684.1                                                                                                                                                                                                                                  | YP_003341427.1                                                                                                                                                                                                                                                                                                                                                                                                                                                                                                                          | D2AU29                                                                   |
| Bacteria | type-III PKS                     |          | Streptomyces roseosporus NRRL 11379                                            |                                                                                                                                                                                                                                             | ZP_04697984.1,<br>ZP_04713181.1                                                                                                                                                                                                                                                                                                                                                                                                                                                                                                         |                                                                          |

|          |                                                |  |                                                  |            |                |        |
|----------|------------------------------------------------|--|--------------------------------------------------|------------|----------------|--------|
| Bacteria | transferase                                    |  | Streptomyces roseosporus NRRL 15998              | EFE79347.1 | ZP_06588886.1  |        |
| Bacteria | Putative uncharacterized protein               |  | Streptomyces sviveus ATCC 29083.                 | EDY57749.1 | ZP_06918562.1  | B5HY44 |
| Bacteria | Chalcone and stilbene synthases domain protein |  | Mycobacterium sp. (strain JLS).                  | ABN98152.1 | YP_001070643.1 | A3PZ25 |
| Bacteria | chalcone synthase                              |  | Mycobacterium kansasii ATCC 12478                |            | ZP_04751145.1  |        |
| Bacteria | Chalcone synthase                              |  | Mycobacterium marinum (strain ATCC BAA-535 / M). | ACC42719.1 | YP_001852574.1 | B2HSZ8 |
| Bacteria | transferase                                    |  | Mycobacterium avium subsp. avium ATCC 25291      |            | ZP_05215672.1  |        |
| Bacteria | Putative uncharacterized protein               |  | Mycobacterium paratuberculosis.                  | AAS04959.1 | NP_961576.1    | Q73WL8 |
| Bacteria | Transferase                                    |  | Mycobacterium avium (strain 104).                | ABK65395.1 | YP_880525.1    | A0QC87 |

## Subfamily 4J.

| Type     | Sequence                                                 | EC Number | Organism                                             | GenBank ID                | RefSeq                                                                              | UniProt             | PDB |
|----------|----------------------------------------------------------|-----------|------------------------------------------------------|---------------------------|-------------------------------------------------------------------------------------|---------------------|-----|
| Bacteria | Naringenin-chalcone synthase                             |           | Anoxybacillus flavithermus (strain DSM 21510 / WK1). | ACJ33731.1                | YP_002315716.1                                                                      | B7GKS5              |     |
| Bacteria | Naringenin-chalcone synthase                             |           | Geobacillus thermodenitrificans (strain NG80-2).     | ABO66772.1                | YP_001125517.1                                                                      | A4IN68              |     |
| Bacteria | Naringenin-chalcone synthase                             | 2.3.1.74  | Bacillus pumilus (strain SAFR-032).                  | ABV62611.1                | YP_001487171.1                                                                      | A8FEE4              |     |
| Bacteria | Putative chalcone synthase (Naringenin-chalconesynthase) | 2.3.1.74  | Bacillus pumilus ATCC 7061.                          | EDW21200.1                | ZP_03055638.1                                                                       | B4AKQ1              |     |
| Bacteria | BcsA                                                     | 2.3.1.74  | Bacillus amyloliquefaciens (strain FZB42).           | ABS74382.1                | YP_001421613.1                                                                      | A7Z5V6              |     |
| Bacteria | Terpene family molecule synthase                         |           | Bacillus subtilis subsp. spizizenii ATCC 6633.       | ADM38200.1,<br>EFG94256.1 | YP_003866509.1,<br>ZP_06871999.1                                                    | D5MV57              |     |
| Bacteria | Naringenin-chalcone synthase                             |           | Bacillus subtilis subsp. natto BEST195.              | BAI85702.1                |                                                                                     | D4FXX1              |     |
| Bacteria | Naringenin-chalcone synthase                             | 2.3.1.74  | Bacillus subtilis.                                   | AAA96613.1,<br>CAB14122.1 | NP_390087.1,<br>ZP_03591968.1,<br>ZP_03596248.1,<br>ZP_03600659.1,<br>ZP_03604935.1 | P54157,<br>P54157.1 |     |
| Bacteria | Naringenin-chalcone synthase                             |           | Bacillus sp. SG-1.                                   | EDL63584.1                | ZP_01861349.1                                                                       | A6CRB1              |     |
| Bacteria | Chalcone and stilbene synthase domain protein            |           | Bacillus cellulosilyticus DSM 2522.                  | EFC16942.1                | ZP_06363263.1                                                                       | D2LVK8              |     |
| Bacteria | naringenin-chalcone synthase                             |           | Lysinibacillus fusiformis ZC1                        | EFI66948.1                | ZP_07051441.1                                                                       |                     |     |
| Bacteria | Putative chalcone synthase                               | 2.3.1.74  | Lysinibacillus sphaericus (strain C3-41).            | ACA41883.1                | YP_001700013.1                                                                      | B1HZM4              |     |

|          |                                                                    |          |                                                                            |            |                |                              |  |
|----------|--------------------------------------------------------------------|----------|----------------------------------------------------------------------------|------------|----------------|------------------------------|--|
| Bacteria | Putative uncharacterized protein                                   |          | Bacillus sp. B14905.                                                       | EAZ86678.1 | ZP_01722746.1  | A3I6Q9                       |  |
| Bacteria | Naringenin-chalcone synthase                                       |          | Bacillus pseudofirmus (strain OF4).                                        | ADC49980.1 | YP_003426872.1 | D3FSL2                       |  |
| Bacteria | Naringenin-chalcone synthase                                       | 2.3.1.74 | Bacillus clausii (strain KSM-K16).                                         | BAD63537.1 | YP_174498.1    | Q5WJB8                       |  |
| Bacteria | Chalcone and stilbene synthase domain protein                      |          | Bacillus tusciae (strain DSM 2912 / NBRC 15312 / T2).                      | ADG07121.1 | YP_003590265.1 | D5WSV2                       |  |
| Bacteria | Chalcone and stilbene synthase domain protein                      |          | Starkeya novella DSM 506.                                                  | ADH91018.1 | YP_003695637.1 | D6ZYP9                       |  |
| Bacteria | Chalcone synthase protein                                          |          | Agrobacterium radiobacter (strain K84 / ATCC BAA-868).                     | ACM25551.1 | YP_002543476.1 | B9J9T3                       |  |
| Bacteria | Chalcone and stilbene synthase domain protein                      |          | Rhizobium leguminosarum bv. trifolii (strain WSM1325).                     | ACS54740.1 | YP_002974279.1 | C6B1M1                       |  |
| Bacteria | Putative uncharacterized protein                                   |          | Rhizobium leguminosarum bv. viciae (strain 3841).                          | CAK06280.1 | YP_766396.1    | Q1ML73                       |  |
| Bacteria | 3-Oxoacyl-(Acyl-carrier-protein (ACP)) synthase III domain protein |          | Rhizobium leguminosarum bv. trifolii (strain WSM2304).                     | ACI53697.1 | YP_002279923.1 | B5ZR65                       |  |
| Bacteria | probable chalcone synthase protein                                 |          | Rhizobium etli 8C-3                                                        |            | ZP_03513853.1  |                              |  |
| Bacteria | Probable chalcone synthase protein                                 | 2.3.1.74 | Rhizobium etli (strain CIAT 652).                                          | ACE89810.1 | YP_001976988.1 | B3PQG4                       |  |
| Bacteria | Probable chalcone synthase protein                                 | 2.3.1.74 | Rhizobium etli (strain CFN 42 / ATCC 51251).                               | ABC89558.1 | YP_468285.1    | Q2KC78                       |  |
| Bacteria | Putative uncharacterized protein                                   | 3.5.1.5  | Rhodobacter sphaeroides (strain ATCC 17029 / ATH 2.4.9).                   | ABN76972.1 | YP_001043744.1 | A3PKV6,<br>A3PL38,<br>A3PLC9 |  |
| Bacteria | Naringenin-chalcone synthase                                       | 2.3.1.74 | Rhodobacter sphaeroides (strain ATCC 17023 / 2.4.1 / NCIB 8253 / DSM 158). | ABA79397.1 | YP_353298.1    | Q3J1D7                       |  |

|          |                                              |          |                                                            |                           |                                |                   |  |
|----------|----------------------------------------------|----------|------------------------------------------------------------|---------------------------|--------------------------------|-------------------|--|
| Bacteria | Probable chalcone synthase protein           | 2.3.1.74 | Rhizobium etli (strain CFN 42 / ATCC 51251).               | AAM55027.1,<br>ACE93764.1 | NP_660014.1,<br>YP_001984314.1 | B3Q258,<br>Q8KKV3 |  |
| Bacteria | probable chalcone synthase protein           |          | Rhizobium etli GR56                                        |                           | ZP_03524522.1                  |                   |  |
| Bacteria | Naringenin-chalcone synthase, putative       | 2.3.1.74 | Pseudovibrio sp. JE062.                                    | EEA93424.1                | ZP_05086158.1                  | B6YYI7            |  |
| Bacteria | Naringenin-chalcone synthase                 | 2.3.1.74 | Roseobacter sp. GAI101.                                    | EEB84054.1                | ZP_05099752.1                  | B7RHQ9            |  |
| Bacteria | Naringenin-chalcone synthase, putative       | 2.3.1.74 | Octadecabacter antarcticus 238.                            | EDY92683.1                | ZP_05067444.1                  | B5K5K6            |  |
| Bacteria | Chalcone synthase, putative                  | 2.3.1.74 | Rhodospirillum centenum (strain ATCC 51521 / SW).          | AAD43969.1,<br>ACI98675.1 | YP_002297488.1                 | B6IT04,<br>Q9XCY2 |  |
| Bacteria | Chalcone synthase, putative                  |          | Heliobacterium modesticaldum (strain ATCC 51547 / Ice1).   | ABZ83023.1                | YP_001679034.1                 | B0TF40            |  |
| Bacteria | Probable naringenin-chalcone synthase        | 2.3.1.74 | Brevibacillus brevis (strain 47 / JCM 6285 / NBRC 100599). | BAH44642.1                | YP_002773146.1                 | COZFT3            |  |
| Bacteria | Chalcone and stilbene synthases-like protein |          | Rubrobacter xylanophilus (strain DSM 9941 / NBRC 16129).   | ABG04050.1                | YP_643862.1                    | Q1AX28            |  |

KS4 outliers.

Outliers

| Type      | Sequence                            | EC Number           | Organism                                               | GenBank ID | RefSeq         | UniProt                 | PDB |                       |
|-----------|-------------------------------------|---------------------|--------------------------------------------------------|------------|----------------|-------------------------|-----|-----------------------|
| Bacteria  | Beta-ketoacyl-ACP synthase III      | 2.3.1.180           | <i>Chlamydomonada caviae</i> .                         | AAP05228.1 | NP_829350.1    | Q820E6,<br>Q820E6.1     |     | Between SubB and SubC |
| Eukaryota | Predicted protein                   |                     | <i>Physcomitrella patens</i> subsp. <i>patens</i> .    | EDQ71691.1 | XP_001763502.1 | A9SAQ7                  |     |                       |
| Eukaryota | Alkylresorcinol synthase            |                     | <i>Physcomitrella patens</i> (Moss).                   | ABU87504.1 |                | A9Q6I2 [T]              |     |                       |
| Eukaryota | Predicted protein                   |                     | <i>Physcomitrella patens</i> subsp. <i>patens</i> .    | EDQ76275.1 | XP_001758769.1 | A9RXI7                  |     |                       |
| Bacteria  | Putative uncharacterized protein    |                     | <i>Parachlamydia acanthamoebae</i> str. Hall's coccus. | EFB40964.1 | ZP_06299952.1  | D1R9E1                  |     | Between SubD and SubE |
| Eukaryota | Beta-ketoacyl synthase              |                     | <i>Naegleria gruberi</i> (Amoeba).                     | EFC48204.1 | XP_002680948.1 | D2V518                  |     |                       |
| Eukaryota | Putative polyketide synthase        |                     | <i>Polysphondylium pallidum</i> PN500.                 | EFA83735.1 |                | D3B337                  |     |                       |
| Eukaryota | Steely1                             | 2.3.1.-<br>2.3.1.74 | <i>Dictyostelium discoideum</i> (Slime mold).          | EAL72032.1 | XP_645909.1    | Q55E72 [P],<br>Q55E72.1 |     | Between SubH and SubI |
| Bacteria  | Genome sequencing data, contig C325 |                     | <i>Microcystis aeruginosa</i> PCC 7806.                | CAO90358.1 |                | A8YL07                  |     |                       |

KS4 phylogenetic tree.

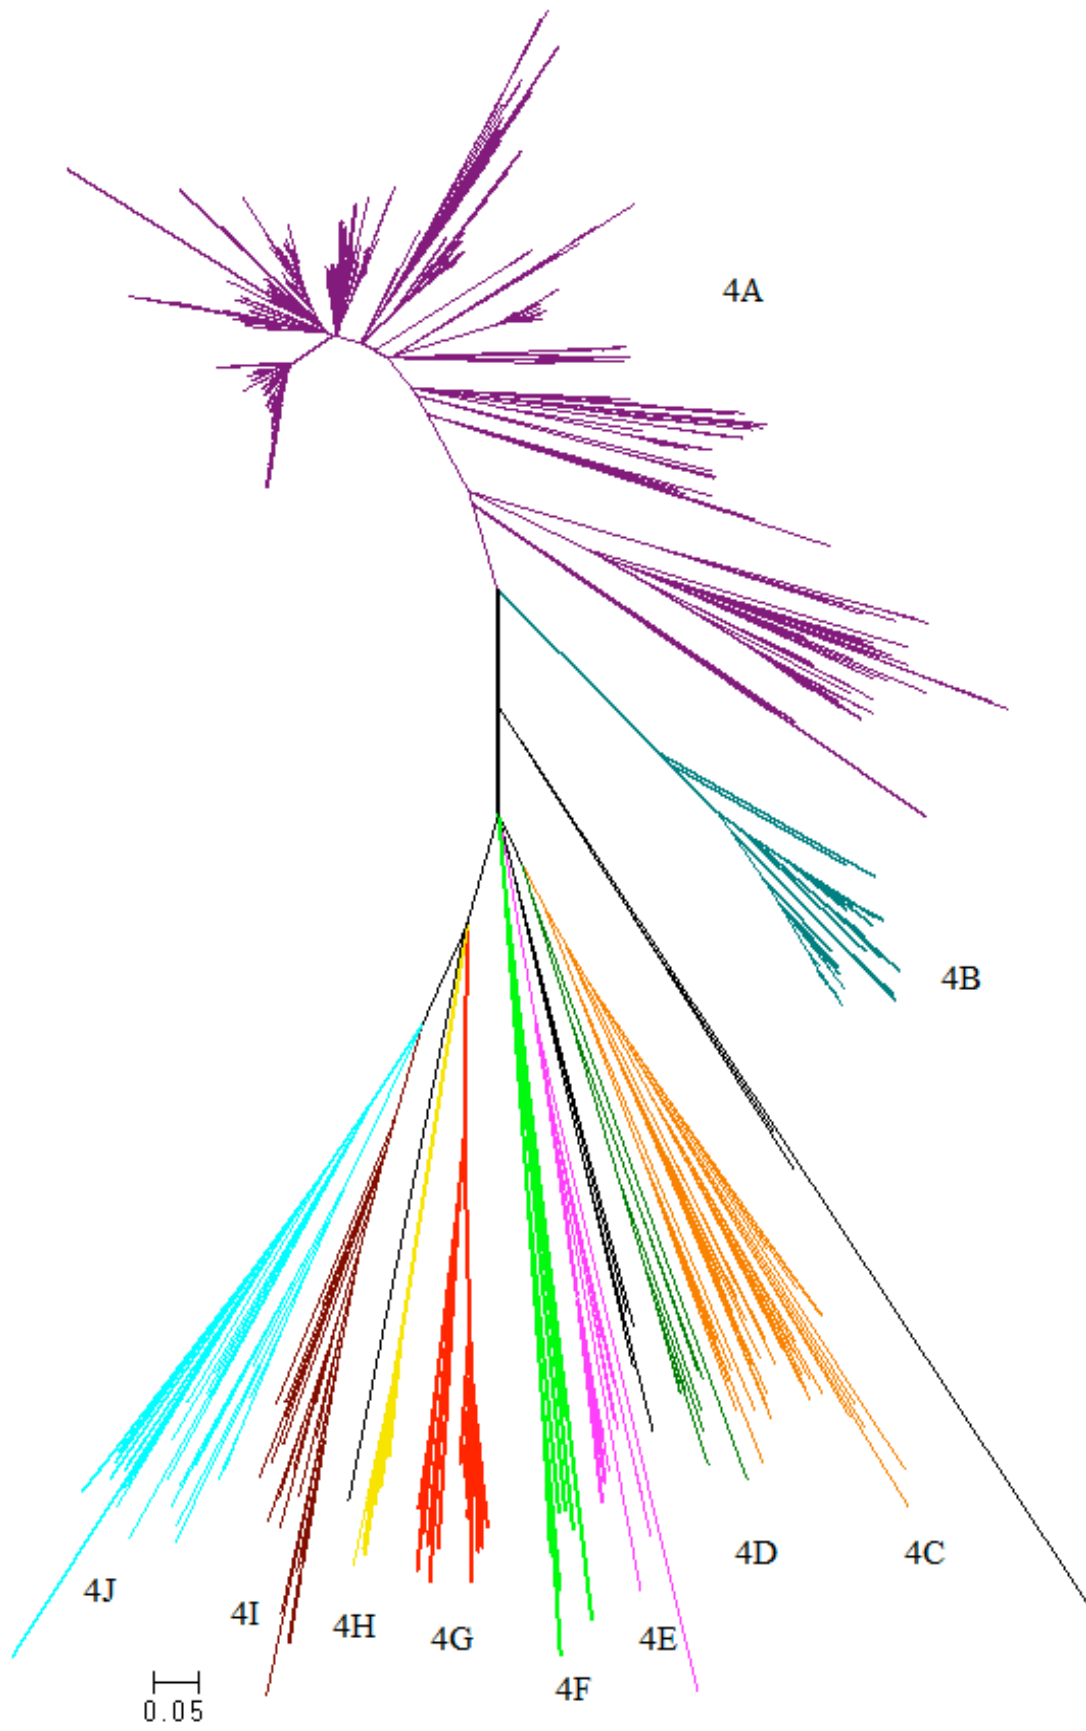

Supplement: pro0020-1659-SD7.pdf [file pro0020-1659-SD7.pdf]
