# Supplementary material
Source: PubMed Central journal article supplement (PMC3218358)

Table S5.

| KS5-SubA  |                                     |           |                                                                                   |            |                |         |     |
|-----------|-------------------------------------|-----------|-----------------------------------------------------------------------------------|------------|----------------|---------|-----|
| Type      | Sequence                            | EC Number | Organism                                                                          | GenBank ID | RefSeq         | UniProt | PDB |
| Eukaryota | GI19161                             |           | <i>Drosophila mojavensis</i> (Fruit fly).                                         | EDW09227.1 | XP_002005292.1 | B4KQ99  |     |
| Eukaryota | GJ22296                             |           | <i>Drosophila virilis</i> (Fruit fly).                                            | EDW61875.1 | XP_002050682.1 | B4LLC3  |     |
| Eukaryota | AGAP005512-PA                       |           | <i>Anopheles gambiae</i> (African malaria mosquito).                              | EAA11215.4 | XP_315512.4    | Q7Q747  |     |
| Eukaryota | AGAP005513-PA                       |           | <i>Anopheles gambiae</i> (African malaria mosquito).                              | EAA11161.4 | XP_315513.4    | Q7Q746  |     |
| Eukaryota | Elongase                            |           | <i>Culex quinquefasciatus</i> (Southern house mosquito) ( <i>Culex pungens</i> ). | EDS25728.1 | XP_001841775.1 | B0VZ85  |     |
| Eukaryota | Elongase, putative                  |           | <i>Aedes aegypti</i> (Yellowfever mosquito) ( <i>Culex aegypti</i> ).             | EAT34080.1 | XP_001663836.1 | Q16II6  |     |
| Eukaryota | PREDICTED: similar to<br>GA18780-PA |           | <i>Nasonia vitripennis</i>                                                        |            | XP_001607111.1 |         |     |
| Eukaryota | AGAP005511-PA                       |           | <i>Anopheles gambiae</i> (African malaria mosquito).                              | EAU76464.2 | XP_001237679.2 | A0NEE5  |     |
| Eukaryota | GF13757                             |           | <i>Drosophila ananassae</i> (Fruit fly).                                          | EDV38038.1 | XP_001961216.1 | B3MI28  |     |
| Eukaryota | GG20949                             |           | <i>Drosophila erecta</i> (Fruit fly).                                             | EDV55128.1 | XP_001974728.1 | B3NKA6  |     |
| Eukaryota | GE13887                             |           | <i>Drosophila yakuba</i> (Fruit fly).                                             | EDW91582.1 | XP_002091870.1 | B4P496  |     |

|           |          |  |                                                            |                           |                |               |  |
|-----------|----------|--|------------------------------------------------------------|---------------------------|----------------|---------------|--|
| Eukaryota | AT24031p |  | <i>Drosophila melanogaster</i> (Fruit fly).                | AAL90154.1                |                | Q8T400<br>[T] |  |
| Eukaryota | CG17821  |  | <i>Drosophila melanogaster</i> (Fruit fly).                | AAF57646.3                | NP_725820.2    | A1ZBD2        |  |
| Eukaryota | GM19879  |  | <i>Drosophila sechellia</i> (Fruit fly).                   | EDW48511.1                | XP_002034498.1 | B4HP09        |  |
| Eukaryota | GD25362  |  | <i>Drosophila simulans</i> (Fruit fly).                    | EDX07729.1                | XP_002082144.1 | B4QD24        |  |
| Eukaryota | GK20710  |  | <i>Drosophila willistoni</i> (Fruit fly).                  | EDW72442.1                | XP_002061456.1 | B4MK03        |  |
| Eukaryota | GF13758  |  | <i>Drosophila ananassae</i> (Fruit fly).                   | EDV38039.1                | XP_001961217.1 | B3MI29        |  |
| Eukaryota | GA15013  |  | <i>Drosophila pseudoobscura pseudoobscura</i> (Fruit fly). | EAL24988.2                | XP_001360413.2 | Q291X4        |  |
| Eukaryota | GL11311  |  | <i>Drosophila persimilis</i> (Fruit fly).                  | EDW31798.1                | XP_002015908.1 | B4GA46        |  |
| Eukaryota | GE13888  |  | <i>Drosophila yakuba</i> (Fruit fly).                      | EDW91583.1                | XP_002091871.1 | B4P497        |  |
| Eukaryota | GG20950  |  | <i>Drosophila erecta</i> (Fruit fly).                      | EDV55127.1                | XP_001974727.1 | B3NKA5        |  |
| Eukaryota | RE06553p |  | <i>Drosophila melanogaster</i> (Fruit fly).                | AAF57647.2,<br>AAR99140.1 | NP_611365.2    | Q6NN18<br>[T] |  |
| Eukaryota | GM19880  |  | <i>Drosophila sechellia</i> (Fruit fly).                   | EDW48510.1                | XP_002034497.1 | B4HP08        |  |
| Eukaryota | GD25363  |  | <i>Drosophila simulans</i> (Fruit fly).                    | EDX07728.1                | XP_002082143.1 | B4QD23        |  |

|           |         |  |                                                                        |            |                |               |  |
|-----------|---------|--|------------------------------------------------------------------------|------------|----------------|---------------|--|
| Eukaryota | GH19804 |  | <i>Drosophila grimshawi</i> (Fruit fly) ( <i>Idiomyia grimshawi</i> ). | EDW02596.1 | XP_001987729.1 | B4JA09        |  |
| Eukaryota | GI20347 |  | <i>Drosophila mojavensis</i> (Fruit fly).                              | EDW09119.1 | XP_002005184.1 | B4KPK9        |  |
| Eukaryota | GI20343 |  | <i>Drosophila mojavensis</i> (Fruit fly).                              | EDW09116.1 | XP_002005181.1 | B4KPK6        |  |
| Eukaryota | GJ22069 |  | <i>Drosophila virilis</i> (Fruit fly).                                 | EDW61477.1 | XP_002050284.1 | B4LJ41        |  |
| Eukaryota | GK20708 |  | <i>Drosophila willistoni</i> (Fruit fly).                              | EDW72444.1 | XP_002061458.1 | B4MK05        |  |
| Eukaryota | GK20709 |  | <i>Drosophila willistoni</i> (Fruit fly).                              | EDW72443.1 | XP_002061457.1 | B4MK04        |  |
| Eukaryota | GK20706 |  | <i>Drosophila willistoni</i> (Fruit fly).                              | EDW72445.1 | XP_002061459.1 | B4MK06        |  |
| Eukaryota | GI10225 |  | <i>Drosophila mojavensis</i> (Fruit fly).                              | EDW15885.1 | XP_002000424.1 | B4KCN6        |  |
| Eukaryota | GJ11026 |  | <i>Drosophila virilis</i> (Fruit fly).                                 | EDW59703.1 | XP_002056591.1 | B4M4Z2        |  |
| Eukaryota | GI10223 |  | <i>Drosophila mojavensis</i> (Fruit fly).                              | EDW15884.1 | XP_002000423.1 | B4KCN5        |  |
| Eukaryota | GH22831 |  | <i>Drosophila grimshawi</i> (Fruit fly) ( <i>Idiomyia grimshawi</i> ). | EDV94802.1 | XP_001994066.1 | B4JSR2        |  |
| Eukaryota | GJ11028 |  | <i>Drosophila virilis</i> (Fruit fly).                                 | EDW59705.1 | XP_002056593.1 | B4M4Z4        |  |
| Eukaryota | CG31141 |  | <i>Drosophila melanogaster</i> (Fruit fly).                            | AAN13958.2 | NP_732912.2    | Q8IMY2<br>[T] |  |

|           |          |  |                                                            |                           |                |               |
|-----------|----------|--|------------------------------------------------------------|---------------------------|----------------|---------------|
| Eukaryota | GD21043  |  | <i>Drosophila simulans</i> (Fruit fly).                    | EDX14122.1                | XP_002104619.1 | B4QSC3        |
| Eukaryota | GM26535  |  | <i>Drosophila sechellia</i> (Fruit fly).                   | EDW43393.1                | XP_002032407.1 | B4HG00        |
| Eukaryota | GE10400  |  | <i>Drosophila yakuba</i> (Fruit fly).                      | EDW98204.1                | XP_002098492.1 | B4PNZ4        |
| Eukaryota | GG11234  |  | <i>Drosophila erecta</i> (Fruit fly).                      | EDV53951.1                | XP_001982081.1 | B3P8C7        |
| Eukaryota | GL23223  |  | <i>Drosophila persimilis</i> (Fruit fly).                  | EDW24749.1                | XP_002013763.1 | B4G583        |
| Eukaryota | GA14209  |  | <i>Drosophila pseudoobscura pseudoobscura</i> (Fruit fly). | EAL27712.2                | XP_001358571.2 | Q299J0        |
| Eukaryota | GE24724  |  | <i>Drosophila yakuba</i> (Fruit fly).                      | EDW96740.1                | XP_002097028.1 | B4PVG7        |
| Eukaryota | GG17320  |  | <i>Drosophila erecta</i> (Fruit fly).                      | EDV49697.1                | XP_001980739.1 | B3P4P4        |
| Eukaryota | GH01164p |  | <i>Drosophila melanogaster</i> (Fruit fly).                | AAF54462.1,<br>AAM48321.1 | NP_649957.1    | Q9VH57<br>[P] |
| Eukaryota | GM26206  |  | <i>Drosophila sechellia</i> (Fruit fly).                   | EDW42799.1                | XP_002031813.1 | B4HJC7        |
| Eukaryota | GD20753  |  | <i>Drosophila simulans</i> (Fruit fly).                    | EDX13553.1                | XP_002104050.1 | B4QVX3        |
| Eukaryota | GF22463  |  | <i>Drosophila ananassae</i> (Fruit fly).                   | EDV32925.1                | XP_001964791.1 | B3MUL0        |
| Eukaryota | GF13996  |  | <i>Drosophila ananassae</i> (Fruit fly).                   | EDV32547.1                | XP_001963326.1 | B3MKN4        |

|           |          |  |                                                            |                                          |                |               |
|-----------|----------|--|------------------------------------------------------------|------------------------------------------|----------------|---------------|
| Eukaryota | GG17319  |  | <i>Drosophila erecta</i> (Fruit fly).                      | EDV49696.1                               | XP_001980738.1 | B3P4P3        |
| Eukaryota | GE24723  |  | <i>Drosophila yakuba</i> (Fruit fly).                      | EDW96741.1                               | XP_002097029.1 | B4PVG8        |
| Eukaryota | IP10372p |  | <i>Drosophila melanogaster</i> (Fruit fly).                | AAF54463.2,<br>AAY55750.1,<br>AAY55798.1 | NP_649958.2    | Q4V3H4<br>[T] |
| Eukaryota | GD20752  |  | <i>Drosophila simulans</i> (Fruit fly).                    | EDX13552.1                               | XP_002104049.1 | B4QVX2        |
| Eukaryota | GM26205  |  | <i>Drosophila sechellia</i> (Fruit fly).                   | EDW42798.1                               | XP_002031812.1 | B4HJC6        |
| Eukaryota | GF17148  |  | <i>Drosophila ananassae</i> (Fruit fly).                   | EDV42161.1                               | XP_001953600.1 | B3M1D4        |
| Eukaryota | GG17318  |  | <i>Drosophila erecta</i> (Fruit fly).                      | EDV49695.1                               | XP_001980737.1 | B3P4P2        |
| Eukaryota | GE24722  |  | <i>Drosophila yakuba</i> (Fruit fly).                      | EDW96742.1                               | XP_002097030.1 | B4PVG9        |
| Eukaryota | IP10371p |  | <i>Drosophila melanogaster</i> (Fruit fly).                | AAF54464.1,<br>AAY55794.1                | NP_731419.1    | Q9VH55<br>[P] |
| Eukaryota | GD20751  |  | <i>Drosophila simulans</i> (Fruit fly).                    | EDX13551.1                               | XP_002104048.1 | B4QVX1        |
| Eukaryota | GL23222  |  | <i>Drosophila persimilis</i> (Fruit fly).                  | EDW24750.1                               | XP_002013764.1 | B4G584        |
| Eukaryota | GA21802  |  | <i>Drosophila pseudoobscura pseudoobscura</i> (Fruit fly). | EAL27713.2                               | XP_001358572.2 | Q299J1        |
| Eukaryota | GF15498  |  | <i>Drosophila ananassae</i> (Fruit fly).                   | EDV31725.1                               | XP_001962504.1 | B3MLH6        |

|           |                                                    |  |                                                |            |                |               |  |
|-----------|----------------------------------------------------|--|------------------------------------------------|------------|----------------|---------------|--|
| Eukaryota | GF15497                                            |  | <i>Drosophila ananassae</i> (Fruit fly).       | EDV31724.1 | XP_001962503.1 | B3MLH5        |  |
| Eukaryota | GD18654                                            |  | <i>Drosophila simulans</i> (Fruit fly).        | EDX13554.1 | XP_002104051.1 | B4QVX4        |  |
| Eukaryota | GM23846                                            |  | <i>Drosophila sechellia</i> (Fruit fly).       | EDW42800.1 | XP_002031814.1 | B4HJC8        |  |
| Eukaryota | GG17214                                            |  | <i>Drosophila erecta</i> (Fruit fly).          | EDV49698.1 | XP_001980740.1 | B3P4P5        |  |
| Eukaryota | GE25994                                            |  | <i>Drosophila yakuba</i> (Fruit fly).          | EDW96738.1 | XP_002097026.1 | B4PVG5        |  |
| Eukaryota | MIP05430p                                          |  | <i>Drosophila melanogaster</i> (Fruit fly).    | ACX53668.1 |                | C9QPA5<br>[T] |  |
| Eukaryota | CG8534                                             |  | <i>Drosophila melanogaster</i> (Fruit fly).    | AAF54460.1 | NP_649955.1    | Q9VH59<br>[T] |  |
| Eukaryota | GM23845                                            |  | <i>Drosophila sechellia</i> (Fruit fly).       | EDW42801.1 | XP_002031815.1 | B4HJC9        |  |
| Eukaryota | GD18652                                            |  | <i>Drosophila simulans</i> (Fruit fly).        | EDX13555.1 | XP_002104052.1 | B4QVX5        |  |
| Eukaryota | PREDICTED: similar to<br>AGAP007264-PA             |  | <i>Tribolium castaneum</i>                     |            | XP_973993.2    |               |  |
| Eukaryota | Putative<br>uncharacterized<br>protein GLEAN_15657 |  | <i>Tribolium castaneum</i> (Red flour beetle). | EFA05473.1 |                | D2A678        |  |
| Eukaryota | PREDICTED: similar to<br>elongase, putative        |  | <i>Acyrtosiphon pisum</i>                      |            | XP_001942907.1 |               |  |
| Eukaryota | PREDICTED: similar to<br>GA19958-PA                |  | <i>Acyrtosiphon pisum</i>                      |            | XP_001952377.1 |               |  |

|           |                                                             |  |                                                     |                                                         |                                             |               |  |
|-----------|-------------------------------------------------------------|--|-----------------------------------------------------|---------------------------------------------------------|---------------------------------------------|---------------|--|
| Eukaryota | ACYPI007931 protein                                         |  | Acyrtosiphon pisum (Pea aphid).                     | BAH72041.1                                              |                                             | C4WVX1<br>[T] |  |
| Eukaryota | GK12817                                                     |  | Drosophila willistoni (Fruit fly).                  | EDW85037.1                                              | XP_002074051.1                              | B4NJS5        |  |
| Eukaryota | GL13809                                                     |  | Drosophila persimilis (Fruit fly).                  | EDW38920.1                                              | XP_002020108.1                              | B4GP37        |  |
| Eukaryota | GA19958                                                     |  | Drosophila pseudoobscura pseudoobscura (Fruit fly). | EAL26992.1                                              | XP_001357857.1                              | Q29BK4        |  |
| Eukaryota | GF18858                                                     |  | Drosophila ananassae (Fruit fly).                   | EDV44190.1                                              | XP_001955629.1                              | B3M000        |  |
| Eukaryota | GD20962                                                     |  | Drosophila simulans (Fruit fly).                    | EDX13945.1                                              | XP_002104442.1                              | B4R0M2        |  |
| Eukaryota | GM26443                                                     |  | Drosophila sechellia (Fruit fly).                   | EDW43207.1                                              | XP_002032221.1                              | B4HEP6        |  |
| Eukaryota | GG11145                                                     |  | Drosophila erecta (Fruit fly).                      | EDV54129.1                                              | XP_001982259.1                              | B3P8N4        |  |
| Eukaryota | MIP08184p                                                   |  | Drosophila melanogaster (Fruit fly).                | ACT88147.1                                              |                                             | C6SV14<br>[T] |  |
| Eukaryota | LD14839p                                                    |  | Drosophila melanogaster (Fruit fly).                | AAF56018.1,<br>AAL28730.1,<br>AAN13910.2,<br>AAN13911.1 | NP_651062.3,<br>NP_732761.1,<br>NP_732762.1 | Q9VCY7<br>[T] |  |
| Eukaryota | GE10310                                                     |  | Drosophila yakuba (Fruit fly).                      | EDW98020.1                                              | XP_002098308.1                              | B4PMB5        |  |
| Eukaryota | elongation of very long chain fatty acids protein, putative |  | Pediculus humanus corporis USDA                     | EEB15720.1                                              | XP_002428458.1                              |               |  |

|           |                                                             |  |                                                                   |            |                |            |  |
|-----------|-------------------------------------------------------------|--|-------------------------------------------------------------------|------------|----------------|------------|--|
| Eukaryota | Putative uncharacterized protein                            |  | Tribolium castaneum (Red flour beetle).                           | EFA10643.1 | XP_967030.1    | D6X2U5     |  |
| Eukaryota | Putative uncharacterized protein                            |  | Tribolium castaneum (Red flour beetle).                           | EFA00083.1 |                | D6WHH9     |  |
| Eukaryota | PREDICTED: similar to elongase, putative                    |  | Tribolium castaneum                                               |            | XP_975397.2    |            |  |
| Eukaryota | PREDICTED: similar to GA16297-PA                            |  | Acyrtosiphon pisum                                                |            | XP_001951537.1 |            |  |
| Eukaryota | Elongase                                                    |  | Culex quinquefasciatus (Southern house mosquito) (Culex pungens). | EDS39480.1 | XP_001864000.1 | B0X2X8     |  |
| Eukaryota | Elongase, putative                                          |  | Aedes aegypti (Yellowfever mosquito) (Culex aegypti).             | EAT48780.1 | XP_001658888.1 | Q17Q14     |  |
| Eukaryota | GK11478                                                     |  | Drosophila willistoni (Fruit fly).                                | EDW80599.1 | XP_002069613.1 | B4N9N4     |  |
| Eukaryota | CG6660                                                      |  | Drosophila melanogaster (Fruit fly).                              | AAF56072.1 | NP_651104.1    | Q9VCT3 [P] |  |
| Eukaryota | IP10055p                                                    |  | Drosophila melanogaster (Fruit fly).                              | AAV55686.1 |                | Q4V3T6 [T] |  |
| Eukaryota | Elongation of very long chain fatty acids protein 4         |  | Culex quinquefasciatus (Southern house mosquito) (Culex pungens). | EDS39481.1 | XP_001864001.1 | B0X2X9     |  |
| Eukaryota | AGAP003197-PA                                               |  | Anopheles gambiae (African malaria mosquito).                     | EAL40729.3 | XP_562969.3    | Q5TTH1     |  |
| Eukaryota | AGAP003195-PA                                               |  | Anopheles gambiae (African malaria mosquito).                     | EAU77013.1 | XP_001237502.1 | A0NDA4     |  |
| Eukaryota | elongation of very long chain fatty acids protein, putative |  | Pediculus humanus corporis USDA                                   | EEB15718.1 | XP_002428456.1 |            |  |



|           |                                                             |  |                                                                   |            |                |               |  |
|-----------|-------------------------------------------------------------|--|-------------------------------------------------------------------|------------|----------------|---------------|--|
| Eukaryota | ACYPI003344 protein                                         |  | Acyrtosiphon pisum (Pea aphid).                                   | BAH72780.1 |                | C4WY10<br>[T] |  |
| Eukaryota | PREDICTED: similar to elongase, putative                    |  | Acyrtosiphon pisum                                                |            | XP_001947506.1 |               |  |
| Eukaryota | PREDICTED: similar to elongase, putative                    |  | Acyrtosiphon pisum                                                |            | XP_001947312.1 |               |  |
| Eukaryota | ACYPI005277 protein                                         |  | Acyrtosiphon pisum (Pea aphid).                                   | BAH71168.1 |                | C4WTE8<br>[T] |  |
| Eukaryota | PREDICTED: similar to elongase, putative                    |  | Nasonia vitripennis                                               |            | XP_001599867.1 |               |  |
| Eukaryota | Elongase, putative                                          |  | Aedes aegypti (Yellowfever mosquito) (Culex aegypti).             | EAT40021.1 | XP_001659028.1 | Q16ZG9        |  |
| Eukaryota | Elongation of very long chain fatty acids protein 4         |  | Culex quinquefasciatus (Southern house mosquito) (Culex pungens). | EDS32245.1 | XP_001843382.1 | BOW3U8        |  |
| Eukaryota | elongation of very long chain fatty acids protein, putative |  | Pediculus humanus corporis USDA                                   | EEB14961.1 | XP_002427699.1 |               |  |
| Eukaryota | elongation of very long chain fatty acids protein, putative |  | Pediculus humanus corporis USDA                                   | EEB15719.1 | XP_002428457.1 |               |  |

## KS5-SubB

| Type      | Sequence                          | EC Number | Organism                                           | GenBank ID | RefSeq         | UniProt | PDB |
|-----------|-----------------------------------|-----------|----------------------------------------------------|------------|----------------|---------|-----|
| Eukaryota | Fatty acyl-CoA elongase, putative |           | Ixodes scapularis (Black-legged tick) (Deer tick). | EEC04105.1 | XP_002409062.1 | B7PBY3  |     |
| Eukaryota | Fatty acyl-CoA elongase, putative |           | Ixodes scapularis (Black-legged tick) (Deer tick). | EEC20289.1 | XP_002400747.1 | B7QN67  |     |
| Eukaryota | Fatty acyl-CoA elongase, putative |           | Ixodes scapularis (Black-legged tick) (Deer tick). | EEC20291.1 | XP_002400749.1 | B7QN69  |     |
| Eukaryota | Fatty acyl-CoA elongase, putative |           | Ixodes scapularis (Black-legged tick) (Deer tick). | EEC17384.1 | XP_002414076.1 | B7QEW2  |     |
| Eukaryota | Fatty acyl-CoA elongase, putative |           | Ixodes scapularis (Black-legged tick) (Deer tick). | EEC04438.1 | XP_002410351.1 | B7PCW6  |     |
| Eukaryota | Fatty acyl-CoA elongase, putative |           | Ixodes scapularis (Black-legged tick) (Deer tick). | EEC13956.1 | XP_002401424.1 | B7Q534  |     |
| Eukaryota | Fatty acyl-CoA elongase, putative |           | Ixodes scapularis (Black-legged tick) (Deer tick). | EEC01635.1 | XP_002406518.1 | B7P4W3  |     |
| Eukaryota | Fatty acyl-CoA elongase, putative |           | Ixodes scapularis (Black-legged tick) (Deer tick). | EEC01636.1 | XP_002406519.1 | B7P4W4  |     |
| Eukaryota | Fatty acyl-CoA elongase, putative |           | Ixodes scapularis (Black-legged tick) (Deer tick). | EEC04694.1 | XP_002410958.1 | B7PDM2  |     |
| Eukaryota | Fatty acyl-CoA elongase, putative |           | Ixodes scapularis (Black-legged tick) (Deer tick). | EEC20298.1 | XP_002400756.1 | B7QN76  |     |
| Eukaryota | Fatty acyl-CoA elongase, putative |           | Ixodes scapularis (Black-legged tick) (Deer tick). | EEC09162.1 | XP_002399480.1 | B7PRE0  |     |
| Eukaryota | Fatty acyl-CoA elongase, putative |           | Ixodes scapularis (Black-legged tick) (Deer tick). | EEC18466.1 | XP_002414801.1 | B7QHZ4  |     |

|           |                                   |  |                                                       |            |                |        |  |
|-----------|-----------------------------------|--|-------------------------------------------------------|------------|----------------|--------|--|
| Eukaryota | Fatty acyl-CoA elongase, putative |  | Ixodes scapularis (Black-legged tick)<br>(Deer tick). | EEC09160.1 | XP_002399478.1 | B7PRD8 |  |
| Eukaryota | Fatty acyl-CoA elongase, putative |  | Ixodes scapularis (Black-legged tick)<br>(Deer tick). | EEC15529.1 | XP_002406058.1 | B7Q9K7 |  |
| Eukaryota | Fatty acyl-CoA elongase, putative |  | Ixodes scapularis (Black-legged tick)<br>(Deer tick). | EEC15041.1 | XP_002404768.1 | B7Q869 |  |
| Eukaryota | Fatty acyl-CoA elongase, putative |  | Ixodes scapularis (Black-legged tick)<br>(Deer tick). | EEC20302.1 | XP_002400760.1 | B7QN80 |  |
| Eukaryota | Fatty acyl-CoA elongase, putative |  | Ixodes scapularis (Black-legged tick)<br>(Deer tick). | EEC20299.1 | XP_002400757.1 | B7QN77 |  |
| Eukaryota | Fatty acyl-CoA elongase, putative |  | Ixodes scapularis (Black-legged tick)<br>(Deer tick). | EEC20303.1 | XP_002400761.1 | B7QN81 |  |
| Eukaryota | Fatty acyl-CoA elongase, putative |  | Ixodes scapularis (Black-legged tick)<br>(Deer tick). | EEC14591.1 | XP_002403442.1 | B7Q6W9 |  |
| Eukaryota | Fatty acyl-CoA elongase, putative |  | Ixodes scapularis (Black-legged tick)<br>(Deer tick). | EEC02854.1 | XP_002401846.1 | B7P8D2 |  |
| Eukaryota | Fatty acyl-CoA elongase, putative |  | Ixodes scapularis (Black-legged tick)<br>(Deer tick). | EEC06381.1 | XP_002404990.1 | B7PIF9 |  |
| Eukaryota | Fatty acyl-CoA elongase, putative |  | Ixodes scapularis (Black-legged tick)<br>(Deer tick). | EEC02754.1 | XP_002400875.1 | B7P832 |  |
| Eukaryota | Fatty acyl-CoA elongase, putative |  | Ixodes scapularis (Black-legged tick)<br>(Deer tick). | EEC02753.1 | XP_002400874.1 | B7P831 |  |
| Eukaryota | Fatty acyl-CoA elongase, putative |  | Ixodes scapularis (Black-legged tick)<br>(Deer tick). | EEC02752.1 | XP_002400873.1 | B7P830 |  |
| Eukaryota | Fatty acyl-CoA elongase, putative |  | Ixodes scapularis (Black-legged tick)<br>(Deer tick). | EEC12340.1 | XP_002407675.1 | B7Q0G8 |  |

|           |                                                              |  |                                                    |            |                |            |  |
|-----------|--------------------------------------------------------------|--|----------------------------------------------------|------------|----------------|------------|--|
| Eukaryota | Fatty acyl-CoA elongase, putative                            |  | Ixodes scapularis (Black-legged tick) (Deer tick). | EEC02750.1 | XP_002400871.1 | B7P828     |  |
| Eukaryota | Fatty acyl-CoA elongase, putative                            |  | Ixodes scapularis (Black-legged tick) (Deer tick). | EEC02749.1 | XP_002400870.1 | B7P827     |  |
| Eukaryota | Fatty acyl-CoA elongase, putative                            |  | Ixodes scapularis (Black-legged tick) (Deer tick). | EEC20292.1 | XP_002400750.1 | B7QN70     |  |
| Eukaryota | Fatty acyl-CoA elongase, putative                            |  | Ixodes scapularis (Black-legged tick) (Deer tick). | EEC20293.1 | XP_002400751.1 | B7QN71     |  |
| Eukaryota | Fatty acyl-CoA elongase, putative                            |  | Ixodes scapularis (Black-legged tick) (Deer tick). | EEC20297.1 | XP_002400755.1 | B7QN75     |  |
| Eukaryota | Fatty acyl-CoA elongase, putative                            |  | Ixodes scapularis (Black-legged tick) (Deer tick). | EEC09159.1 | XP_002399477.1 | B7PRD7     |  |
| Eukaryota | Fatty acyl-CoA elongase, putative                            |  | Ixodes scapularis (Black-legged tick) (Deer tick). | EEC20296.1 | XP_002400754.1 | B7QN74     |  |
| Eukaryota | Fatty acyl-CoA elongase, putative                            |  | Ixodes scapularis (Black-legged tick) (Deer tick). | EEC04697.1 | XP_002410961.1 | B7PDM5     |  |
| Eukaryota | Fatty acyl-CoA elongase, putative                            |  | Ixodes scapularis (Black-legged tick) (Deer tick). | EEC18787.1 | XP_002415122.1 | B7QIW5     |  |
| Eukaryota | Fatty acyl-CoA elongase, putative                            |  | Ixodes scapularis (Black-legged tick) (Deer tick). | EEC08456.1 | XP_002435626.1 | B7PPD4     |  |
| Eukaryota | Fatty acyl-CoA elongase, putative                            |  | Ixodes scapularis (Black-legged tick) (Deer tick). | EEC18783.1 | XP_002415118.1 | B7QIW1     |  |
| Eukaryota | Elongation of very long chain fatty acids protein AAEL008004 |  | Lepeophtheirus salmonis (salmon louse).            | ACO12429.1 |                | C1BTS6 [T] |  |
| Eukaryota | Elongation of very long chain fatty acids protein AAEL008004 |  | Caligus clemensi.                                  | ACO15214.1 |                | C1C1R1 [T] |  |

|           |                                                              |  |                        |            |  |            |  |
|-----------|--------------------------------------------------------------|--|------------------------|------------|--|------------|--|
| Eukaryota | Elongation of very long chain fatty acids protein AAEL008004 |  | Caligus clemensi.      | AC015291.1 |  | C1C1Y8 [T] |  |
| Eukaryota | Elongation of very long chain fatty acids protein AAEL008004 |  | Caligus rogercresseyi. | AC010789.1 |  | C1BP36 [T] |  |

## KS5-SubC

| Type      | Sequence                                                                                                                                | EC Numb | Organism                                                              | GenBank ID                | RefSeq                         | UniProt    | PDB |
|-----------|-----------------------------------------------------------------------------------------------------------------------------------------|---------|-----------------------------------------------------------------------|---------------------------|--------------------------------|------------|-----|
| Eukaryota | Zgc:112263                                                                                                                              |         | Danio rerio (Zebrafish)<br>(Brachydanio rerio).                       | AAH95712.1                | NP_001019609.1                 | Q502G0 [T] |     |
| Eukaryota | Novel protein similar to vertebrate elongation of very long chain fatty acids (FEN1/Elo2, SUR4/Elo3, yeast)-like (Zgc:112263)           |         | Danio rerio (Zebrafish)<br>(Brachydanio rerio).                       | CAX13621.1                |                                | B8JJK4     |     |
| Eukaryota | LOC100135292 protein                                                                                                                    |         | Xenopus tropicalis<br>(Western clawed frog)<br>(Silurana tropicalis). | AAI57588.1                | NP_001107444.1                 | A9UMA8 [T] |     |
| Eukaryota | PREDICTED: hypothetical protein                                                                                                         |         | Taeniopygia guttata                                                   |                           | XP_002188337.1                 |            |     |
| Eukaryota | MGC115163 protein                                                                                                                       |         | Xenopus laevis (African<br>clawed frog).                              | AAH93571.1                | NP_001089378.1                 | Q566F8 [T] |     |
| Eukaryota | PREDICTED: hypothetical protein                                                                                                         |         | Strongylocentrotus<br>purpuratus                                      |                           | XP_001194650.1,<br>XP_797869.2 |            |     |
| Eukaryota | Novel protein similar to vertebrate elongation of very long chain fatty acids (FEN1/Elo2, SUR4/Elo3, yeast)-like 1 (ELOVL1, zgc:103538) |         | Danio rerio (Zebrafish)<br>(Brachydanio rerio).                       | CAN88636.1                |                                | A5PMD4     |     |
| Eukaryota | Novel protein similar to vertebrate elongation of very long chain fatty acids (FEN1/Elo2, SUR4/Elo3, yeast)-like 1 (ELOVL1, zgc:103538) |         | Danio rerio (Zebrafish)<br>(Brachydanio rerio).                       | AAH83417.1,<br>CAN88635.1 | NP_001005989.1                 | Q5XJ87 [T] |     |
| Eukaryota | Elongation of very long chain fatty acids protein 1                                                                                     |         | Osmerus mordax (Rainbow<br>smelt) (Atherina mordax).                  | ACO09366.1                |                                | C1BK13 [T] |     |
| Eukaryota | elongation of very long chain fatty acids (FEN1/Elo2, SUR4/Elo3, yeast)-like 1                                                          |         | Homo sapiens                                                          | EAX07100.1                |                                |            |     |
| Eukaryota | Elovl1-prov protein                                                                                                                     |         | Xenopus laevis (African<br>clawed frog).                              | AAH42304.1                | NP_001080371.1                 | Q8AVG1 [T] |     |
| Eukaryota | MGC64517 protein                                                                                                                        |         | Xenopus laevis (African<br>clawed frog).                              | AAH54983.1                | NP_001079820.1                 | Q7SY74 [T] |     |
| Eukaryota | Elongation of very long chain fatty acids (FEN1/Elo2, SUR4/Elo3, yeast)-like 1                                                          |         | Xenopus tropicalis<br>(Western clawed frog)<br>(Silurana tropicalis). | CAJ82993.1                | NP_001016644.1                 | Q28IHO [T] |     |

|           |                                                                       |  |                                                                 |                                                                                                     |                                   |                         |  |
|-----------|-----------------------------------------------------------------------|--|-----------------------------------------------------------------|-----------------------------------------------------------------------------------------------------|-----------------------------------|-------------------------|--|
| Eukaryota | Elovl7a protein                                                       |  | Danio rerio (Zebrafish) (Brachydanio rerio).                    | AAI55282.1                                                                                          |                                   | A9JTC1 [T]              |  |
| Eukaryota | Novel protein similar to vertebrate ELOVL family member (Zgc:55879)   |  | Danio rerio (Zebrafish) (Brachydanio rerio).                    | CAP19505.1                                                                                          |                                   | A9C3R2                  |  |
| Eukaryota | ELOVL family member 7, elongation of long chain fatty acids (Yeast) a |  | Danio rerio (Zebrafish) (Brachydanio rerio).                    | AAH45481.1                                                                                          | NP_956169.1                       | Q7ZVN0 [T]              |  |
| Eukaryota | PREDICTED: similar to LOC398440 protein                               |  | Taeniopygia guttata                                             |                                                                                                     | XP_002188325.1                    |                         |  |
| Eukaryota | PREDICTED: similar to LOC398440 protein                               |  | Gallus gallus                                                   |                                                                                                     | XP_429134.2                       |                         |  |
| Eukaryota | ELOVL family member 7, elongation of long chain fatty acids (Yeast) b |  | Danio rerio (Zebrafish) (Brachydanio rerio).                    | AAH51608.1                                                                                          | NP_956072.1                       | Q7ZTU5 [T]              |  |
| Eukaryota | MGC80262 protein                                                      |  | Xenopus laevis (African clawed frog).                           | AAH72173.1                                                                                          | NP_001085206.1                    | Q6INU9 [T]              |  |
| Eukaryota | ELOVL family member 7, elongation of long chain fatty acids           |  | Xenopus tropicalis (Western clawed frog) (Silurana tropicalis). | AAH74576.1                                                                                          | NP_001005456.1                    | Q6GLC3 [T]              |  |
| Eukaryota | PREDICTED: hypothetical protein                                       |  | Monodelphis domestica                                           |                                                                                                     | XP_001381271.1                    |                         |  |
| Eukaryota | Elongation of very long chain fatty acids protein 7                   |  | Bos taurus (Bovine).                                            | AAI26612.1                                                                                          | NP_001071510.1                    | A0JNC4 [T],<br>A0JNC4.1 |  |
| Eukaryota | elongation of very long chain fatty acids protein 7                   |  | Bos taurus                                                      | DAA17940.1<br>AAH05602.1,<br>BAB31310.1,<br>BAC29727.1,<br>BAC33552.1,<br>BAE23454.1,<br>EDL18446.1 |                                   |                         |  |
| Eukaryota | Elongation of very long chain fatty acids protein 7                   |  | Mus musculus (Mouse).                                           |                                                                                                     | NP_083277.3                       | Q9D2Y9 [T],<br>Q9D2Y9.1 |  |
| Eukaryota | Putative uncharacterized protein Elovl7                               |  | Rattus norvegicus (Rat).                                        |                                                                                                     | NP_001178773.1,<br>XP_001065454.1 | D4ADY9                  |  |

|           |                                                                                             |  |                                       |                                                            |                             |                      |
|-----------|---------------------------------------------------------------------------------------------|--|---------------------------------------|------------------------------------------------------------|-----------------------------|----------------------|
| Eukaryota | PREDICTED: elongation of very long chain fatty acids-like 7                                 |  | Oryctolagus cuniculus                 |                                                            | XP_002714040.1              |                      |
| Eukaryota | Putative uncharacterized protein                                                            |  | Ailuropoda melanoleuca (Giant panda). | EFB24434.1                                                 |                             | D2H3V0               |
| Eukaryota | PREDICTED: similar to ELOVL family member 7, elongation of long chain fatty acids           |  | Canis familiaris                      |                                                            | XP_851268.1                 |                      |
| Eukaryota | PREDICTED: similar to elongation of very long chain fatty acids-like 7                      |  | Equus caballus                        |                                                            | XP_001494543.1              |                      |
| Eukaryota | PREDICTED: elongation of very long chain fatty acids protein 7-like                         |  | Callithrix jacchus                    |                                                            | XP_002745002.1              |                      |
| Eukaryota | PREDICTED: similar to ELOVL family member 7, elongation of long chain fatty acids isoform 1 |  | Pan troglodytes                       |                                                            | XP_001137116.1              |                      |
| Eukaryota | PREDICTED: ELOVL family member 7, elongation of long chain fatty acids isoform 2            |  | Pan troglodytes                       |                                                            | XP_001137205.1              |                      |
| Eukaryota | PREDICTED: LOW QUALITY PROTEIN: elongation of very long chain fatty acids protein 7-like    |  | Pongo abelii                          |                                                            | XP_002815632.1              |                      |
| Eukaryota | Elongation of very long chain fatty acids protein 7                                         |  | Homo sapiens (Human).                 | AAI30311.1, AAI30313.1, BAB15697.1, BAD93238.1, CAB70777.1 | NP_001098028.1, NP_079206.2 | A1L3X0 [T], A1L3X0.1 |
| Eukaryota | ELOVL family member 7, elongation of long chain fatty acids (yeast), isoform CRA_a          |  | Homo sapiens                          | EAW55001.1                                                 |                             |                      |
| Eukaryota | SJCHGC06698 protein                                                                         |  | Schistosoma japonicum (Blood fluke).  | AAW25886.1, CAX69919.1, CAX82879.1                         |                             | Q5DE70 [T]           |
| Eukaryota | Elongation of very long chain fatty acids protein 1                                         |  | Schistosoma japonicum                 | CAX69918.1                                                 |                             |                      |
| Eukaryota | Elongation of fatty acids protein 1                                                         |  | Schistosoma mansoni (Blood fluke).    | CAZ28764.1                                                 | XP_002572532.1              | C4PZV5               |



|           |                                     |  |                                                 |            |                |            |  |
|-----------|-------------------------------------|--|-------------------------------------------------|------------|----------------|------------|--|
| Eukaryota | Fatty acid acyl transferase-related |  | Schistosoma mansoni<br>(Blood fluke).           | CAZ28765.1 | XP_002572533.1 | C4PZV6     |  |
| Eukaryota | Zgc:153394                          |  | Danio rerio (Zebrafish)<br>(Brachydanio rerio). | AAI24344.1 | NP_001070061.1 | Q08C82 [T] |  |

## KS5-SubD

| Type      | Sequence                                                    | EC Number | Organism                                              | GenBank ID | RefSeq         | UniProt    | PDB |
|-----------|-------------------------------------------------------------|-----------|-------------------------------------------------------|------------|----------------|------------|-----|
| Eukaryota | elongation of very long chain fatty acids protein, putative |           | Pediculus humanus corporis USDA                       | EEB10552.1 | XP_002423290.1 |            |     |
| Eukaryota | GA18780                                                     |           | Drosophila pseudoobscura pseudoobscura (Fruit fly).   | EAL26993.1 | XP_001357858.1 | Q29BK5     |     |
| Eukaryota | GF16146                                                     |           | Drosophila ananassae (Fruit fly).                     | EDV44191.1 | XP_001955630.1 | B3M001     |     |
| Eukaryota | GM23637                                                     |           | Drosophila sechellia (Fruit fly).                     | EDW43208.1 | XP_002032222.1 | B4HEP7     |     |
| Eukaryota | GD18447                                                     |           | Drosophila simulans (Fruit fly).                      | EDX13946.1 | XP_002104443.1 | B4ROM3     |     |
| Eukaryota | GG12505                                                     |           | Drosophila erecta (Fruit fly).                        | EDV54128.1 | XP_001982258.1 | B3P8N3     |     |
| Eukaryota | GE24026                                                     |           | Drosophila yakuba (Fruit fly).                        | EDW98021.1 | XP_002098309.1 | B4PMB6     |     |
| Eukaryota | CG5278                                                      |           | Drosophila melanogaster (Fruit fly).                  | AAF56019.1 | NP_651063.1    | Q9VCY6 [P] |     |
| Eukaryota | GK14432                                                     |           | Drosophila willistoni (Fruit fly).                    | EDW85036.1 | XP_002074050.1 | B4NJS4     |     |
| Eukaryota | GH19244                                                     |           | Drosophila grimshawi (Fruit fly) (Idiomya grimshawi). | EDV93327.1 | XP_001990265.1 | B4JF46     |     |
| Eukaryota | GJ23058                                                     |           | Drosophila virilis (Fruit fly).                       | EDW67476.1 | XP_002053956.1 | B4M165     |     |
| Eukaryota | GI24279                                                     |           | Drosophila mojavensis (Fruit fly).                    | EDW14471.1 | XP_001999010.1 | B4K958     |     |

|           |                                          |  |                                                                        |                                          |                |            |  |
|-----------|------------------------------------------|--|------------------------------------------------------------------------|------------------------------------------|----------------|------------|--|
| Eukaryota | Elongase, putative                       |  | <i>Aedes aegypti</i> (Yellowfever mosquito) ( <i>Culex aegypti</i> ).  | EAT46133.1                               | XP_001662066.1 | Q17HH4     |  |
| Eukaryota | AGAP008780-PA                            |  | <i>Anopheles gambiae</i> (African malaria mosquito).                   | EAA10106.4                               | XP_314908.3    | Q7PPN4     |  |
| Eukaryota | PREDICTED: similar to elongase, putative |  | <i>Nasonia vitripennis</i>                                             |                                          | XP_001599914.1 |            |  |
| Eukaryota | PREDICTED: similar to CG5278-PA          |  | <i>Apis mellifera</i>                                                  |                                          | XP_624324.2    |            |  |
| Eukaryota | GA18806                                  |  | <i>Drosophila pseudoobscura pseudoobscura</i> (Fruit fly).             | EAL26994.1                               | XP_001357859.1 | Q29BK2     |  |
| Eukaryota | GF16148                                  |  | <i>Drosophila ananassae</i> (Fruit fly).                               | EDV44188.1                               | XP_001955627.1 | B3LZZ8     |  |
| Eukaryota | GH17398                                  |  | <i>Drosophila grimshawi</i> (Fruit fly) ( <i>Idiomyia grimshawi</i> ). | EDV91362.1                               | XP_001994733.1 | B4JV42     |  |
| Eukaryota | RH69239p                                 |  | <i>Drosophila melanogaster</i> (Fruit fly).                            | AAF56015.1,<br>AAL25486.1,<br>AAN71629.1 | NP_651060.1    | Q9VCZ0 [T] |  |
| Eukaryota | GG12507                                  |  | <i>Drosophila erecta</i> (Fruit fly).                                  | EDV54131.1                               | XP_001982261.1 | B3P8N6     |  |
| Eukaryota | GI22725                                  |  | <i>Drosophila mojavensis</i> (Fruit fly).                              | EDW15549.1                               | XP_002000088.1 | B4K9B7     |  |
| Eukaryota | GK14434                                  |  | <i>Drosophila willistoni</i> (Fruit fly).                              | EDW85039.1                               | XP_002074053.1 | B4NJS7     |  |
| Eukaryota | GJ24664                                  |  | <i>Drosophila virilis</i> (Fruit fly).                                 | EDW68362.1                               | XP_002054842.1 | B4M0I3     |  |
| Eukaryota | Elongase, putative                       |  | <i>Aedes aegypti</i> (Yellowfever mosquito) ( <i>Culex aegypti</i> ).  | EAT35432.1                               | XP_001662545.1 | Q16M71     |  |

|           |                                                                           |  |                                                                                   |            |                |        |  |
|-----------|---------------------------------------------------------------------------|--|-----------------------------------------------------------------------------------|------------|----------------|--------|--|
| Eukaryota | Elongase, putative                                                        |  | <i>Aedes aegypti</i> (Yellowfever mosquito) ( <i>Culex aegypti</i> ).             | EAT33534.1 | XP_001648181.1 | Q16H16 |  |
| Eukaryota | AGAP011812-PA                                                             |  | <i>Anopheles gambiae</i> (African malaria mosquito).                              | EAA00350.4 | XP_320705.4    | Q7PZA2 |  |
| Eukaryota | PREDICTED: similar to CG5326-PA, isoform A                                |  | <i>Apis mellifera</i>                                                             |            | XP_001120442.1 |        |  |
| Eukaryota | PREDICTED: similar to AGAP011812-PA, partial                              |  | <i>Tribolium castaneum</i>                                                        |            | XP_967207.2    |        |  |
| Eukaryota | Putative uncharacterized protein                                          |  | <i>Tribolium castaneum</i> (Red flour beetle).                                    | EFA10641.1 |                | D6X2U7 |  |
| Eukaryota | PREDICTED: similar to GA18806-PA                                          |  | <i>Nasonia vitripennis</i>                                                        |            | XP_001599838.1 |        |  |
| Eukaryota | Elongation of very long chain fatty acids protein 2                       |  | <i>Culex quinquefasciatus</i> (Southern house mosquito) ( <i>Culex pungens</i> ). | EDS29827.1 | XP_001843008.1 | BOW2S4 |  |
| Eukaryota | AGAP007134-PA                                                             |  | <i>Anopheles gambiae</i> (African malaria mosquito).                              | EAA04155.4 | XP_308627.4    | Q7QIY7 |  |
| Eukaryota | Elongation of very long chain fatty acids protein 4                       |  | <i>Culex quinquefasciatus</i> (Southern house mosquito) ( <i>Culex pungens</i> ). | EDS40638.1 | XP_001845514.1 | BOW9Y0 |  |
| Eukaryota | Elongase, putative                                                        |  | <i>Aedes aegypti</i> (Yellowfever mosquito) ( <i>Culex aegypti</i> ).             | EAT45640.1 | XP_001663163.1 | Q17GE6 |  |
| Eukaryota | PREDICTED: similar to elongation of very long chain fatty acids protein 4 |  | <i>Tribolium castaneum</i>                                                        |            | XP_968636.1    |        |  |
| Eukaryota | PREDICTED: similar to CG31522 CG31522-PA                                  |  | <i>Acyrtosiphon pisum</i>                                                         |            | XP_001950768.1 |        |  |
| Eukaryota | PREDICTED: similar to CG31522-PB, isoform B                               |  | <i>Apis mellifera</i>                                                             |            | XP_001120770.1 |        |  |

|           |                                     |  |                     |  |                |  |  |
|-----------|-------------------------------------|--|---------------------|--|----------------|--|--|
| Eukaryota | PREDICTED: similar to<br>CG33110-PA |  | Nasonia vitripennis |  | XP_001599942.1 |  |  |
|-----------|-------------------------------------|--|---------------------|--|----------------|--|--|

## KS5-SubE

| Type      | Sequence                                                                           | EC Number | Organism                                                               | GenBank ID | RefSeq         | UniProt    | PDB |
|-----------|------------------------------------------------------------------------------------|-----------|------------------------------------------------------------------------|------------|----------------|------------|-----|
| Eukaryota | elongation of very long chain fatty acids protein, putative                        |           | <i>Pediculus humanus corporis</i> USDA                                 | EEB16888.1 | XP_002429626.1 |            |     |
| Eukaryota | PREDICTED: similar to Elongation of very long chain fatty acids protein AAEL008004 |           | <i>Tribolium castaneum</i>                                             |            | XP_968706.1    |            |     |
| Eukaryota | Elongation of very long chain fatty acids protein AAEL008004                       |           | <i>Lepeophtheirus salmonis</i> (salmon louse).                         | ACO12890.1 |                | C1BV37 [T] |     |
| Eukaryota | Elongation of very long chain fatty acids protein AAEL008004                       |           | <i>Caligus clemensi</i> .                                              | ACO14746.1 |                | C1C0E3 [T] |     |
| Eukaryota | Elongation of very long chain fatty acids protein AAEL008004                       |           | <i>Caligus rogercresseyi</i> .                                         | ACO10630.1 |                | C1BNM7 [T] |     |
| Eukaryota | Similar to CG31523-PA                                                              |           | <i>Papilio xuthus</i> .                                                | BAG30735.1 |                | B2DBH6 [T] |     |
| Eukaryota | GK13749                                                                            |           | <i>Drosophila willistoni</i> (Fruit fly).                              | EDW83699.1 | XP_002072713.1 | B4NIB7     |     |
| Eukaryota | GF18505                                                                            |           | <i>Drosophila ananassae</i> (Fruit fly).                               | EDV43467.1 | XP_001954906.1 | B3M2T7     |     |
| Eukaryota | GH18532                                                                            |           | <i>Drosophila grimshawi</i> (Fruit fly) ( <i>Idiomyia grimshawi</i> ). | EDV92976.1 | XP_001989914.1 | B4JI95     |     |
| Eukaryota | GI22068                                                                            |           | <i>Drosophila mojavensis</i> (Fruit fly).                              | EDW16724.1 | XP_002001263.1 | B4KA49     |     |
| Eukaryota | GJ24117                                                                            |           | <i>Drosophila virilis</i> (Fruit fly).                                 | EDW67386.1 | XP_002053866.1 | B4M0X5     |     |
| Eukaryota | GL22347                                                                            |           | <i>Drosophila persimilis</i> (Fruit fly).                              | EDW34630.1 | XP_002017530.1 | B4GDW9     |     |
| Eukaryota | GA16298                                                                            |           | <i>Drosophila pseudoobscura pseudoobscura</i> (Fruit fly).             | EAL28742.1 | XP_001359592.1 | Q295H0     |     |
| Eukaryota | GE25346                                                                            |           | <i>Drosophila yakuba</i> (Fruit fly).                                  | EDW95669.1 | XP_002095957.1 | B4PTT6     |     |

|           |                                                                                    |  |                                                |                                                                        |                                                             |            |  |
|-----------|------------------------------------------------------------------------------------|--|------------------------------------------------|------------------------------------------------------------------------|-------------------------------------------------------------|------------|--|
| Eukaryota | GD19675                                                                            |  | <i>Drosophila simulans</i> (Fruit fly).        | EDX11613.1                                                             | XP_002102110.1                                              | B4QVI8     |  |
| Eukaryota | GH09808p                                                                           |  | <i>Drosophila melanogaster</i> (Fruit fly).    | AAL25306.1,<br>AAN13323.1,<br>AAN13324.1,<br>AAN13325.1,<br>AAN13326.2 | NP_649474.1,<br>NP_730846.1,<br>NP_730847.1,<br>NP_730848.2 | Q95T98 [P] |  |
| Eukaryota | GG11532                                                                            |  | <i>Drosophila erecta</i> (Fruit fly).          | EDV47789.1                                                             | XP_001978831.1                                              | B3P216     |  |
| Eukaryota | GM10700                                                                            |  | <i>Drosophila sechellia</i> (Fruit fly).       | EDW54839.1                                                             | XP_002038302.1                                              | B4I3P6     |  |
| Eukaryota | PREDICTED: similar to CG31523 CG31523-PA                                           |  | <i>Acyrtosiphon pisum</i>                      |                                                                        | XP_001952817.1                                              |            |  |
| Eukaryota | PREDICTED: similar to CG31523-PA, isoform A                                        |  | <i>Apis mellifera</i>                          |                                                                        | XP_397228.2                                                 |            |  |
| Eukaryota | PREDICTED: similar to elongase, putative                                           |  | <i>Nasonia vitripennis</i>                     |                                                                        | XP_001600017.1                                              |            |  |
| Eukaryota | Putative uncharacterized protein                                                   |  | <i>Tribolium castaneum</i> (Red flour beetle). | EFA09796.1                                                             | XP_971544.1                                                 | D6X365     |  |
| Eukaryota | Putative uncharacterized protein                                                   |  | <i>Tribolium castaneum</i> (Red flour beetle). | EFA09795.1                                                             | XP_971599.1                                                 | D6X366     |  |
| Eukaryota | elongation of very long chain fatty acids protein, putative                        |  | <i>Pediculus humanus corporis</i> USDA         | EEB19473.1                                                             | XP_002432211.1                                              |            |  |
| Eukaryota | PREDICTED: similar to CG31522-PA, isoform A, partial                               |  | <i>Apis mellifera</i>                          |                                                                        | XP_623221.1                                                 |            |  |
| Eukaryota | PREDICTED: similar to Elongation of very long chain fatty acids protein AAEL008004 |  | <i>Acyrtosiphon pisum</i>                      |                                                                        | XP_001943200.1                                              |            |  |
| Eukaryota | Putative uncharacterized protein                                                   |  | <i>Tribolium castaneum</i> (Red flour beetle). | EFA09483.1                                                             | XP_968784.1                                                 | D6X1G2     |  |
| Eukaryota | GH22993p                                                                           |  | <i>Drosophila melanogaster</i> (Fruit fly).    | AAN13319.2,<br>AAN13320.2,<br>AAO25056.1                               | NP_730841.2,<br>NP_730842.2                                 | Q8IPL8 [T] |  |

|           |                                                                |          |                                                                           |                           |                                   |            |  |
|-----------|----------------------------------------------------------------|----------|---------------------------------------------------------------------------|---------------------------|-----------------------------------|------------|--|
| Eukaryota | GK13751                                                        |          | <i>Drosophila willistoni</i> (Fruit fly).                                 | EDW83701.1                | XP_002072715.1                    | B4NIB9     |  |
| Eukaryota | LD14383p                                                       |          | <i>Drosophila melanogaster</i> (Fruit fly).                               | AAF52122.3,<br>AAX33543.1 | NP_730843.2                       | Q9VN29 [T] |  |
| Eukaryota | GE25348                                                        |          | <i>Drosophila yakuba</i> (Fruit fly).                                     | EDW95666.1                | XP_002095954.1                    | B4PTT3     |  |
| Eukaryota | GH18533                                                        |          | <i>Drosophila grimshawi</i> (Fruit fly)<br>( <i>Idiomyia grimshawi</i> ). | EDV92975.1                | XP_001989913.1                    | B4JI94     |  |
| Eukaryota | GI22070                                                        |          | <i>Drosophila mojavensis</i> (Fruit fly).                                 | EDW16723.1                | XP_002001262.1                    | B4KA48     |  |
| Eukaryota | elongation of very long chain fatty acids protein,<br>putative |          | <i>Pediculus humanus corporis</i> USDA                                    | EEB19470.1                | XP_002432208.1                    |            |  |
| Eukaryota | PREDICTED: similar to CG31522-PB, isoform B                    |          | <i>Apis mellifera</i>                                                     |                           | XP_393136.2                       |            |  |
| Eukaryota | PREDICTED: similar to CG31522-PA                               |          | <i>Nasonia vitripennis</i>                                                |                           | XP_001599996.1                    |            |  |
| Eukaryota | GH18531                                                        |          | <i>Drosophila grimshawi</i> (Fruit fly)<br>( <i>Idiomyia grimshawi</i> ). | EDV92977.1                | XP_001989915.1                    | B4JI96     |  |
| Eukaryota | GI22067                                                        |          | <i>Drosophila mojavensis</i> (Fruit fly).                                 | EDW16725.1                | XP_002001264.1                    | B4KA50     |  |
| Eukaryota | GJ24115                                                        |          | <i>Drosophila virilis</i> (Fruit fly).                                    | EDW67384.1                | XP_002053864.1                    | B4M0X3     |  |
| Eukaryota | RH49985p                                                       |          | <i>Drosophila melanogaster</i> (Fruit fly).                               | AAM51033.1                |                                   | Q8MS02 [T] |  |
| Eukaryota | GE25754                                                        |          | <i>Drosophila yakuba</i> (Fruit fly).                                     | EDW96310.1,<br>EDX00181.1 | XP_002086779.1,<br>XP_002096598.1 | B4IUW7     |  |
| Eukaryota | GD19443                                                        |          | <i>Drosophila simulans</i> (Fruit fly).                                   | EDX12048.1                | XP_002102545.1                    | B4ROC3     |  |
| Eukaryota | CG2781                                                         | 2.4.1.34 | <i>Drosophila melanogaster</i> (Fruit fly).                               | AAF54172.2                | NP_649754.1                       | Q9VHX7 [T] |  |



|           |         |  |                                                                      |            |                |        |  |
|-----------|---------|--|----------------------------------------------------------------------|------------|----------------|--------|--|
| Eukaryota | GG24795 |  | <i>Drosophila erecta</i> (Fruit fly).                                | EDV48203.1 | XP_001979245.1 | B3NYU0 |  |
| Eukaryota | GM10441 |  | <i>Drosophila sechellia</i> (Fruit fly).                             | EDW55290.1 | XP_002038753.1 | B4I4Z7 |  |
| Eukaryota | GK13951 |  | <i>Drosophila willistoni</i> (Fruit fly).                            | EDW84092.1 | XP_002073106.1 | B4NKN1 |  |
| Eukaryota | GF16560 |  | <i>Drosophila ananassae</i> (Fruit fly).                             | EDV43365.1 | XP_001954804.1 | B3M241 |  |
| Eukaryota | GL23546 |  | <i>Drosophila persimilis</i> (Fruit fly).                            | EDW24136.1 | XP_002013150.1 | B4G2U1 |  |
| Eukaryota | GA15460 |  | <i>Drosophila pseudoobscura</i><br><i>pseudoobscura</i> (Fruit fly). | EAL28161.2 | XP_001359018.2 | Q297P4 |  |

## KS5-SubF

| Type      | Sequence                                                                                                         | EC Number | Organism                                            | GenBank ID                                              | RefSeq         | UniProt    | PDB |
|-----------|------------------------------------------------------------------------------------------------------------------|-----------|-----------------------------------------------------|---------------------------------------------------------|----------------|------------|-----|
| Eukaryota | PREDICTED: similar to elongation of very long chain fatty acids (FEN1/Elo2, SUR4/Elo3, yeast)-like 4 (predicted) |           | Hydra magnipapillata                                |                                                         | XP_002158269.1 |            |     |
| Eukaryota | PREDICTED: similar to elongation of very long chain fatty acids (FEN1/Elo2, SUR4/Elo3, yeast)-like 4 (predicted) |           | Hydra magnipapillata                                |                                                         | XP_002160705.1 |            |     |
| Eukaryota | GF10549                                                                                                          |           | Drosophila ananassae (Fruit fly).                   | EDV40517.1                                              | XP_001957711.1 | B3M4U3     |     |
| Eukaryota | GA23552                                                                                                          |           | Drosophila pseudoobscura pseudoobscura (Fruit fly). | EDY73516.1                                              | XP_002134889.1 | B5DPB4     |     |
| Eukaryota | GL24915                                                                                                          |           | Drosophila persimilis (Fruit fly).                  | EDW40393.1                                              | XP_002021237.1 | B4GRK8     |     |
| Eukaryota | GK12306                                                                                                          |           | Drosophila willistoni (Fruit fly).                  | EDW79983.1                                              | XP_002068997.1 | B4N6J4     |     |
| Eukaryota | GD12826                                                                                                          |           | Drosophila simulans (Fruit fly).                    | EDX10036.1                                              | XP_002084451.1 | B4QPP5     |     |
| Eukaryota | GM24775                                                                                                          |           | Drosophila sechellia (Fruit fly).                   | EDW41050.1                                              | XP_002030064.1 | B4HDW0     |     |
| Eukaryota | IP08602p                                                                                                         |           | Drosophila melanogaster (Fruit fly).                | AANT1899.2,<br>AAY55350.1,<br>AAY55470.1,<br>CAI40769.1 | NP_729666.2    | Q5JZZ4 [T] |     |
| Eukaryota | Elongase 68beta, isoform B                                                                                       |           | Drosophila melanogaster (Fruit fly).                | ABW08521.1                                              | NP_001097580.1 | A8JNR0     |     |
| Eukaryota | GM24776                                                                                                          |           | Drosophila sechellia (Fruit fly).                   | EDW41049.1                                              | XP_002030063.1 | B4HDV9     |     |
| Eukaryota | GD12827                                                                                                          |           | Drosophila simulans (Fruit fly).                    | EDX10035.1                                              | XP_002084450.1 | B4QPP4     |     |
| Eukaryota | GE20239                                                                                                          |           | Drosophila yakuba (Fruit fly).                      | EDW94080.1                                              | XP_002094368.1 | B4PEL4     |     |
| Eukaryota | GG13940                                                                                                          |           | Drosophila erecta (Fruit fly).                      | EDV51369.1                                              | XP_001972343.1 | B3NCS2     |     |

|           |                                                                                                      |  |                                                                   |            |                |            |  |
|-----------|------------------------------------------------------------------------------------------------------|--|-------------------------------------------------------------------|------------|----------------|------------|--|
| Eukaryota | PREDICTED: elongation of very long chain fatty acids-like 4-like, partial                            |  | Saccoglossus kowalevskii                                          |            | XP_002733844.1 |            |  |
| Eukaryota | Elongase, putative                                                                                   |  | Aedes aegypti (Yellowfever mosquito) (Culex aegypti).             | EAT44716.1 | XP_001648136.1 | Q17E22     |  |
| Eukaryota | Elongation of very long chain fatty acids protein 4                                                  |  | Culex quinquefasciatus (Southern house mosquito) (Culex pungens). | EDS35408.1 | XP_001861291.1 | B0WV69     |  |
| Eukaryota | elongation of very long chain fatty acids protein, putative                                          |  | Pediculus humanus corporis USDA                                   | EEB16673.1 | XP_002429411.1 |            |  |
| Eukaryota | Putative uncharacterized protein                                                                     |  | Tribolium castaneum (Red flour beetle).                           | EEZ97311.1 | XP_966527.1    | D6X467     |  |
| Eukaryota | PREDICTED: similar to ENSANGP00000016884                                                             |  | Nasonia vitripennis                                               |            | XP_001600743.1 |            |  |
| Eukaryota | PREDICTED: similar to elongation of very long chain fatty acids (FEN1/Elo2, SUR4/Elo3, yeast)-like 4 |  | Apis mellifera                                                    |            | XP_395160.2    |            |  |
| Eukaryota | Putative uncharacterized protein                                                                     |  | Branchiostoma floridae (Florida lancelet) (Amphioxus).            | EEN64591.1 | XP_002608581.1 | C3Y558     |  |
| Eukaryota | Zgc:73341                                                                                            |  | Danio rerio (Zebrafish) (Brachydanio rerio).                      | AAH59658.1 | NP_957090.1    | Q6PBM2 [T] |  |
| Eukaryota | PREDICTED: elongation of very long chain fatty acids-like 4-like                                     |  | Danio rerio                                                       |            | XP_002664825.1 |            |  |
| Eukaryota | Very long-chain fatty acids elongase-like 4 protein                                                  |  | Rachycentron canadum (cobia).                                     | ADG59898.1 |                | D6QZA6 [T] |  |
| Eukaryota | Chromosome 14 SCAF14660, whole genome shotgun sequence.                                              |  | Tetraodon nigroviridis (Green puffer).                            | CAG01780.1 |                | Q4SC52     |  |
| Eukaryota | Elongation of very long chain fatty acids (FEN1/Elo2, SUR4/Elo3, yeast)-like 4                       |  | Danio rerio (Zebrafish) (Brachydanio rerio).                      | AAH60897.1 | NP_956266.1    | Q6P978 [T] |  |
| Eukaryota | Elov14 protein                                                                                       |  | Danio rerio (Zebrafish) (Brachydanio rerio).                      | AAI52204.1 |                | A7MCJ3 [T] |  |
| Eukaryota | elongation of very long chain fatty acids-like 4                                                     |  | Salmo salar                                                       | ADJ95235.1 | NP_001182481.1 |            |  |
| Eukaryota | PREDICTED: elongation of very long chain fatty acids (FEN1/Elo2, SUR4/Elo3, yeast)-like 4            |  | Taeniopygia guttata                                               |            | XP_002188735.1 |            |  |

|           |                                                                                                      |  |                                       |                                                                        |                                   |                                        |  |
|-----------|------------------------------------------------------------------------------------------------------|--|---------------------------------------|------------------------------------------------------------------------|-----------------------------------|----------------------------------------|--|
| Eukaryota | PREDICTED: hypothetical protein                                                                      |  | Gallus gallus                         |                                                                        | XP_419868.2                       |                                        |  |
| Eukaryota | PREDICTED: similar to ELOVL4                                                                         |  | Ornithorhynchus anatinus              |                                                                        | XP_001512185.1                    |                                        |  |
| Eukaryota | PREDICTED: hypothetical protein                                                                      |  | Monodelphis domestica                 |                                                                        | XP_001366145.1                    |                                        |  |
| Eukaryota | PREDICTED: similar to elongation of very long chain fatty acids-like 4                               |  | Equus caballus                        |                                                                        | XP_001503697.1                    |                                        |  |
| Eukaryota | ELOVL4 protein                                                                                       |  | Bos taurus (Bovine).                  | AAI42460.1,<br>DAA26375.1                                              | NP_001092520.1                    | A5PKE6 [T]                             |  |
| Eukaryota | PREDICTED: similar to elongation of very long chain fatty acids-like 4                               |  | Sus scrofa                            |                                                                        | XP_001925804.1                    |                                        |  |
| Eukaryota | PREDICTED: elongation of very long chain fatty acids protein 4-like                                  |  | Callithrix jacchus                    |                                                                        | XP_002746802.1                    |                                        |  |
| Eukaryota | PREDICTED: similar to elongation of very long chain fatty acids (FEN1/Elo2, SUR4/Elo3, yeast)-like 4 |  | Canis familiaris                      |                                                                        | XP_539015.1                       |                                        |  |
| Eukaryota | Putative uncharacterized protein                                                                     |  | Ailuropoda melanoleuca (Giant panda). | EFB14596.1                                                             | XP_002916342.1                    | D2H3V6                                 |  |
| Eukaryota | Putative uncharacterized protein Elovl4                                                              |  | Rattus norvegicus (Rat).              | EDL77659.1                                                             | NP_001178725.1,<br>XP_001062735.1 | D4ACH5                                 |  |
| Eukaryota | Putative uncharacterized protein                                                                     |  | Mus musculus (Mouse).                 | AAG47667.1,<br>AAH37030.1,<br>BAC26274.1,<br>CAD80158.4,<br>EDL26470.1 | NP_001139446.1,<br>NP_683743.2    | Q8JZV3 [T],<br>Q9EQC4 [T],<br>Q9EQC4.1 |  |
| Eukaryota | Elongation of very long chain fatty acids protein 4                                                  |  | Macaca mulatta (Rhesus macaque).      | AAZ95094.1                                                             | NP_001035509.1                    | Q3S8M4                                 |  |
| Eukaryota | PREDICTED: elongation of very long chain fatty acids-like 4                                          |  | Oryctolagus cuniculus                 |                                                                        | XP_002714591.1                    |                                        |  |
| Eukaryota | PREDICTED: LOW QUALITY PROTEIN: elongation of very long chain fatty acids protein 4-like             |  | Pongo abelii                          |                                                                        | XP_002817130.1                    |                                        |  |
| Eukaryota | PREDICTED: elongation of very long chain fatty acids (FEN1/Elo2, SUR4/Elo3, yeast)-like 4            |  | Pan troglodytes                       |                                                                        | XP_518601.2                       |                                        |  |

|           |                                                     |  |                       |                                                                                                                                    |             |                         |
|-----------|-----------------------------------------------------|--|-----------------------|------------------------------------------------------------------------------------------------------------------------------------|-------------|-------------------------|
| Eukaryota | Elongation of very long chain fatty acids protein 4 |  | Homo sapiens (Human). | AAG47668.1,<br>AAG47669.1,<br>AAH38506.1,<br>AAK68639.1,<br>BAB70895.1,<br>BAG35412.1,<br>CAI20320.1,<br>CAI23374.1,<br>EAW48701.1 | NP_073563.1 | Q9GZR5 [T],<br>Q9GZR5.1 |
|-----------|-----------------------------------------------------|--|-----------------------|------------------------------------------------------------------------------------------------------------------------------------|-------------|-------------------------|

## KS5-SubG

| Type      | Sequence                                                                                             | EC Number | Organism                                                        | GenBank ID                               | RefSeq         | UniProt                 | PDB |
|-----------|------------------------------------------------------------------------------------------------------|-----------|-----------------------------------------------------------------|------------------------------------------|----------------|-------------------------|-----|
| Eukaryota | PREDICTED: similar to predicted protein                                                              |           | Hydra magnipapillata                                            |                                          | XP_002155036.1 |                         |     |
| Eukaryota | PREDICTED: similar to predicted protein, partial                                                     |           | Hydra magnipapillata                                            |                                          | XP_002154976.1 |                         |     |
| Eukaryota | PREDICTED: similar to CG31522 CG31522-PB, partial                                                    |           | Hydra magnipapillata                                            |                                          | XP_002160924.1 |                         |     |
| Eukaryota | Predicted protein                                                                                    |           | Nematostella vectensis (Starlet sea anemone).                   | EDO48664.1                               | XP_001640727.1 | A7RI99                  |     |
| Eukaryota | Putative uncharacterized protein                                                                     |           | Branchiostoma floridae (Florida lancelet) (Amphioxus).          | EEN41768.1                               | XP_002585757.1 | C4A0A9                  |     |
| Eukaryota | Polyunsaturated fatty acid elongase elv15                                                            |           | Gadus morhua (Atlantic cod).                                    | AAT81406.1,<br>ADA70325.1                |                | Q68YU1 [T]              |     |
| Eukaryota | Polyunsaturated fatty acid elongase                                                                  |           | Danio rerio (Zebrafish) (Brachydanio rerio).                    | AAH55137.1,<br>AAN77156.2,<br>CAX14512.1 | NP_956747.1    | Q8AX86 [T]              |     |
| Eukaryota | Fatty acid elongase                                                                                  |           | Clarias gariepinus (Sharptooth catfish) (African catfish).      | AAT81405.1                               |                | Q68YU2 [T]              |     |
| Eukaryota | Elongation of very long chain fatty acids protein 5                                                  |           | Xenopus tropicalis (Western clawed frog) (Silurana tropicalis). | AAH87826.1                               | NP_001011248.1 | Q5M8U1 [T],<br>Q5M8U1.1 |     |
| Eukaryota | MGC114802 protein                                                                                    |           | Xenopus laevis (African clawed frog).                           | AAI00191.1                               | NP_001089650.1 | Q498J8 [T]              |     |
| Eukaryota | Elongation of very long chain fatty acids protein 5                                                  |           | Xenopus laevis (African clawed frog).                           | AAI08604.1                               | NP_001089883.1 | Q32NI8 [T],<br>Q32NI8.1 |     |
| Eukaryota | PREDICTED: similar to elongation of very long chain fatty acids-like 2                               |           | Taeniopygia guttata                                             |                                          | XP_002195568.1 |                         |     |
| Eukaryota | Elongation of very long chain fatty acids-like 2 protein                                             |           | Meleagris gallopavo (Common turkey).                            | ADD65339.1                               |                | D4N2R0                  |     |
| Eukaryota | PREDICTED: similar to Elongation of very long chain fatty acids (FEN1/Elo2, SUR4/Elo3, yeast)-like 2 |           | Gallus gallus                                                   |                                          | XP_426204.2    |                         |     |
| Eukaryota | PREDICTED: similar to Elongation of very long chain fatty acids (FEN1/Elo2, SUR4/Elo3, yeast)-like 2 |           | Ornithorhynchus anatinus                                        |                                          | XP_001511544.1 |                         |     |

|           |                                                                                                                 |  |                                                                |                                                                                                                                                                                                |                |                         |
|-----------|-----------------------------------------------------------------------------------------------------------------|--|----------------------------------------------------------------|------------------------------------------------------------------------------------------------------------------------------------------------------------------------------------------------|----------------|-------------------------|
| Eukaryota | PREDICTED: hypothetical protein                                                                                 |  | Monodelphis domestica                                          |                                                                                                                                                                                                | XP_001364339.1 |                         |
| Eukaryota | PREDICTED: similar to fatty acid elongase 1                                                                     |  | Equus caballus                                                 |                                                                                                                                                                                                | XP_001499220.2 |                         |
| Eukaryota | Fatty acid elongase 1                                                                                           |  | Rattus norvegicus (Rat).                                       | BAB69887.1                                                                                                                                                                                     | NP_599209.1    | Q920L7 [T],<br>Q920L7.1 |
| Eukaryota | Elongation of very long chain fatty acids protein 5                                                             |  | Mus musculus (Mouse).                                          | AA012511.1,<br>BAC26105.1,<br>BAC32290.1,<br>BAC34682.1,<br>BAC39499.1,<br>BAC39509.1,<br>BAC40176.1,<br>BAE36925.1,<br>BAE40787.1,<br>EDL26357.1                                              | NP_599016.2    | Q8BHI7 [P],<br>Q8BHI7.1 |
| Eukaryota | PREDICTED: elongation of very long chain fatty acids protein 5-like isoform 2                                   |  | Callithrix jacchus                                             |                                                                                                                                                                                                | XP_002746702.1 |                         |
| Eukaryota | Elongation of very long chain fatty acids protein 5                                                             |  | Pongo abelii (Sumatran orangutan).                             | CAH89442.1                                                                                                                                                                                     | NP_001127147.1 | Q5RFL5 [T],<br>Q5RFL5.1 |
| Eukaryota | Elongation of very long chain fatty acids protein 5                                                             |  | Macaca fascicularis (Crab eating macaque) (Cynomolgus monkey). | BAE01809.1                                                                                                                                                                                     |                | Q4R516 [T],<br>Q4R516.1 |
| Eukaryota | cDNA FLJ52813, highly similar to Homo sapiens ELOVL family member 5, elongation of long chain fatty acids, mRNA |  | Homo sapiens (Human).                                          | BAG64104.1                                                                                                                                                                                     |                | B4DZJ2 [T]              |
| Eukaryota | Fatty acid elongase 1                                                                                           |  | Homo sapiens (Human).                                          | AAF70631.1,<br>AAH17270.2,<br>AAH67123.2,<br>AAM00193.1,<br>BAC11178.1,<br>BAC11270.1,<br>BAD93035.1,<br>CAB66873.1,<br>CAI21530.1,<br>EAX04416.1,<br>EAX04418.1,<br>EAX04421.1,<br>EAX04422.1 | NP_068586.1    | Q9NYP7 [P],<br>Q9NYP7.1 |
| Eukaryota | PREDICTED: homolog of yeast long chain polyunsaturated fatty acid elongation                                    |  | Pan troglodytes                                                |                                                                                                                                                                                                | XP_527417.2    |                         |

|           |                                                                                                                                         |  |                                                                        |                           |                |                         |
|-----------|-----------------------------------------------------------------------------------------------------------------------------------------|--|------------------------------------------------------------------------|---------------------------|----------------|-------------------------|
| Eukaryota | cDNA FLJ43108 fis, clone CTONG2021289, highly similar to Homo sapiens ELOVL family member 5, elongation of long chain fatty acids, mRNA |  | Homo sapiens (Human).                                                  | BAG54141.1                |                | B3KWH9 [T]              |
| Eukaryota | PREDICTED: elongation of very long chain fatty acids-like 5                                                                             |  | Oryctolagus cuniculus                                                  |                           | XP_002714555.1 |                         |
| Eukaryota | PREDICTED: similar to homolog of yeast long chain polyunsaturated fatty acid elongation                                                 |  | Canis familiaris                                                       |                           | XP_852962.1    |                         |
| Eukaryota | Elongase                                                                                                                                |  | Sus scrofa (Pig).                                                      | ACE80202.2                |                | B3VHV3 [T]              |
| Eukaryota | Elongation of very long chain fatty acids protein 5                                                                                     |  | Bos taurus (Bovine).                                                   | AAI05392.1,<br>DAA16564.1 | NP_001040062.1 | Q2KJD9 [T],<br>Q2KJD9.1 |
| Eukaryota | ELOVL family member 5                                                                                                                   |  | Capra hircus (Goat).                                                   | BAF49682.1                |                | A4PBF5 [T]              |
| Eukaryota | Fatty acid elongase                                                                                                                     |  | Anguilla japonica (Japanese eel).                                      | ACI32414.1                |                | D3TJK6 [T]              |
| Eukaryota | Fatty acid elongase                                                                                                                     |  | Siniperca chuatsi (Chinese perch).                                     | ACH53603.1                |                | D3TJH7 [T]              |
| Eukaryota | Putative polyunsaturated fatty acid elongase                                                                                            |  | Oreochromis niloticus (Nile tilapia) (Tilapia nilotica).               | AAO13174.2                |                | Q8AWE8 [T]              |
| Eukaryota | Polyunsaturated fatty acid elongase elov15b                                                                                             |  | Salmo salar (Atlantic salmon).                                         | ACI62499.1                | NP_001130024.1 | B6V6V0 [T]              |
| Eukaryota | Polyunsaturated fatty acid elongase elov15a                                                                                             |  | Salmo salar (Atlantic salmon).                                         | AAO13175.2,<br>ADA70324.1 | NP_001117039.1 | Q8AWE7 [T]              |
| Eukaryota | Putative polyunsaturated fatty acid elongase                                                                                            |  | Oncorhynchus masou (Cherry salmon) (Masu salmon).                      | AAY79352.1                |                | Q4PLF1 [T]              |
| Eukaryota | Polyunsaturated fatty acid elongase                                                                                                     |  | Oncorhynchus mykiss (Rainbow trout) (Salmo gairdneri).                 | AAV67803.1                | NP_001118108.1 | Q5SE05 [T]              |
| Eukaryota | Fatty acid elongase                                                                                                                     |  | Epinephelus coioides (Orange-spotted grouper) (Epinephelus nebulosus). | ACJ26847.1                |                | D3TJK3 [T]              |
| Eukaryota | Polyunsaturated fatty acid elongase                                                                                                     |  | Psetta maxima (Turbot) (Pleuronectes maximus).                         | AAL69984.2                |                | Q8UVB9 [T]              |
| Eukaryota | Fatty acid elongase                                                                                                                     |  | Sparus aurata (Gilthead sea bream).                                    | AAT81404.1                |                | Q68YU3 [T]              |



|           |                                                                                                      |  |                                                                 |                           |                |            |  |
|-----------|------------------------------------------------------------------------------------------------------|--|-----------------------------------------------------------------|---------------------------|----------------|------------|--|
| Eukaryota | Polyunsaturated fatty acid elongase                                                                  |  | Nibe mitsukurii (Nibe croaker).                                 | ACR47973.1                |                | C5ILA7 [T] |  |
| Eukaryota | Fatty acyl elongase                                                                                  |  | Thunnus maccoyii (southern bluefin tuna).                       | ACZ55930.1                |                | D2IFF5 [T] |  |
| Eukaryota | Putative fatty acyl elongase                                                                         |  | Thunnus maccoyii (southern bluefin tuna).                       | ACH86120.1                |                | B5U1I5 [T] |  |
| Eukaryota | Fatty acyl elovl5 elongase                                                                           |  | Lates calcarifer (Barramundi).                                  | ACS91459.1,<br>ACY25090.1 |                | D0U1T1 [T] |  |
| Eukaryota | Polyunsaturated fatty acid elongase                                                                  |  | Rachycentron canadum (cobia).                                   | ACJ65150.1                |                | B7U6V2 [T] |  |
| Eukaryota | PREDICTED: similar to MGC84669 protein                                                               |  | Gallus gallus                                                   |                           | XP_418947.2    |            |  |
| Eukaryota | Putative elongation of very long chain fatty acids-like 2 variant 1                                  |  | Taeniopygia guttata (Zebra finch) (Poephila guttata).           | ACH46005.1                |                | B5G3Z4 [T] |  |
| Eukaryota | Putative elongation of very long chain fatty acids-like 2 variant 1                                  |  | Taeniopygia guttata (Zebra finch) (Poephila guttata).           | ACH46004.1                |                | B5G3Z3 [T] |  |
| Eukaryota | PREDICTED: elongation of very long chain fatty acids-like 2                                          |  | Taeniopygia guttata                                             |                           | XP_002186815.1 |            |  |
| Eukaryota | MGC84669 protein                                                                                     |  | Xenopus laevis (African clawed frog).                           | AAH80108.1                | NP_001087564.1 | Q68EU2 [T] |  |
| Eukaryota | Elongation of very long chain fatty acids (FEN1/Elo2, SUR4/Elo3, yeast)-like 2                       |  | Xenopus tropicalis (Western clawed frog) (Silurana tropicalis). | AAI35163.1,<br>CAJ83102.1 | NP_001016159.1 | Q28FK3 [T] |  |
| Eukaryota | PREDICTED: similar to Elongation of very long chain fatty acids (FEN1/Elo2, SUR4/Elo3, yeast)-like 2 |  | Monodelphis domestica                                           |                           | XP_001377373.1 |            |  |
| Eukaryota | Elongation of very long chain fatty acids-like 2                                                     |  | Bos taurus                                                      | DAA16044.1                |                |            |  |
| Eukaryota | ELOVL2 protein                                                                                       |  | Bos taurus (Bovine).                                            | AAI14787.1                | NP_001076986.1 | A4FUF2 [T] |  |
| Eukaryota | PREDICTED: similar to elongation of very long chain fatty acids-like 2                               |  | Sus scrofa                                                      |                           | XP_001924876.1 |            |  |
| Eukaryota | PREDICTED: similar to elongation of very long chain fatty acids-like 2                               |  | Sus scrofa                                                      |                           | XP_001924743.1 |            |  |

|           |                                                                                                      |  |                                              |                                                                                                      |                |                                        |  |
|-----------|------------------------------------------------------------------------------------------------------|--|----------------------------------------------|------------------------------------------------------------------------------------------------------|----------------|----------------------------------------|--|
| Eukaryota | Putative uncharacterized protein Elovl2                                                              |  | Rattus norvegicus (Rat).                     | EDL98219.1,<br>EDL98220.1                                                                            | NP_001102588.1 | D4A612                                 |  |
| Eukaryota | Elongation of very long chain fatty acids (FEN1/Elo2, SUR4/Elo3, yeast)-like 2, isoform CRA_a        |  | Mus musculus mixed                           | EDL40970.1                                                                                           |                |                                        |  |
| Eukaryota | Elongation of very long chain fatty acids protein 2                                                  |  | Mus musculus (Mouse).                        | AAF72573.1,<br>AAH98215.1,<br>BAB29559.1,<br>BAC26646.1,<br>BAC32079.1,<br>BAC34236.1,<br>EDL40971.1 | NP_062296.1    | Q543J1 [T],<br>Q9JLJ4 [T],<br>Q9JLJ4.1 |  |
| Eukaryota | PREDICTED: elongation of very long chain fatty acids-like 2                                          |  | Oryctolagus cuniculus                        |                                                                                                      | XP_002714222.1 |                                        |  |
| Eukaryota | Elongation of very long chain fatty acids protein 2                                                  |  | Homo sapiens (Human).                        | AAH50278.2,<br>AAH60809.1,<br>BAA91096.1,<br>CAI22076.1,<br>EAW55291.1,<br>EAW55292.1                | NP_060240.3    | Q9NXB9 [T],<br>Q9NXB9.2                |  |
| Eukaryota | PREDICTED: elongation of very long chain fatty acids protein 2-like                                  |  | Callithrix jacchus                           |                                                                                                      | XP_002746274.1 |                                        |  |
| Eukaryota | PREDICTED: elongation of very long chain fatty acids protein 2                                       |  | Macaca mulatta                               |                                                                                                      | XP_001091337.1 |                                        |  |
| Eukaryota | elongation of very long chain fatty acids (FEN1/Elo2, SUR4/Elo3, yeast)-like 2, isoform CRA_a        |  | Homo sapiens                                 | EAW55290.1                                                                                           |                |                                        |  |
| Eukaryota | PREDICTED: similar to elongation of very long chain fatty acids (FEN1/Elo2, SUR4/Elo3, yeast)-like 2 |  | Canis familiaris                             |                                                                                                      | XP_545341.2    |                                        |  |
| Eukaryota | Putative uncharacterized protein                                                                     |  | Ailuropoda melanoleuca (Giant panda).        | EFB16677.1                                                                                           |                | D2H2W1                                 |  |
| Eukaryota | Polyunsaturated fatty acid elongase elov12                                                           |  | Salmo salar (Atlantic salmon).               | ACI62500.1                                                                                           | NP_001130025.1 | B6V6V1 [T]                             |  |
| Eukaryota | Elongation of very long chain fatty acids (FEN1/Elo2, SUR4/Elo3, yeast)-like 2                       |  | Danio rerio (Zebrafish) (Brachydanio rerio). | AAI15093.1                                                                                           | NP_001035452.1 | Q1RM84 [T]                             |  |
| Eukaryota | Elovl2 protein                                                                                       |  | Danio rerio (Zebrafish) (Brachydanio rerio). | AAI34116.1                                                                                           |                | A3KP14 [T]                             |  |
| Eukaryota | Elovl2 protein                                                                                       |  | Danio rerio (Zebrafish) (Brachydanio rerio). | AAH95785.1                                                                                           |                | Q502A7 [T]                             |  |

|           |                |  |                                              |            |  |            |
|-----------|----------------|--|----------------------------------------------|------------|--|------------|
| Eukaryota | Elovl2 protein |  | Danio rerio (Zebrafish) (Brachydanio rerio). | AAI29269.1 |  | A1L1Y7 [T] |
|-----------|----------------|--|----------------------------------------------|------------|--|------------|

## KS5-SubH

| Type      | Sequence                                                | EC Number | Organism                                | GenBank ID                               | RefSeq         | UniProt               | PDB |
|-----------|---------------------------------------------------------|-----------|-----------------------------------------|------------------------------------------|----------------|-----------------------|-----|
| Eukaryota | Polyunsaturated fatty acids delta-5-elongase            |           | Thraustochytrium sp. FJN-10.            | ABC18313.1                               |                | Q2PWB8 [T]            |     |
| Eukaryota | Delta-6 polyunsaturated fatty acid elongase             |           | Parietochloris incisa.                  | ACK99719.1                               |                | B8YJJ0 [T]            |     |
| Eukaryota | Fatty acid elongase                                     | 2.3.1.119 | Parietochloris incisa.                  | ACO71191.1                               |                | C1KKV1                |     |
| Eukaryota | Polyunsaturated fatty acids elongase                    |           | Parietochloris incisa.                  | ACF60496.1                               |                | B5AFK8 [T]            |     |
| Eukaryota | Delta-6 elongase                                        |           | Pyramimonas cordata.                    | ACR53359.1                               |                | D7NLL0 [T]            |     |
| Eukaryota | Polyunsaturated fatty acid elongase 1 (ISS)             |           | Ostreococcus tauri.                     | AAV67797.1,<br>CAL52008.1                |                | Q5SE78                |     |
| Eukaryota | Predicted protein                                       |           | Micromonas pusilla<br>CCMP1545.         | EEH55768.1                               | XP_003059816.1 | C1MNV4                |     |
| Eukaryota | Polyunsaturated fatty acid elongase                     |           | Marchantia polymorpha<br>(Liverwort).   | AAT85662.1                               |                | Q696V7                |     |
| Eukaryota | Polyunsaturated fatty acid specific elongation enzyme 1 |           | Physcomitrella patens (Moss).           | AAL84174.1,<br>BAE71131.1,<br>EDQ54842.1 | XP_001780388.1 | A9TP48,<br>Q8S4Q5 [T] |     |
| Eukaryota | Delta5-elongase                                         |           | Marchantia polymorpha<br>(Liverwort).   | BAE71129.1,<br>BAE71130.1                |                | Q2PEN5 [T]            |     |
| Eukaryota | Predicted protein                                       |           | Physcomitrella patens subsp.<br>patens. | EDQ56051.1                               | XP_001779105.1 | A9TKH5                |     |
| Eukaryota | Predicted protein                                       |           | Physcomitrella patens subsp.<br>patens. | EDQ58622.1                               | XP_001776634.1 | A9TDC6                |     |

|           |                                                                      |  |                                                             |                           |                |            |  |
|-----------|----------------------------------------------------------------------|--|-------------------------------------------------------------|---------------------------|----------------|------------|--|
| Eukaryota | Long chain polyunsaturated fatty acid elongation enzyme-like protein |  | <i>Leishmania braziliensis</i> .                            | CAM42926.1                | XP_001567488.1 | A4HKA3     |  |
| Eukaryota | Long chain polyunsaturated fatty acid elongation enzyme-like protein |  | <i>Leishmania infantum</i> .                                | CAM70869.1                | XP_001467802.1 | A4I7T3     |  |
| Eukaryota | Long chain polyunsaturated fatty acid elongation enzyme-like protein |  | <i>Leishmania major</i> .                                   | CAJ08636.1                | XP_001685432.1 | Q4Q5G6     |  |
| Eukaryota | Delta-6 elongase                                                     |  | <i>Mortierella alpina</i> ( <i>Mortierella renispora</i> ). | ADE06662.1                |                | D5KSD4 [T] |  |
| Eukaryota | Long chain polyunsaturated fatty acid elongation enzyme              |  | <i>Mortierella alpina</i> ( <i>Mortierella renispora</i> ). | AAF70417.1                |                | Q9P4D7 [T] |  |
| Eukaryota | Polyunsaturated fatty acid elongation enzyme                         |  | <i>Mortierella alpina</i> ( <i>Mortierella renispora</i> ). | ACD31685.1,<br>BAF97073.1 |                | A9ZLZ4 [T] |  |
| Eukaryota | Fatty acid elongase                                                  |  | <i>Ectocarpus siliculosus</i> (Brown alga).                 | CBJ26568.1                |                | D7FYS6     |  |
| Eukaryota | Delta-6-elongase                                                     |  | <i>Phaeodactylum tricornutum</i> .                          | ABQ18315.1                |                | A5HML5     |  |
| Eukaryota | Polyunsaturated fatty acid elongase 1                                |  | <i>Thalassiosira pseudonana</i> (Marine diatom).            | AAV67799.1                |                | Q5SE76     |  |
| Eukaryota | Probable microsomal very long chain fatty acid elongase              |  | <i>Thalassiosira pseudonana</i> (Marine diatom).            | EED93917.1                | XP_002288481.1 | B8BYM9     |  |

## KS5-SubI

| Type      | Sequence                                                          | EC Number | Organism                                                                                        | GenBank ID                | RefSeq                      | UniProt | PDB |
|-----------|-------------------------------------------------------------------|-----------|-------------------------------------------------------------------------------------------------|---------------------------|-----------------------------|---------|-----|
| Eukaryota | Putative uncharacterized protein                                  |           | <i>Aspergillus flavus</i> (strain ATCC 200026 / FGSC A1120 / NRRL 3357 / JCM 12722 / SRRC 167). | EED52530.1                | XP_002377694.1              | B8NAK7  |     |
| Eukaryota | Fatty acid elongase                                               |           | <i>Mortierella alpina</i> ( <i>Mortierella renispora</i> ).                                     | BAI40363.1                |                             | C8KHM6  |     |
| Eukaryota | Putative uncharacterized protein                                  |           | <i>Candida tropicalis</i> (strain ATCC MYA-3404 / T1) (Yeast).                                  | EER33690.1                | XP_002548211.1              | C5M7Y6  |     |
| Eukaryota | Potential fatty acid elongase                                     |           | <i>Candida albicans</i> (Yeast).                                                                | EAL04355.1,<br>EAL04510.1 | XP_723068.1,<br>XP_723215.1 | Q5AN96  |     |
| Eukaryota | Putative uncharacterized protein                                  |           | <i>Candida albicans</i> (Yeast).                                                                | EEQ44568.1                |                             | C4YNQ9  |     |
| Eukaryota | Elongation of fatty acids protein, putative                       |           | <i>Candida dubliniensis</i> (strain CD36 / CBS 7987 / NCPF 3949 / NRRL Y-17841) (Yeast).        | CAX43027.1                | XP_002419433.1              | B9WEB6  |     |
| Eukaryota | Whole genome shotgun sequence assembly, scaffold_50, strain Mel28 |           | <i>Tuber melanosporum</i> (Perigord truffle).                                                   | CAZ84657.1                | XP_002840466.1              | D5GJG4  |     |
| Eukaryota | Predicted CDS Pa_7_6910                                           |           | <i>Podospora anserina</i> .                                                                     | CAP68722.1                | XP_001908049.1              | B2AWE8  |     |
| Eukaryota | Whole genome shotgun sequence assembly, scaffold_29               |           | <i>Sordaria macrospora</i> .                                                                    | CBI55186.1                |                             | D1ZG36  |     |
| Eukaryota | Putative uncharacterized protein                                  |           | <i>Neurospora crassa</i> .                                                                      | EAA29768.1                | XP_959004.1                 | Q7S2Z3  |     |

## KS5-SubJ

| Type      | Sequence                                     | EC Number | Organism                                                                                                   | GenBank ID                | RefSeq                      | UniProt                    | PDB |
|-----------|----------------------------------------------|-----------|------------------------------------------------------------------------------------------------------------|---------------------------|-----------------------------|----------------------------|-----|
| Eukaryota | unnamed protein product                      |           | Blastocystis hominis                                                                                       | CBK22771.2                |                             |                            |     |
| Eukaryota | Putative uncharacterized protein             |           | Malassezia globosa (strain ATCC 96807 / CBS 7966) (Dandruff-associated fungus).                            | EDP42299.1                | XP_001729513.1              | A8Q9S0                     |     |
| Eukaryota | Putative elongation of fatty acids protein 2 |           | Schizosaccharomyces pombe (Fission yeast).                                                                 | CAB55288.2                | NP_592859.2                 | Q7LKX0,<br>Q7LKX0.2        |     |
| Eukaryota | Elongation of fatty acids protein            |           | Schizosaccharomyces japonicus (strain yFS275 / FY16936) (Fission yeast).                                   | EEB07778.1                | XP_002174071.1              | B6K1F7                     |     |
| Eukaryota | Putative uncharacterized protein             |           | Ustilago maydis (Smut fungus).                                                                             | EAK85103.1                | XP_760105.1                 | Q4P7F5                     |     |
| Eukaryota | Putative uncharacterized protein             |           | Cryptococcus neoformans (Filobasidiella neoformans).                                                       | AAW42062.1,<br>EAL21675.1 | XP_569369.1,<br>XP_776322.1 | Q5KLB1                     |     |
| Eukaryota | hypothetical protein                         |           | Schizophyllum commune H4-8                                                                                 | EFJ03723.1                | XP_003038625.1              |                            |     |
| Eukaryota | Fatty acid elongase                          |           | Coprinopsis cinerea (strain Okayama-7 / 130 / FGSC 9003) (Inky cap fungus) (Hormographiella aspergillata). | EAU93111.2                | XP_001828716.2              | A8N1G7                     |     |
| Eukaryota | Elongase of fatty acids, ELO                 |           | Laccaria bicolor (strain S238N-H82) (Bicoloured deceiver) (Laccaria laccata var. bicolor).                 | EDR14987.1                | XP_001873195.1              | B0CPT7                     |     |
| Eukaryota | Elongation of fatty acids protein            |           | Schizosaccharomyces japonicus (strain yFS275 / FY16936) (Fission yeast).                                   | EEB06313.1                | XP_002172606.1              | B6K0G3                     |     |
| Eukaryota | Putative elongation of fatty acids protein 1 |           | Schizosaccharomyces pombe (Fission yeast).                                                                 | CAB61470.1                | NP_593930.1                 | Q9UTF7<br>[P],<br>Q9UTF7.1 |     |
| Eukaryota | Fatty acid elongase isoform II               |           | Mucor rouxii.                                                                                              | ACJ23176.1                |                             | C6F130                     |     |
| Eukaryota | Fatty acid elongase                          |           | Mortierella alpina (Mortierella renispora).                                                                | BAH02594.1                |                             | B6ZK38                     |     |
| Eukaryota | Long chain fatty acid elongation enzyme      |           | Mortierella alpina (Mortierella renispora).                                                                | AAF71789.1                |                             | Q9P8G1<br>[T]              |     |

|           |                                                                  |  |                                                                                                         |                                          |                                   |                                       |
|-----------|------------------------------------------------------------------|--|---------------------------------------------------------------------------------------------------------|------------------------------------------|-----------------------------------|---------------------------------------|
| Eukaryota | Fatty acid elongase isoform I                                    |  | Mucor rouxii.                                                                                           | ACJ23175.1                               |                                   | C6F129                                |
| Eukaryota | YJL196Cp-like protein                                            |  | Saccharomyces cerevisiae (strain AWRI1631) (Baker's yeast).                                             | EDZ71398.1                               |                                   | B5VKZ6                                |
| Eukaryota | Elongase                                                         |  | Saccharomyces cerevisiae (strain RM11-1a) (Baker's yeast).                                              | EDN63193.1,<br>EDV12585.1                |                                   | A6ZQE1,<br>B3LPT2                     |
| Eukaryota | Elo1p                                                            |  | Saccharomyces cerevisiae (strain Lalvin EC1118 / Prise de mousse) Baker's yeast).                       | CAA54764.1,<br>CAA89491.1,<br>CAY80591.2 | NP_012339.1                       | C8ZB25,<br>P39540<br>[P],<br>P39540.1 |
| Eukaryota | Elo1p                                                            |  | Saccharomyces cerevisiae (strain JAY291) (Baker's yeast).                                               | EEU06413.1                               |                                   | C7GS17                                |
| Eukaryota | Elongation of fatty acids protein, putative                      |  | Penicillium marneffeii (strain ATCC 18224 / CBS 334.59 / QM 7333).                                      | EEA26663.1                               | XP_002143178.1                    | B6Q7C1                                |
| Eukaryota | Elongation of fatty acids protein, putative                      |  | Talaromyces stipitatus (strain ATCC 10500 / CBS 375.48 / QM 6759 / NRRL 1006) (Penicillium stipitatum). | EED19044.1,<br>EED19045.1                | XP_002479478.1,<br>XP_002479479.1 | B8M644                                |
| Eukaryota | Putative fatty acid elongase protein                             |  | Aureobasidium pullulans.                                                                                | ABL63519.2                               |                                   | A1ED48                                |
| Eukaryota | YALIOB20196p                                                     |  | Yarrowia lipolytica (Candida lipolytica).                                                               | CAG83378.1                               | XP_501125.1                       | Q6CDY7                                |
| Eukaryota | Putative uncharacterized protein                                 |  | Sclerotinia sclerotiorum (strain ATCC 18683 / 1980 / Ss-1) (White mold) (Whetzelinia sclerotiorum).     | EDN99048.1                               | XP_001585048.1                    | A7F8H7                                |
| Eukaryota | Putative uncharacterized protein                                 |  | Botryotinia fuckeliana (strain B05.10) (Noble rot fungus) (Botrytis cinerea).                           | EDN18918.1                               | XP_001548467.1                    | A6SJT3                                |
| Eukaryota | Putative uncharacterized protein                                 |  | Aspergillus nidulans FGSC A4.                                                                           |                                          | XP_664039.1                       | C8V0F1                                |
| Eukaryota | Elongation of fatty acids protein, putative                      |  | Talaromyces stipitatus (strain ATCC 10500 / CBS 375.48 / QM 6759 / NRRL 1006) (Penicillium stipitatum). | EED15705.1                               | XP_002485658.1                    | B8MJ43                                |
| Eukaryota | Elongation of fatty acids protein 3                              |  | Pyrenophora tritici-repentis (strain Pt-1C-BFP) (Wheat tan spot fungus) (Drechslera tritici-repentis).  | EDU43942.1                               | XP_001941223.1                    | B2WLN2                                |
| Eukaryota | Whole genome shotgun sequence assembly, scaffold_1, strain Mel28 |  | Tuber melanosporum (Perigord truffle).                                                                  | CAZ79212.1                               | XP_002835091.1                    | D5G3W9                                |



|           |                                                                               |  |                                                                                                     |                        |                |        |  |
|-----------|-------------------------------------------------------------------------------|--|-----------------------------------------------------------------------------------------------------|------------------------|----------------|--------|--|
| Eukaryota | Putative fatty acid elongase A                                                |  | Hortaea werneckii.                                                                                  | ACF19588.1             |                | B3LEU1 |  |
| Eukaryota | Pc21g18830 protein                                                            |  | Penicillium chrysogenum (strain ATCC 28089 / DSM 1075 / Wisconsin 54-1255) (Penicillium notatum).   | CAP96780.1             | XP_002568874.1 | B6HI82 |  |
| Eukaryota | Elongation of fatty acids protein, putative                                   |  | Aspergillus flavus (strain ATCC 200026 / FGSC A1120 / NRRL 3357 / JCM 12722 / SRRC 167).            | EED55977.1             | XP_002374759.1 | B8N1U5 |  |
| Eukaryota | Fatty acyl-CoA elongase/Polyunsaturated fatty acid specific elongation enzyme |  | Aspergillus oryzae.                                                                                 | BAE57737.1             | XP_001819739.1 | Q2UL28 |  |
| Eukaryota | hypothetical protein MGG_07280                                                |  | Magnaporthe oryzae 70-15                                                                            |                        | XP_367355.1    |        |  |
| Eukaryota | hypothetical protein FG07347.1                                                |  | Gibberella zeae PH-1                                                                                |                        | XP_387523.1    |        |  |
| Eukaryota | Predicted protein                                                             |  | Nectria haematococca (strain 77-13-4 / FGSC 9596 / MPVI) (Fusarium solani subsp. pisi).             | EEU44339.1             | XP_003050052.1 | C7YU27 |  |
| Eukaryota | Predicted CDS Pa_2_11530                                                      |  | Podospora anserina.                                                                                 | CAP73794.1             | XP_001911966.1 | B2B7L6 |  |
| Eukaryota | Putative uncharacterized protein                                              |  | Chaetomium globosum (Soil fungus).                                                                  | EAQ86504.1             | XP_001225413.1 | Q2GW97 |  |
| Eukaryota | Whole genome shotgun sequence assembly, scaffold_64                           |  | Sordaria macrospora.                                                                                | CBI57612.1             |                | D1ZNH8 |  |
| Eukaryota | Probable fatty acid elongase (FEN1)                                           |  | Neurospora crassa.                                                                                  | CAD70918.1, EAA31773.1 | XP_961009.1    | Q871S5 |  |
| Eukaryota | Putative uncharacterized protein                                              |  | Sclerotinia sclerotiorum (strain ATCC 18683 / 1980 / Ss-1) (White mold) (Whetzelinia sclerotiorum). | EDN96471.1             | XP_001597203.1 | A7E7W9 |  |
| Eukaryota | Elongation of fatty acids protein 3                                           |  | Nannizzia otae (strain CBS 113480) (Microsporum canis) (Arthroderma otae).                          | EEQ28868.1             | XP_002848753.1 | C5FHN8 |  |
| Eukaryota | Putative uncharacterized protein                                              |  | Trichophyton verrucosum (strain HKI 0517).                                                          | EFE41259.1             | XP_003021877.1 | D4DAA8 |  |
| Eukaryota | Putative uncharacterized protein                                              |  | Arthroderma benhamiae (strain CBS 112371) (Trichophyton mentagrophytes).                            | EFE34314.1             | XP_003014954.1 | D4ARH1 |  |

|           |                                                                               |  |                                                                                                                           |            |                |        |  |
|-----------|-------------------------------------------------------------------------------|--|---------------------------------------------------------------------------------------------------------------------------|------------|----------------|--------|--|
| Eukaryota | hypothetical protein CIMG_06474                                               |  | Coccidioides immitis RS                                                                                                   |            | XP_001242578.1 |        |  |
| Eukaryota | Elongation of fatty acids protein 2 , putative                                |  | Coccidioides posadasii (strain C735) (Valley fever fungus).                                                               | EER27629.1 | XP_003069774.1 | C5P4I9 |  |
| Eukaryota | Elongation of fatty acids protein 2                                           |  | Uncinocarpus reesii (strain UAMH 1704).                                                                                   | EEP79098.1 | XP_002544427.1 | C4JM86 |  |
| Eukaryota | Elongation of fatty acids protein                                             |  | Paracoccidioides brasiliensis (strain Pb03).                                                                              | EEH23225.1 |                | C0SCN1 |  |
| Eukaryota | Elongation of fatty acids protein                                             |  | Paracoccidioides brasiliensis (strain Pb18).                                                                              | EEH49672.1 |                | C1GER5 |  |
| Eukaryota | Elongation of fatty acids protein                                             |  | Paracoccidioides brasiliensis (strain ATCC MYA-826 / Pb01).                                                               | EEH36829.1 | XP_002790710.1 | C1H906 |  |
| Eukaryota | V-SNARE                                                                       |  | Ajellomyces capsulata (strain ATCC 26029 / G186AR / H82 / RMSCC 2432) Darling's disease fungus) (Histoplasma capsulatum). | EEH05298.1 |                | C0NTD7 |  |
| Eukaryota | Fatty acid elongase                                                           |  | Ajellomyces dermatitidis (strain ER-3) (Blastomyces dermatitidis).                                                        | EEQ89366.1 |                | C5GIA9 |  |
| Eukaryota | Fatty acid elongase                                                           |  | Ajellomyces dermatitidis (strain SLH14081) (Blastomyces dermatitidis).                                                    | EEQ73235.1 | XP_002628557.1 | C5JFN4 |  |
| Eukaryota | Fatty acid elongase (Gns1), putative                                          |  | Talaromyces stipitatus (strain ATCC 10500 / CBS 375.48 / QM 6759 / NRRL 1006) (Penicillium stipitatum).                   | EED17748.1 | XP_002481740.1 | B8MAQ8 |  |
| Eukaryota | Fatty acid elongase (Gns1), putative                                          |  | Penicillium marneffeii (strain ATCC 18224 / CBS 334.59 / QM 7333).                                                        | EEA24074.1 | XP_002147585.1 | B6QF39 |  |
| Eukaryota | Putative uncharacterized protein                                              |  | Aspergillus nidulans FGSC A4.                                                                                             |            | XP_681386.1    | C8V6M8 |  |
| Eukaryota | Putative uncharacterized protein                                              |  | Aspergillus terreus (strain NIH 2624 / FGSC A1156).                                                                       | EAU30381.1 | XP_001217866.1 | Q0CAP0 |  |
| Eukaryota | Fatty acyl-CoA elongase/Polyunsaturated fatty acid specific elongation enzyme |  | Aspergillus oryzae.                                                                                                       | BAE61449.1 | XP_001822582.1 | Q2UAG6 |  |
| Eukaryota | Remark: FEN1 S. cerevisiae is involved in the synthesis of 1                  |  | Aspergillus niger (strain CBS 513.88 / FGSC A1513).                                                                       | CAK37859.1 | XP_001400119.1 | A2QE98 |  |

|           |                                                                                  |  |                                                                                                          |                                                                                                                     |                |                                                                        |  |
|-----------|----------------------------------------------------------------------------------|--|----------------------------------------------------------------------------------------------------------|---------------------------------------------------------------------------------------------------------------------|----------------|------------------------------------------------------------------------|--|
| Eukaryota | Fatty acid elongase (Gns1), putative                                             |  | Aspergillus clavatus.                                                                                    | EAW14829.1                                                                                                          | XP_001276255.1 | A1C561                                                                 |  |
| Eukaryota | Fatty acid elongase (Gns1), putative                                             |  | Aspergillus fumigatus (Sartorya fumigata).                                                               | EAL86028.1,<br>EDP51127.1                                                                                           | XP_748066.1    | B0Y2F7,<br>Q4WEE9                                                      |  |
| Eukaryota | Fatty acid elongase (Gns1), putative                                             |  | Neosartorya fischeri (strain ATCC 1020 / DSM 3700 / FGSC A1164 / NRRL 181) (Aspergillus fischerianus).   | EAW24358.1                                                                                                          | XP_001266255.1 | A1D038                                                                 |  |
| Eukaryota | Putative uncharacterized protein                                                 |  | Vanderwaltozyma polyspora (strain ATCC 22028 / DSM 70294) Kluyveromyces polysporus).                     | EDO18980.1                                                                                                          | XP_001646838.1 | A7TFG6                                                                 |  |
| Eukaryota | Similar to uniprotIP25358 Saccharomyces cerevisiae YCR034w V-SNARE bypass mutant |  | Candida glabrata (Yeast) (Torulopsis glabrata).                                                          | CAG61210.1                                                                                                          | XP_448249.1    | Q6FNE5                                                                 |  |
| Eukaryota | Putative uncharacterized protein                                                 |  | Vanderwaltozyma polyspora (strain ATCC 22028 / DSM 70294) Kluyveromyces polysporus).                     | EDO18546.1                                                                                                          | XP_001646404.1 | A7TGT3                                                                 |  |
| Eukaryota | ZYRO0C17842p                                                                     |  | Zygosaccharomyces rouxii (strain ATCC 2623 / CBS 732 / IFO 1130 / NBRC 1623 / NCYC 568) (Candida mogii). | CAQ43550.1,<br>CAR27480.1                                                                                           | XP_002496413.1 | B2G4P1,<br>C5DUL9                                                      |  |
| Eukaryota | KLTH0F03740p                                                                     |  | Lachancea thermotolerans (strain CBS 6340) (Yeast) (Kluyveromyces thermotolerans).                       | CAR23935.1                                                                                                          | XP_002554372.1 | C5DKD4                                                                 |  |
| Eukaryota | AFR624Wp                                                                         |  | Ashbya gossypii (Yeast) (Eremothecium gossypii).                                                         | AAS53995.1                                                                                                          | NP_986171.1    | Q752F2                                                                 |  |
| Eukaryota | KLLA0C03542p                                                                     |  | Kluyveromyces lactis (Yeast) (Candida sphaerica).                                                        | CAH01205.1                                                                                                          | XP_452354.1    | Q6CUN5                                                                 |  |
| Eukaryota | Fen1p                                                                            |  | Saccharomyces cerevisiae (strain JAY291) (Baker's yeast).                                                | AAB21200.1,<br>AAB87766.1,<br>CAA40226.1,<br>CAA42301.1,<br>EDN62154.1,<br>EDV09734.1,<br>EDZ73515.1,<br>EEU07101.1 | NP_009963.1    | A6ZTL5,<br>B3LUA3,<br>B5VEX8,<br>C7GQ21,<br>P25358<br>[P],<br>P25358.1 |  |
| Eukaryota | Fen1p                                                                            |  | Saccharomyces cerevisiae (strain Lalvin EC1118 / Prise de mousse) Baker's yeast).                        | CAY78240.1                                                                                                          |                | C8Z4C4                                                                 |  |
| Eukaryota | Similar to uniprotIP25358 Saccharomyces cerevisiae YCR034w GNS1                  |  | Candida glabrata (Yeast) (Torulopsis glabrata).                                                          | CAG62102.1                                                                                                          | XP_449132.1    | Q6FKW2                                                                 |  |
| Eukaryota | FEN1                                                                             |  | Kluyveromyces delphensis (Yeast).                                                                        | AAO25600.1                                                                                                          |                | Q874N5                                                                 |  |

|           |                                                                                                                         |  |                                                                                          |                                          |                             |        |
|-----------|-------------------------------------------------------------------------------------------------------------------------|--|------------------------------------------------------------------------------------------|------------------------------------------|-----------------------------|--------|
| Eukaryota | Fatty acid elongase                                                                                                     |  | <i>Pichia angusta</i> (Yeast) ( <i>Hansenula polymorpha</i> ).                           | BAF47261.1                               |                             | A2V729 |
| Eukaryota | Fatty acid elongase                                                                                                     |  | <i>Pichia pastoris</i> (strain GS115) (Yeast).                                           | CAY70649.1                               | XP_002492828.1              | C4R513 |
| Eukaryota | Elongation of fatty acids protein 2                                                                                     |  | <i>Candida tropicalis</i> (strain ATCC MYA-3404 / T1) (Yeast).                           | EER33138.1                               | XP_002549266.1              | C5MBX1 |
| Eukaryota | Fatty acid elongase, putative                                                                                           |  | <i>Candida dubliniensis</i> (strain CD36 / CBS 7987 / NCPF 3949 / NRRL Y-17841) (Yeast). | CAX45552.1                               | XP_002417837.1              | B9W9R7 |
| Eukaryota | Likely fatty acid elongase                                                                                              |  | <i>Candida albicans</i> (Yeast).                                                         | EAK92337.1,<br>EAK92407.1,<br>EEQ41969.1 | XP_711561.1,<br>XP_711629.1 | Q59PF0 |
| Eukaryota | Fatty acyl-CoA elongase/Polyunsaturated fatty acid specific elongation enzyme                                           |  | <i>Pichia stipitis</i> (Yeast).                                                          | EAZ62909.1                               | XP_001386932.1              | A3GI09 |
| Eukaryota | Putative uncharacterized protein                                                                                        |  | <i>Pichia guilliermondii</i> (Yeast) ( <i>Candida guilliermondii</i> ).                  | EDK38670.1                               | XP_001485039.1              | A5DHL7 |
| Eukaryota | Elongation of fatty acids protein 2                                                                                     |  | <i>Lodderomyces elongisporus</i> (Yeast) ( <i>Saccharomyces elongisporus</i> ).          | EDK45395.1                               | XP_001525646.1              | A5E1T7 |
| Eukaryota | DEHA2G10054p                                                                                                            |  | <i>Debaryomyces hansenii</i> (Yeast) ( <i>Torulaspota hansenii</i> ).                    | CAG90454.1                               | XP_461984.1                 | Q6BII7 |
| Eukaryota | Putative uncharacterized protein                                                                                        |  | <i>Clavispora lusitaniae</i> (strain ATCC 42720) (Yeast) ( <i>Candida lusitaniae</i> ).  | EEQ40576.1                               | XP_002615822.1              | C4Y927 |
| Eukaryota | Elongation of fatty acids protein 2                                                                                     |  | <i>Candida tropicalis</i> (strain ATCC MYA-3404 / T1) (Yeast).                           | EER34319.1                               | XP_002546874.1              | C5M5P9 |
| Eukaryota | Likely fatty acid elongase                                                                                              |  | <i>Candida albicans</i> (Yeast).                                                         | EAL02338.1,<br>EEQ45755.1                | XP_721147.1                 | Q5AHL5 |
| Eukaryota | Likely fatty acid elongase                                                                                              |  | <i>Candida albicans</i> (Yeast).                                                         | EAL02212.1                               | XP_721027.1                 | Q5AH88 |
| Eukaryota | Elongation of fatty acids protein 2, putative (Gns1 protein, putative) (V-snare bypass mutant gene 2 protein, putative) |  | <i>Candida dubliniensis</i> (strain CD36 / CBS 7987 / NCPF 3949 / NRRL Y-17841) (Yeast). | CAX43576.1                               | XP_002418276.1              | B9WB06 |
| Eukaryota | Fatty acid elongase                                                                                                     |  | <i>Pichia angusta</i> (Yeast) ( <i>Hansenula polymorpha</i> ).                           | BAD98251.1                               |                             | Q50L63 |

|           |                                              |  |                                                                                                          |                                                                        |                |                              |  |
|-----------|----------------------------------------------|--|----------------------------------------------------------------------------------------------------------|------------------------------------------------------------------------|----------------|------------------------------|--|
| Eukaryota | ZYRO0B07458p                                 |  | Zygosaccharomyces rouxii (strain ATCC 2623 / CBS 732 / IFO 1130 / NBRC 1623 / NCYC 568) (Candida mogii). | CAR26340.1                                                             | XP_002495273.1 | C5DRC9                       |  |
| Eukaryota | Elongase                                     |  | Pichia pastoris (strain GS115) (Yeast).                                                                  | CAY70261.1                                                             | XP_002492452.1 | C4R3Y7                       |  |
| Eukaryota | Putative uncharacterized protein             |  | Clavispora lusitaniae (strain ATCC 42720) (Yeast) (Candida lusitaniae).                                  | EEQ37452.1                                                             | XP_002618116.1 | C4Y043                       |  |
| Eukaryota | Elongation of fatty acids protein 3          |  | Lodderomyces elongisporus (Yeast) (Saccharomyces elongisporus).                                          | EDK43130.1                                                             | XP_001528788.1 | A5DVC2                       |  |
| Eukaryota | Predicted protein                            |  | Pichia stipitis (Yeast).                                                                                 | ABN64295.2                                                             | XP_001382324.2 | A3LNA0                       |  |
| Eukaryota | hypothetical protein PGUG_02923              |  | Meyerozyma guilliermondii ATCC 6260                                                                      |                                                                        | XP_001485194.1 |                              |  |
| Eukaryota | Putative uncharacterized protein             |  | Pichia guilliermondii (Yeast) (Candida guilliermondii).                                                  | EDK38825.2                                                             |                | A5DI22                       |  |
| Eukaryota | DEHA2G05478p                                 |  | Debaryomyces hansenii (Yeast) (Torulaspora hansenii).                                                    | CAG90243.2                                                             | XP_461784.2    | Q6BJ37                       |  |
| Eukaryota | AFR586Wp                                     |  | Ashbya gossypii (Yeast) (Eremothecium gossypii).                                                         | AAS53957.1                                                             | NP_986133.1    | Q752I9                       |  |
| Eukaryota | Putative uncharacterized protein             |  | Vanderwaltozyma polyspora (strain ATCC 22028 / DSM 70294) Kluyveromyces polysporus).                     | EDO15473.1                                                             | XP_001643331.1 | A7TQH2                       |  |
| Eukaryota | Strain CBS138 chromosome G complete sequence |  | Candida glabrata (Yeast) (Torulopsis glabrata).                                                          | CAG59498.1                                                             | XP_446571.1    | Q6FT73                       |  |
| Eukaryota | Sur4p                                        |  | Saccharomyces cerevisiae (strain JAY291) (Baker's yeast).                                                | EEU06458.1                                                             |                | C7GRW5                       |  |
| Eukaryota | v-SNARE bypass mutant gene 1 protein         |  | Saccharomyces cerevisiae (Baker's yeast).                                                                | AAA35134.1, AAB67563.1, AAC28398.1, CAA55129.1, CAA57553.1, EDZ70433.1 | NP_013476.1    | B5VNR0, P40319 [P], P40319.1 |  |
| Eukaryota | Elongase                                     |  | Saccharomyces cerevisiae (strain YJM789) (Baker's yeast).                                                | EDN59277.1                                                             |                | A7A1P9                       |  |

|           |                                     |  |                                                                                    |            |                |        |  |
|-----------|-------------------------------------|--|------------------------------------------------------------------------------------|------------|----------------|--------|--|
| Eukaryota | Sur4p                               |  | Saccharomyces cerevisiae (strain Lalvin EC1118 / Prise de mousse) Baker's yeast).  | CAY81598.1 |                | C8ZDY2 |  |
| Eukaryota | Elongation of fatty acids protein 3 |  | Saccharomyces cerevisiae (strain RM11-1a) (Baker's yeast).                         | EDV08683.1 |                | B3RHN9 |  |
| Eukaryota | KLLA0B07777p                        |  | Kluyveromyces lactis (Yeast) (Candida sphaerica).                                  | CAH02269.1 | XP_451876.1    | Q6CW13 |  |
| Eukaryota | KLTH0D13596p                        |  | Lachancea thermotolerans (strain CBS 6340) (Yeast) (Kluyveromyces thermotolerans). | CAR22863.1 | XP_002553301.1 | C5DFA8 |  |

## KS5-SubK

| Type      | Sequence                                                      | EC Number | Organism                                               | GenBank ID | RefSeq                         | UniProt    | PDB |
|-----------|---------------------------------------------------------------|-----------|--------------------------------------------------------|------------|--------------------------------|------------|-----|
| Eukaryota | Putative uncharacterized protein                              |           | Toxoplasma gondii VEG.                                 | EEE29738.1 |                                | B9QJ09     |     |
| Eukaryota | Putative uncharacterized protein                              |           | Toxoplasma gondii.                                     | EEE21454.1 |                                | B9PWS5     |     |
| Eukaryota | GNS1/SUR4 family domain-containing protein                    |           | Toxoplasma gondii ME49.                                | EEB02303.1 | XP_002369443.1                 | B6KNM0     |     |
| Eukaryota | GNS1/SUR4 domain containing protein                           |           | Plasmodium vivax.                                      | EDL45005.1 | XP_001614732.1                 | A5K6R4     |     |
| Eukaryota | Fatty acid elongase, putative                                 |           | Plasmodium knowlesi (strain H).                        | CAQ39243.1 | XP_002258471.1                 | B3L2L7     |     |
| Eukaryota | Long chain fatty acid elongation enzyme, putative             |           | Plasmodium falciparum (isolate 3D7).                   | CAX64222.1 | XP_002808941.1                 | C0H545     |     |
| Eukaryota | 30 kDa glycoprotein                                           |           | Plasmodium yoelii yoelii.                              | EAA17248.1 | XP_725683.1                    | Q7RE21     |     |
| Eukaryota | Putative uncharacterized protein                              |           | Branchiostoma floridae (Florida lancelet) (Amphioxus). | EEN44779.1 | XP_002588768.1                 | C3ZRH9     |     |
| Eukaryota | PREDICTED: similar to elongase, putative                      |           | Strongylocentrotus purpuratus                          |            | XP_001202838.1,<br>XP_794194.2 |            |     |
| Eukaryota | Protein F56H11.3a, partially confirmed by transcript evidence |           | Caenorhabditis elegans.                                | CAA92960.2 | NP_501691.2                    | Q20904 [T] |     |
| Eukaryota | C. briggsae CBR-ELO-7 protein                                 |           | Caenorhabditis briggsae.                               | CAP37155.1 | XP_002633947.1                 | A8XWY6     |     |
| Eukaryota | C. briggsae CBR-ELO-5 protein                                 |           | Caenorhabditis briggsae.                               | CAP37101.1 | XP_002633893.1                 | A8XWT2     |     |

|           |                                                   |  |                                          |            |                |            |  |
|-----------|---------------------------------------------------|--|------------------------------------------|------------|----------------|------------|--|
| Eukaryota | Fatty acid elongation protein 5                   |  | Caenorhabditis elegans.                  | AAK29808.1 | NP_500793.1    | Q20300 [P] |  |
| Eukaryota | C. briggsae CBR-ELO-2 protein                     |  | Caenorhabditis briggsae.                 | CAP21889.1 | XP_002632413.1 | A8WN34     |  |
| Eukaryota | Protein F11E6.5, confirmed by transcript evidence |  | Caenorhabditis elegans.                  | CAB02921.1 | NP_503114.1    | Q9XVQ9 [T] |  |
| Eukaryota | Predicted protein                                 |  | Monosiga brevicollis (Choanoflagellate). | EDQ92757.1 | XP_001742519.1 | A9UNT8     |  |
| Eukaryota | Fatty acid elongase, putative                     |  | Leishmania braziliensis.                 | CAM37538.1 | XP_001563360.1 | A4H7M7     |  |
| Eukaryota | Fatty acid elongase, putative                     |  | Leishmania braziliensis.                 | CAM37536.1 | XP_001563359.1 | A4H7M6     |  |
| Eukaryota | Fatty acid elongase, putative                     |  | Leishmania infantum.                     | CAM66720.1 | XP_001464338.1 | A4HW97     |  |
| Eukaryota | Fatty acid elongase, putative                     |  | Leishmania major.                        | CAJ02986.1 | XP_001687668.1 | Q4QFR6     |  |
| Eukaryota | Fatty acid elongase, putative                     |  | Leishmania infantum.                     | CAM66631.1 | XP_001464252.1 | A4HW11     |  |
| Eukaryota | Fatty acid elongase, putative                     |  | Trypanosoma cruzi.                       | EAN96213.1 | XP_818064.1    | Q4DUK4     |  |
| Eukaryota | Fatty acid elongase, putative                     |  | Trypanosoma cruzi.                       | EAN87793.1 | XP_809644.1    | Q4D5J7     |  |
| Eukaryota | Fatty acid elongase, putative                     |  | Leishmania braziliensis.                 | CAM37541.1 | XP_001563363.1 | A4H7N0     |  |
| Eukaryota | Fatty acid elongase, putative                     |  | Leishmania infantum.                     | CAM66638.1 | XP_001464259.1 | A4HW18     |  |



|           |                               |  |                                         |                           |                |        |  |
|-----------|-------------------------------|--|-----------------------------------------|---------------------------|----------------|--------|--|
| Eukaryota | Fatty acid elongase, putative |  | Leishmania major.                       | CAJ03035.1                | XP_001687675.1 | Q4QFQ9 |  |
| Eukaryota | Fatty acid elongase, putative |  | Trypanosoma brucei.                     | AAX70673.1,<br>AAZ12480.1 | XP_846039.1    | Q57UP6 |  |
| Eukaryota | Fatty acid elongase, putative |  | Trypanosoma brucei gambiense<br>DAL972. | CBH12548.1                |                | C9ZT13 |  |
| Eukaryota | Fatty acid elongase, putative |  | Trypanosoma cruzi.                      | EAN96212.1                | XP_818063.1    | Q4DUK5 |  |
| Eukaryota | Fatty acid elongase, putative |  | Trypanosoma cruzi.                      | EAN92119.1                | XP_813970.1    | Q4DHY3 |  |
| Eukaryota | Fatty acid elongase, putative |  | Leishmania braziliensis.                | CAM37533.1                | XP_001563356.1 | A4H7M3 |  |
| Eukaryota | Fatty acid elongase, putative |  | Leishmania major.                       | CAJ02967.1                | XP_001687665.1 | Q4QFR9 |  |
| Eukaryota | Fatty acid elongase, putative |  | Leishmania infantum.                    | CAM66627.1                | XP_001464249.1 | A4HW08 |  |
| Eukaryota | Fatty acid elongase, putative |  | Leishmania braziliensis.                | CAM37532.1                | XP_001563355.1 | A4H7M2 |  |
| Eukaryota | Fatty acid elongase, putative |  | Leishmania major.                       | CAJ02963.1                | XP_001687664.1 | Q4QFS0 |  |
| Eukaryota | Fatty acid elongase, putative |  | Leishmania infantum.                    | CAM66626.1                | XP_001464248.1 | A4HW07 |  |
| Eukaryota | Fatty acid elongase, putative |  | Leishmania braziliensis.                | CAM37535.1                | XP_001563358.1 | A4H7M5 |  |
| Eukaryota | Fatty acid elongase, putative |  | Leishmania major.                       | CAJ02982.1                | XP_001687667.1 | Q4QFR7 |  |

|           |                                                               |  |                                      |                           |                |            |  |
|-----------|---------------------------------------------------------------|--|--------------------------------------|---------------------------|----------------|------------|--|
| Eukaryota | Fatty acid elongase, putative                                 |  | Leishmania infantum.                 | CAM66630.1                | XP_001464251.1 | A4HW10     |  |
| Eukaryota | Fatty acid elongase, putative                                 |  | Trypanosoma brucei gambiense DAL972. | CBH12551.1                |                | C9ZT16     |  |
| Eukaryota | Fatty acid elongase, putative                                 |  | Trypanosoma brucei.                  | AAX70671.1,<br>AAZ12482.1 | XP_846041.1    | Q57UP8     |  |
| Eukaryota | Fatty acid elongase, putative                                 |  | Trypanosoma cruzi.                   | EAN96210.1                | XP_818061.1    | Q4DUK7     |  |
| Eukaryota | Fatty acid elongase, putative                                 |  | Trypanosoma cruzi.                   | EAN92121.1                | XP_813972.1    | Q4DHY1     |  |
| Eukaryota | Fatty acid elongase, putative                                 |  | Trypanosoma brucei gambiense DAL972. | CBH12550.1                |                | C9ZT15     |  |
| Eukaryota | Fatty acid elongase, putative                                 |  | Trypanosoma brucei.                  | AAX70672.1,<br>AAZ12481.1 | XP_846040.1    | Q57UP7     |  |
| Eukaryota | Fatty acid elongase, putative                                 |  | Trypanosoma cruzi.                   | EAN92120.1                | XP_813971.1    | Q4DHY2     |  |
| Eukaryota | Fatty acid elongase, putative                                 |  | Trypanosoma cruzi.                   | EAN96211.1                | XP_818062.1    | Q4DUK6     |  |
| Eukaryota | Fatty acid elongation protein, GNS1/SUR4 family, putative     |  | Plasmodium falciparum (isolate 3D7). | CAD49051.1                | XP_001351023.1 | Q8I251     |  |
| Eukaryota | Elongation of very long chain fatty acids protein 3, putative |  | Plasmodium vivax.                    | EDL43812.1                | XP_001613539.1 | A5K9S4     |  |
| Eukaryota | Integral membrane protein, gns1/sur4 family, putative         |  | Plasmodium knowlesi (strain H).      | CAQ38052.1                | XP_002257716.1 | B3KZI4     |  |
| Eukaryota | Fatty acid elongase                                           |  | Labyrinthula sp. ND50.               | ACM17823.1                |                | B9VJL2 [T] |  |

|           |                                                                                     |         |                                      |                                    |                |                        |  |
|-----------|-------------------------------------------------------------------------------------|---------|--------------------------------------|------------------------------------|----------------|------------------------|--|
| Eukaryota | Fatty-acyl elongase                                                                 |         | Cryptosporidium hominis.             | EAL36110.1                         | XP_666343.1    | Q5CHM8                 |  |
| Eukaryota | 7 pass integral membrane protein with FLHWFHH motif shared with fatty-acyl elongase |         | Cryptosporidium parvum Iowa II.      | EAK89598.1                         | XP_627348.1    | Q5CVC1                 |  |
| Eukaryota | Putative fatty-acyl elongase                                                        |         | Cryptosporidium parvum.              | AA034582.1                         |                | Q86LT1                 |  |
| Eukaryota | Beta-ketoacyl-CoA synthase, putative                                                |         | Cryptosporidium muris (strain RN66). | EEA05127.1                         | XP_002139476.1 | B6AA86                 |  |
| Eukaryota | Fatty acid elongase                                                                 | 2.3.1.- | Ectocarpus siliculosus Ec 32         | CBN78890.1                         |                |                        |  |
| Eukaryota | Putative uncharacterized protein                                                    |         | Toxoplasma gondii VEG.               | EEB00626.1, EEE20374.1, EEE30738.1 | XP_002367766.1 | B6KIC1, B9Q055, B9QF85 |  |
| Eukaryota | Fatty-acyl elongase, putative                                                       |         | Perkinsus marinus ATCC 50983.        | EER07285.1                         | XP_002775469.1 | C5L723                 |  |
| Eukaryota | Fatty-acyl elongase, putative                                                       |         | Perkinsus marinus ATCC 50983.        | EER03348.1                         | XP_002771532.1 | C5LIE5                 |  |
| Eukaryota | Fatty-acyl elongase, putative                                                       |         | Perkinsus marinus ATCC 50983.        | EER03347.1                         | XP_002771531.1 | C5LIE4                 |  |
| Eukaryota | Fatty-acyl elongase, putative                                                       |         | Perkinsus marinus ATCC 50983.        | EER07286.1                         | XP_002775470.1 | C5L724                 |  |
| Eukaryota | Fatty-acyl elongase, putative                                                       |         | Perkinsus marinus ATCC 50983.        | EER19589.1                         | XP_002787793.1 | C5K7Q4                 |  |
| Eukaryota | Fatty-acyl elongase, putative                                                       |         | Perkinsus marinus ATCC 50983.        | EER13032.1                         | XP_002781237.1 | C5KR61                 |  |
| Eukaryota | Elongation of very long chain fatty acids protein, putative                         |         | Phytophthora infestans T30-4.        | EEY61162.1                         | XP_002908079.1 | D0MT65                 |  |

|           |                                                     |  |                                                        |                                    |                |                    |  |
|-----------|-----------------------------------------------------|--|--------------------------------------------------------|------------------------------------|----------------|--------------------|--|
| Eukaryota | Fatty acid elongase                                 |  | Nannochloropsis oculata.                               | ACV21066.1                         |                | D2DPY9 [T]         |  |
| Eukaryota | Predicted protein                                   |  | Phaeodactylum tricornutum CCAP 1055/1.                 | EEC43716.1                         | XP_002184657.1 | B7GC51             |  |
| Eukaryota | Predicted protein                                   |  | Phaeodactylum tricornutum CCAP 1055/1.                 | EEC43799.1                         | XP_002184740.1 | B7GC46             |  |
| Eukaryota | Long chain fatty acid elongase                      |  | Thalassiosira pseudonana (Marine diatom).              | EED89131.1                         | XP_002293395.1 | B8CBIO             |  |
| Eukaryota | Putative uncharacterized protein                    |  | Branchiostoma floridae (Florida lancelet) (Amphioxus). | EEN63427.1                         | XP_002607417.1 | C3Y8J0             |  |
| Eukaryota | GNS1/SUR4 family protein                            |  | Brugia malayi (Filarial nematode worm).                | EDP31843.1                         | XP_001899035.1 | A8PY71             |  |
| Eukaryota | Protein F56H11.3b, confirmed by transcript evidence |  | Caenorhabditis elegans.                                | AAF70462.1, CAA92958.1, CBJ25081.1 | NP_501689.1    | D3KFU0, Q20901 [T] |  |
| Eukaryota | C. briggsae CBR-ELO-1 protein                       |  | Caenorhabditis briggsae.                               | CAP37153.1                         | XP_002633945.1 | A8XWY4             |  |
| Eukaryota | Fatty acid elongation protein 3, putative           |  | Brugia malayi (Filarial nematode worm).                | EDP39371.1                         | XP_001891832.1 | A8NFQ6             |  |
| Eukaryota | C. briggsae CBR-ELO-6 protein                       |  | Caenorhabditis briggsae.                               | CAP37099.1                         | XP_002633891.1 | A8XWTO             |  |
| Eukaryota | Fatty acid elongation protein 6                     |  | Caenorhabditis elegans.                                | AAK29807.1                         | NP_500797.1    | Q20303 [T]         |  |
| Eukaryota | Putative uncharacterized protein                    |  | Trichoplax adhaerens.                                  | EDV26039.1                         | XP_002112072.1 | B3RVR2             |  |
| Eukaryota | PREDICTED: baldspot-like                            |  | Saccoglossus kowalevskii                               |                                    | XP_002730580.1 |                    |  |

|           |                                                                                           |  |                                                        |            |                                |                         |  |
|-----------|-------------------------------------------------------------------------------------------|--|--------------------------------------------------------|------------|--------------------------------|-------------------------|--|
| Eukaryota | PREDICTED: elongation of very long chain fatty acids-like 6-like                          |  | Saccoglossus kowalevskii                               |            | XP_002730581.1                 |                         |  |
| Eukaryota | Putative uncharacterized protein                                                          |  | Branchiostoma floridae (Florida lancelet) (Amphioxus). | EEN48619.1 | XP_002592608.1                 | C3ZFL1                  |  |
| Eukaryota | Putative uncharacterized protein                                                          |  | Trichoplax adhaerens.                                  | EDV25299.1 | XP_002111332.1                 | B3RUA6                  |  |
| Eukaryota | PREDICTED: baldspot-like                                                                  |  | Saccoglossus kowalevskii                               |            | XP_002740723.1                 |                         |  |
| Eukaryota | Hypothetical 34.1 kDa protein C40H1.4 in chromosome III, putative                         |  | Brugia malayi (Filarial nematode worm).                | EDP34257.1 | XP_001896896.1                 | A8PJ45                  |  |
| Eukaryota | Protein Y53F4B.2, confirmed by transcript evidence                                        |  | Caenorhabditis elegans.                                | CAB61069.1 | NP_497086.1                    | Q9NAC6                  |  |
| Eukaryota | C. briggsae CBR-ELO-9 protein                                                             |  | Caenorhabditis briggsae.                               | CAP37831.1 | XP_002631698.1                 | A8XYW4                  |  |
| Eukaryota | GNS1/SUR4 family protein                                                                  |  | Brugia malayi (Filarial nematode worm).                | EDP30657.1 | XP_001900443.1                 | A8Q745                  |  |
| Eukaryota | C. briggsae CBR-ELO-4 protein                                                             |  | Caenorhabditis briggsae.                               | CAP29621.1 | XP_002641772.1                 | A8XAF3                  |  |
| Eukaryota | Putative fatty acid elongation protein 4                                                  |  | Caenorhabditis elegans.                                | CAA79555.1 | NP_499056.1                    | Q03574 [T],<br>Q03574.1 |  |
| Eukaryota | PREDICTED: elongation of very long chain fatty acids-like 6-like                          |  | Saccoglossus kowalevskii                               |            | XP_002734639.1                 |                         |  |
| Eukaryota | PREDICTED: hypothetical protein                                                           |  | Strongylocentrotus purpuratus                          |            | XP_001187222.1,<br>XP_781194.1 |                         |  |
| Eukaryota | PREDICTED: similar to ELOVL family member 6, elongation of long chain fatty acids (yeast) |  | Strongylocentrotus purpuratus                          |            | XP_001202419.1,<br>XP_790118.1 |                         |  |

|           |                                                                  |  |                                                        |            |                                                                      |                         |  |
|-----------|------------------------------------------------------------------|--|--------------------------------------------------------|------------|----------------------------------------------------------------------|-------------------------|--|
| Eukaryota | C. briggsae CBR-ELO-3 protein                                    |  | Caenorhabditis briggsae.                               | CAP26513.1 | XP_002633120.1                                                       | A8X1K3                  |  |
| Eukaryota | Putative fatty acid elongation protein 3                         |  | Caenorhabditis elegans.                                | AAA82288.2 | NP_501147.2                                                          | P49191 [P],<br>P49191.2 |  |
| Eukaryota | PREDICTED: baldspot-like                                         |  | Saccoglossus kowalevskii                               |            | XP_002740724.1                                                       |                         |  |
| Eukaryota | PREDICTED: elongation of very long chain fatty acids-like 6-like |  | Saccoglossus kowalevskii                               |            | XP_002739878.1                                                       |                         |  |
| Eukaryota | PREDICTED: elongation of very long chain fatty acids-like 6-like |  | Saccoglossus kowalevskii                               |            | XP_002739877.1                                                       |                         |  |
| Eukaryota | Putative uncharacterized protein                                 |  | Branchiostoma floridae (Florida lancelet) (Amphioxus). | EEN61466.1 | XP_002605456.1                                                       | C3YEF8                  |  |
| Eukaryota | PREDICTED: similar to elongase, putative                         |  | Strongylocentrotus purpuratus                          |            | XP_001180089.1,<br>XP_789064.1                                       |                         |  |
| Eukaryota | PREDICTED: elongation of very long chain fatty acids-like 6-like |  | Saccoglossus kowalevskii                               |            | XP_002736035.1                                                       |                         |  |
| Eukaryota | PREDICTED: similar to elongase, putative                         |  | Strongylocentrotus purpuratus                          |            | XP_001186899.1,<br>XP_001186991.1,<br>XP_001198074.1,<br>XP_795994.1 |                         |  |
| Eukaryota | ELOVL family member 6, elongation of long chain fatty acids      |  | Acyrtosiphon pisum                                     |            | NP_001156725.1                                                       |                         |  |
| Eukaryota | Elongase, putative                                               |  | Aedes aegypti (Yellowfever mosquito) (Culex aegypti).  | EAT34657.1 | XP_001656366.1                                                       | Q16K45                  |  |
| Eukaryota | AGAP006520-PA                                                    |  | Anopheles gambiae (African malaria mosquito).          | EAU76616.2 | XP_001237830.2                                                       | A0NEU5                  |  |
| Eukaryota | Long chain fatty acid elongase                                   |  | Glossina morsitans morsitans (Savannah tsetse fly).    | ADD19917.1 |                                                                      | D3TQD9 [T]              |  |

|           |                                                                              |  |                                                                          |                                                                        |                             |            |  |
|-----------|------------------------------------------------------------------------------|--|--------------------------------------------------------------------------|------------------------------------------------------------------------|-----------------------------|------------|--|
| Eukaryota | GM24378                                                                      |  | <i>Drosophila sechellia</i> (Fruit fly).                                 | EDW41789.1                                                             | XP_002030803.1              | B4HJR2     |  |
| Eukaryota | GD12451                                                                      |  | <i>Drosophila simulans</i> (Fruit fly).                                  | EDX10758.1                                                             | XP_002085173.1              | B4QMW6     |  |
| Eukaryota | Transmembrane protein Noa                                                    |  | <i>Drosophila melanogaster</i> (Fruit fly).                              | AAF49430.2,<br>AAF75771.1,<br>AAG02080.1,<br>AAL28669.1,<br>AAN11736.2 | NP_648909.1,<br>NP_730187.2 | Q9VV87 [T] |  |
| Eukaryota | GG15860                                                                      |  | <i>Drosophila erecta</i> (Fruit fly).                                    | EDV52055.1                                                             | XP_001973029.1              | B3NDJ3     |  |
| Eukaryota | GK25673                                                                      |  | <i>Drosophila willistoni</i> (Fruit fly).                                | EDW79237.1                                                             | XP_002068251.1              | B4N3N2     |  |
| Eukaryota | GH16451                                                                      |  | <i>Drosophila grimshawi</i> (Fruit fly)<br>( <i>Idiomya grimshawi</i> ). | EDV96780.1                                                             | XP_001984432.1              | B4J008     |  |
| Eukaryota | GF10511                                                                      |  | <i>Drosophila ananassae</i> (Fruit fly).                                 | EDV40449.1                                                             | XP_001957643.1              | B3M4F5     |  |
| Eukaryota | GL12717                                                                      |  | <i>Drosophila persimilis</i> (Fruit fly).                                | EDW34783.1                                                             | XP_002026972.1              | B4H7Z3     |  |
| Eukaryota | GA17812                                                                      |  | <i>Drosophila pseudoobscura</i><br><i>pseudoobscura</i> (Fruit fly).     | EAL30565.1                                                             | XP_001353064.1              | Q29D49     |  |
| Eukaryota | GJ12451                                                                      |  | <i>Drosophila virilis</i> (Fruit fly).                                   | EDW68851.1                                                             | XP_002046509.1              | B4LCZ0     |  |
| Eukaryota | GI16709                                                                      |  | <i>Drosophila mojavensis</i> (Fruit fly).                                | EDW17115.1                                                             | XP_002011984.1              | B4L9R7     |  |
| Eukaryota | PREDICTED: similar to elongation<br>of very long chain fatty acids-like<br>6 |  | <i>Ciona intestinalis</i>                                                |                                                                        | XP_002123698.1              |            |  |
| Eukaryota | PREDICTED: hypothetical protein                                              |  | <i>Gallus gallus</i>                                                     |                                                                        | XP_001234271.1              |            |  |

|           |                                                                             |  |                                                              |                                                                                       |                                                      |                         |  |
|-----------|-----------------------------------------------------------------------------|--|--------------------------------------------------------------|---------------------------------------------------------------------------------------|------------------------------------------------------|-------------------------|--|
| Eukaryota | PREDICTED: similar to elongation of very long chain fatty acids-like 6-like |  | <i>Ciona intestinalis</i>                                    |                                                                                       | XP_002127892.1                                       |                         |  |
| Eukaryota | Elongation of very long chain fatty acids protein 6                         |  | <i>Danio rerio</i> (Zebrafish) ( <i>Brachydanio rerio</i> ). | AAH59459.1                                                                            | NP_955826.1                                          | Q6PC64 [T],<br>Q6PC64.1 |  |
| Eukaryota | Chromosome 20 SCAF14744, whole genome shotgun sequence.                     |  | <i>Tetraodon nigroviridis</i> (Green puffer).                | CAG04622.1                                                                            |                                                      | Q4S410                  |  |
| Eukaryota | elongation of very long chain fatty acids-like 6                            |  | <i>Xenopus (Silurana) tropicalis</i>                         |                                                                                       | NP_001017257.2                                       |                         |  |
| Eukaryota | MGC139109 protein                                                           |  | <i>Bos taurus</i> (Bovine).                                  | AAI48955.1,<br>DAA28878.1                                                             | NP_001095625.1                                       | A6QNQ7 [T]              |  |
| Eukaryota | Elongation of long chain fatty acids                                        |  | <i>Sus scrofa</i> (Pig).                                     | BAI47786.1                                                                            |                                                      | D0G6S8 [T]              |  |
| Eukaryota | PREDICTED: similar to elongation of very long chain fatty acids-like 6      |  | <i>Equus caballus</i>                                        |                                                                                       | XP_001502932.1                                       |                         |  |
| Eukaryota | PREDICTED: hypothetical protein                                             |  | <i>Monodelphis domestica</i>                                 |                                                                                       | XP_001367859.1                                       |                         |  |
| Eukaryota | Elongation of very long chain fatty acids protein 6                         |  | <i>Gallus gallus</i> (Chicken).                              | CAG32025.1                                                                            | NP_001026710.1                                       | Q5ZJR8 [T],<br>Q5ZJR8.1 |  |
| Eukaryota | PREDICTED: elongation of very long chain fatty acids-like 6                 |  | <i>Taeniopygia guttata</i>                                   |                                                                                       | XP_002195282.1                                       |                         |  |
| Eukaryota | PREDICTED: elongation of very long chain fatty acids protein 6 isoform 5    |  | <i>Macaca mulatta</i>                                        |                                                                                       | XP_001089527.1,<br>XP_001089649.1,<br>XP_001089764.1 |                         |  |
| Eukaryota | Long-chain fatty-acyl elongase                                              |  | <i>Homo sapiens</i> (Human).                                 | AAH01305.1,<br>AAY40928.1,<br>BAB15632.1,<br>BAC11225.1,<br>EAX06259.1,<br>EAX06260.1 | NP_001124193.1,<br>NP_076995.1                       | Q9H5J4 [T],<br>Q9H5J4.1 |  |



|           |                                                                                                                      |  |                                              |                                                                                                            |                                                                |                      |  |
|-----------|----------------------------------------------------------------------------------------------------------------------|--|----------------------------------------------|------------------------------------------------------------------------------------------------------------|----------------------------------------------------------------|----------------------|--|
| Eukaryota | PREDICTED: elongation of very long chain fatty acids protein 6-like isoform 4                                        |  | Callithrix jacchus                           |                                                                                                            | XP_002745528.1, XP_002745529.1, XP_002745530.1, XP_002745531.1 |                      |  |
| Eukaryota | Myelin-associated SUR4 protein                                                                                       |  | Mus musculus (Mouse).                        | AAH98492.1, AAI00577.1, AAL14239.1, AAM13450.1, BAB68544.1, BAC26252.1, BAE39469.1, EDL12240.1, EDL12241.1 | NP_569717.1                                                    | Q920L5 [T], Q920L5.1 |  |
| Eukaryota | Long-chain fatty-acyl elongase                                                                                       |  | Rattus norvegicus (Rat).                     | BAB69888.1, EDL82174.1, EDL82176.1                                                                         | NP_599210.1                                                    | Q920L6 [T], Q920L6.1 |  |
| Eukaryota | Putative uncharacterized protein                                                                                     |  | Ailuropoda melanoleuca (Giant panda).        | EFB22375.1                                                                                                 | XP_002917561.1                                                 | D2H706               |  |
| Eukaryota | PREDICTED: elongation of very long chain fatty acids-like 6                                                          |  | Oryctolagus cuniculus                        |                                                                                                            | XP_002717168.1                                                 |                      |  |
| Eukaryota | PREDICTED: similar to ELOVL family member 6, elongation of long chain fatty acids (FEN1/Elo2, SUR4/Elo3-like, yeast) |  | Canis familiaris                             |                                                                                                            | XP_545023.2                                                    |                      |  |
| Eukaryota | Chromosome 17 SCAF14760, whole genome shotgun sequence                                                               |  | Tetraodon nigroviridis (Green puffer).       | CAG05092.1                                                                                                 |                                                                | Q4S2P0               |  |
| Eukaryota | ELOVL family member 6, elongation of long chain fatty acids like                                                     |  | Danio rerio (Zebrafish) (Brachydanio rerio). | AAH46901.1, AAI64614.1                                                                                     | NP_958908.1                                                    | Q802X6 [T]           |  |
| Eukaryota | ELOVL family member 6, elongation of long chain fatty acids like                                                     |  | Danio rerio (Zebrafish) (Brachydanio rerio). | CAX14332.1                                                                                                 |                                                                | B8JK95               |  |
| Eukaryota | Zgc:92749                                                                                                            |  | Danio rerio (Zebrafish) (Brachydanio rerio). | AAH76227.1                                                                                                 | NP_001002570.1                                                 | Q6DGW0 [T]           |  |

|           |                                                                                                      |  |                                              |                                                |                |                      |  |
|-----------|------------------------------------------------------------------------------------------------------|--|----------------------------------------------|------------------------------------------------|----------------|----------------------|--|
| Eukaryota | Zgc:92749                                                                                            |  | Danio rerio (Zebrafish) (Brachydanio rerio). | AAH95172.1, AAI64609.1                         |                | Q503U9 [T]           |  |
| Eukaryota | Chromosome 2 SCAF14705, whole genome shotgun sequence.                                               |  | Tetraodon nigroviridis (Green puffer).       | CAG03017.1                                     |                | Q4S8L5               |  |
| Eukaryota | PREDICTED: elongation of very long chain fatty acids like 3                                          |  | Oryctolagus cuniculus                        |                                                | XP_002718621.1 |                      |  |
| Eukaryota | Putative uncharacterized protein                                                                     |  | Ailuropoda melanoleuca (Giant panda).        | EFB27646.1                                     | XP_002913927.1 | D2GXV8               |  |
| Eukaryota | PREDICTED: elongation of very long chain fatty acids like 3                                          |  | Pan troglodytes                              |                                                | XP_001171055.1 |                      |  |
| Eukaryota | Cold-inducible glycoprotein of 30 kDa                                                                |  | Homo sapiens (Human).                        | AAG17875.1, AAH34344.1, CAH71623.1, EAW49711.1 | NP_689523.1    | Q9HB03 [T], Q9HB03.2 |  |
| Eukaryota | PREDICTED: elongation of very long chain fatty acids protein 3-like                                  |  | Pongo abelii                                 |                                                | XP_002821134.1 |                      |  |
| Eukaryota | PREDICTED: similar to Elongation of very long chain fatty acids (FEN1/Elo2, SUR4/Elo3, yeast)-like 3 |  | Monodelphis domestica                        |                                                | XP_001379069.1 |                      |  |
| Eukaryota | PREDICTED: similar to olfactory receptor MOR103-7                                                    |  | Ornithorhynchus anatinus                     |                                                | XP_001511055.1 |                      |  |

OUTLIERS

| Type      | Sequence                                                         | EC Number | Organism                                                                              | GenBank ID | RefSeq         | UniProt    | PDB |                               |
|-----------|------------------------------------------------------------------|-----------|---------------------------------------------------------------------------------------|------------|----------------|------------|-----|-------------------------------|
| Eukaryota | Putative uncharacterized protein                                 |           | Branchiostoma floridae (Florida lancelet) (Amphioxus).                                | EEN64590.1 | XP_002608580.1 | C3Y557     |     | Between Subfamilies 5G and 5H |
| Eukaryota | PREDICTED: elongation of very long chain fatty acids-like 4-like |           | Saccoglossus kowalevskii                                                              |            | XP_002733299.1 |            |     |                               |
| Eukaryota | PREDICTED: elongation of very long chain fatty acids-like 4-like |           | Saccoglossus kowalevskii                                                              |            | XP_002732296.1 |            |     |                               |
| Eukaryota | Predicted protein                                                |           | Monosiga brevicollis (Choanoflagellate).                                              | EDQ85417.1 | XP_001749828.1 | A9VAQ9     |     |                               |
| Eukaryota | GNS1/SUR4 family protein                                         |           | Dictyostelium discoideum (Slime mold).                                                | EEU04154.1 | XP_002649204.1 | C7FZW5     |     |                               |
| Eukaryota | GNS1/SUR4 family protein                                         |           | Polysphondylium pallidum PN500.                                                       | EFA83001.1 |                | D3B6N1     |     |                               |
| Eukaryota | Predicted protein                                                |           | Monosiga brevicollis (Choanoflagellate).                                              | EDQ87885.1 | XP_001747418.1 | A9V3Y1     |     | Between Subfamilies 5G and 5H |
| Eukaryota | Polyunsaturated fatty acids delta-6-elongase                     |           | Ectocarpus siliculosus (Brown alga).                                                  | CBJ26764.1 |                | D7G1F6     |     |                               |
| Eukaryota | Polyunsaturated fatty acids delta-6-elongase                     |           | Thraustochytrium sp. FJN-10.                                                          | ABC18314.1 |                | Q2PWB7 [T] |     |                               |
| Eukaryota | GNS1/SUR4 membrane family protein                                |           | Arabidopsis lyrata subsp. lyrata.                                                     | EFH58732.1 | XP_002882473.1 | D7L5I3     |     |                               |
| Eukaryota | F24P17.3 protein                                                 |           | Arabidopsis thaliana (Mouse-ear cress).                                               | AAF08569.1 | NP_187298.1    | Q9SQV0     |     |                               |
| Eukaryota | GNS1/SUR4 membrane protein                                       |           | Medicago truncatula (Barrel medic).                                                   | ABD32385.2 |                | Q2HTN1     |     |                               |
| Eukaryota | Long chain fatty acid elongation enzyme                          |           | Gossypium hirsutum (Upland cotton) (Gossypium mexicanum).                             | CAE75664.1 |                | Q5K4I1 [T] |     |                               |
| Eukaryota | Predicted protein                                                |           | Populus trichocarpa (Western balsam poplar) (Populus balsamifera subsp. trichocarpa). | EEE78137.1 | XP_002303158.1 | B9GZG1     |     |                               |
| Eukaryota | Predicted protein                                                |           | Physcomitrella patens subsp. patens.                                                  | EDQ52371.1 | XP_001782794.1 | A9TW15     |     | Between Subfamilies 5G and 5H |

|           |                          |  |                                        |                           |                |                                |  |
|-----------|--------------------------|--|----------------------------------------|---------------------------|----------------|--------------------------------|--|
| Eukaryota | GNS1/SUR4 family protein |  | Dictyostelium discoideum (Slime mold). | EAL68656.2                | XP_642582.2    | Q7KWQ5                         |  |
| Eukaryota | GNS1/SUR4 family protein |  | Polysphondylium pallidum PN500.        | EFA77110.1                |                | D3BPA0                         |  |
| Eukaryota | Predicted protein        |  | Naegleria gruberi (Amoeba).            | EFC46498.1                | XP_002679242.1 | D2V9N5                         |  |
| Eukaryota | Fatty acid elongase A    |  | Dictyostelium discoideum (Slime mold). | ACJ09597.1,<br>EAL60997.1 | XP_629422.1    | Q54CJ4<br>[T],<br>Q54CJ4.<br>1 |  |
| Eukaryota | Protein SRE1 homolog     |  | Dictyostelium discoideum (Slime mold). | EAL66470.1                | XP_640460.1    | Q54TC9<br>[T],<br>Q54TC9.<br>1 |  |
| Eukaryota | Steroid isomerase        |  | Polysphondylium pallidum PN500.        | EFA85325.1                |                | D3B201                         |  |
| Eukaryota | Predicted protein        |  | Naegleria gruberi (Amoeba).            | EFC39165.1                | XP_002671909.1 | D2VVU2                         |  |
| Eukaryota | Predicted protein        |  | Naegleria gruberi (Amoeba).            | EFC39392.1                | XP_002672136.1 | D2VUW7                         |  |

families 5I and 5J

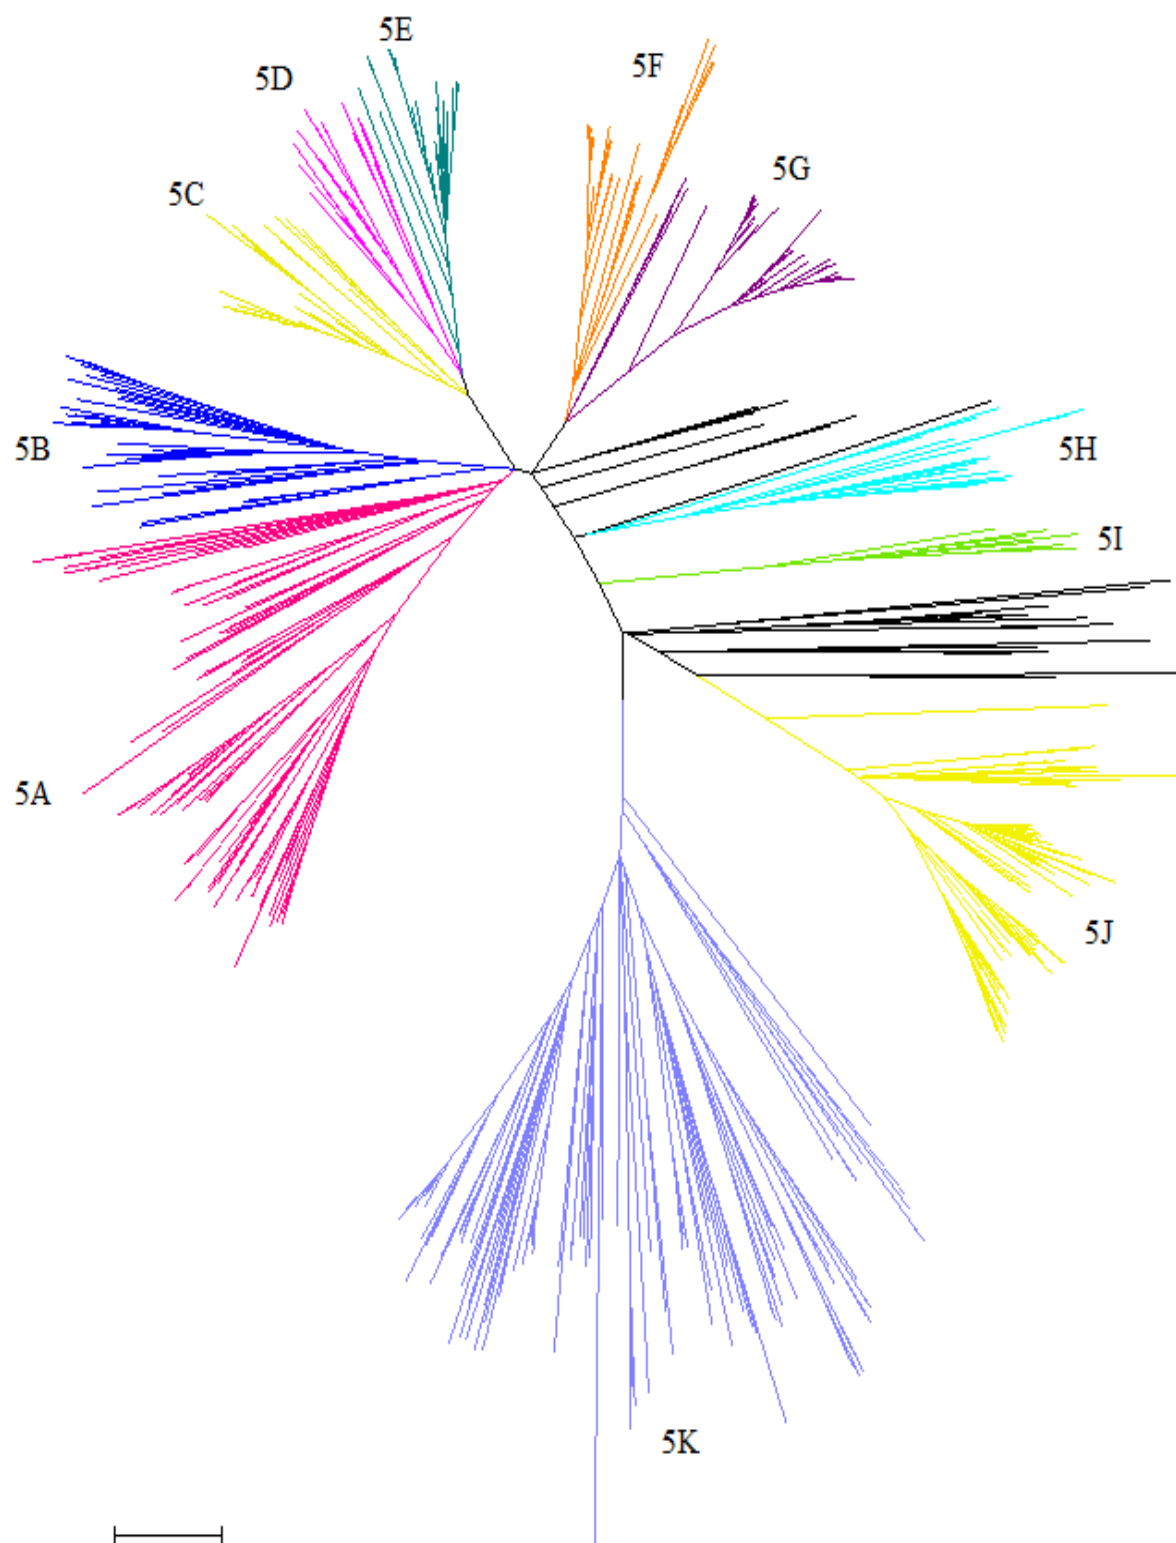

Supplement: pro0020-1659-SD8.pdf [file pro0020-1659-SD8.pdf]
