# Supplementary material
Source: PubMed Central journal article supplement (PMC3218358)

Figure S1B. Phylogenetic tree of Subfamily KS1B.

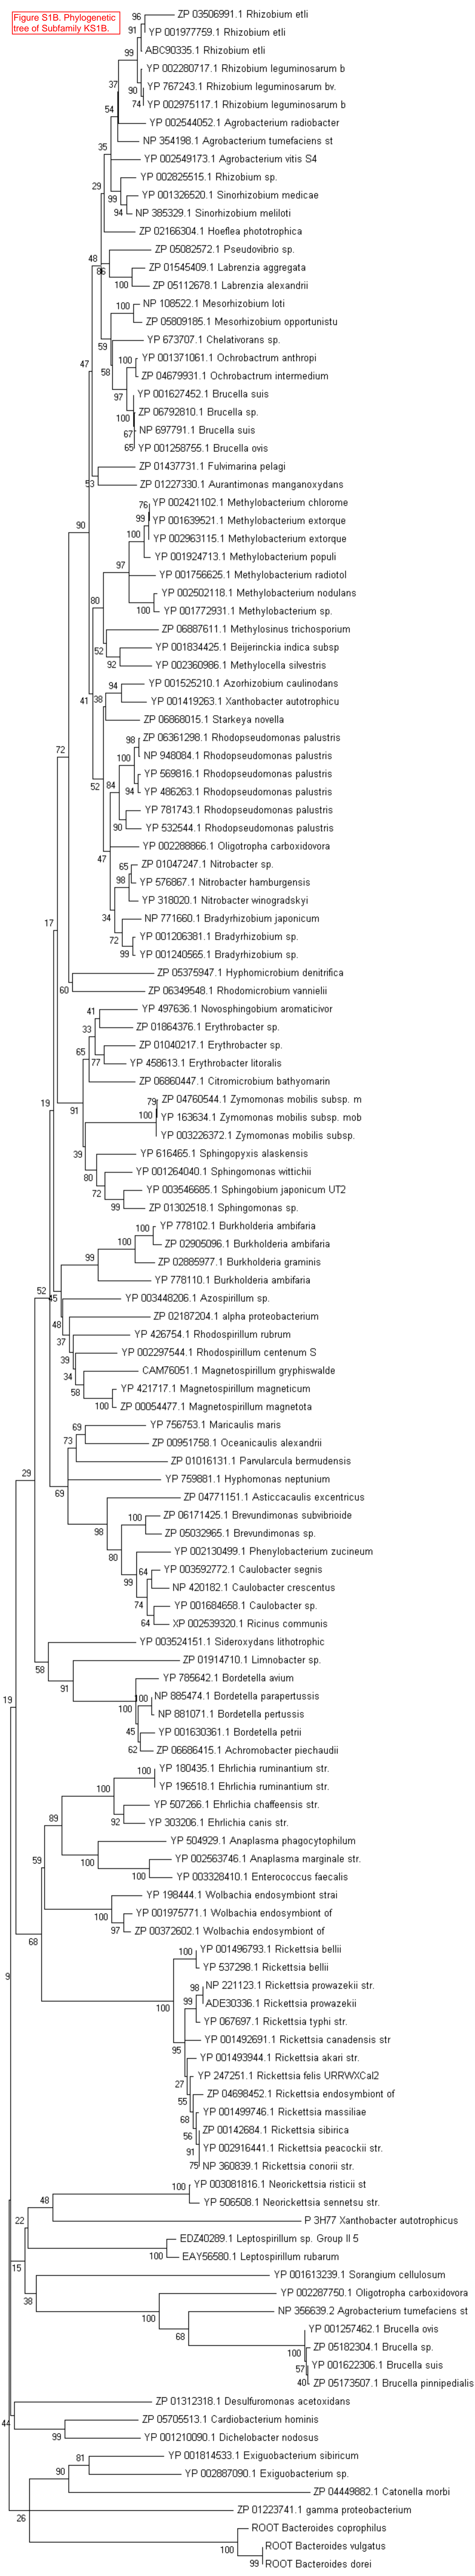

Figure S1C. Phylogenetic tree of Subfamily KS1C.

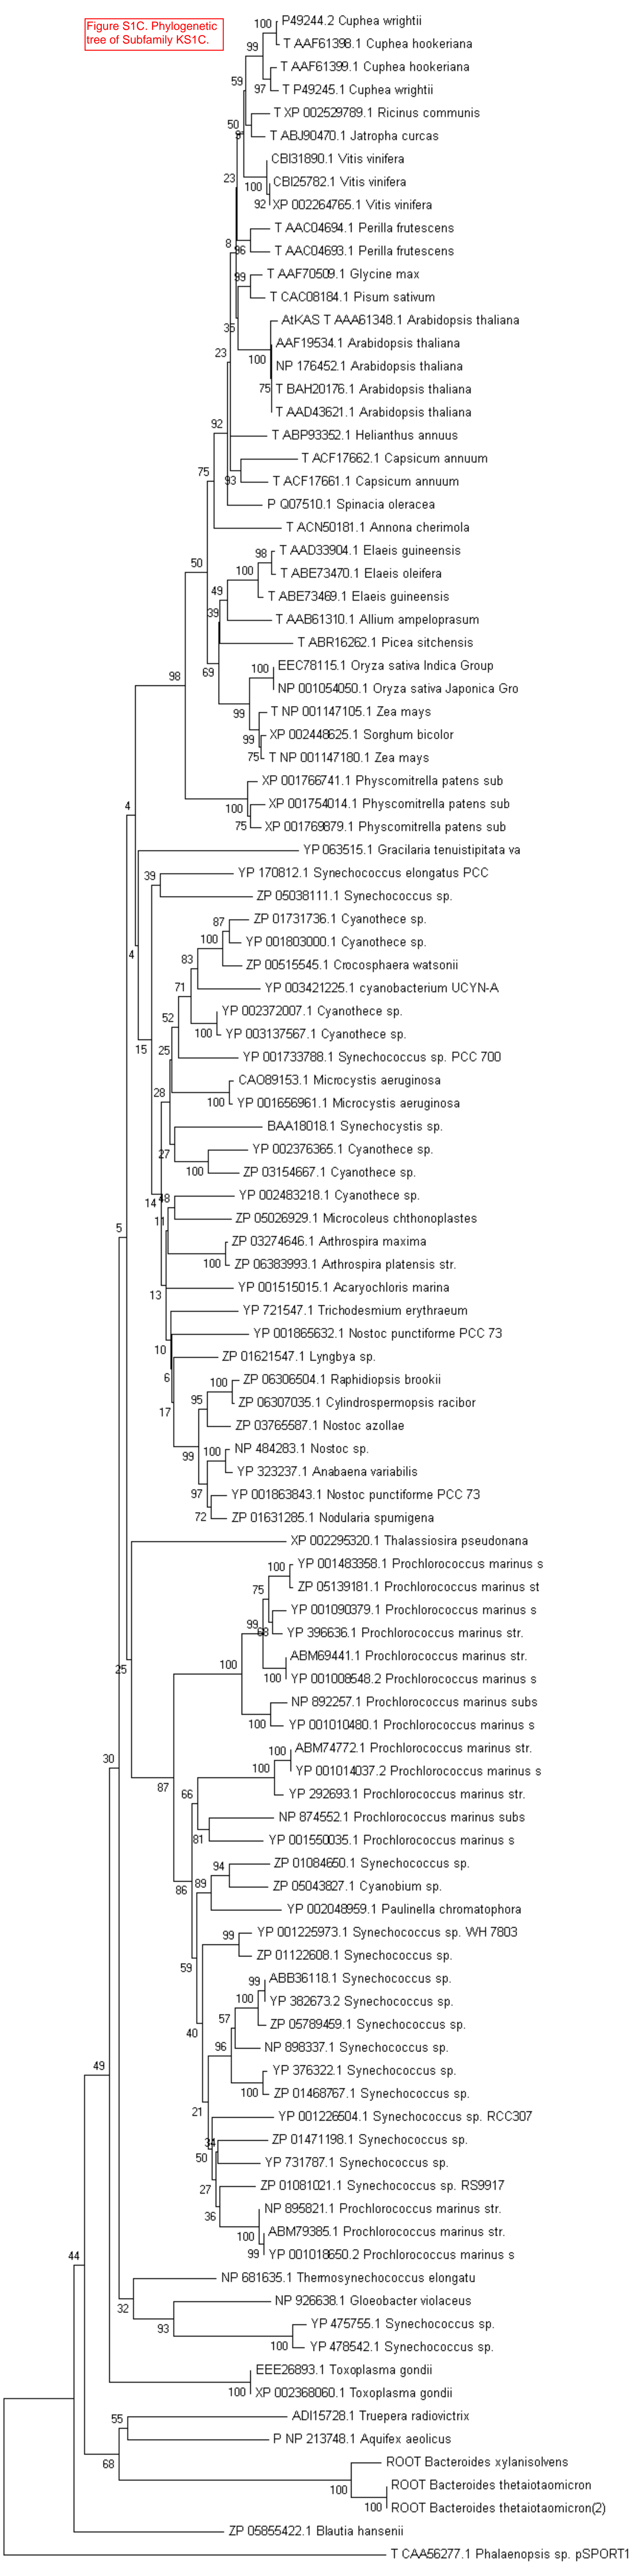

0.2

Figure S1D. Phylogenetic tree of Subfamily KS1D.

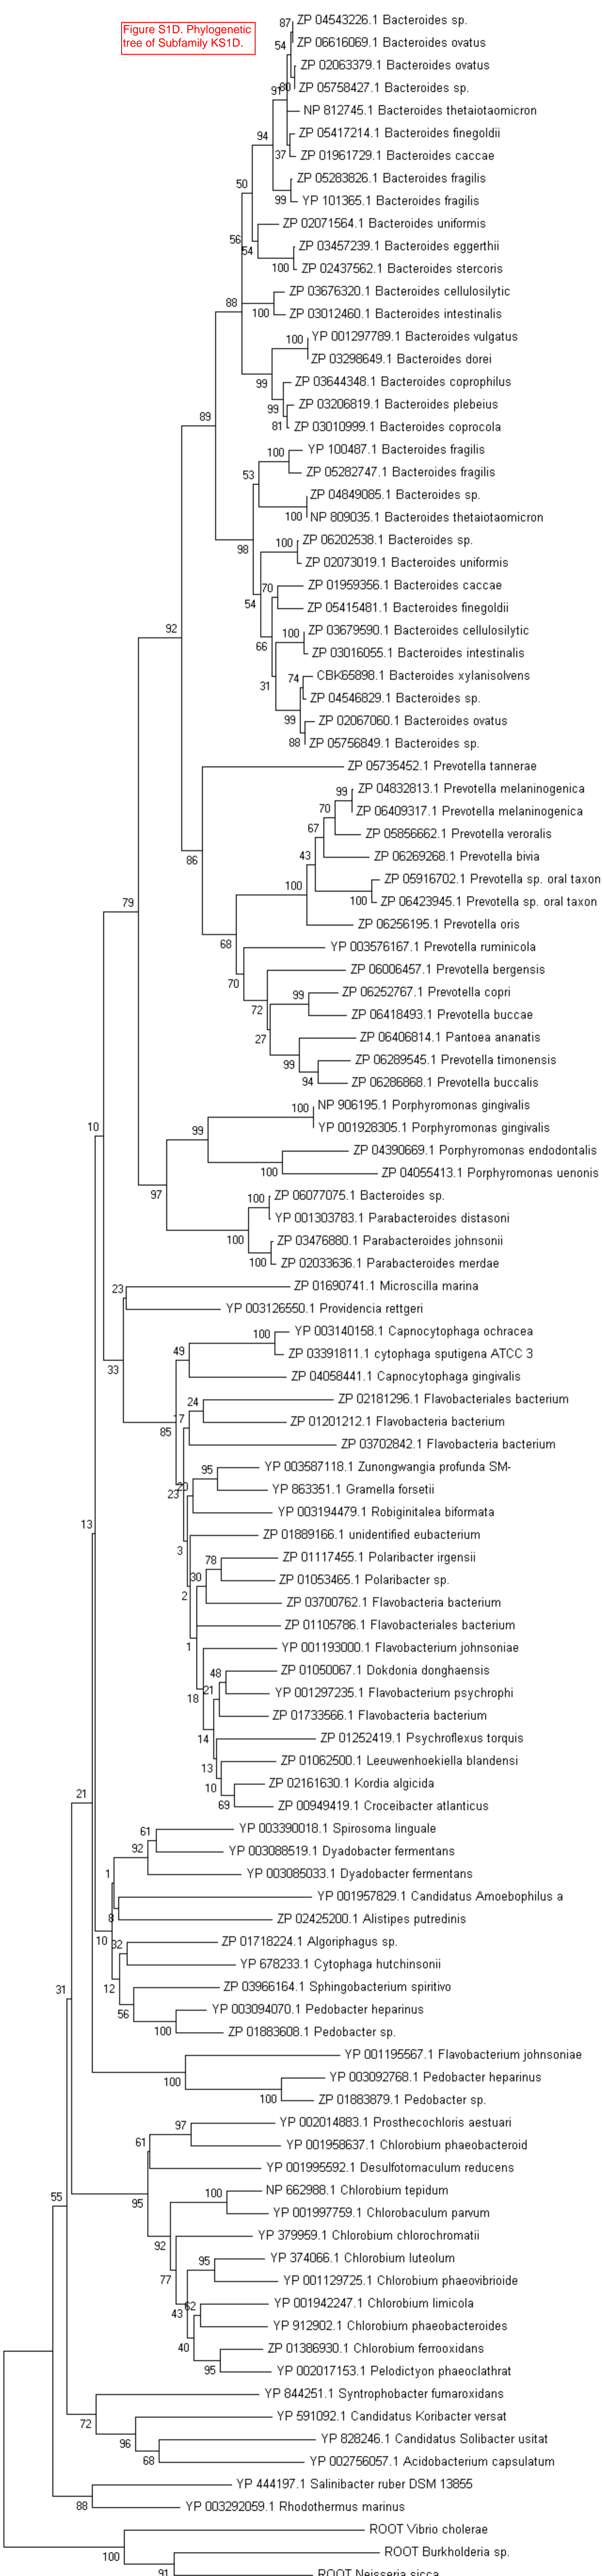

0.1

Figure S1E. Phylogenetic tree of Subfamily KS1E.

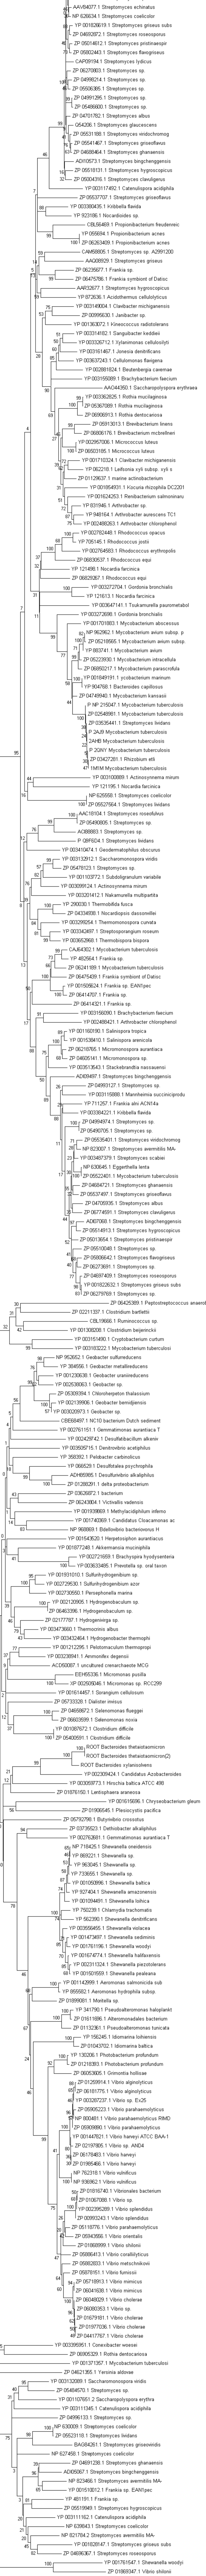

0.2

Figure S1F. Phylogenetic tree of Subfamily K1F.

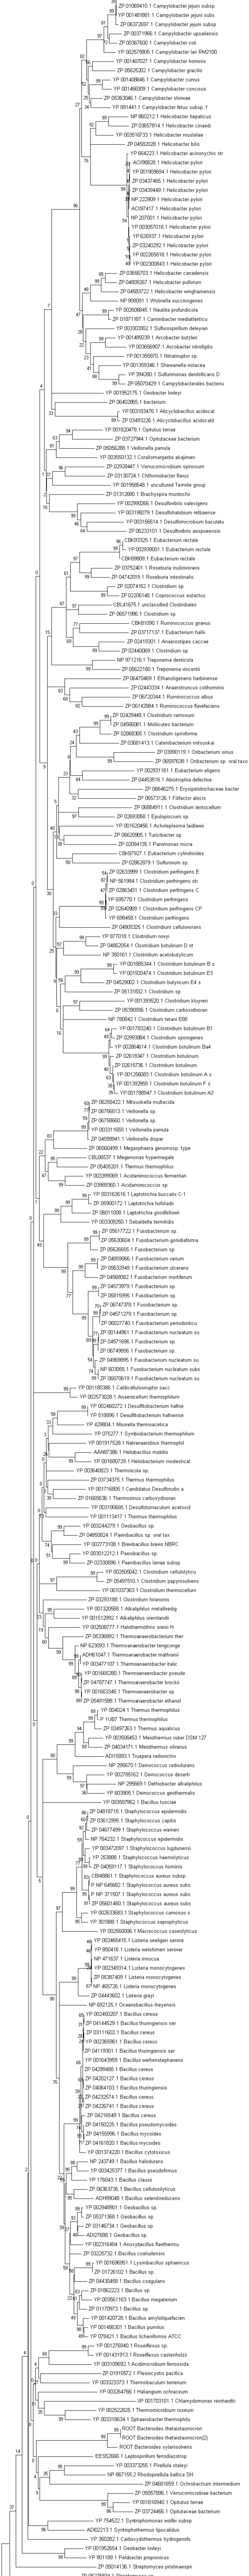

0.2

Figure S1G. Phylogenetic tree of Subfamily KS1G.

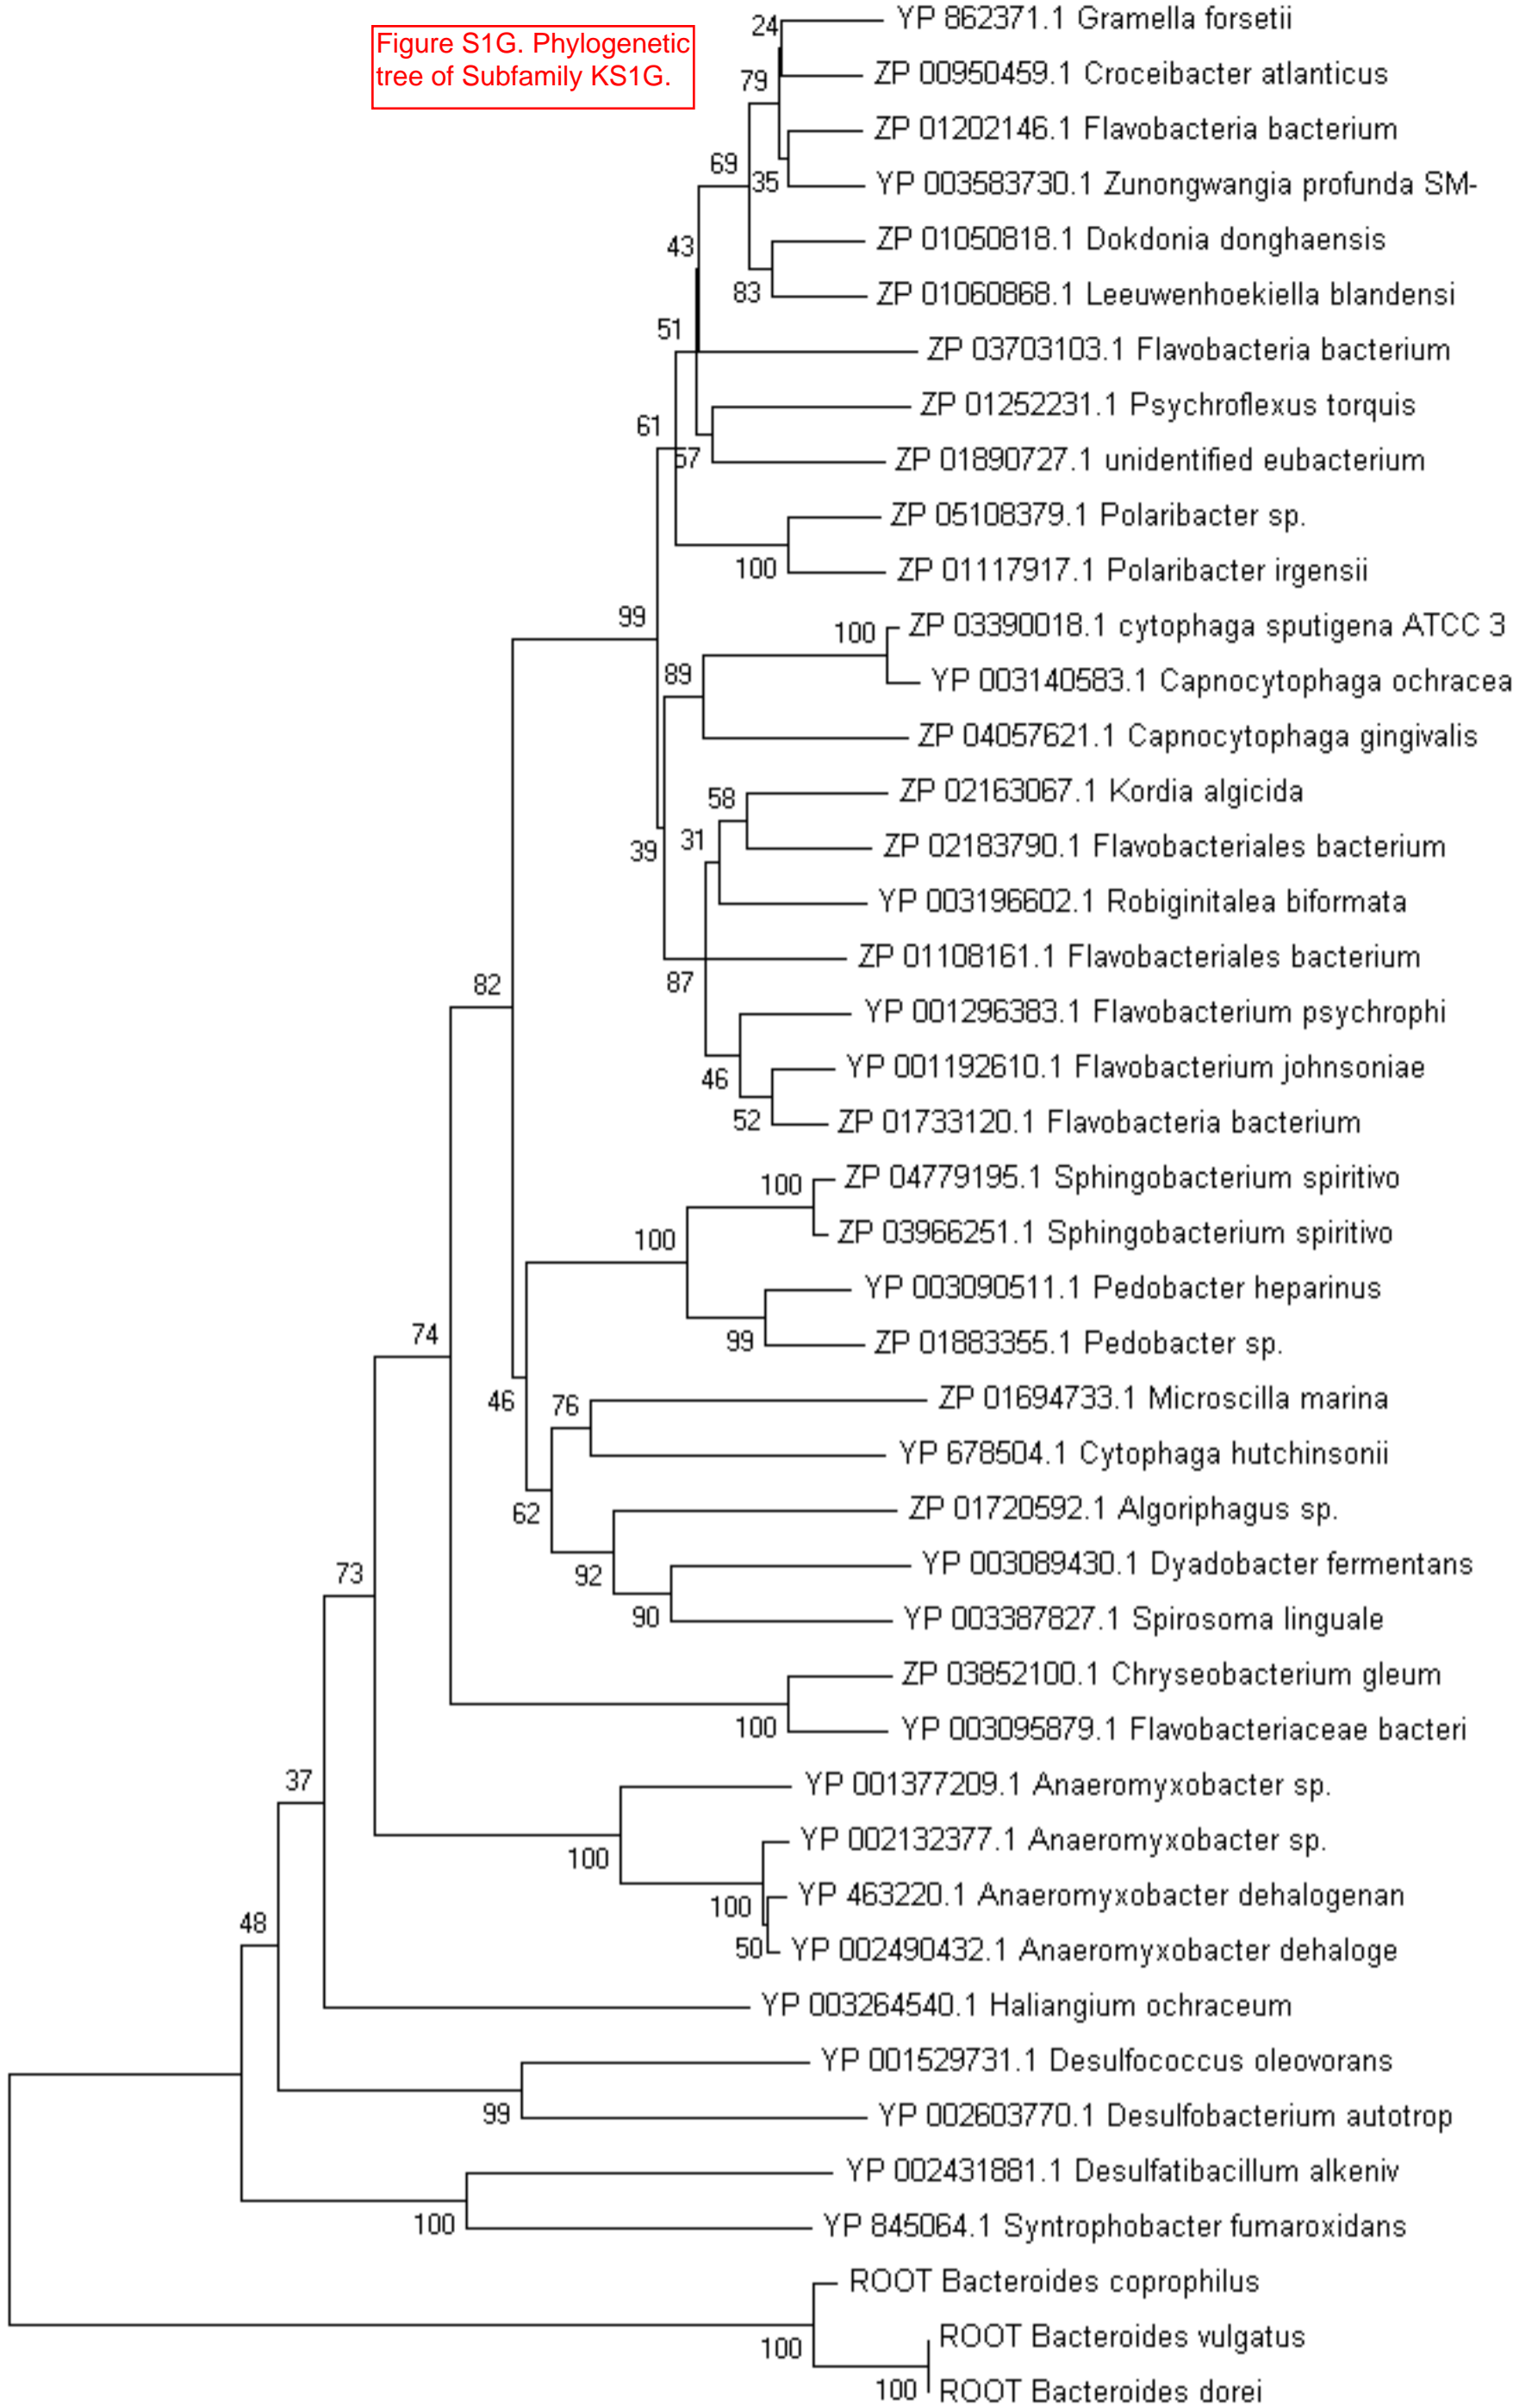

0.1

Figure S1H. Phylogenetic tree of Subfamily KS1H.

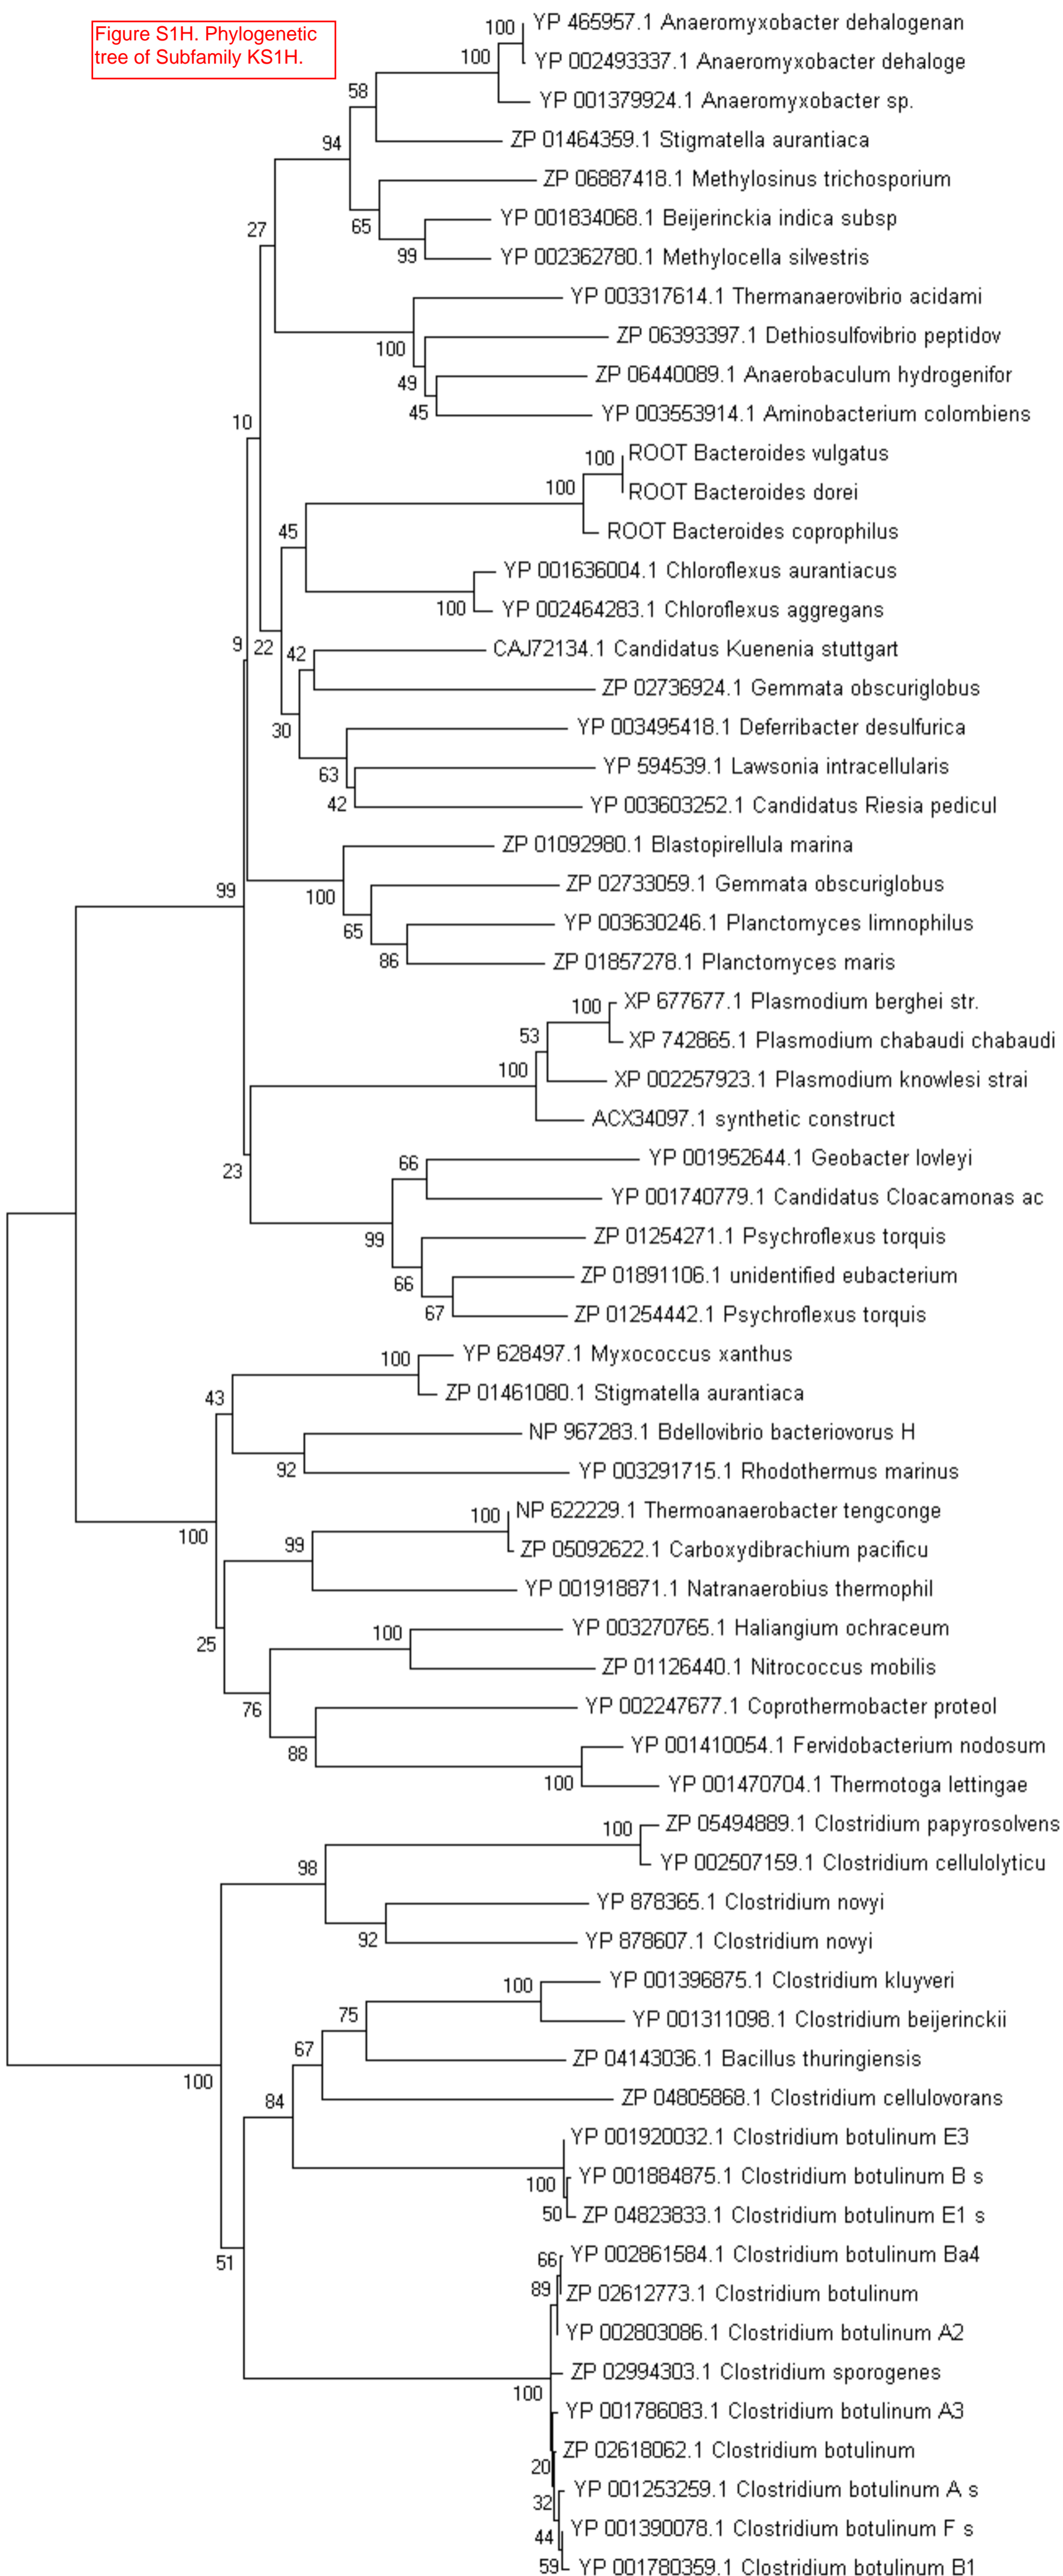

0.2



Figure S11. Phylogenetic tree of Subfamily KS11.

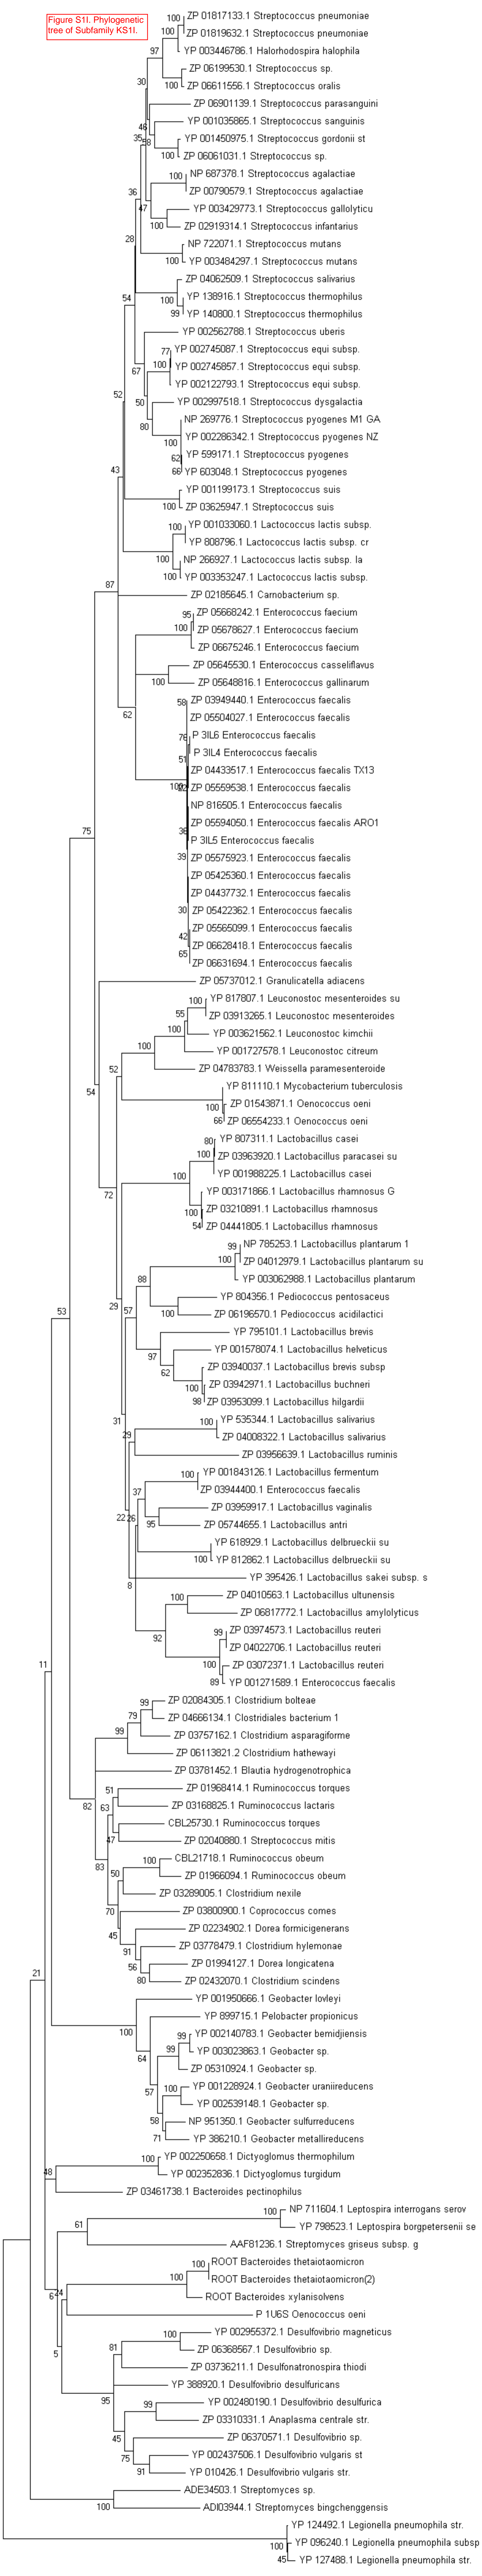

Figure S1J. Phylogenetic tree of Subfamily KS1J.

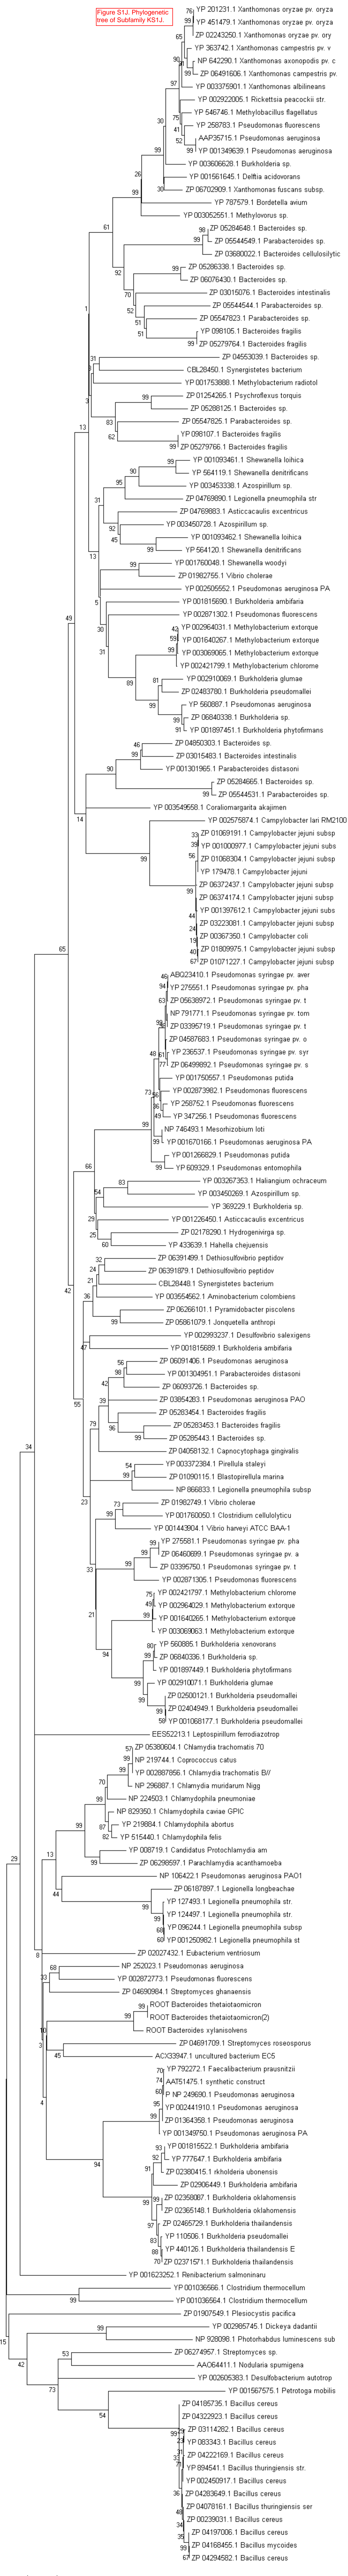

0.2

Figure S1K. Phylogenetic tree of Subfamily KS1K.

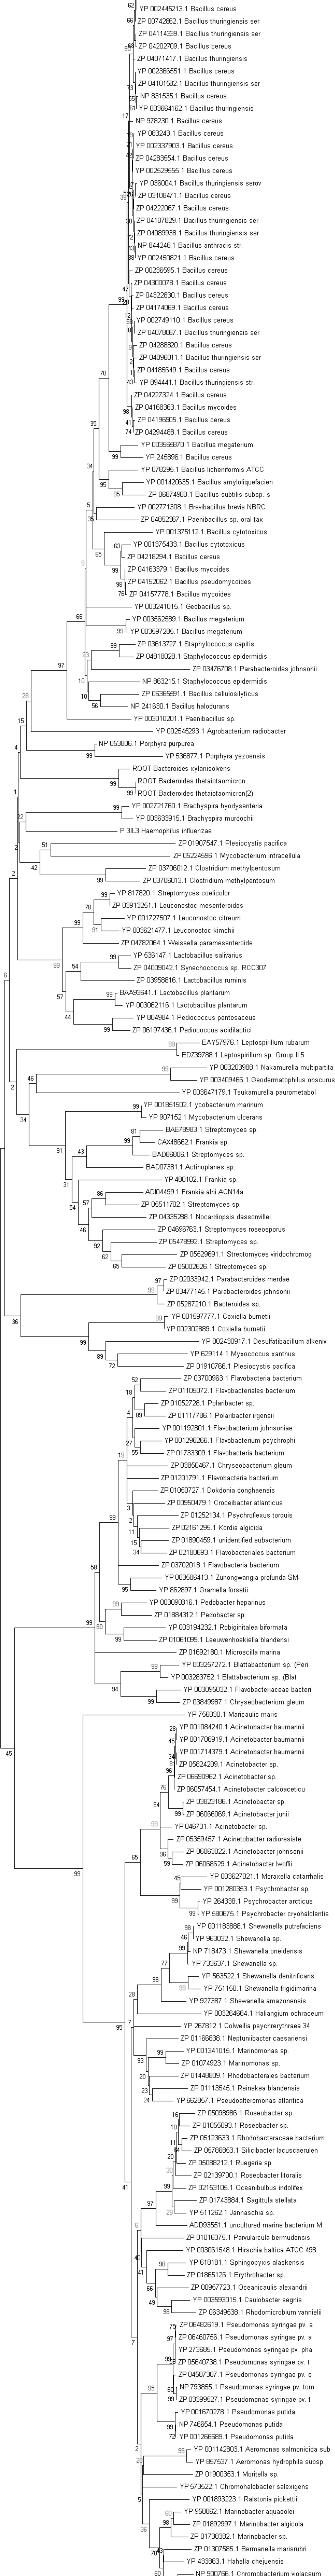

Figure S1L. Phylogenetic tree of Subfamily KS1K.

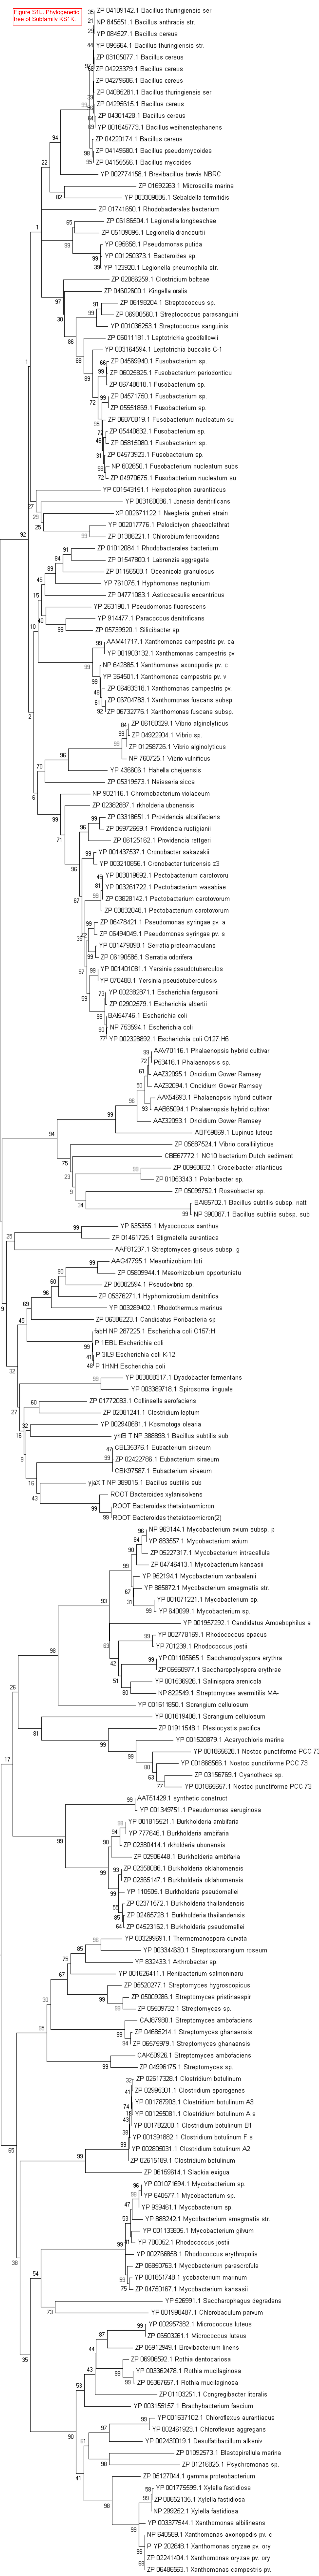

Supplement: pro0020-1659-SD2.pdf [file pro0020-1659-SD2.pdf]
