# Supplementary material
Source: PubMed Central journal article supplement (PMC3218358)
Supplement: pro0020-1659-SD3.pdf [file pro0020-1659-SD3.pdf]

**Figure S2. Multiple sequence alignment of KS1–KS5 sequences by ClustalX 2.0.12.**

```

KS3_Mycobacterium_tuberculosis      -----PVAVIGMACRLPGGIDSPPELLWKALLRGDDLLITEVPPDRW 40
KS3_Sus_scrofa                      -----EEVVIAGMSGKLEP-SENLEEFWANLIGGDMVTADD-RRW 39
KS3_Glycine_max                      -----
KS3_Cuphea_hookeriana                -----
KS3_Escherichia_coli_O157_H7        -----
KS4_Iris_x_hollandica                NIEEFRRARAEQGPATVLAIGTATPSNVVYQSEYPDYYFRITNSEHLTDL 50
KS4_Brassica_oleracea_var._cap       SLSEIRKAQRADGPAGILAIGTANPANHVIQAEYPDYYFRITNSEHMIDL 50
KS4_Pinus_strobus                    -LEAFRKSQRADGFASILAIGTANPPNVVDQSTYPDYYFRVTNNEEDNTDL 49
KS4_Aloe_arborescens                 NVGEGIRKAQRAEGTATVMAIGTAHPPHIFPQDTYADFYFRATNSEHKVEL 50
KS1_Capsicum_annuum                  -----
KS1_Arabidopsis_thaliana             -----
KS1_Elaeis_oleifera                  -----
KS1_Haemophilus_influenzae_Rd_      -----
KS1_Pseudomonas_aeruginosa           -----
KS2_Picea_sitchensis                 -----
KS2_Tropaeolum_majus                 -----
KS2_Arabidopsis_thaliana             -----
KS2_Oryza_sativa_Japonica_Grou      -----
KS2_Zea_mays                          -----
KS5_Nibea_mitsukurii                 -----
KS5_Macaca_fascicularis              -----
KS5_Xenopus_laevis                   -----
KS4_Streptomyces_coelicolor          -----
KS5_Bos_taurus                       -----
KS5_Caenorhabditis_elegans           -----

KS3_Mycobacterium_tuberculosis      DCDEFYDPQPGVPGRTVCKWGGFLDNPADFCEFFGIGEREAIIDPQQR 90
KS3_Sus_scrofa                      KAGLYGLP-----RRMGKCLKLSRFDASFFGVHSKQANTMDPQLR 79
KS3_Glycine_max                      -----LDDCLRYCIVAGKKAL 16
KS3_Cuphea_hookeriana                -----
KS3_Escherichia_coli_O157_H7        -----
KS4_Iris_x_hollandica                KEKFKRMCDKSMIRKRYMHLDEEILKQNPDMCAYMA-PSLDARQDIVVVE 99
KS4_Brassica_oleracea_var._cap       KEKFKRMCDKSGIRKRHMHLTEEFLEDNPNMCAYMA-PSLDVRQDVVVVE 99
KS4_Pinus_strobus                    KDKFKRICERSAIKKRHMVLTTEEILKKNPELCAFLEVPSLDRQAMLAEE 99
KS4_Aloe_arborescens                 KKKFDRICKKTMIGKRYFNYDEEFLKKYPNITSFDE-PSLNDRQDICVPG 99
KS1_Capsicum_annuum                  -----
KS1_Arabidopsis_thaliana             -----
KS1_Elaeis_oleifera                  -----
KS1_Haemophilus_influenzae_Rd_      -----
KS1_Pseudomonas_aeruginosa           -----
KS2_Picea_sitchensis                 -----YFMSQ 5
KS2_Tropaeolum_majus                 -----YFMSR 5
KS2_Arabidopsis_thaliana             -----YFMSK 5
KS2_Oryza_sativa_Japonica_Grou      -----
KS2_Zea_mays                          -----
KS5_Nibea_mitsukurii                 -----
KS5_Macaca_fascicularis              -----
KS5_Xenopus_laevis                   -----
KS4_Streptomyces_coelicolor          -----RLIENTGVRTRHIVQPIEDTLEHPGFEDRNKVYERE 36
KS5_Bos_taurus                       -----
KS5_Caenorhabditis_elegans           -----

KS3_Mycobacterium_tuberculosis      LLETSWEAMEHAGLTQQTLAGSATGVFAGVTHGDYTMVAADAKQLEEPY 140
KS3_Sus_scrofa                      MLELVTYEAIVDGGINPASLRGTSTGVVWGVSSSDASEALSRDPETLVGY 129
KS3_Glycine_max                      ENADLAPDNHSDKIKERAGVLVGS GMGLTVFSDGVQALIEKGRHKITPF 66
KS3_Cuphea_hookeriana                -----
KS3_Escherichia_coli_O157_H7        -----EENHTSLMNGGPRKISPF 18
KS4_Iris_x_hollandica                VPKLGKAAASAIKEWGRPKSLITHVVFCTTSGVDMPGADYQLTKLLGLR 149
KS4_Brassica_oleracea_var._cap       VPKLGKAAEKAIKEWQPKSRI THLVFCTTSGVDMPGADYQLTKLLGLC 149
KS4_Pinus_strobus                    VPRLGKAAEKAIKEWQPKSRI THLVFCTTTTTPDLPGADFEVAKLLGLH 149
KS4_Aloe_arborescens                 VPALGKAAALKAIEEWQPLSKI THLVFCTSCGVDMPSADFQLAKLLGLN 149

```

|                                |                                                      |     |
|--------------------------------|------------------------------------------------------|-----|
| KS1_Capsicum_annuum            | -----DITAACSGFLLGLFSA                                | 16  |
| KS1_Arabidopsis_thaliana       | -----DITAACSGFVLGLVSA                                | 16  |
| KS1_Elaeis_oleifera            | -----DATAAYSGFVVLVTA                                 | 16  |
| KS1_Haemophilus_influenzae_Rd  | -----DLAAACTGFVYALSVA                                | 16  |
| KS1_Pseudomonas_aeruginosa     | -----AQCSSLYGLQMA                                    | 13  |
| KS2_Picea_sitchensis           | PRSVYLVDFACFKPSEDELKVSKEEFISLAKKSG-HFDDASLEFQKRILER  | 54  |
| KS2_Tropaeolum_majus           | PRSIYLIDFACYRAHDDLKVTKAEFIEQARKSG-KFDEASLDFQQRILES   | 54  |
| KS2_Arabidopsis_thaliana       | PRTVYLVLDYSCYKPPVTCRVPFSSFMHSRLIL-KDNPKSVEFQMRILER   | 54  |
| KS2_Oryza_sativa_Japonica_Grou | ---VYLVLDYGCFLGEPHRVPFATALEHGRLMTNLLDEESTNFMVRLHAK   | 47  |
| KS2_Zea_mays                   | --PVYLLNYSCHLPDAERQVNLEVCYFGLKCR-RYSDDIADFMRVLVYSK   | 47  |
| KS5_Nibea_mitsukurii           | -----ETFNHKLNTYLESWVGPRDQVRGWLLLDN-YPPTFALT          | 38  |
| KS5_Macaca_fascicularis        | -----PTFICS                                          | 6   |
| KS5_Xenopus_laevis             | -----KDADPRVEDWPLMSSPILQTIIG                         | 24  |
| KS4_Streptomyces_coelicolor    | AKSRVPAVIQRALDDAELLATDIDVIIYVSGTGFMMPSLTAWLINEMGFD   | 86  |
| KS5_Bos_taurus                 | -----EKQFNEAIQWMQENWKKSFLFS                          | 24  |
| KS5_Caenorhabditis_elegans     | -----                                                |     |
|                                |                                                      |     |
| KS3_Mycobacterium_tuberculosis | GYLGNFSMASGRVAYAMRLHGPAITVDTACSSGLTAVHMACRSLHEGES    | 190 |
| KS3_Sus_scrofa                 | SMIGCQRAMMANRLSFFDFKGPSITIDTACSSSLLALQSAYQAIRGGEC    | 179 |
| KS3_Glycine_max                | FIPYAITNMGSAALLGIDLGMGNYSISTACATSNYCFYAAANHIRRGEA    | 116 |
| KS3_Cuphea_hookeriana          | ----STTNMGSAIILAMDGLWGMGNYSISTACATSNFCILNAANHIKGEA   | 46  |
| KS3_Escherichia_coli_O157_H7   | FVPSTIVNMVAGHLTIMYGLRGPSSIATACTSGVHNIGHAARI IAYGDA   | 68  |
| KS4_Iris_x_hollandica          | PSVNRLLMYQQGCFAGGTVLRVAKDLAENNRGARVLVVCSEVTAFTFRGP   | 199 |
| KS4_Brassica_oleracea_var._cap | PSVKRLMMYQQGCFAGATVLRVAKDLAENNRGARVLVVCSEI IALFFRGP  | 199 |
| KS4_Pinus_strobos              | PSVKRVGVGFQHGCFAGGTVLRVAKDLAENNRGARVLVVCSENTAVTFRGP  | 199 |
| KS4_Aloe_arborescens           | TNVNKYCVYMQGCYAGGTVLRVAKDLAENNRGSRVLVVCALETIIGLRGP   | 199 |
| KS1_Capsicum_annuum            | SCYIKAGGFKNVLVIGADAV--SRFIDWTDGRS--CILFGDAGAVLVQA    | 62  |
| KS1_Arabidopsis_thaliana       | ACHIRGGGFKNVLVIGADSL--SRFVDWTDGRG--CILFGDAGAVVVQA    | 62  |
| KS1_Elaeis_oleifera            | TRFIKGGGFQNVLVIGADAL--SRFVDWTDGRG--CILFGDAGAVLVQA    | 62  |
| KS1_Haemophilus_influenzae_Rd  | DQFIRAGKVKKALVIGSDLN--SRKLDETDRST--VVLFGDAGAVVLEA    | 62  |
| KS1_Pseudomonas_aeruginosa     | RQGLIAGLARHVLVVCSEVLE--SKRMDCSRGRNLSILLGDGAGAVVSA    | 61  |
| KS2_Picea_sitchensis           | SGVGDETYLPKAVMGPG LCS-TMKEGRAEAEVMFGALDELFEKTK--VR   | 101 |
| KS2_Tropaeolum_majus           | SGIGDETYIPKSVMSTEVNSSTMSEGRLEATVMFDALDELFEKTK--VR    | 102 |
| KS2_Arabidopsis_thaliana       | SGLGEETCLPPAIHYIPPTP-TMESARNEAQMVI FTAMEDLFKNTG--LK  | 101 |
| KS2_Oryza_sativa_Japonica_Grou | SGIGEETSVPDSFRYIPPE-SLEASREEAE LVI FSAVDKFAAATGLVP   | 96  |
| KS2_Zea_mays                   | SGLGQETFAPPFYISGKFEK-TLAFAIQEAEEGLFAVVEQLLAKSD--VS   | 94  |
| KS5_Nibea_mitsukurii           | VMYLVIVVMGPKYMKHRQPYSCRGLLVLYNLGLTLLSFMFYBELVTAVWH   | 88  |
| KS5_Macaca_fascicularis        | VYLLIVVLGPKYMRNKQPFSCRGILVYVNLGLTLLSVMFYCYELVTGVWE   | 56  |
| KS5_Xenopus_laevis             | AYIYFVTSLGRPRIMENRKPFAKKEIMACYNLFMVLFVSVMCFEFLMSGWA  | 74  |
| KS4_Streptomyces_coelicolor    | STTRQIPIAQLGCAAGGA INRAHDFCTAYPEANALIVACEFCSLCYQPT   | 136 |
| KS5_Bos_taurus                 | ALYAAFVFGGRHLMNKRAKFE LRKPLVLWLSLTAVFVSIFGALRTGAYMVY | 74  |
| KS5_Caenorhabditis_elegans     | --YIATIFGLKYMKDRKAFDLSTPLNIWNGILSTFSLGLFLFTFPTLLS    | 48  |
|                                |                                                      |     |
| KS3_Mycobacterium_tuberculosis | DVALAGGVALMLEPRKAAAGS--ALGMLS-----PTGRCRAFVDAADGFV   | 233 |
| KS3_Sus_scrofa                 | SAAVVGGNLVLLKPNSSLQFM--KLGMLS-----QDGTCSRFD AEGTGYC  | 222 |
| KS3_Glycine_max                | DLMIAGGTEAAI IPIGLGGFV--ACRALSQRNDPKTASRPWDKERDGFV   | 164 |
| KS3_Cuphea_hookeriana          | DMMLCGGSDAAVLPVGLGGFV--ACRALSQRNDPKTASRPWDSNRDGFV    | 94  |
| KS3_Escherichia_coli_O157_H7   | DVMVAGGAEKASTPLGVGGFG--AARALSTRNDNPQAASRPWDKERDGFV   | 116 |
| KS4_Iris_x_hollandica          | SETHLDSLVGQALFSDGAAAM--IIGSDPDVSV-ERPLFQLMYAQQTIVP   | 246 |
| KS4_Brassica_oleracea_var._cap | SDTHLDSLLGQALFSDGAAAL--VVGSDPDISVGEKPIFEMVSAQTILP    | 247 |
| KS4_Pinus_strobos              | SETHLDGLVGLALFSDGASAL--IVGADP-IPQVEKPCFEIVWTAQTIVP   | 246 |
| KS4_Aloe_arborescens           | NESHLDNAIGNSLFSDGAAAL--IVGADP-IVGIEKPIFEIVCAKQTVIP   | 246 |
| KS1_Capsicum_annuum            | CDIIGEDGLFGFDLHSDGDGKR--HLISTFKENETDDASNENHSVT-SFPP  | 109 |
| KS1_Arabidopsis_thaliana       | CDIEDDGLFSFDVHSDGDGRR--HLNASVKESQNDGESSSNGSVFGDFPP   | 110 |
| KS1_Elaeis_oleifera            | CSSEEDGLLGFDFHSDGHGQK--HLNATVKDGETELISNNGAPL--FPP    | 108 |
| KS1_Haemophilus_influenzae_Rd  | S--EQEGIISTHLHASADKNN--ALVLAQPERGIE-----             | 93  |
| KS1_Pseudomonas_aeruginosa     | GESLEDGLLLDLRLGADGNFYD--LLMTAAPGSA SPTFLDEN-----V    | 101 |
| KS2_Picea_sitchensis           | PKDVGILVNCNLSFNPTPSLS--AMIINHYKMRGNILSFNLGGMGCSAGI   | 149 |
| KS2_Tropaeolum_majus           | PKDVGVLVNCNLSFNPTPSLS--AMIINHYKMRGNILSYNLGGMGCSAGI   | 150 |
| KS2_Arabidopsis_thaliana       | PKDIDILIVNCNLSFNPTPSLS--AMIINKYKLRNLIKSYNLGSMGCSASL  | 149 |
| KS2_Oryza_sativa_Japonica_Grou | ADDIGTVILACSF TTPPSLA--DVVVRRYGLRADVRSVNLGSMGCSGAL   | 144 |
| KS2_Zea_mays                   | PSDISVLVACSMFSPMPSLA--SMIMHRFNMRPDVKSYSVAGMGCSAGT    | 142 |
| KS5_Nibea_mitsukurii           | GGYNFYCQDIHSAQE-VDNKI--INVLWVYF SKLIEFMDTFFFILRKN    | 135 |

|                                |                                                      |     |
|--------------------------------|------------------------------------------------------|-----|
| KS5_Macaca_fascicularis        | GKYNFFCQGTRTAGE-SDMKI--IRVLRWYFYSKLIFFMDTFFFILRKN    | 103 |
| KS5_Xenopus_laevis             | TGYSFRCDIVDYSQSPQALRM--AWTCWLFYFSKFIELLDTVFFVLRKKN   | 122 |
| KS4_Streptomyces_coelicolor    | DLGVGSLCNGLFQGDGIAAAV--VRGRGGTGVRLERNGSYLIPKTEDWIM   | 184 |
| KS5_Bos_taurus                 | TVMTKGLKHSVCDQGFYNGPVS-KFWAYAFVLSKAPELGDITIFILRK--   | 121 |
| KS5_Caenorhabditis_elegans     | VIRKDFGSHTYSHVSELYTDTSTSGYWIFLWVLSKIPELLDTPFIVLRK--  | 96  |
| KS3_Mycobacterium_tuberculosis | SGEGCAVVVLKRLPDALADGDRILAVIRGTSANQDGHVTN-----IAT     | 276 |
| KS3_Sus_scrofa                 | RAEAVVAVLLTKK----SLARRVYATILNAGTNTDGSKEQG-----VTF    | 262 |
| KS3_Glycine_max                | MGEAGVLMESLEHAMKRGAPIIAEYLGAVNCDAYHMT-----DPR        | 207 |
| KS3_Cuphea_hookeriana          | MGEAGVLLLLLELEHAKKRGATIIAEFLGGSFTCDAYHMT-----EPH     | 137 |
| KS3_Escherichia_coli_O157_H7   | LDGAGMLVLEEEYEHAKKRGAKIYAELVFGMSSDAYHMT-----SPP      | 159 |
| KS4_Iris_x_hollandica          | DSQGAIDGHLREVGLTFHLLKDVPLISKNIKSLVEAFGPLGIS---DW     | 293 |
| KS4_Brassica_oleracea_var._cap | NSDGAINLQREAGLTFHLLKHVPLISKNIKSLHEAFKPLGIS---DW      | 294 |
| KS4_Pinus_strobus              | NSDGAISGLREVGLTFQKLGAVPDLISTNIEKCLVEAFSOFNIS---DW    | 293 |
| KS4_Aloe_arborescens           | DSEDEVIIHLHLEAGLMFYMSKDSPETISNNVGECLVDIFKSVGMTPPADW  | 296 |
| KS1_Capsicum_annuum            | KCSSSYLQMNQKEIFKFAVRVVPQSIEAALEKAGLDGSN-----         | 149 |
| KS1_Arabidopsis_thaliana       | KQSSYSCIQMNQKEVFRFAVKCVFQSIESALQKAGLPS-----          | 149 |
| KS1_Elaeis_oleifera            | KRSSFSCIQMNQKEVFRFAVKCGFQSIIEAALLEAGLTSS-----        | 147 |
| KS1_Haemophilus_influenzae_Rd_ | -KSGY--IEMQNETFKLAVRELSNVVEETLLANNLDKK-----          | 129 |
| KS1_Pseudomonas_aeruginosa     | LRGGGFEFLMRGRPFMEHASQTLVRIAGEMLAHELTLD-----          | 140 |
| KS2_Picea_sitchensis           | ISLDLARDMLQHP-NSYAIIVVSTEMITFNWYTGAEERSML-----       | 188 |
| KS2_Tropaeolum_majus           | IGVDLARDMLEANP-NNYAVVSTEMVGYNWYPGQDRSML-----         | 189 |
| KS2_Arabidopsis_thaliana       | ISVDVARDLLQVHP-NSNAIIISTEIIITPNYYKNERAML-----        | 188 |
| KS2_Oryza_sativa_Japonica_Grou | IAI GLAKNLLRVAPPGRVLIVATEILSSMLYTGKREML-----         | 184 |
| KS2_Zea_mays                   | VGIDTAARSLRSRRTPGYALVVVTENTSLNWFYFGKKNHML-----       | 182 |
| KS5_Nibea_mitsukurii           | HQITFLHIYHHSASMLNIWWFVMNWVPCGHSYFGASLNSFV-----       | 175 |
| KS5_Macaca_fascicularis        | HQITVLHVYHHSASMLNIWWFVMNWVPCGHSYFGATLNSFI-----       | 143 |
| KS5_Xenopus_laevis             | SQITFLHVYHHSIMPWTWWFVKFAPGGLGTFHALVNCVV-----         | 162 |
| KS4_Streptomyces_coelicolor    | YDVKATGFHFLLDKRVPATMEPLAPALKELAGEHGWDASD-----        | 224 |
| KS5_Bos_taurus                 | QKLI FLHWYHHITVLLYSWYSYKDMVAGGGWFM TMNYSVH-----      | 161 |
| KS5_Caenorhabditis_elegans     | RPLIFMHWYHHALTGYALVCYHEDAVHMVWVVMNYIIH-----          | 136 |
| KS3_Mycobacterium_tuberculosis | PSQPAQVAAYRAALAAGGVDAATVGMVEAHGPGTPIGDPIEYASVSEVYG   | 326 |
| KS3_Sus_scrofa                 | PSGDVQEQILIRSLYAPAGPDPESELYIEAHGTGTQVGDQPELNGIVNALC  | 312 |
| KS3_Glycine_max                | SDGLGVSTCIQSSLEDAGVSPPEVNYINAHATSTLAGDLAEINAIKKVKF   | 257 |
| KS3_Cuphea_hookeriana          | PEGAGVILCIEKALAQSGVSRREDVNYINAHATSTPAGDIKEYQALAHCFG  | 187 |
| KS3_Escherichia_coli_O157_H7   | ENGAGAALAMANALRDAGIEASQIGYVNAHGTSTPAGDKAEQAVKTIFG    | 209 |
| KS4_Iris_x_hollandica          | NSIFWVAHPGGPAILDAVEDKLGLEKAKMGATREVLKEYGNMSSACVIFI   | 343 |
| KS4_Brassica_oleracea_var._cap | NSLFWIAHPGGRAILDEVEKLLGLKAEKMRATRHVLSEYGNMSTACVLF    | 344 |
| KS4_Pinus_strobus              | NQLFWIAHPGGHAILDQVEASLNDPTKLRATRHVMSEYGNMSSACVHFI    | 343 |
| KS4_Aloe_arborescens           | NSLFWIHPGGRAILDEVEARLKLPEKFRATRHVLWEYGNMVSACVLYI     | 346 |
| KS1_Capsicum_annuum            | NFDWLLHQANQRRIIDGIATRLVPSERVISN---LANYGN TSAAS IPLA  | 196 |
| KS1_Arabidopsis_thaliana       | AIDWLLHQANQRRIIDSVATRLHFPPERVISN---LANYGN TSAAS IPLA | 196 |
| KS1_Elaeis_oleifera            | SIDWLLHQANQRRIIDAVATRLQMPNKNVISN---LANYGN TSAAS IPLA | 194 |
| KS1_Haemophilus_influenzae_Rd_ | LDLWLVPHQANLRIITATAKLEMDMSQVVVT---LDKYANNSAATVPVA    | 176 |
| KS1_Pseudomonas_aeruginosa     | DIDHVICHQPNLRLILDVQEQLGIPQHKFAVT---VDRLGNMASASTPVT   | 187 |
| KS2_Picea_sitchensis           | MPNCFFRMGGAAILLSNKRDRRRRAKYSLSHIVRTHKGADDRSFRVCVYQQ  | 238 |
| KS2_Tropaeolum_majus           | IPNCYFRMGCSAVLLSNRRGDYRAKYSLQHLVRTHKGADDRSFRCIYQE    | 239 |
| KS2_Arabidopsis_thaliana       | LPNCLFRMGGAAILLSNRRSDRWRAKYKLCHELVTRHKGADDSYNCVMEQ   | 238 |
| KS2_Oryza_sativa_Japonica_Grou | VPNVLFRMGAAAIIMSNSPE---KARFRLGPVIRTLTAARDGDYRCAFQE   | 231 |
| KS2_Zea_mays                   | VTNCIFRVGSAAALVTDVPSRRPDAKYELVRLTRTHHGADDAAFNAALQM   | 232 |
| KS5_Nibea_mitsukurii           | -HVMYSYYGLSAI-PAMRPYLWKKRYITQLQLVQFFLTMSQTMCAVWVP    | 223 |
| KS5_Macaca_fascicularis        | -HVLMSYYGLSSV-PSMRPYLWKKYITQGLLQFVLTIIQTSCGVIWP      | 191 |
| KS5_Xenopus_laevis             | -HVIMYSYYGLSALGPAYQKYLWKKYMTSIQLTQFLM-----           | 199 |
| KS4_Streptomyces_coelicolor    | -LDFYIVHAGGPRILDDLSTFLEVDPHAFRESRATLTEYGNIASAVVLDA   | 273 |
| KS5_Bos_taurus                 | --SVMYSYYALRAAGFRVSRKFAMFITLSQIIQMLIGCVINYLVFQWMQH   | 209 |
| KS5_Caenorhabditis_elegans     | --AFMYGYLLKSLKVPPIPPSVAQAITTSQMVQFAVAIFAQVHVSYKHYV   | 184 |
| KS3_Mycobacterium_tuberculosis | VDG--P-CALASVKTNFGHTQSTAGVLGLIKVVLALKHGVVPRNLH----   | 369 |
| KS3_Sus_scrofa                 | ATRREP-LLIGSTKSNMGHPEPASGVAALIKVLLSLEHGVAWPNLH----   | 357 |
| KS3_Glycine_max                | DTSG---IKINATKSMIGHCLGAGGLEAIATVKAITTGWLHPTIN----    | 300 |
| KS3_Cuphea_hookeriana          | QNSE---LRVNSTKSMIGHLLGAGGVEAVAVVQAIRTGWI-----        | 225 |
| KS3_Escherichia_coli_O157_H7   | EAA--RVLVSTKSMGTGHLGAGAVESIYSILALRDQAVPPTIN----      | 253 |
