# Supplementary material
Source: PubMed Central journal article supplement (PMC3218358)
Supplement: pro0020-1659-SD4.pdf [file pro0020-1659-SD4.pdf]

**Table S1A.** Average and Standard Deviations of the JTT Distances, along with z-Values (in parentheses) within and between KSI Subfamilies

| Subfamilies | 1A                | 1B                | 1C                | 1D                | 1E                | 1F             | 1G        | 1H | 1I | 1J | 1K | 1L |
|-------------|-------------------|-------------------|-------------------|-------------------|-------------------|----------------|-----------|----|----|----|----|----|
| 1A          | 0.64±0.21<br>—    |                   |                   |                   |                   |                |           |    |    |    |    |    |
| 1B          | 0.82±0.19<br>4.91 | 0.71±0.31<br>—    |                   |                   |                   |                |           |    |    |    |    |    |
| 1C          | 1.01±0.11<br>14.2 | 1.03±0.16<br>9.92 | 0.61±0.25<br>—    |                   |                   |                |           |    |    |    |    |    |
| 1D          | 1.14±0.10<br>25.9 | 1.13±0.12<br>15.0 | 1.17±0.12<br>19.1 | 0.58±0.18<br>—    |                   |                |           |    |    |    |    |    |
| 1E          | 1.15±0.17<br>11.3 | 1.18±0.19<br>7.85 | 1.24±0.21<br>11.4 | 1.30±0.21<br>15.7 | 1.12±0.35<br>—    |                |           |    |    |    |    |    |
| 1F          | 1.01±0.13<br>11.6 | 1.06±0.15<br>7.64 | 1.06±0.18<br>9.64 | 1.12±0.14<br>15.5 | 1.20±0.22<br>6.38 | 0.94±0.25<br>— |           |    |    |    |    |    |
| 1G          | 1.03±0.12         | 1.08±0.15         | 1.21±0.14         | 1.24±0.13         | 1.31±0.20         | 1.14±0.15      | 0.66±0.30 |    |    |    |    |    |

|    |             |             |             |             |             |             |             |             |             |             |             |           |
|----|-------------|-------------|-------------|-------------|-------------|-------------|-------------|-------------|-------------|-------------|-------------|-----------|
|    | <i>7.94</i> | <i>7.41</i> | <i>10.9</i> | <i>12.4</i> | <i>8.13</i> | <i>6.93</i> | —           |             |             |             |             |           |
| 1H | 1.46±0.45   | 1.49±0.46   | 1.50±0.48   | 1.58±0.42   | 1.76±0.56   | 1.53±0.49   | 1.63±0.46   | 1.61±0.50   |             |             |             |           |
|    | <i>4.89</i> | <i>4.36</i> | <i>5.11</i> | <i>6.74</i> | <i>5.48</i> | <i>3.67</i> | <i>5.50</i> | —           |             |             |             |           |
| 1I | 1.14±0.16   | 1.16±0.19   | 1.11±0.22   | 1.30±0.19   | 1.35±0.23   | 1.18±0.21   | 1.32±0.17   | 1.66±0.48   | 1.03±0.38   |             |             |           |
|    | <i>8.94</i> | <i>6.84</i> | <i>6.82</i> | <i>13.1</i> | <i>7.06</i> | <i>5.31</i> | <i>8.33</i> | <i>4.30</i> | —           |             |             |           |
| 1J | 1.57±0.23   | 1.58±0.24   | 1.54±0.23   | 1.67±0.22   | 1.72±0.29   | 1.55±0.25   | 1.66±0.21   | 1.99±0.44   | 1.61±0.28   | 1.66±0.48   |             |           |
|    | <i>11.3</i> | <i>8.82</i> | <i>9.24</i> | <i>13.8</i> | <i>7.78</i> | <i>6.52</i> | <i>8.50</i> | <i>4.64</i> | <i>5.45</i> | —           |             |           |
| 1K | 1.44±0.23   | 1.46±0.24   | 1.47±0.25   | 1.53±0.21   | 1.62±0.28   | 1.48±0.28   | 1.56±0.18   | 1.88±0.43   | 1.54±0.29   | 1.85±0.26   | 1.47±0.54   |           |
|    | <i>9.69</i> | <i>7.78</i> | <i>9.24</i> | <i>11.9</i> | <i>7.24</i> | <i>6.49</i> | <i>8.18</i> | <i>4.31</i> | <i>5.67</i> | <i>5.46</i> | —           |           |
| 1L | 1.66±0.28   | 1.66±0.26   | 1.73±0.27   | 1.83±0.27   | 1.84±0.29   | 1.72±0.28   | 1.76±0.28   | 2.06±0.43   | 1.81±0.28   | 2.07±0.30   | 2.00±0.31   | 1.85±0.49 |
|    | <i>11.3</i> | <i>8.44</i> | <i>11.3</i> | <i>15.4</i> | <i>8.70</i> | <i>8.60</i> | <i>8.52</i> | <i>4.30</i> | <i>7.77</i> | <i>6.27</i> | <i>6.45</i> | —         |

---

**Table S1B.** Average and Standard Deviations of the JTT Distances, along with z-Values (in parentheses), within and between KS2 Subfamilies

| Subfamilies | 2A                | 2B                | 2C                | 2D                | 2E                | 2F             | 2G        | 2H | 2I | 2J |
|-------------|-------------------|-------------------|-------------------|-------------------|-------------------|----------------|-----------|----|----|----|
| 2A          | 0.20±0.18<br>—    |                   |                   |                   |                   |                |           |    |    |    |
| 2B          | 0.53±0.07<br>8.48 | 0.28±0.10<br>—    |                   |                   |                   |                |           |    |    |    |
| 2C          | 0.60±0.04<br>11.5 | 0.44±0.06<br>6.58 | 0.28±0.09<br>—    |                   |                   |                |           |    |    |    |
| 2D          | 0.81±0.06<br>11.4 | 0.60±0.10<br>6.31 | 0.62±0.09<br>7.40 | 0.37±0.22<br>—    |                   |                |           |    |    |    |
| 2E          | 0.71±0.05<br>9.33 | 0.56±0.07<br>5.56 | 0.50±0.08<br>4.39 | 0.68±0.11<br>5.69 | 0.38±0.19<br>—    |                |           |    |    |    |
| 2F          | 0.68±0.03<br>14.1 | 0.49±0.06<br>8.63 | 0.53±0.05<br>11.5 | 0.69±0.09<br>9.30 | 0.63±0.05<br>8.26 | 0.21±0.10<br>— |           |    |    |    |
| 2G          | 0.99±0.11         | 0.90±0.09         | 0.93±0.11         | 1.00±0.09         | 0.95±0.08         | 0.82±0.10      | 0.81±0.31 |    |    |    |

|    |             |             |             |             |             |             |             |             |             |           |
|----|-------------|-------------|-------------|-------------|-------------|-------------|-------------|-------------|-------------|-----------|
|    | <i>6.83</i> | <i>5.17</i> | <i>5.84</i> | <i>5.46</i> | <i>4.77</i> | <i>4.53</i> | —           |             |             |           |
| 2H | 0.92±0.08   | 0.77±0.13   | 0.83±0.13   | 0.95±0.12   | 0.86±0.12   | 0.61±0.13   | 1.00±0.10   | 0.47±0.21   |             |           |
|    | <i>12.6</i> | <i>9.05</i> | <i>11.0</i> | <i>9.90</i> | <i>8.25</i> | <i>5.96</i> | <i>4.84</i> | —           |             |           |
| 2I | 1.11±0.11   | 1.06±0.17   | 1.03±0.15   | 1.15±0.15   | 1.03±0.17   | 1.04±0.15   | 1.27±0.17   | 1.22±0.17   | 1.11±0.35   |           |
|    | <i>5.71</i> | <i>4.55</i> | <i>4.33</i> | <i>4.84</i> | <i>3.30</i> | <i>4.82</i> | <i>3.06</i> | <i>5.08</i> | —           |           |
| 2J | 1.21±0.11   | 1.18±0.11   | 1.15±0.10   | 1.21±0.10   | 1.11±0.10   | 1.20±0.08   | 1.35±0.11   | 1.28±0.12   | 1.42±0.14   | 0.77±0.33 |
|    | <i>13.1</i> | <i>12.6</i> | <i>12.6</i> | <i>10.6</i> | <i>9.00</i> | <i>13.7</i> | <i>6.93</i> | <i>10.8</i> | <i>11.3</i> | —         |

---

**Table S1C.** Average and Standard Deviations of the JTT Distances, along with z-Values (in parentheses), within and between KS4 Subfamilies

| Subfamilies | 4A                | 4B                | 4C                | 4D                | 4E                | 4F             | 4G        | 4H | 4I | 4J |
|-------------|-------------------|-------------------|-------------------|-------------------|-------------------|----------------|-----------|----|----|----|
| 4A          | 0.29±0.19<br>—    |                   |                   |                   |                   |                |           |    |    |    |
| 4B          | 1.13±0.06<br>37.5 | 0.37±0.19<br>—    |                   |                   |                   |                |           |    |    |    |
| 4C          | 1.52±0.11<br>20.4 | 1.67±0.11<br>20.2 | 1.14±0.25<br>—    |                   |                   |                |           |    |    |    |
| 4D          | 1.55±0.08<br>9.02 | 1.66±0.08<br>9.41 | 1.44±0.11<br>4.47 | 0.57±0.50<br>—    |                   |                |           |    |    |    |
| 4E          | 1.62±0.13<br>11.6 | 1.70±0.13<br>11.7 | 1.63±0.16<br>6.36 | 1.75±0.15<br>6.73 | 0.84±0.39<br>—    |                |           |    |    |    |
| 4F          | 1.72±0.13<br>5.35 | 2.01±0.13<br>6.75 | 1.71±0.15<br>2.70 | 1.71±0.12<br>3.57 | 1.92±0.17<br>4.29 | 1.31±0.55<br>— |           |    |    |    |
| 4G          | 1.63±0.09         | 1.81±0.08         | 1.68±0.13         | 1.69±0.11         | 1.97±0.15         | 1.84±0.12      | 0.68±0.36 |    |    |    |

|    |             |             |             |             |             |             |             |             |             |           |
|----|-------------|-------------|-------------|-------------|-------------|-------------|-------------|-------------|-------------|-----------|
|    | <i>17.4</i> | <i>18.7</i> | <i>9.89</i> | <i>7.55</i> | <i>10.7</i> | <i>4.59</i> | —           |             |             |           |
| 4H | 1.63±0.10   | 1.73±0.09   | 1.66±0.10   | 1.75±0.09   | 1.93±0.17   | 1.70±0.12   | 1.57±0.08   | 0.37±0.05   |             |           |
|    | <i>84.3</i> | <i>52.0</i> | <i>20.7</i> | <i>10.2</i> | <i>13.8</i> | <i>4.92</i> | <i>15.4</i> | —           |             |           |
| 4I | 1.68±0.15   | 1.79±0.13   | 1.62±0.16   | 1.70±0.13   | 1.86±0.15   | 1.71±0.17   | 1.50±0.09   | 1.43±0.10   | 0.70±0.21   |           |
|    | <i>28.9</i> | <i>26.7</i> | <i>11.8</i> | <i>8.09</i> | <i>10.8</i> | <i>3.91</i> | <i>10.4</i> | <i>19.6</i> | —           |           |
| 4J | 1.69±0.11   | 1.76±0.12   | 1.60±0.15   | 1.65±0.13   | 1.81±0.18   | 1.78±0.17   | 1.56±0.11   | 1.41±0.11   | 1.26±0.11   | 1.04±0.34 |
|    | <i>17.5</i> | <i>16.9</i> | <i>7.11</i> | <i>6.09</i> | <i>7.87</i> | <i>3.28</i> | <i>7.93</i> | <i>11.5</i> | <i>5.46</i> | —         |

---

**Table S1D.** Average and Standard Deviations of the JTT Distances, along with z-Values (in parentheses), within and between KS5 Subfamilies

| Subfamilies | 5A                | 5B                | 5C                | 5D                | 5E                | 5F             | 5G | 5H | 5I | 5J | 5K |
|-------------|-------------------|-------------------|-------------------|-------------------|-------------------|----------------|----|----|----|----|----|
| 5A          | 1.18±0.31<br>—    |                   |                   |                   |                   |                |    |    |    |    |    |
| 5B          | 1.49±0.17<br>7.78 | 0.95±0.27<br>—    |                   |                   |                   |                |    |    |    |    |    |
| 5C          | 1.32±0.20<br>9.24 | 1.20±0.13<br>7.98 | 0.49±0.27<br>—    |                   |                   |                |    |    |    |    |    |
| 5D          | 1.26±0.18<br>6.45 | 1.25±0.12<br>7.45 | 0.86±0.11<br>5.04 | 0.62±0.28<br>—    |                   |                |    |    |    |    |    |
| 5E          | 1.36±0.20<br>13.0 | 1.20±0.14<br>9.75 | 0.76±0.13<br>6.28 | 0.85±0.10<br>6.26 | 0.41±0.20<br>—    |                |    |    |    |    |    |
| 5F          | 1.45±0.20<br>9.79 | 1.45±0.20<br>8.07 | 0.98±0.16<br>6.79 | 1.06±0.11<br>6.94 | 1.08±0.14<br>10.2 | 0.61±0.32<br>— |    |    |    |    |    |

|    |             |             |             |             |             |             |             |             |             |             |           |
|----|-------------|-------------|-------------|-------------|-------------|-------------|-------------|-------------|-------------|-------------|-----------|
| 5G | 1.46±0.14   | 1.35±0.12   | 1.06±0.12   | 1.21±0.09   | 1.18±0.11   | 0.97±0.16   | 0.42±0.25   |             |             |             |           |
|    | <i>15.6</i> | <i>12.6</i> | <i>12.2</i> | <i>13.0</i> | <i>18.7</i> | <i>8.30</i> | —           |             |             |             |           |
| 5H | 1.78±0.20   | 1.72±0.19   | 1.43±0.12   | 1.54±0.15   | 1.59±0.17   | 1.43±0.10   | 1.34±0.11   | 1.10±0.37   |             |             |           |
|    | <i>7.38</i> | <i>7.46</i> | <i>7.13</i> | <i>7.36</i> | <i>9.66</i> | <i>6.25</i> | <i>6.91</i> | —           |             |             |           |
| 5I | 1.85±0.22   | 1.81±0.18   | 1.58±0.20   | 1.71±0.16   | 1.63±0.15   | 1.62±0.14   | 1.63±0.10   | 1.62±0.15   | 0.71±0.25   |             |           |
|    | <i>10.3</i> | <i>10.4</i> | <i>10.5</i> | <i>11.1</i> | <i>12.3</i> | <i>10.2</i> | <i>12.4</i> | <i>6.18</i> | —           |             |           |
| 5J | 1.84±0.17   | 1.91±0.15   | 1.77±0.15   | 1.85±0.15   | 1.99±0.16   | 1.81±0.16   | 1.77±0.13   | 1.79±0.17   | 1.87±0.13   | 0.62±0.22   |           |
|    | <i>24.5</i> | <i>22.6</i> | <i>26.2</i> | <i>24.5</i> | <i>39.5</i> | <i>23.0</i> | <i>34.5</i> | <i>11.3</i> | <i>14.4</i> | —           |           |
| 5K | 2.04±0.18   | 2.12±0.20   | 1.80±0.18   | 1.93±0.17   | 2.07±0.18   | 1.92±0.17   | 1.96±0.16   | 2.06±0.21   | 1.92±0.20   | 1.92±0.17   | 1.24±0.35 |
|    | <i>19.4</i> | <i>19.2</i> | <i>18.6</i> | <i>18.7</i> | <i>29.7</i> | <i>18.1</i> | <i>27.6</i> | <i>10.5</i> | <i>10.9</i> | <i>27.1</i> | —         |

---
