# Supplementary material
Source: PubMed Central journal article supplement (PMC3218358)
Supplement: pro0020-1659-SD6.pdf [file pro0020-1659-SD6.pdf]

KS3 Group 3A

| Sequence       | Distance | Sequence       | Distance | Sequence       | Distance |
|----------------|----------|----------------|----------|----------------|----------|
| ZP_05517699.1  | 0.06999  | BAH67106.1     | 0.05131  | BAH67602.1     | 0.16383  |
| BAH67370.1     | 0.12723  | ACZ54305.1     | 0.14903  | BAH66979.1     | 0.11763  |
| BAH67532.1     | 0.08887  | ZP_05519879.1  | 0.14848  | BAH67529.1     | 0.20855  |
| BAH68114.1     | 0.13251  | BAH67496.1     | 0.02967  | BAH67498.1     | 0.05744  |
| ZP_04711974.1  | 1.40E-04 | ZP_04696781.1  | 1.40E-04 | BAH68050.1     | 0.06071  |
| BAH67740.1     | 0.11595  | BAH67589.1     | 0.19836  | ZP_06711000.1  | 0.0925   |
| ZP_06710999.1  | 0.08986  | BAH67630.1     | 0.08667  | BAH67631.1     | 0.11709  |
| ADI06300.1     | 0.33713  | BAH67426.1     | 0.05933  | AAQ84144.1     | 0.01132  |
| YP_003512879.1 | 0.27989  | YP_003512878.1 | 0.20051  | YP_003512877.1 | 0.29434  |
| BAC57032.1     | 0.21738  | ABB52545.1     | 0        | ZP_05001884.1  | 0        |
| AAS79463.1     | 0.00822  | ABY21542.1     | 0.18706  | AAB66508.1     | 0.12883  |
| ZP_05512308.1  | 0.25878  | BAH68307.1     | 0.31478  | AAQ84147.1     | 0.2516   |
| AAC46027.1     | 0.11078  | BAH67034.1     | 0.01296  | BAH67154.1     | 0.02089  |
| BAH67035.1     | 0.0071   | BAH67153.1     | 0.03564  | BAH67257.1     | 0.05089  |
| AAC46028.1     | 0.12328  | BAH67036.1     | 1.60E-04 | BAH67142.1     | 0.00945  |
| BAH67144.1     | 0.08216  | BAH67143.1     | 1.60E-04 | BAH67155.1     | 0.02785  |
| BAH67258.1     | 0.09451  | BAH66922.1     | 0.01095  | AAC46025.1     | 0.03332  |
| BAH66923.1     | 0.09946  | BAH66924.1     | 0.05131  | YP_712782.1    | 0.13437  |
| AAL07759.1     | 0.17377  | ACZ54336.1     | 0.12904  | ACY06286.1     | 0.28856  |
| YP_003450268.1 | 0.23519  | YP_003493456.1 | 0.13055  | YP_048719.1    | 0.15114  |
| ZP_04589972.1  | 0.00269  | NP_794436.1    | 1.50E-04 | AAD03048.1     | 0.01741  |
| ZP_06483082.1  | 1.50E-04 | YP_001508186.1 | 0.0278   | ZP_06416311.1  | 0.07966  |
| BAF85837.1     | 0.21113  | BAH67557.1     | 0.13804  | BAH67456.1     | 0.12198  |
| ABB05102.1     | 0.23182  | AAQ84156.1     | 0.26966  | BAH67107.1     | 0.05638  |
| BAH67441.1     | 0.05248  | BAH67301.1     | 0.043    | BAH66936.1     | 0.03295  |
| BAH67924.1     | 0.00305  | BAH67908.1     | 1.40E-04 | BAH67834.1     | 0.00304  |
| BAH67753.1     | 0        | BAH67837.1     | 0        | BAH67843.1     | 0        |
| AAAY57523.1    | 0        | ZP_04700405.1  | 0        | BAH67310.1     | 0.14195  |
| BAH67039.1     | 0.2422   | ACZ54318.1     | 0.24531  | ACZ54317.1     | 0.08242  |
| BAH67255.1     | 0.00477  | BAH66977.1     | 0.01554  | BAH67299.1     | 0.01252  |
| BAH67412.1     | 0.00623  | BAH67000.1     | 1.40E-04 | BAH67001.1     | 0.00309  |
| YP_003648399.1 | 0.38291  | YP_003648398.1 | 0.37906  | BAH67452.1     | 0.23332  |
| ACR61384.1     | 0.00998  | ACR61386.1     | 0.00489  | ACR61382.1     | 0.00561  |
| ACX31694.1     | 0        | ACX31702.1     | 0        | ACX31697.1     | 0.00464  |
| ACN13118.1     | 1.40E-04 | ACN13119.1     | 0        | ACR61385.1     | 0        |
| ACX31709.1     | 0.00464  | ACX31701.1     | 1.40E-04 | ADE08338.1     | 0.00464  |
| ACN13121.1     | 0.00477  | ACR61383.1     | 1.40E-04 | YP_888785.1    | 0.12746  |
| NP_216898.1    | 0        | NP_336931.1    | 0        | ZP_06800203.1  | 0.00272  |
| YP_640631.1    | 0.00547  | YP_001071748.1 | 1.50E-04 | YP_954634.1    | 0.1566   |
| ZP_04747689.1  | 0.17192  | ZP_06852164.1  | 0.05998  | ZP_05216252.1  | 0.00823  |
| ZP_05226626.1  | 0.0055   | NP_961109.1    | 0.00831  | YP_881230.1    | 0.00274  |
| YP_001133959.1 | 0.2168   | YP_003649222.1 | 0.3947   | YP_003271856.1 | 0.2536   |

KS3 Group 3A

|                |          |                |          |                |          |
|----------------|----------|----------------|----------|----------------|----------|
| YP_001702855.1 | 0.20116  | ZP_04748585.1  | 0.12798  | YP_001851965.1 | 0.00166  |
| YP_907241.1    | 0.00392  | YP_116973.1    | 0.19146  | ACZ54284.1     | 0.31624  |
| ACZ54335.1     | 0.28     | ZP_05529780.1  | 0.49961  | ACZ54319.1     | 0.15684  |
| BAH67210.1     | 0.04189  | BAH67464.1     | 0.05273  | BAH67176.1     | 0.02945  |
| BAH67806.1     | 0.04448  | ADI03828.1     | 0.01093  | ADC45515.1     | 0.01531  |
| BAH66937.1     | 0.14454  | pdb2HG4A       | 0.11563  | ADI11520.1     | 0        |
| AAP42872.1     | 0        | ZP_06574377.1  | 0        | ZP_04683624.1  | 0        |
| YP_001848424.1 | 0.5207   | ZP_04696759.1  | 0        | ZP_06587679.1  | 0        |
| ZP_04711951.1  | 0        | NP_851457.1    | 0.1014   | AAU93807.2     | 0.20438  |
| AAG13917.1     | 0.08547  | YP_001102988.1 | 0        | spQ03131.1     | 0        |
| ZP_06567595.1  | 0        | AAV39550.1     | 1.30E-04 | YP_003102283.1 | 0.10909  |
| ZP_06773938.1  | 1.40E-04 | ZP_05007821.1  | 1.40E-04 | ZP_04333100.1  | 0.27919  |
| AAO65790.1     | 0.3427   | ABC84465.1     | 0.08982  | ZP_05520494.1  | 0.10331  |
| ZP_04333099.1  | 0        | ADH65943.1     | 0        | BAH66938.1     | 0.20305  |
| pdb2QO3A       | 0.11179  | YP_003450267.1 | 0.28708  | YP_003493455.1 | 0.15858  |
| YP_048720.1    | 0.08196  | ZP_04589079.1  | 1.40E-04 | NP_794435.1    | 1.40E-04 |
| AAD03047.1     | 1.40E-04 | ZP_06483087.1  | 1.60E-04 | ZP_06459851.1  | 1.40E-04 |
| ZP_05480317.1  | 0.43935  | BAH67118.1     | 0.22476  | BAH67037.1     | 0.21279  |
| YP_003512876.1 | 0.19192  | BAH67475.1     | 0.21467  | BAH67650.1     | 0.13309  |
| BAH66931.1     | 0.07674  | BAH67272.1     | 1.60E-04 | BAH67271.1     | 0.00307  |
| BAH67717.1     | 0.03453  | BAH67327.1     | 0.01577  | BAH67296.1     | 0.00975  |
| BAE93728.1     | 0.16451  | CAI30443.1     | 0.24512  | BAH67330.1     | 0.17954  |
| BAH67855.1     | 0.01172  | ZP_05519893.1  | 0.00791  | BAH67474.1     | 0.16709  |
| ZP_05519889.1  | 0.05397  | ACO94484.1     | 0.06634  | BAH67361.1     | 0.08461  |
| BAH67899.1     | 0.00715  | BAH67856.1     | 0.00219  | ZP_05519891.1  | 0.00315  |
| BAH68144.1     | 0.00963  | BAH68148.1     | 0.01281  | ACR61387.1     | 1.50E-04 |
| ACN13114.1     | 1.40E-04 | BAH67599.1     | 0.02506  | BAH67495.1     | 0.01689  |
| BAH68254.1     | 0.01902  | BAH68036.1     | 0.01885  | BAH68032.1     | 0.00311  |
| BAH68043.1     | 0.03549  | ADB23403.1     | 0.14151  | YP_003300364.1 | 0.24789  |
| ACZ54351.1     | 0.15761  | BAH67267.1     | 0.03522  | BAH67268.1     | 0.00302  |
| BAH67269.1     | 0.01908  | BAH67807.1     | 0.1266   | BAH67211.1     | 0.10643  |
| BAH67808.1     | 0.05276  | AAB66507.1     | 0.15625  | ABY21541.1     | 0.05106  |
| BAC57031.1     | 0.15929  | AAS79462.1     | 0.02706  | ZP_05001885.1  | 0.00274  |
| ABB52544.1     | 0.00269  | BAH66927.1     | 1.40E-04 | AAC69331.1     | 0.01178  |
| BAH66928.1     | 0.11311  | BAH66929.1     | 0.03516  | BAH67214.1     | 0.03758  |
| ACZ54316.1     | 0.26642  | ZP_05529788.1  | 0.03192  | ZP_05529767.1  | 0.08393  |
| BAH67861.1     | 0.22616  | ACS45097.1     | 0.1031   | ACS45087.1     | 0.08811  |
| ACS36475.1     | 0.04351  | BAH68306.1     | 0.12621  | BAH68304.1     | 0.05632  |
| BAH68305.1     | 0.05032  | ACS45081.1     | 0.06019  | ACS45092.1     | 0.06912  |
| BAH68262.1     | 0.17336  | ZP_06275956.1  | 0.1936   | BAH68269.1     | 0.23357  |
| BAH68260.1     | 0.12786  | BAH67526.1     | 0.03705  | BAD27470.1     | 0.06334  |
| BAH67512.1     | 1.50E-04 | ABI93779.1     | 0.22679  | ZP_05512310.1  | 0.1434   |
| ZP_05512311.1  | 0.03376  | ZP_05512312.1  | 0.08784  | BAH68215.1     | 0.01737  |

KS3 Group 3A

|               |          |               |          |               |          |
|---------------|----------|---------------|----------|---------------|----------|
| BAH67769.1    | 0.0248   | AAK73503.1    | 0.08995  | ABV83223.1    | 0.11281  |
| AAF71768.1    | 0.05714  | BAH57741.1    | 0.20407  | BAH67836.1    | 0        |
| BAH67237.1    | 0        | ZP_04700408.1 | 1.50E-04 | BAH67918.1    | 0.01209  |
| BAH67754.1    | 0.00907  | BAH67833.1    | 0.00907  | BAH67895.1    | 0        |
| BAH67841.1    | 0        | BAH67450.1    | 0.09188  | BAH67368.1    | 0.03735  |
| ZP_04700407.1 | 0.02994  | BAH67770.1    | 0.00729  | BAH68217.1    | 0.01397  |
| BAH67698.1    | 0.00703  | BAH67449.1    | 0.09865  | BAH67305.1    | 0.0094   |
| BAH67304.1    | 0.00314  | BAH68034.1    | 0.08699  | BAH67756.1    | 0.01518  |
| BAH67922.1    | 1.50E-04 | BAH67414.1    | 0.16929  | AAZ93570.1    | 0.08943  |
| CAC20919.1    | 0.09342  | BAH67424.1    | 0.08417  | BAH67366.1    | 0.01219  |
| BAH67757.1    | 1.40E-04 | AAQ82566.1    | 0        | ZP_04700406.1 | 0        |
| BAH67767.1    | 1.40E-04 | ADI05106.1    | 0.19644  | BAH57742.1    | 0.17431  |
| ZP_04700411.1 | 0.11736  | BAH67481.1    | 0.06618  | ZP_05512309.1 | 0.2196   |
| ABV83228.1    | 0.21785  | AAK73512.1    | 0.16309  | AAF71774.1    | 0.06632  |
| BAH67406.1    | 0.15096  | BAH67416.1    | 0.04274  | BAH67814.1    | 0.02678  |
| BAH67470.1    | 0.03054  | CAC20920.1    | 0.00956  | BAH67245.1    | 0.04097  |
| BAH67265.1    | 0.08413  | BAH67369.1    | 0.05089  | BAH67850.1    | 0.06956  |
| BAH67075.1    | 0.19697  | BAH67006.1    | 0.1664   | ADI11519.1    | 0        |
| AAP42873.1    | 0        | BAH67689.1    | 0.0079   | BAH67973.1    | 0.01251  |
| BAH67939.1    | 0.00614  | BAH68292.1    | 0.23075  | BAH67921.1    | 0.14926  |
| ADC68469.1    | 0.29653  | ZP_06283109.1 | 0.21241  | ABC87512.1    | 0.12412  |
| AAG23265.1    | 0.18923  | BAH67232.1    | 0.04541  | BAH67335.1    | 0.04047  |
| ADC68491.1    | 0.20342  | BAH67758.1    | 0.0067   | ZP_04700403.1 | 0        |
| ZP_06589189.1 | 0        | BAH67266.1    | 0.04795  | BAH67440.1    | 0.08099  |
| BAH67413.1    | 0.05315  | BAH67425.1    | 0.11212  | BAH67311.1    | 1.40E-04 |
| BAH67281.1    | 0.00307  | BAH68069.1    | 0.18958  | ZP_06217035.1 | 0.14419  |
| ACZ54334.1    | 0.19934  | ZP_05000639.1 | 0.18818  | BAH67146.1    | 0.19113  |
| BAH67145.1    | 0.14688  | ZP_05517701.1 | 0.02284  | BAH68134.1    | 0.03487  |
| BAH67389.1    | 0.09751  | BAH68068.1    | 0.10494  | BAH67056.1    | 0.02477  |
| BAH67858.1    | 0.00309  | ZP_05517703.1 | 1.50E-04 | ZP_05517705.1 | 0.16779  |
| BAH68067.1    | 0.07074  | BAH67390.1    | 0.06738  | BAH67201.1    | 0.07749  |
| ZP_05517711.1 | 0.04696  | BAH67109.1    | 0.09471  | BAH67059.1    | 0.02148  |
| BAH66987.1    | 0.02271  | BAH67163.1    | 0.0397   | BAH67058.1    | 0.00834  |
| BAH67387.1    | 0.23261  | BAH67391.1    | 0.06686  | BAH67911.1    | 0.03903  |
| ZP_05517713.1 | 0.01634  | AAX98187.1    | 0.03105  | ZP_05000629.1 | 0.03387  |
| BAH67057.1    | 0.10507  | BAH68062.1    | 0.06313  | ZP_04683623.1 | 0.02064  |
| CAQ64691.1    | 0        | BAG85031.1    | 0        | BAH67090.1    | 0.19251  |
| ZP_06397564.1 | 0.19641  | BAH67117.1    | 0.04757  | BAH67346.1    | 0.07514  |
| ZP_06221112.1 | 0.16245  | ADC68437.1    | 0.08155  | BAH67646.1    | 0.0307   |
| BAH67983.1    | 0.20331  | ADC68502.1    | 0.2784   | ADC68494.1    | 1.50E-04 |
| ADC68462.1    | 0.02256  | ADC68467.1    | 0.17463  | BAH67486.1    | 0.03556  |
| BAH67471.1    | 0.07643  | BAH66982.1    | 0.06866  | ZP_04700412.1 | 0.1059   |
| BAH67448.1    | 0.06649  | ADC68461.1    | 0.16144  | ZP_04604292.1 | 0.24484  |

KS3 Group 3A

|               |          |                |          |               |          |
|---------------|----------|----------------|----------|---------------|----------|
| ZP_05511740.1 | 0.15866  | ADC68464.1     | 0.12108  | BAH02271.1    | 0.2453   |
| ABB88536.1    | 0.17149  | YP_001106332.1 | 0        | ZP_06568061.1 | 0        |
| ABB88523.1    | 0.18449  | ADC68487.1     | 0.1916   | BAH67292.1    | 0.14948  |
| ZP_05511739.1 | 0.12983  | ADC68506.1     | 0.01655  | ADC68504.1    | 1.40E-04 |
| BAH67218.1    | 0.24201  | BAH67812.1     | 0.00289  | BAH67951.1    | 1.40E-04 |
| BAH67972.1    | 0.00302  | BAH67987.1     | 0.00907  | BAI44049.1    | 0.24162  |
| BAH67801.1    | 0.23311  | BAH67776.1     | 0.25353  | BAH67216.1    | 0.17898  |
| BAH67549.1    | 0.28945  | BAH68031.1     | 0.09162  | BAH67099.1    | 0.02778  |
| BAH67100.1    | 0.02889  | BAH67129.1     | 0.19767  | BAH68007.1    | 0.06759  |
| BAH67540.1    | 0.06233  | BAH67897.1     | 0.21888  | BAH67002.1    | 0.00382  |
| BAH67231.1    | 0.00928  | BAH67436.1     | 0.03022  | BAH68092.1    | 0.00651  |
| BAH67337.1    | 0.00327  | BAH67003.1     | 0.05033  | BAH68003.1    | 0.05207  |
| BAH67442.1    | 0.01599  | BAH67438.1     | 0.01026  | BAH68093.1    | 0.07758  |
| BAH67926.1    | 0.151    | BAH67277.1     | 0.00956  | BAH67306.1    | 0.01026  |
| BAH67308.1    | 0.16323  | ACZ54365.1     | 0.21998  | BAH68065.1    | 0.20687  |
| ZP_04683617.1 | 0        | ZP_06574371.1  | 0        | BAI44059.1    | 0.10459  |
| BAH67887.1    | 0.00294  | BAH68090.1     | 0.00637  | BAH66976.1    | 0.07011  |
| BAH67702.1    | 0.03491  | BAI44038.1     | 0.00296  | BAH67704.1    | 0.0126   |
| BAH67743.1    | 0.03587  | BAH67886.1     | 0.0214   | BAH67706.1    | 0.11677  |
| BAI44039.1    | 0.07319  | BAH66974.1     | 0.04217  | BAH67883.1    | 0.03801  |
| BAH67744.1    | 0.08206  | BAH67888.1     | 0.11088  | ZP_06217030.1 | 0.07605  |
| ZP_06399904.1 | 0.09217  | BAH67309.1     | 0.00907  | BAH67279.1    | 0.00628  |
| BAH67480.1    | 0.00987  | BAH67009.1     | 1.40E-04 | BAH67403.1    | 0.07957  |
| CAE45672.1    | 0.10743  | BAH67400.1     | 0.1019   | BAH67399.1    | 0.03218  |
| CAE45668.1    | 0.07706  | BAH67787.1     | 0.21361  | BAH68026.1    | 0.19741  |
| ZP_05806326.1 | 0.05372  | BAH67641.1     | 0.03848  | BAH67643.1    | 0.02035  |
| BAH67192.1    | 0.15286  | BAH68263.1     | 0.2292   | BAH67386.1    | 0.21196  |
| ACZ54309.1    | 0.21857  | ZP_04608884.1  | 0.15874  | ZP_04696767.1 | 0        |
| ZP_06587688.1 | 0        | BAH67497.1     | 0.22567  | ACZ54304.1    | 0.01089  |
| ACZ54308.1    | 0.01316  | BAI44046.1     | 0.23151  | ZP_05514799.1 | 0.13837  |
| BAH67809.1    | 0.15272  | BAH67928.1     | 1.40E-04 | BAH67772.1    | 0.02483  |
| BAH68155.1    | 0.00614  | ADC68468.1     | 0.23293  | BAH67077.1    | 0.11617  |
| BAH67493.1    | 0.01533  | BAH67494.1     | 0.02251  | BAH67185.1    | 0.08819  |
| BAH68070.1    | 0.00612  | BAH68049.1     | 0.00925  | BAH68028.1    | 0.00924  |
| ZP_05514797.1 | 0.2076   | BAH67938.1     | 0.03105  | BAH67913.1    | 0.01293  |
| BAH67091.1    | 0.01197  | ZP_05514812.1  | 0.14696  | ADI04662.1    | 0.04875  |
| ADI04665.1    | 0.13835  | BAH67353.1     | 0.17072  | BAH67356.1    | 0.10844  |
| CAQ64688.1    | 0.00573  | BAG85028.1     | 0.02503  | BAH67476.1    | 0.25608  |
| BAH67326.1    | 0.04221  | BAH67325.1     | 0.019    | BAH67383.1    | 0.05602  |
| BAH67724.1    | 0.24076  | BAH67954.1     | 0.15408  | BAH67503.1    | 0.00938  |
| BAH67969.1    | 1.40E-04 | BAH67567.1     | 0.23396  | BAH66942.1    | 0.24589  |
| ADI04504.1    | 0.17967  | BAH67047.1     | 0.10431  | ZP_05511711.1 | 0.08271  |
| BAH67614.1    | 0.04304  | BAH68064.1     | 0.03066  | BAH67131.1    | 1.60E-04 |

KS3 Group 3A

|                |          |                |          |                |          |
|----------------|----------|----------------|----------|----------------|----------|
| BAH67901.1     | 0.00617  | BAH67334.1     | 0.07414  | BAH67233.1     | 1.40E-04 |
| BAH67236.1     | 0.02741  | AAQ84145.1     | 0.19078  | BAH67736.1     | 0.20074  |
| BAH67737.1     | 0.24865  | BAH66948.1     | 0.0217   | AAC38061.1     | 0.02675  |
| AAC38062.1     | 0.1254   | AAC38063.1     | 0.19568  | BAH66952.1     | 0.05941  |
| AAC38064.1     | 0.05214  | BAH66949.1     | 0.01605  | BAH67247.1     | 0.10081  |
| BAH67248.1     | 0.11878  | BAH67062.1     | 0.24061  | AAQ84146.1     | 0.24258  |
| YP_001537950.1 | 0.19949  | YP_001537951.1 | 1.40E-04 | ACZ54296.1     | 1.40E-04 |
| ZP_06235299.1  | 0.24489  | BAH67321.1     | 0.06864  | BAH67169.1     | 0.16764  |
| ZP_05520499.1  | 1.60E-04 | BAH67852.1     | 0.0277   | ABC84469.1     | 0.04062  |
| BAH67992.1     | 0.00356  | BAH67985.1     | 0.02109  | BAH67936.1     | 0.06154  |
| BAH67857.1     | 0.00826  | ZP_05520503.1  | 0.03171  | BAH68181.1     | 0.0127   |
| ZP_05520501.1  | 0.02694  | ABC84470.1     | 0.06959  | BAH67073.1     | 0.14946  |
| ADC68427.1     | 0.21455  | ZP_05520489.1  | 0.03961  | BAH67161.1     | 0.03832  |
| ABC84461.1     | 0.02539  | BAH68132.1     | 0.02189  | ADI11532.1     | 1.50E-04 |
| AAP42860.1     | 0.00763  | ADC68498.1     | 0.00564  | AAO65801.1     | 0.04771  |
| BAH67110.1     | 0.11511  | BAH67072.1     | 0.00843  | BAH67418.1     | 0.02181  |
| AAO65797.1     | 0.13432  | ADI11536.1     | 0.00264  | AAP42856.1     | 1.50E-04 |
| ZP_05520470.1  | 0.06848  | ABC84457.1     | 0.02826  | BAH67087.1     | 0.04162  |
| BAH67060.1     | 0.02673  | ZP_05520481.1  | 1.50E-04 | BAH68222.1     | 0.00313  |
| BAH68147.1     | 1.40E-04 | BAH67502.1     | 1.40E-04 | BAH67968.1     | 0.00305  |
| BAH66988.1     | 0.06027  | ZP_05520484.1  | 0.05565  | BAH67958.1     | 0.06679  |
| BAH67845.1     | 0.09861  | BAH66972.1     | 0.23695  | ZP_06241124.1  | 0.15194  |
| ZP_06240939.1  | 0.23568  | ZP_06240938.1  | 0.15088  | YP_001852061.1 | 0.22049  |
| YP_001852064.1 | 0.16716  | YP_025561.1    | 0.00246  | AAQ74421.1     | 0.01402  |
| YP_002274115.1 | 1.60E-04 | YP_001849493.1 | 0.08868  | ZP_04747737.1  | 0.02939  |
| ZP_06418133.1  | 0.24297  | YP_001538076.1 | 0.01749  | YP_001159871.1 | 0.02234  |
| ACZ54310.1     | 0.04349  | ZP_06413190.1  | 0.10479  | YP_001508558.1 | 0.07676  |
| ZP_06234807.1  | 0.09473  | YP_001507404.1 | 0.05588  | YP_482067.1    | 0.0667   |
| YP_713655.1    | 0.09439  | BAH67065.1     | 0.21004  | YP_001507779.1 | 0.22272  |
| BAH67815.1     | 0.11607  | BAH67816.1     | 0.09419  | ACI24634.1     | 0.01954  |
| ACI24639.1     | 0.02779  | BAH68281.1     | 0.16264  | ACI24636.1     | 0.1402   |
| BAH67735.1     | 0.20867  | ZP_06240941.1  | 0.21125  | ZP_06240940.1  | 0.15918  |
| BAH68291.1     | 0.15372  | BAH67830.1     | 0.17739  | BAH67637.1     | 0.20266  |
| BAH67565.1     | 0.14836  | BAH66966.1     | 0.05327  | BAH66968.1     | 0.02932  |
| BAH66967.1     | 0.03891  | BAH66971.1     | 0.03134  | BAH67882.1     | 0.01473  |
| BAI44036.1     | 0.03895  | BAI44037.1     | 0.04048  | BAI44060.1     | 0.04148  |
| BAH67085.1     | 0.2003   | BAH67360.1     | 0.17773  | YP_003102132.1 | 0.198    |
| YP_001827882.1 | 0        | ZP_06282332.1  | 0        | YP_003102374.1 | 0.19663  |
| ZP_05529707.1  | 0.20144  | ACI24627.1     | 0.03014  | BAH68227.1     | 1.50E-04 |
| BAH68216.1     | 0.00639  | BAH66930.1     | 0.1163   | NP_630372.1    | 1.60E-04 |
| AAF43113.1     | 0.04083  | ZP_05533189.1  | 0.1532   | BAH67298.1     | 0.02425  |
| BAH68191.1     | 0.00633  | ACZ54329.1     | 0.00484  | BAH67872.1     | 0.00636  |
| BAH68203.1     | 0.00321  | BAH68183.1     | 0.0032   | BAH67697.1     | 1.40E-04 |

KS3 Group 3A

|               |          |               |          |               |          |
|---------------|----------|---------------|----------|---------------|----------|
| BAH68161.1    | 0.14884  | ADC68505.1    | 0.25871  | ZP_06283346.1 | 0.24783  |
| ZP_04604285.1 | 0.11657  | NP_821592.1   | 0.31799  | BAH68011.1    | 0.14116  |
| ADC68497.1    | 0.17034  | BAH68012.1    | 0.09667  | ADI04495.1    | 0.45382  |
| BAH67280.1    | 0.19756  | BAH67552.1    | 0.29911  | ZP_06283260.1 | 0.13321  |
| BAH67798.1    | 0.16768  | BAH67393.1    | 0.04281  | BAH67392.1    | 0.04858  |
| BAH67132.1    | 0.12932  | BAH67135.1    | 0.04952  | BAH67023.1    | 0.10239  |
| BAH67659.1    | 0.13803  | BAH66953.1    | 0.16383  | ACZ54369.1    | 0.00661  |
| ACZ54368.1    | 0.18675  | BAH67633.1    | 0.19233  | ADC68484.1    | 0.22743  |
| BAH68100.1    | 0.12151  | BAH67995.1    | 0.00221  | BAH67996.1    | 0.02442  |
| ACZ54287.1    | 0.02861  | BAH67713.1    | 1.40E-04 | BAH67709.1    | 0.00313  |
| BAH67868.1    | 0.08028  | BAH68101.1    | 0.07709  | BAH67997.1    | 0.10714  |
| BAH68099.1    | 0.06441  | BAH68074.1    | 0.02244  | BAH67828.1    | 1.40E-04 |
| BAH67851.1    | 0.00307  | BAH68016.1    | 0.05789  | BAH67867.1    | 0.13261  |
| BAH67829.1    | 0.05456  | BAH68075.1    | 0.01794  | BAH68015.1    | 0.07857  |
| BAH67710.1    | 0.02562  | ACZ54288.1    | 0.05577  | BAH67558.1    | 0.17487  |
| BAH67556.1    | 0.17161  | BAH67559.1    | 0.16979  | BAH68282.1    | 0.20023  |
| ZP_04604644.1 | 0.24364  | BAH67345.1    | 0.1747   | BAH67971.1    | 0.13035  |
| ACI24635.1    | 0.12113  | BAH67344.1    | 0.01659  | BAH67989.1    | 0.01234  |
| BAH67620.1    | 0.00305  | BAH67581.1    | 0.00311  | BAH67626.1    | 0.00306  |
| BAH67604.1    | 0.00306  | BAH67562.1    | 0        | BAH67507.1    | 0        |
| BAH67555.1    | 0.10828  | BAH68283.1    | 0.15576  | BAH67554.1    | 0.12189  |
| BAH67488.1    | 0.10224  | BAH68027.1    | 0.12361  | BAH67487.1    | 0.20434  |
| ADC68496.1    | 0.18859  | ZP_06241125.1 | 0.2632   | BAH67293.1    | 0.14628  |
| BAH67660.1    | 0.1349   | CAI30442.1    | 0.15508  | CAQ52623.1    | 0.12159  |
| ACZ54361.1    | 0.09086  | ACZ54360.1    | 0.06041  | BAE93725.1    | 0.00331  |
| BAH67352.1    | 0.00887  | BAH67351.1    | 0.01597  | BAH67355.1    | 0.00632  |
| ACZ54356.1    | 0.19313  | ADC68476.1    | 1.40E-04 | ADC68479.1    | 0.00558  |
| ADC68478.1    | 1.40E-04 | ACZ54357.1    | 0.01933  | BAH67354.1    | 0.01317  |
| ZP_06275818.1 | 0.12088  | BAH68030.1    | 1.40E-04 | BAH68014.1    | 0.00908  |
| BAH67862.1    | 0.00951  | BAH67937.1    | 0.00301  | BAH68041.1    | 0.00301  |
| BAH68060.1    | 0        | BAH67986.1    | 0        | ABM47021.1    | 0.14955  |
| BAH68278.1    | 0.10935  | BAH68277.1    | 0.08216  | BAH68245.1    | 0.22004  |
| ABM47024.1    | 0.16857  | BAH67739.1    | 0.13709  | BAH67788.1    | 0.14921  |
| ZP_05511736.1 | 0.04664  | BAH67284.1    | 0.0365   | ABM47020.1    | 0.1065   |
| BAH67226.1    | 0.00802  | BAH67439.1    | 0.04408  | BAH67434.1    | 0.00384  |
| BAH68066.1    | 0.07047  | BAH66950.1    | 0.03202  | BAH67103.1    | 0.0032   |
| BAH67199.1    | 0.00913  | BAH67108.1    | 0.15218  | BAH67371.1    | 1.40E-04 |
| BAH67198.1    | 0.00302  | BAH67162.1    | 0.02019  | BAH66985.1    | 0.01738  |
| ZP_05517726.1 | 0.03871  | BAH68133.1    | 0.08591  | ZP_05000634.1 | 0.0615   |
| ZP_05517715.1 | 0.02378  | BAH66984.1    | 0.01611  | BAH67055.1    | 0.01789  |
| BAH67668.1    | 0.16173  | ZP_06568065.1 | 0.11836  | ZP_06568063.1 | 1.20E-04 |
| AAP40326.1    | 1.40E-04 | ACZ54302.1    | 0.03924  | ACZ54301.1    | 1.40E-04 |
| ACZ54300.1    | 0.01857  | ACZ54337.1    | 0.12881  | BAH67890.1    | 0.12676  |

KS3 Group 3A

|               |          |                |          |                |          |
|---------------|----------|----------------|----------|----------------|----------|
| BAH66943.1    | 0.01506  | BAH67384.1     | 0.05164  | BAH66944.1     | 0.11714  |
| BAH67076.1    | 0.05625  | ZP_05805744.1  | 0.06956  | ZP_04711973.1  | 0.12744  |
| ZP_04711972.1 | 0.0142   | ZP_04696780.1  | 0.00373  | ZP_04696777.1  | 0        |
| ZP_04711969.1 | 0        | BAI44061.1     | 0.12382  | ZP_05514810.1  | 0.13004  |
| BAH67892.1    | 0.24285  | BAH67733.1     | 0.14344  | BAH67191.1     | 0.14295  |
| BAH67533.1    | 0.15624  | BAH67184.1     | 0.1392   | BAH67531.1     | 0.11439  |
| BAH67535.1    | 0.00328  | BAH67627.1     | 0.00666  | BAH67616.1     | 0.00667  |
| BAH67571.1    | 0.00999  | BAH67593.1     | 0.00333  | BAH67563.1     | 1.40E-04 |
| BAH67582.1    | 0.01007  | BAH67585.1     | 0.00334  | BAH67606.1     | 0.00666  |
| BAH67601.1    | 0.13825  | BAH67177.1     | 0.15338  | BAH68243.1     | 0.09215  |
| ACI24637.1    | 0.20806  | BAH67179.1     | 0.10584  | ACX31704.1     | 0.0053   |
| ACX31705.1    | 0.02186  | ACR61388.1     | 0.14234  | ACR61389.1     | 0.1066   |
| BAH67711.1    | 1.40E-04 | BAH67545.1     | 0.02737  | BAH67708.1     | 0.01798  |
| BAH67712.1    | 0.03434  | BAH67854.1     | 0.0103   | ZP_05519868.1  | 1.60E-04 |
| ACO94470.1    | 0.03563  | ACO94498.1     | 0.00986  | BAH67859.1     | 0.01674  |
| ZP_05519869.1 | 0.01697  | BAH67193.1     | 0.14807  | BAH67523.1     | 0.12723  |
| BAH67600.1    | 0.17526  | BAH67189.1     | 0.03173  | BAH67190.1     | 0.02447  |
| BAH67188.1    | 0.04651  | BAH67187.1     | 0.00602  | BAH67186.1     | 0.02436  |
| ADI05102.1    | 0.22233  | BAH67178.1     | 0.10816  | BAH67180.1     | 0.09432  |
| BAH67181.1    | 0.10082  | ZP_05519865.1  | 0.08236  | ACO94472.1     | 0.04939  |
| ACO94500.1    | 0.06387  | BAH67270.1     | 0.1168   | BAH67367.1     | 0.03497  |
| BAH67825.1    | 0.00335  | BAH67835.1     | 0.01021  | BAH67755.1     | 0        |
| BAH67832.1    | 0        | BAH67303.1     | 0.085    | BAH68033.1     | 0.06067  |
| BAH67580.1    | 0.13557  | BAH67419.1     | 0.17319  | ZP_05519576.1  | 0.04803  |
| ACZ54333.1    | 0.05059  | BAH67667.1     | 0.15253  | YP_001827586.1 | 0        |
| ZP_06283310.1 | 0        | BAH67374.1     | 0.14297  | BAH67114.1     | 0.1015   |
| ZP_06399907.1 | 0        | ZP_06217032.1  | 0        | ZP_06217036.1  | 0        |
| ZP_06399909.1 | 0        | BAH67234.1     | 0.02184  | BAH67004.1     | 0.00953  |
| BAH66980.1    | 0.14241  | BAH67336.1     | 0.09916  | BAH67435.1     | 0.06446  |
| BAH67810.1    | 0.15771  | BAH67307.1     | 0.01383  | BAH67278.1     | 0.01401  |
| BAH67373.1    | 0.01288  | BAH67202.1     | 0.01545  | BAH67111.1     | 0.06622  |
| BAH67113.1    | 0.04753  | BAH67515.1     | 0.12172  | BAH67514.1     | 0.05791  |
| BAH67811.1    | 0.2258   | YP_003100462.1 | 0.14593  | ACZ54307.1     | 0.10727  |
| ZP_06283316.1 | 0.23366  | ZP_06221319.1  | 0.11112  | ZP_06221323.1  | 0.14898  |
| ZP_06397556.1 | 1.50E-04 | ZP_06220309.1  | 0.00804  | BAH67339.1     | 0.13719  |
| BAH67910.1    | 0.15209  | BAH67657.1     | 0.12559  | BAH67791.1     | 0.17149  |
| BAH67792.1    | 0.00916  | BAH67927.1     | 0.00305  | BAH67773.1     | 0.01106  |
| BAH67793.1    | 0.02136  | BAH67340.1     | 0.00154  | BAH68276.1     | 0.17219  |
| BAH66978.1    | 0.17919  | BAH67653.1     | 0.08416  | BAH67654.1     | 0.0968   |
| ADC68446.1    | 0.01758  | ADC68449.1     | 0.01121  | ADC68448.1     | 1.40E-04 |
| ADC68447.1    | 0.00559  | ACZ54340.1     | 0.00635  | BAH68102.1     | 0.02132  |
| ACZ54343.1    | 0.02474  | ACZ54339.1     | 1.50E-04 | BAH67685.1     | 0.02374  |
| ACZ54344.1    | 1.60E-04 | ACB37742.1     | 0.11165  | ACB46486.1     | 0.10572  |

KS3 Group 3A

|               |          |               |          |               |          |
|---------------|----------|---------------|----------|---------------|----------|
| BAH67686.1    | 0.01531  | ACZ54341.1    | 0.01514  | ACZ54342.1    | 1.60E-04 |
| ACB37743.1    | 0.09392  | ACB46485.1    | 0.06589  | BAH67687.1    | 0.18094  |
| BAH67935.1    | 0.10738  | BAH67947.1    | 0.12423  | BAH67944.1    | 0.03929  |
| BAH67943.1    | 0.00516  | BAH67934.1    | 0.00112  | ADC68425.1    | 0.03622  |
| ADC68511.1    | 0.04647  | ZP_05520477.1 | 0.04763  | BAH68130.1    | 0.0381   |
| AAZ77697.1    | 0.17018  | ACZ54362.1    | 0.09262  | BAH67732.1    | 0.1839   |
| BAH68162.1    | 0.15352  | BAH68224.1    | 0.11665  | BAH67548.1    | 0.0736   |
| BAH67576.1    | 0.05257  | ZP_06527468.1 | 0        | ZP_05522637.1 | 0        |
| BAH67197.1    | 1.40E-04 | BAH67730.1    | 0.07562  | BAH67731.1    | 0.07589  |
| ZP_05529710.1 | 0.08456  | BAH67748.1    | 0.10163  | BAH67624.1    | 0.02134  |
| BAH68160.1    | 0.06097  | BAH67577.1    | 0.02187  | BAH67578.1    | 0.01541  |
| BAH67579.1    | 1.40E-04 | BAH67196.1    | 0.0396   | BAH67547.1    | 0.08386  |
| ZP_05533194.1 | 0.16134  | BAH67716.1    | 0.05414  | BAH68211.1    | 0.00988  |
| BAH68186.1    | 0.00315  | BAH68199.1    | 0.0062   | BAH68202.1    | 0.00308  |
| BAH68182.1    | 1.20E-04 | ZP_05522636.1 | 0.11783  | BAH68184.1    | 0.01371  |
| BAH67328.1    | 0.029    | BAH67297.1    | 0.00661  | ZP_05533191.1 | 0.13438  |
| BAH67544.1    | 0.22019  | ACI24630.1    | 0.00481  | ACI24629.1    | 1.40E-04 |
| BAH67164.1    | 0.05068  | BAH67666.1    | 0.00311  | BAH67690.1    | 0.00308  |
| BAH67675.1    | 0        | BAH67671.1    | 0        | ZP_05519320.1 | 0.08001  |
| ADI03793.1    | 0.00673  | ADC68509.1    | 0.01621  | ZP_04700415.1 | 0.24395  |
| ZP_05512304.1 | 0.11715  | BAI44056.1    | 0.23605  | ZP_05512324.1 | 1.50E-04 |
| ZP_05512303.1 | 0.04798  | BAH57739.1    | 0.05014  | BAH68039.1    | 0.05074  |
| BAH67417.1    | 0.02219  | BAH67102.1    | 0.05246  | BAH67423.1    | 0.07736  |
| BAH67446.1    | 0.05338  | BAH67827.1    | 0.0064   | BAH68310.1    | 0.00326  |
| BAH67719.1    | 1.40E-04 | BAH67838.1    | 0.00324  | BAH67240.1    | 0.00325  |
| BAH67842.1    | 1.40E-04 | BAH67239.1    | 0.00647  | BAH67824.1    | 1.40E-04 |
| BAH67447.1    | 0.05093  | BAH67405.1    | 0.01315  | BAH67007.1    | 0.00663  |
| BAH67479.1    | 0.03162  | BAH67477.1    | 0.06304  | BAH67402.1    | 0.08488  |
| BAH67484.1    | 0.0751   | BAH66981.1    | 0.04044  | BAH67302.1    | 0.05538  |
| BAH67923.1    | 1.40E-04 | BAH67813.1    | 0.00337  | BAH67485.1    | 0.05278  |
| BAH67999.1    | 0.1465   | BAH68226.1    | 0.06275  | BAH67873.1    | 0.01233  |
| BAH68175.1    | 0.00328  | BAH68192.1    | 0.00997  | BAH67878.1    | 0.00333  |
| BAH68225.1    | 0.0101   | BAH68214.1    | 1.40E-04 | BAH68194.1    | 0.01095  |
| BAH67696.1    | 0.00756  | BAH67877.1    | 0.01241  | BAH68223.1    | 0.03071  |
| BAH68240.1    | 0.0203   | BAH68242.1    | 1.50E-04 | BAH68190.1    | 0.01321  |
| BAH67876.1    | 1.50E-04 | BAH68238.1    | 0.00662  | BAH68232.1    | 0.03011  |
| BAH67763.1    | 0.00657  | BAH67750.1    | 0.0034   | BAH68241.1    | 0.02444  |
| BAH67881.1    | 0.00665  | BAH67871.1    | 1.00E-04 | BAH68087.1    | 0.11823  |
| BAH68035.1    | 0.06759  | BAH67276.1    | 0.08291  | BAH68290.1    | 0.17816  |
| ACZ54349.1    | 0.03788  | ACZ54350.1    | 0.09171  | ABB73268.1    | 0.26579  |
| BAH67453.1    | 0.11258  | ACZ54332.1    | 0.10276  | BAH68143.1    | 0.0332   |
| BAH66969.1    | 0.04616  | BAH67703.1    | 0.05585  | BAH66991.1    | 0.02306  |
| BAH67089.1    | 0.01296  | BAH67994.1    | 0.01371  | BAH67863.1    | 0.00536  |



KS3 Group 3A

|                |          |                |          |                |          |
|----------------|----------|----------------|----------|----------------|----------|
| BAH67898.1     | 0.01333  | BAI44043.1     | 1.40E-04 | BAH67707.1     | 0.01331  |
| BAH66970.1     | 0.05844  | BAI44062.1     | 1.40E-04 | BAI44040.1     | 1.60E-04 |
| BAH67429.1     | 0.05804  | BAH67428.1     | 0.05823  | BAH68056.1     | 0.01792  |
| BAH67433.1     | 0.06012  | BAH68019.1     | 0.02986  | BAH67431.1     | 0.0822   |
| BAH68021.1     | 0.04911  | BAH68020.1     | 0.07725  | BAH68233.1     | 0.37383  |
| BAH67506.1     | 0.19308  | BAH67789.1     | 0.1487   | BAH67287.1     | 1.50E-04 |
| ZP_05511729.1  | 0.01214  | AAZ77699.1     | 0.18763  | BAH67550.1     | 0.03308  |
| BAH67551.1     | 0.08398  | CAE02602.1     | 0.0756   | CAO85893.1     | 0.04159  |
| YP_001104838.1 | 0.22338  | BAH67625.1     | 0.01821  | BAH67329.1     | 0.01836  |
| BAH67613.1     | 0.00942  | ZP_05534726.1  | 1.60E-04 | ZP_06711004.1  | 0.21738  |
| AAM54077.1     | 0.00585  | YP_003100936.1 | 0.00522  | ZP_06711001.1  | 0.18689  |
| ADC45516.1     | 1.60E-04 | ADI03829.1     | 0.00275  | ZP_06920512.1  | 0.0731   |
| BAH67752.1     | 1.40E-04 | BAH68200.1     | 0.00981  | BAH67880.1     | 1.60E-04 |
| BAH68204.1     | 0.00954  | ZP_06776450.1  | 0.11375  | ADI05000.1     | 0.08651  |
| BAH68063.1     | 0.06434  | BAH67203.1     | 0.05737  | BAH67362.1     | 0.05912  |
| BAH67683.1     | 0.00952  | BAH67634.1     | 1.40E-04 | BAH67672.1     | 0.00318  |
| BAH67527.1     | 0.13628  | BAH67727.1     | 0.06118  | BAH67802.1     | 0        |
| BAH67799.1     | 0        | BAH68261.1     | 0.03983  | BAH67432.1     | 0.07722  |
| BAH67364.1     | 0.04723  | BAH67679.1     | 0.01537  | BAH67768.1     | 0.0099   |
| BAH67692.1     | 0.01336  | BAH67052.1     | 0.01561  | BAH67194.1     | 0.23349  |
| ZP_04996078.1  | 0.05604  | BAH67759.1     | 0.05902  | BAH67900.1     | 0.01308  |
| ZP_04690561.1  | 0.02159  | BAH68088.1     | 0.10732  | BAH67970.1     | 0.00626  |
| BAH67950.1     | 1.40E-04 | BAH67955.1     | 0.0094   | BAH67981.1     | 1.50E-04 |
| BAH67974.1     | 1.50E-04 | BAH68252.1     | 0.01249  | BAI44047.1     | 0.30479  |
| BAC57029.1     | 0.11864  | AAS79460.1     | 0.01924  | AAM81585.1     | 0.02062  |
| AAB66505.1     | 0.15129  | ABY21539.1     | 0.08212  | ZP_05514811.1  | 0.14043  |
| ADI04661.1     | 0.11852  | BAH67317.1     | 0.03928  | BAH67319.1     | 0.08481  |
| BAH67318.1     | 0.18795  | BAH67316.1     | 0.08221  | BAH67473.1     | 0.18658  |
| BAH67246.1     | 0        | BAH67241.1     | 0        | BAH67259.1     | 1.40E-04 |
| ZP_06235298.1  | 0.29073  | BAH67945.1     | 0.14118  | BAH68279.1     | 0.12636  |
| ZP_01913541.1  | 0.30396  | ZP_01908136.1  | 0.33758  | ZP_01913515.1  | 0.19774  |
| BAG69048.1     | 0.00507  | ACY71545.1     | 0.01682  | ABD17635.1     | 0.00476  |
| ABD17636.1     | 0.0046   | BAG69064.1     | 0.07815  | ABD17634.1     | 0.00466  |
| ABD17632.1     | 0.00468  | ABD17633.1     | 0.00949  | BAG69070.1     | 0.01907  |
| ABD17631.1     | 0.00932  | XP_001401108.1 | 0.37157  | XP_001224327.1 | 0.32332  |
| AAR90278.1     | 0.20405  | XP_002850891.1 | 0.08335  | EFE33484.1     | 0.00798  |
| EFE40145.1     | 0.01339  | ACC99566.1     | 0.4726   | ADD65233.1     | 0.39947  |
| ZP_01460689.1  | 0.51493  | YP_905920.1    | 0.00276  | YP_001850071.1 | 1.50E-04 |
| ZP_04748260.1  | 0.05312  | NP_301233.1    | 0.05988  | AAA25369.1     | 0.00277  |
| NP_856610.1    | 1.60E-04 | ZP_05773750.1  | 0.00278  | ZP_06510991.1  | 0        |
| ZP_03421493.1  | 0        | ZP_03417096.1  | 0        | NP_217456.1    | 0        |
| ZP_03538042.1  | 0        | ZP_03429805.1  | 0        | ZP_03533490.1  | 0        |
| ZP_04746570.1  | 0.14423  | YP_001850648.1 | 0.1474   | ACZ54285.1     | 0.30354  |

KS3 Group 3A

|                |          |                |          |                |          |
|----------------|----------|----------------|----------|----------------|----------|
| YP_001289786.1 | 0.0028   | ZP_03423003.1  | 0        | ZP_06431007.1  | 0        |
| ZP_03418061.1  | 0        | ZP_06507734.1  | 0        | YP_979967.1    | 0        |
| ZP_05143388.1  | 0        | ZP_03538997.1  | 0        | ZP_04926640.1  | 0        |
| ZP_03422420.1  | 0        | NP_218342.1    | 0        | ZP_06435170.1  | 0        |
| ZP_05762226.1  | 0        | ZP_05766367.1  | 0        | ZP_03434924.1  | 0        |
| ZP_03430724.1  | 1.10E-04 | ZP_06515336.1  | 1.40E-04 | ZP_06512992.1  | 1.60E-04 |
| ZP_05763952.1  | 0        | ZP_03419997.1  | 0        | ZP_02551617.1  | 0        |
| ZP_04980446.1  | 0        | ZP_03532043.1  | 0        | ZP_03536514.1  | 0        |
| ZP_03432477.1  | 0        | ZP_04925083.1  | 0.00207  | ZP_05772304.1  | 1.40E-04 |
| ZP_06454438.1  | 1.40E-04 | NP_855206.1    | 0        | ZP_06521068.1  | 0        |
| ZP_06436882.1  | 0        | ZP_06509472.1  | 0        | ZP_06432725.1  | 0        |
| NP_216043.1    | 0        | ZP_06504661.1  | 0        | YP_001850644.1 | 0.06471  |
| ZP_04746561.1  | 0.05759  | ZP_05224676.1  | 0.03919  | NP_960801.1    | 0.01519  |
| ZP_05216557.1  | 0        | YP_881572.1    | 0        | YP_640282.1    | 0        |
| YP_001071400.1 | 0        | ZP_03427981.1  | 0        | ZP_06509101.1  | 0        |
| ZP_03424405.1  | 0        | ZP_06454067.1  | 1.40E-04 | ZP_05771924.1  | 0        |
| ZP_02550291.1  | 0        | ZP_06444241.1  | 0        | NP_335661.1    | 0        |
| NP_854867.1    | 0        | YP_001282491.1 | 0        | ZP_03419617.1  | 0        |
| ZP_05763587.1  | 0        | NP_215696.1    | 0        | ZP_06504303.1  | 0        |
| ZP_06436514.1  | 0        | YP_977335.1    | 0        | ZP_04924775.1  | 0        |
| NP_301890.1    | 0.07008  | ZP_06851669.1  | 0.04822  | ZP_05223768.1  | 0.05453  |
| NP_961538.1    | 1.40E-04 | ZP_05215712.1  | 1.40E-04 | YP_880565.1    | 0.00303  |
| YP_888986.1    | 0.18379  | NP_962698.1    | 0.16655  | YP_001703879.1 | 0.30273  |
| YP_480103.1    | 0.56428  | YP_713201.1    | 0.09619  | YP_711540.1    | 0.2069   |
| YP_001507667.1 | 0.09652  | ZP_05512101.1  | 0.15729  | ACZ54325.1     | 0.23305  |
| ZP_04996400.1  | 0.15262  | YP_905926.1    | 0        | YP_001850077.1 | 0        |
| NP_302533.1    | 0        | AAA17364.1     | 0        | ZP_04748269.1  | 0.04864  |
| NP_856604.1    | 0.00266  | ZP_05221781.1  | 0.00263  | ZP_06451350.1  | 0        |
| ZP_05765427.1  | 0        | ZP_03433949.1  | 0        | YP_003030979.1 | 0        |
| ZP_05142454.1  | 0        | ZP_03429799.1  | 0        | ZP_06522490.1  | 0        |
| NP_217450.1    | 0        | ZP_03417090.1  | 0        | ZP_02552328.1  | 0        |
| ZP_03426296.1  | 1.40E-04 | ZP_06510982.1  | 0.00437  | ZP_05769561.1  | 1.40E-04 |
| ZP_04981615.1  | 0.00999  | ZP_06434236.1  | 1.40E-04 | YP_001134655.1 | 0.08733  |
| YP_953932.1    | 0.04987  | YP_002504165.1 | 0.00272  | AAA17356.1     | 0        |
| NP_302535.1    | 0        | YP_001850079.1 | 1.60E-04 | YP_905928.1    | 0.00534  |
| ZP_04748271.1  | 0.03051  | YP_001288875.1 | 0        | ZP_03433947.1  | 0        |
| ZP_03426295.1  | 0        | NP_856602.1    | 0        | NP_217448.1    | 0        |
| YP_979038.1    | 0        | ZP_06799667.1  | 0        | ZP_03538032.1  | 0        |
| ZP_05765425.1  | 0        | ZP_02549040.1  | 0.00275  | YP_905927.1    | 0.0026   |
| YP_001850078.1 | 1.50E-04 | ZP_04748270.1  | 0.04296  | ZP_03533482.1  | 0        |
| NP_337516.1    | 0        | ZP_02549019.1  | 0        | ZP_05769560.1  | 0        |
| ZP_03433948.1  | 0        | YP_003030980.1 | 0        | ZP_05221780.1  | 0        |
| NP_217449.1    | 0        | ZP_06510981.1  | 0        | NP_302534.1    | 0.04872  |

### KS3 Group 3A

|               |         |               |          |                |         |
|---------------|---------|---------------|----------|----------------|---------|
| ACZ54286.1    | 0.03751 | YP_953933.1   | 0.03937  | YP_001134656.1 | 0.04941 |
| YP_639996.1   | 0.08948 | YP_639997.1   | 1.50E-04 | YP_001071135.1 | 0.00274 |
| BAG69131.1    | 0.31205 | ZP_02381135.1 | 0.41929  | AAW84210.1     | 0.39373 |
| ABG20979.1    | 0.29265 | AAX44144.1    | 0.21381  | ABG20983.1     | 0.25869 |
| ZP_06852108.1 | 0.25921 | ABQ50543.1    | 0.11246  | ADF36711.1     | 0.08513 |
| YP_951844.1   | 0.13844 | ABG20991.1    | 0.13723  | ZP_06852107.1  | 0.05228 |
| ABK01382.1    | 0.35229 |               |          |                |         |

KS3 Group 3B

| Sequence       | Distance | Sequence      | Distance | Sequence      | Distance |
|----------------|----------|---------------|----------|---------------|----------|
| AAW84225.1     | 0.13217  | AAW84224.1    | 0.17288  | AAW84199.1    | 0.30753  |
| ABK01357.1     | 0.09957  | ABK01364.1    | 0.00484  | ABK01352.1    | 0.01443  |
| ABK01370.1     | 0.10491  | ABK01381.1    | 0.05168  | AAW84184.1    | 0.02175  |
| AAW84201.1     | 0.05067  | AAW84206.1    | 0.08822  | ABK01355.1    | 0.00715  |
| ABK01354.1     | 0.07703  | ABK01356.2    | 1.50E-04 | AAW84230.1    | 0.11618  |
| AAW84190.1     | 0.03998  | AAW84204.1    | 0.10778  | ABK01369.1    | 1.40E-04 |
| ABK01360.2     | 1.30E-04 | ABK01400.2    | 1.40E-04 | ABK01363.1    | 1.40E-04 |
| ABK01365.1     | 1.40E-04 | ABK01358.2    | 1.10E-04 | ABK01361.2    | 1.60E-04 |
| ABK01372.1     | 1.40E-04 | AAW84185.1    | 0.08091  | ABK01336.1    | 0.07902  |
| ABK01337.1     | 0.07411  | AAW84179.1    | 0.10483  | AAW84181.1    | 0.06783  |
| ABK01329.1     | 0.01005  | AAW84219.1    | 0.10573  | AAW84231.1    | 0.13336  |
| AAW84227.1     | 0.09574  | ABK01396.1    | 0.18604  | ABK01374.1    | 0.10043  |
| AAW84189.1     | 0.01385  | ABK01377.1    | 0.0141   | ABK01326.1    | 0.03334  |
| ABK01340.1     | 0.0224   | ABB73279.1    | 0.05783  | ABK01335.1    | 1.50E-04 |
| ABK01345.1     | 0.0737   | ABK01338.1    | 0.04764  | ABK01347.1    | 0.00477  |
| ABB73281.1     | 0.07161  | ABK01349.1    | 0.03183  | AAW62333.1    | 0.02751  |
| ABB73277.1     | 0.01301  | ABK01348.1    | 0.01559  | AAQ91805.1    | 0.02836  |
| ABB73280.1     | 0.06168  | AAQ91804.1    | 0.03884  | ABB73276.1    | 0.01328  |
| AAW84182.1     | 0.01322  | ABK01331.1    | 0.01989  | ABK01334.1    | 0.09771  |
| AAW84183.1     | 0.06134  | ABK01342.1    | 0.12627  | ABB73274.1    | 0.03442  |
| ABK01397.1     | 0.03079  | ABB73273.1    | 0.04795  | ABK01346.1    | 0.03261  |
| AAQ91806.1     | 1.40E-04 | AAQ91807.1    | 0.01379  | ABK01339.1    | 0.00908  |
| AAW84193.1     | 1.40E-04 | ABK01343.1    | 0.11558  | AAQ91803.1    | 0.08974  |
| ABK01327.1     | 0.10181  | ABK01341.1    | 0.04663  | ABK01328.1    | 0.03701  |
| ABK01344.1     | 0.03368  | ABB73275.1    | 0.0081   | AAQ91802.1    | 0.01643  |
| ABB73278.1     | 0.04856  | ABK01332.1    | 0.11529  | AAW84205.1    | 0.18594  |
| ABK01376.1     | 0.15774  | ABK01373.1    | 0.02902  | ABK01368.1    | 1.40E-04 |
| ABK01359.1     | 1.40E-04 | ABK01367.1    | 0.00458  | ABK01350.1    | 0.00243  |
| ABK01351.2     | 0.0046   | ABK01378.1    | 0.06532  | AAW84223.1    | 0.03837  |
| AAW62332.1     | 0.13219  | ABK01375.1    | 0.01009  | AAW84202.1    | 0.01352  |
| AAW84212.1     | 0.16061  | AAW84213.1    | 0.13051  | AAW84215.1    | 0.21762  |
| AAW62308.1     | 0.01745  | AAW62309.1    | 0.10005  | AAW84229.1    | 0.10245  |
| ABK01330.1     | 0.09102  | AAQ91799.1    | 0.14651  | AAW84188.1    | 0.10734  |
| AAW84214.1     | 0.19498  | AAW84218.1    | 0.18602  | ABK01398.2    | 1.40E-04 |
| ABK01371.1     | 0.00521  | AAW84228.1    | 0.14243  | AAW84180.1    | 0.16415  |
| AAW84226.1     | 0.16879  | AAW84200.1    | 0.15003  | ZP_01466498.1 | 0        |
| AAF19814.1     | 0        | BAG68986.1    | 0.1767   | CAD89777.1    | 0.07187  |
| AAW03329.1     | 1.40E-04 | BAG69016.1    | 0.01004  | ACN13116.1    | 0.69661  |
| YP_002907572.1 | 0.33836  | YP_632475.1   | 0.10073  | tpeCAQ34917.1 | 1.40E-04 |
| ZP_01462889.1  | 0.003    | CAQ18835.1    | 0.37827  | ZP_01462900.1 | 0.10596  |
| YP_632473.1    | 0.08372  | ZP_01466833.1 | 0.00286  | tpeCAQ34929.1 | 1.40E-04 |
| YP_632472.1    | 0.07752  | BAG68974.1    | 0.03414  | tpeCAQ34920.1 | 1.40E-04 |

KS3 Group 3B

|                |          |                |          |                |          |
|----------------|----------|----------------|----------|----------------|----------|
| ZP_01462897.1  | 1.60E-04 | ACF54730.1     | 0.40715  | AAW84191.1     | 0.36235  |
| ZP_05529764.1  | 0.71383  | ADE08307.1     | 0.25066  | CAQ18828.1     | 0.26172  |
| YP_003265632.1 | 0.39934  | YP_003265633.1 | 0.34546  | ZP_01463113.1  | 0.3045   |
| BAG69089.1     | 0.00499  | ACY71541.1     | 0.00512  | ACY71555.1     | 0.01504  |
| BAG69074.1     | 1.50E-04 | ABD17627.1     | 0.00891  | ABD17626.1     | 0.01335  |
| ABD17625.1     | 1.40E-04 | BAG69071.1     | 0.00586  | ACY71565.1     | 0.35666  |
| ACY71579.1     | 0.13644  | CAJ46690.1     | 0.15541  | AAF26923.1     | 1.50E-04 |
| AAF62885.1     | 0        | ABB92695.1     | 0        | ADB12493.1     | 1.40E-04 |
| ACB46197.1     | 0.00843  | ACY71558.1     | 0.31455  | YP_003267375.1 | 0.15741  |
| CAO98848.1     | 0        | ZP_01463123.1  | 0        | BAG68976.1     | 0.28175  |
| ZP_01467546.1  | 0.14699  | ZP_01466715.1  | 0.06804  | ZP_01466717.1  | 0.10796  |
| ACY71583.1     | 0.24803  | ACY71578.1     | 0.14144  | ABD17630.1     | 0.02045  |
| ACY71543.1     | 0.044    | ACY71537.1     | 0.01504  | ABD17628.1     | 0.06052  |
| ABD17629.1     | 0.05844  | CAD19092.1     | 0.26406  | ADE08274.1     | 0.34869  |
| AAAX44135.1    | 0.21666  | YP_003138776.1 | 0.00257  | YP_002373163.1 | 1.50E-04 |
| ZP_01728761.1  | 0.03986  | AAW55368.1     | 0.03425  | AAW55369.1     | 1.40E-04 |
| AAW55370.1     | 0.00467  | YP_003138777.1 | 0.01074  | YP_002373162.1 | 1.40E-04 |
| ZP_01728762.1  | 0.12765  | AAW55374.1     | 0.12095  | ADD65246.1     | 0.19209  |
| ACC99579.1     | 0.14024  | ADF36703.1     | 0.14047  | AAW84187.1     | 0.39697  |
| ACY71570.1     | 0.29415  | ZP_02383046.1  | 0.46745  | BAG69118.1     | 0.39655  |
| YP_442886.1    | 0        | ZP_02388623.1  | 0        | ABP57747.1     | 0.06238  |
| ZP_02468489.1  | 0.02467  | AAW84178.1     | 0.28609  | YP_003267377.1 | 0.07838  |
| CAO98850.1     | 1.40E-04 | ZP_01466426.1  | 0.0027   | BAG68999.1     | 0.59727  |
| AAW84220.1     | 0.28802  | ABI34078.1     | 0.00469  | ABP68564.1     | 1.50E-04 |
| CAO82981.1     | 0.05675  | AAW84177.1     | 0.16211  | YP_552077.1    | 0.4261   |
| YP_778113.1    | 0.25354  | ZP_02885974.1  | 0.0849   | YP_778100.1    | 0.01076  |
| ZP_02905098.1  | 0.014    | ACV42478.1     | 0        | AAT70108.1     | 0        |
| YP_723339.1    | 0.18164  | AAT70106.1     | 0.13492  | ACF24471.1     | 0.01899  |
| CAO90355.1     | 1.50E-04 | AAW84186.1     | 0.05275  | AAW84196.1     | 0.09659  |
| YP_324486.1    | 0.19671  | AAW55383.1     | 0.00465  | AAW55384.1     | 1.60E-04 |
| NP_486719.1    | 0.03639  | AAW55381.1     | 1.40E-04 | AAW55382.1     | 0.00476  |
| AAW55380.1     | 1.40E-04 | ZP_01628023.1  | 0.0139   | AAAX44105.1    | 0.00705  |
| AAW55378.1     | 0.01853  | YP_001804492.1 | 0.01983  | AAW55379.1     | 0.01397  |
| ZP_00514739.1  | 1.40E-04 | YP_001865644.1 | 0.00514  | AAW55385.1     | 0.00457  |
| YP_002912100.1 | 0.4336   | ACD39169.1     | 0        | AAQ90174.1     | 0        |
| YP_002440182.1 | 0        | YP_259895.1    | 0.1533   | ABO15888.1     | 0.17189  |
| ABO15860.1     | 0.07651  | ZP_02382308.1  | 0.71654  | CAM34285.1     | 0.36779  |
| AAW84169.1     | 0.29651  | ACR33077.1     | 0.26174  | YP_001415915.1 | 0.48989  |
| ABK01389.1     | 0.54981  | YP_003073814.1 | 0.26294  | YP_610927.1    | 0.56079  |
| AAO39781.1     | 0.08393  | ACF54739.1     | 0.01458  | ACF54740.1     | 0.00521  |
| YP_003656369.1 | 0.65487  | ABK01388.1     | 0.34893  | ADF88277.1     | 1.40E-04 |
| AAF76933.1     | 1.50E-04 | ADF88260.1     | 1.40E-04 | ABX60163.1     | 0        |
| ZP_06307803.1  | 0        | ABU49633.1     | 1.40E-04 | AAM33470.1     | 1.50E-04 |

### KS3 Group 3B

|                |          |                |          |                |          |
|----------------|----------|----------------|----------|----------------|----------|
| ABU49631.1     | 1.40E-04 | BAG69050.1     | 0.18384  | ACY71547.1     | 0.10991  |
| YP_001983456.1 | 0.43396  | AAW84211.1     | 0.31865  | ACC99582.1     | 0.18407  |
| AAO39786.1     | 0.38094  | AAO39778.1     | 0.03786  | ACR33078.1     | 1.50E-04 |
| AAAX44137.1    | 0.04203  | YP_001866731.1 | 0.29008  | YP_001865643.1 | 1.50E-04 |
| AAW55375.1     | 0.0095   | AAS98782.1     | 0.24511  | AAT70104.1     | 0.03773  |
| AAT70107.1     | 0.09049  | ADF36710.1     | 0.24614  | YP_001866572.1 | 0.00934  |
| AAW55376.1     | 0.01801  | CAQ18830.1     | 0.32585  | CAD19091.1     | 0.25229  |
| YP_001866573.1 | 0.01293  | AAW55377.1     | 0.01136  | BAG68985.1     | 0.09529  |
| ABA29782.1     | 1.60E-04 | BAG69005.1     | 1.40E-04 | YP_632694.1    | 0.07687  |
| AAK57186.1     | 0.00781  | BAG69025.1     | 1.50E-04 | YP_001866571.1 | 0.29825  |
| ABQ50541.1     | 0.2868   | ZP_06307815.1  | 0.0054   | ADF88276.1     | 1.60E-04 |
| BAG69035.1     | 0.2061   | CAD19093.1     | 0.22112  | CAD19088.1     | 0.2895   |
| CAD89776.1     | 0.06868  | AAW03328.1     | 1.60E-04 | BAG69006.1     | 0.00495  |
| BAG68969.1     | 0.07633  | BAG69026.1     | 0.01961  | AAF19813.1     | 1.60E-04 |
| ACY71580.1     | 0.28701  | ACC99563.1     | 0.3321   | tpeCAQ34928.1  | 0        |
| ZP_01466838.1  | 0        | YP_632467.1    | 0.06819  | ZP_01466422.1  | 0.42874  |
| YP_001818848.1 | 0.4129   | YP_001866730.1 | 0.25324  | YP_001865642.1 | 0.22278  |
| ABG20992.1     | 0.28044  | YP_001865641.1 | 0.30288  | AAW55366.1     | 0.16303  |
| AAW55365.1     | 0.17425  | AAW55363.1     | 1.40E-04 | YP_001866564.1 | 0.00823  |
| AAW55364.1     | 0.01882  | AAAX44145.1    | 0.29017  | AAT70105.1     | 0.03994  |
| AAS98783.1     | 0.04084  | AAW84197.1     | 0.34985  | YP_001657795.1 | 0.12579  |
| AAAX44127.1    | 1.40E-04 | AAAX44125.1    | 1.40E-04 | YP_325237.1    | 0.00461  |
| NP_485688.1    | 0.01009  | CAD19087.1     | 0.26817  | AAW55367.1     | 0.2424   |
| ADE08284.1     | 0.3236   | ZP_02381210.1  | 0.30296  | AAW84216.1     | 0.21343  |
| AAAX44138.1    | 0.08763  | ABX60162.1     | 0        | ZP_06307805.1  | 0        |
| ADF88280.1     | 0.00529  | ZP_06307814.1  | 0.00729  | ADF88275.1     | 0.00679  |
| ACR33079.1     | 0.39124  | YP_003073812.1 | 0.45111  | ZP_05036253.1  | 0.44022  |
| AAW84175.1     | 0.176    | ZP_01628022.1  | 0.08983  | NP_486720.1    | 0.02809  |
| YP_001804493.1 | 0.03947  | ZP_00514740.1  | 1.60E-04 | AAW55373.1     | 0.0046   |
| AAW55372.1     | 1.40E-04 | AAW55371.1     | 0.00464  | ACC99577.1     | 0.3154   |
| YP_001544628.1 | 0.25094  | YP_003266192.1 | 0.31804  | YP_632575.1    | 0.14195  |
| ZP_05037594.1  | 0.30869  | AAW55388.1     | 0.00461  | AAW55386.1     | 1.40E-04 |
| ZP_05029386.1  | 0.01061  | AAW55387.1     | 1.40E-04 | AAAX44130.1    | 0.24789  |
| AAW55389.1     | 0.17712  | YP_324603.1    | 0.01416  | AAAX44126.1    | 0.00407  |
| ACC99575.1     | 0.34261  | ACC99561.1     | 0.30677  | AAW84168.1     | 0.13963  |
| AAW84172.1     | 0.18734  | ZP_01731311.1  | 0.23451  | YP_001805175.1 | 0.19234  |
| YP_002378014.1 | 0.18594  | CAQ48259.1     | 0.20076  | ZP_01728763.1  | 0.2089   |
| YP_002373161.1 | 0.13373  | AAAY42396.1    | 0.21894  | AAW55392.1     | 1.40E-04 |
| AAW55391.1     | 0.00458  | BAF68998.1     | 0.38901  | AAW55390.1     | 0.00445  |
| YP_001866729.1 | 1.60E-04 | AAU93832.1     | 0.08716  | AAU93833.1     | 0.12069  |
| AAO39788.1     | 0.07884  | YP_001734428.1 | 0.29831  | YP_002377174.1 | 0.08628  |
| AAAX44107.1    | 0.08439  | ZP_03153601.1  | 0.10765  | ZP_01088963.1  | 0.09901  |
| AAAX44122.1    | 0.17109  | CAM34324.1     | 0.37302  | YP_434162.1    | 0.18123  |

KS3 Group 3B

|                |          |                |          |                |          |
|----------------|----------|----------------|----------|----------------|----------|
| ACC99586.1     | 0.08137  | ACC99565.1     | 0.02452  | ACC99583.1     | 0.04242  |
| NP_924890.1    | 0.29337  | CAM34283.1     | 1.40E-04 | CAM34282.1     | 0.0046   |
| YP_001657794.1 | 0.15234  | NP_485689.1    | 0.01472  | YP_325234.1    | 0.00794  |
| NP_925775.1    | 0.20267  | NP_924900.1    | 0.21584  | CAX84229.1     | 0.33548  |
| CAM34265.1     | 0.27216  | ACI32874.1     | 0.29184  | YP_001546719.1 | 0.339    |
| ABG20990.1     | 0.30032  | ADF57390.1     | 0.25523  | ADF57407.1     | 0.30947  |
| YP_003540039.1 | 0        | YP_003529806.1 | 0        | ADF57393.1     | 0.2748   |
| ADE08316.1     | 0.05988  | ADD65226.1     | 0.05053  | ADD65259.1     | 0.01071  |
| ADE08343.1     | 0.00311  | ADD65281.1     | 0.00483  | ADD65264.1     | 1.40E-04 |
| YP_001546720.1 | 0.31951  | ABG20977.1     | 0.29495  | CAQ43078.1     | 0.22599  |
| ADF57401.1     | 0.48548  | CAD19089.1     | 0.33933  | YP_003265638.1 | 0.43601  |
| ACY71582.1     | 0.26452  | YP_003265646.1 | 0.41617  | CAQ18833.1     | 0.28018  |
| ADF57406.1     | 0.23649  | CAD19090.1     | 0.37514  | CAQ43076.1     | 0.32151  |
| BAG68987.1     | 0.02917  | BAG68997.1     | 0.00795  | BAG69033.1     | 0.00536  |
| BAG68994.1     | 1.40E-04 | BAG69018.1     | 0.00536  | ACY71573.1     | 0.10295  |
| BAG69008.1     | 0.04019  | AAK57189.1     | 0.03759  | YP_632697.1    | 0.05454  |
| BAG69027.1     | 0.04844  | BAG69004.1     | 0.02017  | CAQ43079.1     | 0.44006  |
| CAD19086.1     | 0.28215  | ADD65221.1     | 0.24759  | ACI32875.1     | 0.37887  |
| YP_001818844.1 | 0.2365   | ACC99585.1     | 0.34553  | CAQ16325.1     | 0.28942  |
| NP_522202.1    | 0.03549  | YP_002254772.1 | 1.20E-04 | YP_002257475.1 | 0.00268  |
| ABH08747.1     | 0.02882  | ABG20980.1     | 0.00435  | ZP_02381208.1  | 0.06681  |
| ZP_02907842.1  | 0.00623  | ZP_02890743.1  | 1.50E-04 | YP_778356.1    | 0.00886  |
| ADD65218.1     | 0.22019  | BAG69128.1     | 0.28353  | ZP_06191939.1  | 0.53994  |
| ACM47955.1     | 0.46285  | BAG84248.1     | 0.17199  | NP_630013.1    | 1.50E-04 |
| ZP_06527946.1  | 0        | ZP_05523113.1  | 0        | ABG20985.1     | 0.64118  |
| ZP_02371248.1  | 0.00264  | ZP_02385145.1  | 1.50E-04 | YP_729393.1    | 0.50878  |
| ACC99580.1     | 0.36256  | NP_630898.1    | 0.0413   | ACZ54358.1     | 0.03734  |
| ACZ54359.1     | 0.0336   | ABK63806.2     | 0.60607  | YP_001509636.1 | 0.53979  |
| BAI44064.1     | 0.14874  | YP_003509955.1 | 0.20833  | NP_822424.1    | 0.05565  |
| ACN13115.1     | 0.15134  | YP_001415916.1 | 0.4552   | YP_001544644.1 | 0.28296  |
| YP_001545180.1 | 0.31987  | ABG20994.1     | 1.40E-04 | ABH08749.1     | 1.40E-04 |
| CAO82989.1     | 0.01426  | CAO82984.1     | 0.00395  | ZP_04748540.1  | 0.23475  |
| ADE08324.1     | 0.0104   | ADF57404.1     | 0.11127  | ADE08306.1     | 0.00964  |
| ADD65287.1     | 0.00948  | ADE08325.1     | 1.40E-04 | ADD65235.1     | 0.00479  |
| ADD65244.1     | 0.01934  | ADD65232.1     | 0.00472  | ADD65230.1     | 1.40E-04 |
| ADE08334.1     | 0.00957  | ADD65228.1     | 1.40E-04 | ADE08282.1     | 0.00472  |
| ADD65289.1     | 0.01563  | ADD65297.1     | 0.01439  | ADE08321.1     | 0.00476  |
| ADD65262.1     | 0.00473  | ADD65273.1     | 1.40E-04 | ADE08315.1     | 1.50E-04 |
| ADE08294.1     | 1.60E-04 | ADD65300.1     | 0.01912  | ADE08270.1     | 0.01942  |
| ADE08329.1     | 0.01913  | ADD65239.1     | 1.40E-04 | ADE08276.1     | 1.40E-04 |
| ADD65268.1     | 0.00964  | ADD65277.1     | 0.00478  | ADE08327.1     | 0.00965  |
| ADD65240.1     | 1.40E-04 | ADE08299.1     | 0.00966  | ADD65252.1     | 0.00483  |
| ADD65249.1     | 0.00484  | ADD65217.1     | 1.40E-04 | ADD65291.1     | 0.00482  |

KS3 Group 3B

|                |          |                |          |               |          |
|----------------|----------|----------------|----------|---------------|----------|
| ADD65279.1     | 1.40E-04 | ADE08308.1     | 0.00963  | ADE08277.1    | 0.00959  |
| ADD65243.1     | 1.40E-04 | ADD65253.1     | 1.40E-04 | ADD65302.1    | 0.00966  |
| ADD65256.1     | 0.00478  | ADE08275.1     | 0.01939  | ADD65250.1    | 0.00964  |
| ADD65216.1     | 0.00481  | ADD65242.1     | 1.40E-04 | ADD65254.1    | 0.00979  |
| ADD65248.1     | 0.00954  | ADE08305.1     | 0.02427  | ADE08292.1    | 0.00967  |
| ADE08271.1     | 1.60E-04 | ADE08296.1     | 1.40E-04 | ADD65224.1    | 1.40E-04 |
| ADD65305.1     | 0.00964  | ADD65303.1     | 1.40E-04 | ADD65263.1    | 0.0097   |
| ADE08283.1     | 1.60E-04 | ADD65299.1     | 0.01447  | ADE08289.1    | 0.02413  |
| ADD65278.1     | 0.00962  | ADD65285.1     | 0.00963  | ADD65257.1    | 0.00477  |
| ADE08279.1     | 0.00479  | ADD65237.1     | 0.00478  | ADD65245.1    | 1.40E-04 |
| ADD65241.1     | 0.00477  | ADD65227.1     | 1.40E-04 | ADE08268.1    | 1.40E-04 |
| ADD65258.1     | 0.01921  | ADE08281.1     | 1.60E-04 | ADD65304.1    | 0.00953  |
| ADD65267.1     | 0.01439  | ADE08301.1     | 0.00476  | ADD65214.1    | 0.00483  |
| ADE08287.1     | 0.01444  | ADD65212.1     | 0.03394  | ADE08313.1    | 1.60E-04 |
| ADE08335.1     | 0.01431  | ADE08317.1     | 0.02429  | ADD65223.1    | 0.02895  |
| ADE08288.1     | 1.60E-04 | ADE08304.1     | 0.00479  | ADE08297.1    | 0.00961  |
| ADD65290.1     | 0.01464  | ADD65222.1     | 0.01458  | ADD65234.1    | 0.00464  |
| ADD65260.1     | 0.00961  | ADD65284.1     | 1.60E-04 | ADD65219.1    | 0.01926  |
| ADE08312.1     | 0.01914  | ADD65213.1     | 0.0148   | CAQ43075.1    | 0.34821  |
| CAG25974.1     | 0.39068  | AAW55398.1     | 1.40E-04 | NP_924887.1   | 0.05292  |
| AAW55397.1     | 0.00479  | AAX44108.1     | 1.40E-04 | AAX44110.1    | 0.00463  |
| AAW55395.1     | 0.00466  | AAW55396.1     | 0.00444  | AAX44142.1    | 0.07995  |
| AAW55394.1     | 1.50E-04 | AAW55393.1     | 0.0095   | AAX44131.1    | 0.00448  |
| AAW55403.1     | 1.40E-04 | AAW55402.1     | 1.40E-04 | AAX44132.1    | 1.40E-04 |
| ZP_05034942.1  | 0.10448  | AAW55408.1     | 0.16253  | AAW55407.1    | 0.00958  |
| AAW55406.1     | 0.00481  | AAW55404.1     | 1.40E-04 | ZP_01462080.1 | 0.17661  |
| YP_002483591.1 | 0.45385  | AAS98777.1     | 0.19667  | YP_632476.1   | 0.16487  |
| tpeCAQ34916.1  | 1.40E-04 | ZP_01462893.1  | 0.00286  | BAG69117.1    | 0.04861  |
| BAG69113.1     | 0.11249  | AAO39790.1     | 0.2949   | ADD65251.1    | 0.25753  |
| ADD65225.1     | 1.60E-04 | ADD65301.1     | 0.00473  | AAX44120.1    | 1.40E-04 |
| AAX44123.1     | 0.00444  | ACF54734.1     | 0.41922  | ZP_00944386.1 | 0.51176  |
| NP_870253.1    | 0.55354  | AAO62582.1     | 0.04308  | ZP_01629641.1 | 1.50E-04 |
| AAO64407.1     | 0.00269  | CAD29794.1     | 0.00536  | CAQ48242.1    | 1.50E-04 |
| YP_001658875.1 | 0.00441  | ACJ71240.1     | 1.50E-04 | CAO90229.1    | 0        |
| AAF00958.1     | 0        | BAB12211.1     | 0.00273  | ACJ71241.1    | 1.40E-04 |
| AAG10057.1     | 0.16187  | ACH86093.1     | 0.01031  | YP_388101.1   | 0.43403  |
| CAO90356.1     | 0.25897  | AAT70103.1     | 0.41222  | ACC99569.1    | 0.2331   |
| BAG69036.1     | 0.20475  | ADF57397.1     | 0.37456  | ACC99574.1    | 0.14704  |
| ACC99572.1     | 0.19958  | ACC99568.1     | 0.1717   | CAQ43077.1    | 0.37266  |
| BAG69007.1     | 0.0184   | AAK57188.1     | 0.01711  | YP_632696.1   | 0.06863  |
| BAG68998.1     | 0.27829  | YP_003073813.1 | 0.38111  | ADF57384.1    | 0.44141  |
| YP_002754258.1 | 0.27447  | ZP_02381158.1  | 0.15219  | AAW84209.1    | 0.30649  |
| BAG69029.1     | 0.34323  | YP_003267373.1 | 0.09549  | CAO98847.1    | 0        |



KS3 Group 3B

|                |          |                |          |                |          |
|----------------|----------|----------------|----------|----------------|----------|
| ZP_01463114.1  | 0        | BAD38875.1     | 0.31065  | ABB73269.1     | 0.14412  |
| ZP_06890509.1  | 0.08656  | BAG68977.1     | 0.32174  | BAG69020.1     | 0.33444  |
| ADB12488.1     | 0.00601  | ACB46192.1     | 0.00537  | AAF62880.1     | 0        |
| ABB92690.1     | 0        | AAF26919.1     | 0.01081  | ACY71576.1     | 0.29232  |
| AAW84174.1     | 0.45549  | YP_003073810.1 | 0.36305  | CAM34284.1     | 0.46391  |
| ZP_04622165.1  | 0.49576  | ZP_04700332.1  | 0.63317  | YP_777801.1    | 0.02139  |
| ZP_02383264.1  | 0.04329  | ABK01392.1     | 0.43058  | ABK01384.1     | 0.52836  |
| ZP_06185949.1  | 0.51124  | CAQ16327.1     | 0.48001  | ZP_01879699.1  | 0.74479  |
| ACF54733.1     | 0.56414  | ADI03644.1     | 0.37642  | ZP_05480792.1  | 0.41466  |
| YP_777802.1    | 0.02574  | ZP_02381479.1  | 0.03709  | YP_777804.1    | 0.03949  |
| ZP_02381338.1  | 0.02647  | CAM34266.1     | 0.00944  | CAM34267.1     | 0.01035  |
| AAW84176.1     | 0.19266  | AAT70096.1     | 0.32506  | BAI44055.1     | 0.14137  |
| ACZ54327.1     | 0.2702   | ZP_05109046.1  | 0.59531  | ABI36818.1     | 0.27629  |
| ZP_06415899.1  | 0.31706  | ZP_06890219.1  | 0.18248  | AAX39746.1     | 0.90869  |
| ADF57391.1     | 0.32846  | ABP73645.1     | 0        | YP_001157876.1 | 0        |
| ZP_01465307.1  | 0.27457  | CAQ64686.1     | 0.2759   | AAQ74418.1     | 0.45074  |
| ZP_06847132.1  | 0.14938  | ZP_05225900.1  | 0.11882  | ZP_05217071.1  | 1.60E-04 |
| YP_882291.1    | 0.00927  | ZP_05764089.1  | 0        | NP_855344.1    | 0        |
| ZP_06517152.1  | 1.40E-04 | ZP_03424906.1  | 0        | NP_216180.1    | 0        |
| ZP_03432603.1  | 1.40E-04 | ZP_04925187.1  | 0.00313  | ZP_04748782.1  | 0.12416  |
| YP_001850778.1 | 1.40E-04 | YP_905621.1    | 0.02215  | ZP_06473902.1  | 0.25284  |
| ZP_04604284.1  | 0.24824  | AAP85336.1     | 0.28989  | ZP_05511703.1  | 0.26689  |
| ZP_06710998.1  | 0.23337  | ZP_05511588.1  | 0.58654  | ZP_01997310.1  | 0.76021  |
| YP_003300365.1 | 0.49529  | YP_001106335.1 | 0.2768   | ADB23402.1     | 0.27845  |
| BAG69065.1     | 0.2961   | BAG69034.1     | 0.16147  | YP_003267379.1 | 0.1453   |
| ZP_01467322.1  | 1.40E-04 | CAO98852.1     | 1.60E-04 | AAK57190.1     | 0.07309  |
| YP_632698.1    | 1.40E-04 | BAG68961.1     | 1.60E-04 | ACY71574.1     | 0.01     |
| ABD17671.1     | 1.40E-04 | ABD17669.1     | 0.01403  | ABD17670.1     | 0.01853  |
| BAG69087.1     | 0.00479  | BAG69072.1     | 1.40E-04 | ABD17667.1     | 0.00478  |
| ACY71564.1     | 0.009    | ABD17668.1     | 0.01841  | CAQ18838.1     | 0.27107  |
| BAG69078.1     | 0.18     | BAG69104.1     | 0.00514  | BAG69101.1     | 0.02432  |
| BAG69116.1     | 0.05884  | BAG69123.1     | 0.04267  | CAD19085.1     | 0.17784  |
| YP_001104830.1 | 0.26121  | ABD17663.1     | 1.50E-04 | ABD17664.1     | 0.02302  |
| ABD17662.1     | 0.00406  | ABD17665.1     | 0.02809  | ADE08285.1     | 1.40E-04 |
| ADE08341.1     | 0.00963  | ACY71539.1     | 0.11475  | BAG69043.1     | 0.01619  |
| ABD17660.1     | 0.01407  | ABD17661.1     | 1.20E-04 | ADF57408.1     | 0.26256  |
| ADD65293.1     | 0.1097   | BAG68978.1     | 0.16208  | BAG69010.1     | 0.21069  |
| NP_851482.1    | 0.79787  | ACI24633.1     | 0.2584   | ACY71569.1     | 0.02975  |
| BAG69060.1     | 1.50E-04 | ABK32287.1     | 1.40E-04 | ABK32255.1     | 0.00675  |
| ADE08311.1     | 0.21705  | ABK01385.1     | 0.20069  | YP_003540038.1 | 0        |
| YP_003529807.1 | 0        | YP_003263387.1 | 0.27992  | ABG20996.1     | 0.1604   |
| XP_002399422.1 | 0.29849  | YP_748191.1    | 0.14729  | NP_841435.1    | 0.10717  |
| ADD65276.1     | 0.00931  | ADD65280.1     | 1.60E-04 | YP_001898724.1 | 0.14148  |

KS3 Group 3B

|                |          |                |          |                |          |
|----------------|----------|----------------|----------|----------------|----------|
| ZP_03267586.1  | 0.09632  | ZP_02356869.1  | 0        | ZP_02363963.1  | 0        |
| ZP_02464609.1  | 0.01059  | ZP_02387461.1  | 0        | ZP_05586320.1  | 0        |
| YP_441888.1    | 1.40E-04 | ZP_04966561.1  | 0.00281  | ZP_02491295.1  | 0        |
| YP_001060246.1 | 0        | YP_991888.1    | 0        | ZP_04901289.1  | 0        |
| YP_103851.1    | 0        | ZP_01767186.1  | 0        | YP_002898088.1 | 0        |
| YP_001067508.1 | 0        | YP_109384.1    | 0        | ZP_02373605.1  | 0.01614  |
| ZP_04898137.1  | 1.40E-04 | YP_334656.1    | 0.00265  | ZP_02404262.1  | 0.00281  |
| ZP_02457099.1  | 0        | ZP_03789792.1  | 0        | ZP_02412772.1  | 0        |
| ZP_03451875.1  | 0        | ZP_02909420.1  | 0.01874  | YP_368116.1    | 0.00799  |
| ZP_04939550.1  | 0.00266  | YP_001764051.1 | 0.00538  | YP_834428.1    | 0        |
| YP_620184.1    | 0        | YP_002232331.1 | 1.50E-04 | YP_002910562.1 | 0.09069  |
| AAX62304.1     | 0.6073   | YP_001951777.1 | 0.22037  | CAG25973.1     | 0.2387   |
| NP_885141.1    | 0.00536  | NP_889454.1    | 1.60E-04 | YP_001630922.1 | 0.10913  |
| YP_001580781.1 | 0.11171  | AAX51692.1     | 0.02503  | AAX44143.1     | 1.40E-04 |
| AAX44141.1     | 0.00434  | YP_001269229.1 | 0.20503  | ACN67520.1     | 0.12558  |
| ZP_05293228.1  | 0.24225  | YP_002221018.1 | 0.13644  | CAM34325.1     | 1.60E-04 |
| CAM34326.1     | 0.00475  | CAM34290.1     | 0.01919  | YP_001753645.1 | 0.08491  |
| ZP_00050081.2  | 0.01257  | YP_002962940.1 | 1.40E-04 | YP_003068227.1 | 0.00276  |
| YP_001639417.1 | 0        | YP_002420998.1 | 0        | YP_001924536.1 | 1.40E-04 |
| ABD17673.1     | 0.02762  | YP_002497237.1 | 0.04629  | YP_001767322.1 | 0.01608  |
| YP_001832244.1 | 0.20999  | YP_002363007.1 | 0.17358  | YP_001522952.1 | 0.21192  |
| YP_001418687.1 | 0.2881   | AAX62365.1     | 0.00737  | AAX62366.1     | 0.05111  |
| AAX62367.1     | 0.04158  | ZP_01014394.1  | 0.01379  | ABN49886.1     | 0.02926  |
| CAM17816.1     | 0.3293   | ZP_06867920.1  | 0.30095  | ADD65215.1     | 0.35492  |
| ZP_01547720.1  | 0.00246  | AAX86994.1     | 1.50E-04 | ACR55656.1     | 1.50E-04 |
| ACR55659.1     | 1.40E-04 | YP_002551155.1 | 0.1611   | YP_001325891.1 | 0.01254  |
| CAA45483.1     | 0.02434  | NP_384683.1    | 1.40E-04 | YP_002824762.1 | 0.00836  |
| AAW78650.1     | 1.60E-04 | ABK01380.1     | 0.13992  | AAX62374.1     | 0.14175  |
| AAX62360.1     | 0.04943  | AAX62358.1     | 0.05837  | AAX62371.1     | 0.00925  |
| AAX62370.1     | 0.17074  | AAX62372.1     | 0.00557  | AAX62369.1     | 0.043    |
| AAX62349.1     | 1.40E-04 | AAX62343.1     | 0.03222  | AAX62338.1     | 0.14057  |
| AAX62362.1     | 0.02438  | AAX62337.1     | 0.20028  | AAX62354.1     | 1.40E-04 |
| AAX62347.1     | 0.00937  | AAX62341.1     | 0.00463  | AAX62344.1     | 0.00932  |
| AAX62319.1     | 0.014    | AAX62346.1     | 0.00586  | AAX62357.1     | 0.00925  |
| AAX62353.1     | 1.40E-04 | AAX62373.1     | 0.00468  | AAX62340.1     | 0.03676  |
| AAX62361.1     | 0.00801  | AAX62352.1     | 0.00457  | AAX62359.1     | 0.00952  |
| ACI32870.1     | 0.01495  | AAX62364.1     | 0.00202  | AAX62368.1     | 0.0046   |
| AAX62351.1     | 0.44913  | ACI32869.1     | 0.01415  | AAX62356.1     | 0.02632  |
| AAX62355.1     | 0.01775  | AAX62342.1     | 0.05396  | AAX62348.1     | 0.01908  |
| ZP_05086284.1  | 0.07163  | ZP_06896005.1  | 0.38542  | YP_002275047.1 | 0        |
| YP_001602640.1 | 0        | ZP_04755506.1  | 1.50E-04 | YP_001677871.1 | 0.0081   |
| ZP_04683656.1  | 0        | ZP_06574405.1  | 0        | ACX31703.1     | 0.36387  |
| ZP_05511872.1  | 0.28985  | ADI13133.1     | 0.2467   | CAJ87979.1     | 0.07078  |

### KS3 Group 3B

|               |          |               |         |            |         |
|---------------|----------|---------------|---------|------------|---------|
| ZP_06575977.1 | 1.40E-04 | ZP_04685211.1 | 0.0027  | AAW84194.1 | 0.25056 |
| AAX62315.1    | 0.26534  | ZP_06187358.1 | 0.37862 | ABK01333.1 | 0.20583 |
| ABI34077.1    | 0.16584  |               |         |            |         |

KS3 Group 3C

| Sequence       | Distance | Sequence       | Distance | Sequence       | Distance |
|----------------|----------|----------------|----------|----------------|----------|
| ACH88367.1     | 0.0184   | ACH88370.1     | 9.90E-04 | XP_974066.1    | 0        |
| EFA02059.1     | 0        | XP_002741902.1 | 0.0388   | XP_002742027.1 | 0.02335  |
| XP_002738672.1 | 0.04025  | XP_002737768.1 | 0.01012  | XP_002118336.1 | 0.03813  |
| XP_002118338.1 | 0.02     | XP_002118339.1 | 0.12161  | XP_002116740.1 | 0.0103   |
| XP_002116738.1 | 0.01651  | XP_001923643.1 | 0.04572  | CAF94659.1     | 0.06092  |
| ACZ55138.1     | 0.05176  | spP36189.1     | 0.06711  | NP_990486.1    | 0.00859  |
| spP12276.5     | 0.0032   | XP_001370508.1 | 0        | XP_001370481.1 | 0        |
| NP_032014.3    | 0        | EDL34809.1     | 0        | EDL34808.1     | 0        |
| BAE42492.1     | 0        | BAE27771.1     | 0        | AAA41145.1     | 0.00288  |
| CAA31780.1     | 1.40E-04 | spP12785.3     | 0        | NP_059028.1    | 0        |
| XP_001113076.1 | 0.02645  | AAH63242.1     | 0        | BAE06070.1     | 0        |
| pdb3HHDA       | 0        | AAS09886.1     | 0        | NP_004095.4    | 0        |
| AAA73576.1     | 0        | EAW89745.1     | 0        | AAC50259.1     | 0.02948  |
| XP_511758.2    | 0        | XP_001167297.1 | 0        | XP_001491342.1 | 0.05504  |
| XP_540497.2    | 0.06468  | NP_001012687.1 | 0.03565  | ABB36643.1     | 0.00293  |
| ABI95140.2     | 0.00292  | AAX51683.1     | 0.24329  | AAO19448.1     | 1.40E-04 |
| AAX55638.1     | 1.40E-04 | pdb2VZ8A       | 0        | NP_001093400.1 | 0        |
| XP_002124749.1 | 0.42981  | XP_001898484.1 | 0.10418  | XP_002639688.1 | 0.02403  |
| NP_492417.2    | 0.05361  | XP_001945449.1 | 0.05628  | XP_001942583.1 | 0.0168   |
| XP_001949630.1 | 0.68896  | XP_319941.4    | 0.03074  | XP_001658180.1 | 0.05381  |
| XP_001847047.1 | 0.12239  | ACJ13230.1     | 0        | NP_608748.1    | 0        |
| NP_001137778.1 | 0        | XP_002077984.1 | 1.20E-04 | XP_001968521.1 | 0.00289  |
| XP_002087781.1 | 1.40E-04 | XP_002052427.1 | 0.00887  | XP_002002897.1 | 0.01474  |
| XP_001988068.1 | 0.04473  | XP_001356821.2 | 0        | XP_002015181.1 | 0        |
| XP_002074274.1 | 0.03323  | XP_001962523.1 | 0.01185  | XP_002052428.1 | 0.02369  |
| XP_002074271.1 | 0.08123  | XP_002074273.1 | 1.50E-04 | XP_002015184.1 | 0        |
| XP_001356822.2 | 0        | XP_002077982.1 | 0.00302  | XP_002087780.1 | 0.0057   |
| XP_001968520.1 | 1.40E-04 | NP_647613.1    | 0.00282  | XP_001962524.1 | 0.0172   |
| XP_001988067.1 | 0.06508  | XP_002002898.1 | 0.01682  | XP_396268.2    | 0.15117  |
| XP_001605059.1 | 0.10582  | XP_002432036.1 | 0.13556  | XP_970417.2    | 0        |
| EFA11365.1     | 0        | XP_001945287.1 | 0.09118  | XP_001945190.1 | 0.09564  |
| XP_002434035.1 | 0.12841  | XP_002408797.1 | 0.05252  | XP_002403523.1 | 0.08576  |
| XP_002403503.1 | 1.50E-04 | XP_971525.1    | 0.31451  | XP_970599.1    | 0.41275  |
| XP_970448.2    | 1.40E-04 | EFA05203.1     | 1.40E-04 | EFA05248.1     | 0        |
| XP_971466.1    | 0        | XP_970384.2    | 1.40E-04 | EFA05204.1     | 1.60E-04 |
| XP_395426.3    | 0.29336  | XP_002429689.1 | 0.23965  | XP_001949072.1 | 0.19347  |
| XP_001605700.1 | 0.19859  | NP_001037478.1 | 0.15342  | NP_001037476.1 | 0.70632  |
| XP_002423718.1 | 0.81776  | XP_969531.1    | 0.89948  | XP_001942950.1 | 0.81275  |
| XP_001944600.1 | 0.55852  | XP_001944653.1 | 0.53966  | XP_001943289.1 | 0.32681  |
| XP_001951965.1 | 0.17346  | XP_001607838.1 | 0.22919  | XP_001607841.1 | 0.48805  |
| XP_001603340.1 | 0.33659  | XP_001659008.1 | 0.01055  | XP_321166.4    | 0.05991  |
| XP_001849863.1 | 0.04277  | XP_001997043.1 | 0.00379  | XP_001993620.1 | 0.00683  |

### KS3 Group 3C

|                |          |                |         |                |          |
|----------------|----------|----------------|---------|----------------|----------|
| XP_001997822.1 | 0.02556  | XP_002019333.1 | 0.00419 | XP_002137899.1 | 1.40E-04 |
| XP_002073880.1 | 0.01429  | NP_001015405.2 | 0.06182 | XP_001999184.1 | 0.0394   |
| XP_002054315.1 | 0.0221   | XP_001654967.1 | 0.27282 | XP_001654966.1 | 0.01512  |
| XP_001654965.1 | 0.00396  | XP_001845134.1 | 0.07674 | XP_001654963.1 | 0.23903  |
| XP_316979.4    | 0.29536  | XP_001845135.1 | 0.21821 | XP_002670671.1 | 0.72758  |
| ACB47226.1     | 0.28185  | XP_001629012.1 | 0.00468 | XP_001623604.1 | 0.01467  |
| XP_001632720.1 | 0.05523  | XP_001622503.1 | 0.05107 | XP_002369050.1 | 0.00391  |
| EEE21624.1     | 1.40E-04 | CAM34280.1     | 0.86834 | YP_003485578.1 | 0.57154  |
| BAD38873.1     | 0.32207  | ZP_06890218.1  | 0.237   | ZP_06415898.1  | 0.16756  |
| XP_001375980.1 | 0.20826  | XP_418587.2    | 0.01787 | XP_418588.2    | 0.02086  |
| XP_002190558.1 | 0.00473  | XP_002189754.1 | 0.0058  | CAG05482.1     | 0.15401  |
| CAG05481.1     | 0.78455  | XP_682975.3    | 0.1868  | NP_001041530.1 | 0.00269  |
| CAI21194.1     | 1.50E-04 | XP_002589799.1 | 0.21775 | XP_002599684.1 | 0.13918  |
| XP_002591573.1 | 0.24754  | XP_002734101.1 | 0.42303 | XP_001731756.1 | 0.81388  |
| XP_001874773.1 | 0.56729  | XP_002469775.1 | 0.3848  | XP_002391757.1 | 0.23991  |
| XP_002472355.1 | 0.2282   |                |         |                |          |

### KS3 Group 3D

| Sequence    | Distance | Sequence       | Distance | Sequence       | Distance |
|-------------|----------|----------------|----------|----------------|----------|
| XP_645909.1 | 0.28141  | EFA85171.1     | 1.43E-01 | EFA78203.1     | 0.12412  |
| EFA82680.1  | 0.23353  | EFA77399.1     | 0.02035  | EFA77422.1     | 0.01696  |
| EFA82790.1  | 0.06749  | EFA75922.1     | 0.03218  | EFA82534.1     | 0.00014  |
| EFA82529.1  | 0.00274  | EFA75463.1     | 0.30423  | EFA86658.1     | 0.21046  |
| EFA83735.1  | 0.24809  | XP_643790.1    | 0.04613  | XP_643784.1    | 0.00014  |
| EFA83876.1  | 0.14424  | EFA82771.1     | 0.01185  | EFA82769.1     | 0.01617  |
| XP_628867.1 | 0.02851  | XP_628865.1    | 0.00148  | XP_638811.1    | 0.00668  |
| XP_638813.1 | 0.01323  | XP_646104.1    | 0.17947  | XP_635303.1    | 0.05501  |
| XP_635304.1 | 0.04819  | XP_646445.1    | 0.28197  | XP_637425.1    | 0.03672  |
| XP_637427.1 | 5.10E-02 | XP_645557.1    | 0.07179  | XP_001733036.1 | 0.04293  |
| XP_645569.1 | 0.0167   | XP_001732962.1 | 0.02291  | XP_001732963.1 | 0.02032  |
| XP_629652.2 | 0.34703  | XP_635742.1    | 0.02808  | XP_001733033.1 | 0.02088  |
| XP_635590.1 | 0.04362  | XP_635575.2    | 0.02662  | XP_635580.1    | 0.01909  |
| XP_635490.1 | 0.00261  | XP_635494.1    | 0.00014  | XP_635588.1    | 0.02162  |
| XP_635593.1 | 0.03573  | XP_635589.1    | 0.02806  | XP_001732967.1 | 0.38756  |
| XP_644952.2 | 0.17999  | XP_640701.1    | 0.18939  | XP_644930.2    | 1.02E-01 |
| XP_636757.1 | 3.01E-01 | XP_644907.1    | 0.25049  | XP_001733001.1 | 0.00016  |
| XP_640415.1 | 0.01316  |                |          |                |          |

KS3 Group 3E

| Sequence       | Distance | Sequence       | Distance | Sequence       | Distance |
|----------------|----------|----------------|----------|----------------|----------|
| AAR92222.1     | 0.48837  | AAR92221.1     | 0.39965  | XP_002478229.1 | 0.41151  |
| XP_002566266.1 | 0.21459  | EFE36394.1     | 0.00557  | EFE38442.1     | 1.50E-04 |
| XP_001403832.1 | 0.11495  | XP_965600.1    | 0.06054  | CBI52337.1     | 0.01099  |
| XP_001211072.1 | 0.01305  | XP_001261656.1 | 1.40E-04 | EER28768.1     | 0.01059  |
| XP_002541850.1 | 0.24487  | XP_001248627.1 | 0.03234  | XP_002567447.1 | 0.25084  |
| ADF28669.1     | 0.11223  | XP_002488004.1 | 0.07144  | XP_002482120.1 | 0.08704  |
| ACZ57548.1     | 0.20632  | XP_001219467.1 | 0.16028  | XP_001389118.1 | 0.25515  |
| XP_002152964.1 | 0.03274  | XP_002480264.1 | 0.0146   | ADF28670.1     | 0.17171  |
| XP_001801515.1 | 0.50581  | XP_001589519.1 | 0.36383  | XP_001545612.1 | 0.00251  |
| AAR90245.1     | 0.00892  | XP_001799782.1 | 0.57301  | XP_002483036.1 | 0.42155  |
| XP_001388555.1 | 0.35955  | XP_001821644.1 | 0.01667  | XP_002379799.1 | 1.50E-04 |
| XP_002485885.1 | 0.22944  | XP_958169.1    | 0.09047  | CAP65540.1     | 0.15144  |
| XP_001215234.1 | 0.11418  | XP_001228574.1 | 0.1162   | XP_001905772.1 | 0.41233  |
| XP_001397040.1 | 0.10888  | XP_002560839.1 | 0.14185  | XP_001805097.1 | 0.34385  |
| XP_001942161.1 | 0.36826  | XP_002487169.1 | 0.1803   | XP_661216.1    | 0.36219  |
| XP_001389116.1 | 0.11949  | AAR90266.1     | 0.10965  | ACB12550.1     | 0.02796  |
| AAR92218.1     | 0        | AAD43562.2     | 0        | ABD72181.1     | 1.40E-04 |
| XP_364800.2    | 0        | XP_001521951.1 | 0        | XP_001910647.1 | 0.15611  |
| XP_001799912.1 | 0.16779  | EEU34994.1     | 0.25057  | XP_682179.1    | 0.43108  |
| XP_002568526.1 | 0.50282  | XP_664035.1    | 0.75014  | XP_682274.1    | 0.07633  |
| EFE33181.1     | 0.14442  | XP_002842777.1 | 0.13603  | XP_002557971.1 | 0.38651  |
| XP_002376417.1 | 0.3038   | XP_001816589.1 | 0.00281  | XP_002383512.1 | 1.60E-04 |
| XP_001395346.1 | 0.19089  | XP_001258284.1 | 0.07523  | XP_002567168.1 | 0.18242  |
| XP_001825164.1 | 0.24415  | XP_002381864.1 | 0.03018  | XP_002844003.1 | 0.21576  |
| XP_001390513.1 | 0.28662  | XP_001393844.1 | 0.19403  | XP_001258949.1 | 0.26182  |
| XP_748574.1    | 0.00565  | EDP53389.1     | 0.00568  | XP_001393447.1 | 0.49299  |
| XP_002372966.1 | 0.00545  | XP_001817817.1 | 1.60E-04 | XP_001217722.1 | 0.23202  |
| EFE44178.1     | 0.12865  | EFE34630.1     | 0.40373  | XP_001400073.1 | 0.43468  |
| XP_001391193.1 | 0.50682  | XP_001904308.1 | 0.32323  | XP_001827403.1 | 0.00277  |
| XP_002384601.1 | 1.40E-04 | XP_001274957.1 | 0.16981  | XP_001215858.1 | 0.18107  |
| XP_381966.1    | 0.21474  | XP_001942300.1 | 0.15795  | EFE41038.1     | 2.30E-04 |
| EFE31625.1     | 0.00544  | XP_001275051.1 | 0.00486  | XP_001241816.1 | 0.07375  |
| XP_001262991.1 | 1.50E-04 | XP_754155.1    | 0.00285  | EDP52288.1     | 1.40E-04 |
| XP_001801326.1 | 0.14645  | AAR90268.1     | 0.05904  | EEH10010.1     | 0.02307  |
| EER38848.1     | 0.03133  | XP_001394543.1 | 0.14799  | EEU36919.1     | 0.23049  |
| EER36725.1     | 0.04854  | XP_001588926.1 | 0.87203  | EEH02664.1     | 0.01967  |
| AAR90267.1     | 0.40792  | XP_001904579.1 | 0.52354  | EEU36061.1     | 0.2826   |
| AAR92219.1     | 0.12781  | EEU34613.1     | 0.13669  | XP_749851.1    | 0.19424  |
| XP_001219308.1 | 0.23487  | XP_001216793.1 | 0.32796  | AAR90269.1     | 0.45423  |
| XP_001261668.1 | 0.04135  | XP_747167.1    | 0.00253  | EDP49172.1     | 1.40E-04 |
| XP_001825712.1 | 0.33392  | AAR90246.1     | 0        | XP_001557060.1 | 0        |
| XP_001595995.1 | 0.13333  | XP_001806097.1 | 0.22305  | CBI59288.1     | 0.22997  |

KS3 Group 3E

|                |          |                |          |                |          |
|----------------|----------|----------------|----------|----------------|----------|
| XP_664688.1    | 0.17197  | XP_001265535.1 | 0.01166  | XP_001213896.1 | 0.00437  |
| ADF28668.2     | 0.12315  | AAAY32931.1    | 0.27489  | AAAY27746.1    | 0.0841   |
| EEY23012.1     | 0.35803  | XP_383516.1    | 0.03141  | EEU48982.1     | 0.00534  |
| AAR92220.1     | 0.00854  | XP_001210368.1 | 0.22027  | XP_001908855.1 | 0.21659  |
| XP_001394029.1 | 0.09771  | XP_002147654.1 | 0.3356   | XP_001210999.1 | 0.19744  |
| XP_002847685.1 | 0.01374  | EFE33589.1     | 0.0027   | EFE44717.1     | 0.0027   |
| XP_001398521.1 | 0.02674  | CAQ16344.1     | 0.01815  | XP_001824383.1 | 0.00284  |
| XP_002381496.1 | 0.00257  | XP_664626.1    | 0.20348  | EEY18883.1     | 0.33729  |
| XP_002478535.1 | 0.21832  | XP_001826816.1 | 0.00493  | XP_002385245.1 | 1.50E-04 |
| AAT92024.1     | 0.22088  | XP_001271445.1 | 0.07933  | XP_001262312.1 | 0.02476  |
| EDP55391.1     | 0.00264  | XP_751268.2    | 1.50E-04 | XP_001401800.1 | 0.16001  |
| AAS98203.1     | 0.30377  | XP_001394930.1 | 0.14991  | AAS98197.1     | 0.12682  |
| XP_001218239.1 | 0.54615  | XP_001822398.1 | 0.00265  | XP_002382491.1 | 1.40E-04 |
| XP_659388.1    | 0.36052  | XP_001556768.1 | 0        | AAR90240.1     | 0        |
| XP_001585402.1 | 0.35431  | AAR92215.1     | 0.21018  | XP_001223282.1 | 0.11898  |
| XP_001545728.1 | 0.6113   | XP_002147272.1 | 0.14185  | ACN22186.1     | 0.19363  |
| XP_001912726.1 | 0.2198   | XP_002149829.1 | 0.21306  | XP_001396431.1 | 0.1716   |
| AAX62321.1     | 0.238    | XP_390640.1    | 0.00297  | AAS57293.1     | 0.00285  |
| XP_753141.2    | 0.10892  | XP_001270376.1 | 0.06185  | XP_001274946.1 | 0.18858  |
| tpeCAG29113.1  | 1.40E-04 | XP_001412451.1 | 0.11187  | BAC20564.1     | 0.07735  |
| ABA02239.1     | 0.03215  | spQ0C8M3.2     | 0        | XP_001209263.1 | 0        |
| spQ9Y8A5.1     | 1.40E-04 | XP_002486701.1 | 0.30447  | tpeCAH59194.1  | 0.00305  |
| XP_001415348.1 | 1.40E-04 | CAC44633.1     | 0.03848  | AAR92208.1     | 0.01759  |
| XP_001221453.1 | 0.17833  | XP_001269050.1 | 0.10328  | XP_001228890.1 | 0.1152   |
| AAR90241.1     | 0        | XP_001546007.1 | 0        | XP_002850361.1 | 0.01121  |
| EFE30182.1     | 1.40E-04 | EFE41543.1     | 1.40E-04 | XP_001818832.1 | 0.00979  |
| XP_002380257.1 | 1.60E-04 | EFE40994.1     | 0        | EFE33214.1     | 0        |
| XP_002842735.1 | 0.02634  | XP_001400817.1 | 0.26281  | AAV66106.1     | 0.13729  |
| AAR92216.1     | 0.22713  | XP_002844742.1 | 1.32324  | XP_002557403.1 | 0.08331  |
| EDP53404.1     | 0.1473   | XP_361336.2    | 0.33045  | EEH16752.1     | 0        |
| EEH50245.1     | 0        | AAS98204.1     | 0.28201  | XP_001392496.1 | 0.00719  |
| XP_001270445.1 | 0.00313  | XP_001934577.1 | 0.21799  | XP_001905191.1 | 0.22288  |
| XP_001904548.1 | 0.23945  | XP_001798193.1 | 0.066    | AAR90270.1     | 0.0645   |
| XP_002153037.1 | 0.05934  | XP_002483871.1 | 0.07311  | EEY15220.1     | 0.23116  |
| XP_002544298.1 | 0.07592  | EER27752.1     | 1.40E-04 | XP_001242733.1 | 0.00522  |
| XP_001220460.1 | 0.47967  | XP_001790998.1 | 0.4595   | XP_002847329.1 | 0.25645  |
| XP_001221381.1 | 0.31104  | XP_002560003.1 | 0.1029   | XP_001412418.1 | 1.40E-04 |
| CAG28797.1     | 1.40E-04 | CAG28798.1     | 0        | XP_001412433.1 | 0        |
| XP_001270543.1 | 0.10146  | AAR90239.1     | 0        | XP_001560667.1 | 0        |
| XP_001399961.1 | 0.16454  | XP_001394625.1 | 0.14725  | AAR90242.1     | 0        |
| CAP58786.1     | 0        | XP_001545403.1 | 1.40E-04 | AAR90271.1     | 0.23052  |
| AAT28740.1     | 0        | AAR92217.1     | 0        | AAS57294.1     | 0.10528  |
| ACS68554.1     | 0.13879  | EEU43643.1     | 0.0616   | XP_002561691.1 | 0.22471  |



KS3 Group 3E

|                |          |                |          |                |          |
|----------------|----------|----------------|----------|----------------|----------|
| XP_001210411.1 | 0.24288  | XP_001276488.1 | 0.01258  | ABS87601.1     | 0        |
| EDP49155.1     | 0        | XP_747151.2    | 0        | XP_367447.2    | 0.17341  |
| XP_963238.1    | 0.01861  | CBI55367.1     | 0.01435  | XP_001228019.1 | 0.15692  |
| XP_001904161.1 | 0.18613  | XP_002486604.1 | 0.25341  | AAS46233.1     | 0.22885  |
| EEY18889.1     | 0.25222  | XP_001818816.1 | 0        | XP_002380243.1 | 0        |
| XP_681681.1    | 0.02509  | XP_001258701.1 | 0.03105  | XP_002843368.1 | 0.10714  |
| XP_002583532.1 | 0.09907  | XP_001407793.1 | 1.60E-04 | tpeCAH59193.2  | 1.40E-04 |
| XP_001521895.1 | 0.52918  | CAO91861.1     | 0.25795  | XP_002148352.1 | 0.30348  |
| CAL69597.1     | 0.23794  | XP_002379959.2 | 0        | EED51183.1     | 0        |
| BAG82673.1     | 0.03784  | CBI54140.1     | 0.23812  | XP_002843704.1 | 0.03005  |
| XP_001273596.1 | 0.02256  | XP_001942484.1 | 0.34236  | XP_002567442.1 | 0.21519  |
| XP_001220242.1 | 0.46337  | XP_658640.1    | 0.15059  | XP_001225294.1 | 0.17029  |
| XP_001216280.1 | 0.0679   | XP_659639.1    | 0.27028  | XP_664395.1    | 0.24713  |
| XP_002846667.1 | 0.08369  | EER25595.1     | 0        | XP_001246128.1 | 0        |
| XP_002379026.1 | 0.00271  | XP_001823613.1 | 0.00261  | XP_002567554.1 | 0.07007  |
| XP_001227512.1 | 0.13847  | AAR90258.1     | 0.39786  | XP_001908964.1 | 0.04513  |
| XP_001224361.1 | 0.0559   | XP_959122.1    | 0.00831  | CBI59477.1     | 0.02436  |
| AAO62426.1     | 0.26073  | XP_001273842.1 | 0.23377  | XP_001393508.1 | 0.18452  |
| BAC20566.1     | 0.09353  | ABA02240.1     | 0.0723   | XP_001209270.1 | 0.01951  |
| AAD34559.1     | 0.0142   | XP_002847170.1 | 0.33476  | XP_002486631.1 | 0.18148  |
| XP_001904919.1 | 0.21515  | XP_001795280.1 | 0.3573   | AAR90257.1     | 0.01391  |
| ABB76806.1     | 1.50E-04 | XP_001219267.1 | 0.1641   | CBI53020.1     | 0.03607  |
| XP_955938.1    | 0.0644   | XP_001905278.1 | 0.08505  | EEY20202.1     | 0.20635  |
| EEU37129.1     | 0.17101  | XP_001209753.1 | 0.18416  | XP_001396381.1 | 0.26875  |
| XP_002559294.1 | 1.50E-04 | AAX62327.1     | 0.08953  | XP_001824541.1 | 0.2542   |
| XP_002794432.1 | 0.00784  | EEH17875.1     | 1.60E-04 | EEH46751.1     | 0.00538  |
| XP_001597801.1 | 1.40E-04 | EEY14055.1     | 0.77062  | AAR90244.1     | 0.04303  |
| XP_001801317.1 | 0.39519  | XP_001226673.1 | 0.14172  | XP_958135.2    | 0.03856  |
| CBI53318.1     | 0.01302  | XP_360215.2    | 0.22343  | XP_361278.2    | 0.35479  |
| XP_001395761.1 | 0.23421  | XP_002567530.1 | 0.11154  | XP_002151045.1 | 0.03538  |
| XP_002342001.1 | 0.04238  | BAD97694.1     | 0.39578  | XP_001589724.1 | 0.29753  |
| XP_001558952.1 | 0        | AAR90238.1     | 0        | XP_001597611.1 | 0.06991  |
| EEU37200.1     | 0.29067  | XP_661214.1    | 0        | tpeCBF75781.1  | 0        |
| XP_001936632.1 | 0.14009  | XP_385970.1    | 0.00286  | AAS57290.1     | 0.00259  |
| XP_002151741.1 | 0.37241  | EEU34973.1     | 0.24957  | XP_001591652.1 | 0.36302  |
| XP_001592682.1 | 0.32642  | EEY15584.1     | 0.18574  | XP_001410106.1 | 1.40E-04 |
| XP_001522321.1 | 1.50E-04 | EEU47356.1     | 0.01502  | AAR92214.1     | 0.04471  |
| AAS57292.1     | 1.40E-04 | XP_388971.1    | 1.50E-04 | XP_001904114.1 | 0.11464  |
| XP_002843932.1 | 0.14026  | XP_682486.1    | 0        | tpeCBF82304.1  | 0        |
| XP_002846808.1 | 0.05879  | XP_002560737.1 | 0.13339  | XP_001395352.1 | 0.08294  |
| XP_001394423.1 | 0.07072  | XP_001229617.1 | 0.42328  | XP_001408070.1 | 0.11303  |
| BAD83684.1     | 0.02997  | AAR90261.1     | 0.03946  | XP_001934477.1 | 0.04417  |
| XP_001270321.1 | 0.3071   | XP_002585309.1 | 0.26795  | XP_001394579.1 | 0.12334  |

KS3 Group 3E

|                |          |                |          |                |          |
|----------------|----------|----------------|----------|----------------|----------|
| XP_001209968.1 | 0.12035  | AAR92213.1     | 0.41734  | AA41231.1      | 0.38682  |
| AAR90262.1     | 0.2359   | XP_002482833.1 | 0.17094  | XP_002485355.1 | 0.10981  |
| ADA79525.1     | 0.11494  | AAR85531.1     | 0.19067  | AAB08104.3     | 0.11525  |
| XP_001273762.1 | 0.0546   | XP_001258783.1 | 0.01485  | XP_748462.2    | 0        |
| EDP53518.1     | 0        | XP_001816573.1 | 1.40E-04 | XP_002383534.1 | 1.40E-04 |
| XP_001217710.1 | 0.36432  | XP_002561451.1 | 0.11619  | XP_001937136.1 | 0.34319  |
| XP_002483869.1 | 0.02575  | XP_002153035.1 | 0.07756  | XP_001942160.1 | 1.0394   |
| XP_001397313.1 | 0.17703  | AAT92023.1     | 0.08971  | XP_001404136.1 | 0.43992  |
| XP_002558882.1 | 0.20488  | AAR90260.1     | 0.25458  | ABQ42548.1     | 0.15205  |
| XP_002486489.1 | 0.24979  | XP_001276282.1 | 0.04669  | XP_001212624.1 | 0.01296  |
| XP_001209965.1 | 0.07988  | XP_001394581.1 | 0.15462  | XP_002543416.1 | 0.07061  |
| XP_001243573.1 | 0.00936  | EER29760.1     | 0.00162  | EEH04903.1     | 0.01379  |
| EER44976.1     | 0.20688  | XP_001543057.1 | 0.15175  | EEQ83870.1     | 0.02849  |
| XP_002622046.1 | 0.00669  | XP_002795995.1 | 0.04616  | EEH44268.1     | 0.00278  |
| EEH19899.1     | 0.00271  | XP_001394387.1 | 0.55695  | XP_001595502.1 | 0.46216  |
| XP_001402359.1 | 0.3473   | XP_001547938.1 | 1.40E-04 | AAR90237.1     | 1.40E-04 |
| XP_001390395.1 | 0.21017  | XP_001273186.1 | 0.05825  | EDP53793.1     | 0        |
| XP_749265.2    | 0        | XP_001265690.1 | 0.00216  | XP_001596140.1 | 0.40168  |
| AAX62303.1     | 1.50E-04 | AAX62363.1     | 0.00492  | XP_001819018.1 | 0.05991  |
| XP_002381999.1 | 1.50E-04 | XP_001825065.1 | 0.25598  | XP_001399183.1 | 0.30744  |
| XP_001268490.1 | 0.25618  | XP_001587412.1 | 0.27579  | XP_001934016.1 | 0.23459  |
| XP_001396949.1 | 0.32678  | BAE80697.1     | 0.03469  | AAR90264.1     | 0.0432   |
| XP_001930443.1 | 0.03033  | XP_001939440.1 | 0.1559   | XP_002382732.1 | 0.20865  |
| XP_002487607.1 | 0.18335  | XP_001396752.1 | 0.21021  | XP_002146288.1 | 0.31958  |
| EEU41127.1     | 0.17985  | XP_001407886.1 | 0.27498  | AAR92209.1     | 0.02998  |
| AAS57287.1     | 0.02034  | XP_384870.1    | 0.00249  | AAR90263.1     | 0.23658  |
| XP_362812.2    | 0.23047  | XP_001597598.1 | 0.30411  | XP_002485662.1 | 0.49178  |
| AAR92212.1     | 0.14229  | EEY15605.1     | 0.04457  | AAR90265.1     | 0.477    |
| AA440862.1     | 0.17613  | XP_368438.2    | 0.21122  | XP_001558633.1 | 0.46604  |
| XP_362330.2    | 0.3871   | CBI52831.1     | 1.39972  | XP_001589516.1 | 0.60008  |
| XP_364744.2    | 0.78168  | XP_002485500.1 | 0.28319  | AAS57885.1     | 1.40E-04 |
| XP_390724.1    | 0.0083   | XP_002146115.1 | 0.28887  | XP_362763.2    | 0.26549  |
| ACM42406.1     | 0.0311   | ACD39774.1     | 0.12373  | XP_002376296.1 | 0.1469   |
| XP_001934720.1 | 0.06437  | ACD39758.1     | 0.16344  | AAS57289.1     | 0.19155  |
| ACD39767.1     | 0.07966  | XP_002568274.1 | 0.1931   | XP_382572.1    | 0        |
| ABB90283.1     | 0        | XP_002150998.1 | 0.32692  | ACM42412.1     | 0.11388  |
| XP_001225803.1 | 0.27875  | XP_002488696.1 | 0.37122  | XP_369011.2    | 0.46285  |
| AAR90259.1     | 0.70997  | XP_001223689.1 | 0.14552  | XP_660151.1    | 0.15391  |
| XP_001552860.1 | 0        | AAR90247.1     | 0        | XP_388384.1    | 0.04288  |
| XP_002152245.1 | 0.03535  | XP_002485809.1 | 0.01634  |                |          |

KS3 Group 3F

| Sequence       | Distance | Sequence       | Distance | Sequence       | Distance |
|----------------|----------|----------------|----------|----------------|----------|
| BAG69100.1     | 0.32014  | YP_003075651.1 | 0.6372   | YP_003657636.1 | 0.12468  |
| YP_001702947.1 | 0.10441  | YP_119236.1    | 0.07021  | YP_120537.1    | 0.11889  |
| ZP_04747288.1  | 0.21536  | YP_001104811.1 | 0.41481  | ZP_01460630.1  | 0        |
| CAG28678.1     | 0        | YP_632255.1    | 0.07265  | BAG68980.1     | 0.48275  |
| YP_890975.1    | 0.36035  | NP_349947.1    | 0.45863  | ZP_04668456.1  | 0.42333  |
| ZP_02380518.1  | 0.73958  | ABG57047.1     | 1.40E-04 | ACB71244.1     | 1.40E-04 |
| YP_529192.1    | 0.16033  | ACZ54324.1     | 1.50E-04 | ACZ54291.1     | 0.00965  |
| ABL86391.1     | 0.07689  | ZP_06775082.1  | 0.07416  | ACI24638.1     | 0.01241  |
| ACI24628.1     | 0.05584  | ACI24631.1     | 0.01635  | ACI24640.1     | 1.40E-04 |
| ZP_06279092.1  | 0        | YP_001822326.1 | 0        | ZP_04697681.1  | 0        |
| ZP_04712879.1  | 0        | ACW82529.1     | 0.022    | ACZ54328.1     | 0.04275  |
| ACN13117.1     | 0.00539  | ZP_05802686.1  | 0.02949  | ZP_06271740.1  | 0.03307  |
| ZP_04706130.1  | 0.06061  | ZP_05489284.1  | 0.01292  | ZP_04994792.1  | 0.02172  |
| YP_001537255.1 | 1.50E-04 | ACZ54298.1     | 1.40E-04 | YP_003040036.1 | 0.5188   |
| YP_003190825.1 | 0.26267  | CAM34287.1     | 0.38486  | ACF54731.1     | 0.10095  |
| ACF54737.1     | 0.15054  | ZP_04622166.1  | 0.26993  | ZP_04614380.1  | 0.15145  |
| YP_610922.1    | 0.76695  | BAA92854.1     | 0.61851  | ZP_00517721.1  | 0.51986  |
| ZP_05029233.1  | 0.27731  | AAW55400.1     | 0.52623  | ADD65306.1     | 0.00469  |
| AAW55401.1     | 0.38813  | YP_001415298.1 | 0.34876  | ABP68562.1     | 0.31613  |
| CAM17815.1     | 0.07684  | ABI34079.1     | 0.12093  | AAX62312.1     | 0.08007  |
| ACV30045.1     | 0.52329  | ABP68563.1     | 0.21923  | CAM34288.1     | 0.00736  |
| CAM34289.1     | 0.00631  | NP_867299.1    | 0.16431  | CAM17818.1     | 0.1445   |
| AAW84208.1     | 0.11294  | CAM34268.1     | 0.05742  | CAM34269.1     | 0.00456  |
| CAM34271.1     | 0.00911  | CAM34272.1     | 0.00913  | CAM34270.1     | 1.50E-04 |
| ADF57410.1     | 0.11564  | ADF57398.1     | 0.00753  | ADF57402.1     | 0.00586  |
| ZP_03127198.1  | 0.13892  | ZP_02927635.1  | 0.09987  | AAX62336.1     | 0.34311  |
| AAX62302.1     | 0.03425  | AAX62316.1     | 0.00175  | EFA86495.1     | 0.24352  |
| XP_635518.1    | 0.30875  | XP_002610053.1 | 0.05899  | XP_002598386.1 | 1.50E-04 |
| XP_002598380.1 | 0.01376  | XP_002589000.1 | 0.0027   | XP_796777.2    | 0.2733   |
| XP_002733151.1 | 0.17526  | YP_001983652.1 | 0.40048  | AAQ91800.1     | 0.28323  |
| XP_002680948.1 | 0.77998  | XP_001742454.1 | 0.78256  | ZP_06385951.1  | 0.94393  |
| AAX62334.1     | 0.63811  | XP_793564.2    | 0.00574  | tpgDAA05847.1  | 0.0361   |
| XP_002608071.1 | 0.10622  | XP_002605913.1 | 0.00452  | XP_002605916.1 | 0.00739  |
| XP_002610103.1 | 0.00349  | XP_002610100.1 | 0.00766  | ZP_04748543.1  | 0.08633  |
| YP_001071136.1 | 1.40E-04 | YP_639998.1    | 0.00276  | NP_302536.1    | 0.07231  |
| YP_001850080.1 | 0        | YP_905929.1    | 0        | ZP_04748272.1  | 0.03622  |
| ZP_06518431.1  | 0.54988  | ZP_06451347.1  | 0        | ZP_03538031.1  | 0        |
| NP_856601.1    | 0.00278  | NP_337514.1    | 0        | NP_217447.1    | 0        |
| ZP_06434232.1  | 0        | ZP_03417087.1  | 0        | ZP_06522487.1  | 0        |
| YP_001288874.1 | 0        | ZP_03421485.1  | 0        | ZP_06514423.1  | 0        |
| YP_003030982.1 | 0        | ZP_03426294.1  | 0        | ZP_05773741.1  | 0        |
| YP_001134659.1 | 0.1582   | YP_953936.1    | 0.10251  | YP_001134657.1 | 0.06494  |

KS3 Group 3F

|                |          |                |          |                |          |
|----------------|----------|----------------|----------|----------------|----------|
| YP_953934.1    | 0.05074  | ZP_05498240.1  | 0.10693  | ZP_05498235.1  | 0.10056  |
| ACJ83241.1     | 1.40E-04 | NP_854075.1    | 1.60E-04 | ZP_06431528.1  | 0        |
| NP_214919.1    | 0        | ZP_04979415.1  | 0        | ZP_06448546.1  | 0        |
| YP_001286355.1 | 0        | ZP_06503479.1  | 0        | ZP_03431243.1  | 0        |
| ZP_06515851.1  | 0        | ZP_05771044.1  | 0        | NP_334828.1    | 0        |
| ZP_05762744.1  | 0        | AAW84195.1     | 0.25839  | AAX62323.1     | 0.21419  |
| AAX62318.1     | 0.02874  | AAX62306.1     | 0.09433  | AAX62331.1     | 0.53426  |
| YP_001799554.1 | 0.17109  | YP_249908.1    | 0.09175  | NP_739315.1    | 0.04228  |
| NP_602063.1    | 1.60E-04 | AAO39780.1     | 0.01491  | YP_001139681.1 | 1.50E-04 |
| ZP_04835147.1  | 0        | ZP_03711572.1  | 0        | NP_940497.1    | 0.14106  |
| ZP_03970768.1  | 1.60E-04 | ZP_03919471.1  | 0.00518  | ZP_03977828.1  | 0.21756  |
| ZP_05708535.1  | 0.12388  | ZP_06837668.1  | 0.1169   | ZP_03935785.1  | 0.0845   |
| YP_002835897.1 | 0.06573  | ZP_03931949.1  | 0.05629  | ZP_03919872.1  | 1.40E-04 |
| ZP_05365264.1  | 0.0026   | AAR89981.1     | 0.1066   | CBB12338.1     | 0.05244  |
| YP_002781135.1 | 0.01353  | YP_704020.1    | 1.50E-04 | ZP_06831405.1  | 0.10111  |
| YP_002763668.1 | 1.50E-04 | ZP_04386357.1  | 0.0053   | AAO39783.1     | 0.01485  |
| YP_116395.1    | 0.22219  | YP_003645168.1 | 0.24607  | YP_003271455.1 | 0.15855  |
| YP_001700934.1 | 0.09265  | YP_956411.1    | 0.03922  | YP_001132439.1 | 0.06417  |
| NP_301199.1    | 0.04359  | ZP_03434899.1  | 0        | ZP_04926618.1  | 0        |
| NP_218317.1    | 0        | ZP_03538967.1  | 0        | ZP_05770496.1  | 0        |
| NP_857467.1    | 0        | YP_979941.1    | 0        | ZP_03422974.1  | 0.00682  |
| YP_001853623.1 | 0        | YP_908332.1    | 0        | ZP_04747234.1  | 0.01148  |
| ZP_05227506.1  | 0.01362  | ZP_05214792.1  | 0.0026   | YP_879512.1    | 0        |
| NP_959154.1    | 0        | ZP_06849349.1  | 0.01764  | YP_642170.1    | 0        |
| YP_001073645.1 | 0        | YP_890605.1    | 0.07161  | YP_003660030.1 | 0.33998  |
| YP_003102526.1 | 0.45071  | ZP_06412919.1  | 0.32624  | ZP_06238974.1  | 0.24571  |
| ZP_05536241.1  | 0.04551  | YP_003493390.1 | 0.08455  | YP_003344192.1 | 0.20363  |
| YP_003302314.1 | 0.09291  | ACZ54281.1     | 0.11321  | AAZ77673.1     | 0.16397  |
| YP_001107644.1 | 0.28623  | ABY83164.1     | 0.30936  | AAM77986.1     | 0.12922  |
| ACZ54292.1     | 0.01466  | YP_001539688.1 | 1.50E-04 | ACZ54299.1     | 1.40E-04 |
| XP_002841993.1 | 0.30123  | ABS11029.1     | 0        | ACM48250.1     | 0        |
| ABS11017.1     | 0.10179  | ABS11028.1     | 0.03627  | ABS11033.1     | 0.02441  |
| ABS11032.1     | 0.04121  | AAAY46446.1    | 0.21155  | XP_001402408.1 | 0.0666   |
| AAB49684.1     | 0.05088  | XP_002560460.1 | 0.02668  | XP_001791162.1 | 0.04477  |
| CAB44720.1     | 0.12332  | AAR90279.1     | 0.4423   | AAS98200.1     | 0.26355  |
| XP_002849666.1 | 0.07045  | EFE34898.1     | 1.40E-04 | EFE38467.1     | 0.00541  |
| AAK48943.1     | 0.08355  | XP_001273093.1 | 0.07365  | spP22367.1     | 0.0369   |
| CAA65133.1     | 0.03359  | XP_002564832.1 | 0.02565  | XP_001826575.1 | 0        |
| XP_002385535.1 | 0        | AAC23536.1     | 0.01922  | AAP33839.2     | 0.25607  |
| AAC49814.1     | 0        | XP_001215453.1 | 0        | BAA20102.2     | 0.00825  |
| ABS11021.1     | 0.00973  | ABS11025.1     | 1.40E-04 | ABS11018.1     | 1.40E-04 |
| ABQ11383.1     | 1.60E-04 | ABS11019.1     | 1.40E-04 | ABQ11384.1     | 1.40E-04 |
| ACM48251.1     | 0        | ABS11024.1     | 0        | ABS11015.1     | 0.00482  |

KS3 Group 3F

|                |          |                |          |                |          |
|----------------|----------|----------------|----------|----------------|----------|
| ABS11023.1     | 1.40E-04 | ABS11031.1     | 0.01189  | ABQ11382.1     | 0.11762  |
| ABS11027.1     | 0.02485  | ABQ11381.1     | 0.06603  | ABS11016.1     | 0.02816  |
| ABS11014.1     | 0.14563  | AAX35547.1     | 0.14241  | YP_640635.1    | 0.00281  |
| YP_001071753.1 | 0.00274  | YP_001133955.1 | 0.06419  | YP_954639.1    | 0.04315  |
| ZP_06914033.1  | 1.50E-04 | ZP_06914030.1  | 1.40E-04 | ABY66019.1     | 0.12481  |
| ACN64831.1     | 0.13832  | YP_001507916.1 | 0.30393  | BAF92601.1     | 0.16705  |
| BAI44052.1     | 0.24913  | AAM70355.1     | 0.07669  | YP_001536890.1 | 1.60E-04 |
| ACZ54297.1     | 1.40E-04 | ZP_04607387.1  | 0.1007   | AAK83194.1     | 0.16257  |
| ZP_06567199.1  | 1.40E-04 | YP_001107472.1 | 1.60E-04 | AAW84192.1     | 0.03742  |
| ABK01401.1     | 0.10207  | YP_003339919.1 | 0.57269  | ZP_06889851.1  | 0.62794  |
| YP_712779.1    | 0.67936  | ZP_06720760.1  | 0.6629   | ZP_06143605.1  | 0.50943  |
| YP_001452456.1 | 0        | ZP_04003365.1  | 0        | NP_754350.1    | 0        |
| NP_754345.1    | 0.62679  | YP_002479916.1 | 0.62172  | YP_003656370.1 | 0.57598  |
| YP_002911534.1 | 0.08288  | ZP_02909704.1  | 0.0528   | YP_439431.1    | 0        |
| ZP_05590816.1  | 0        | ZP_02384633.1  | 0        | ZP_02370748.1  | 0        |
| ZP_02466489.1  | 0.00312  | YP_001075600.1 | 0        | ZP_02475135.1  | 0        |
| ZP_04522344.1  | 1.40E-04 | ZP_02406882.1  | 0.00263  | YP_335297.1    | 0        |
| ZP_04899863.1  | 0        | ZP_02451459.1  | 0        | ZP_02493788.1  | 0        |
| YP_111185.1    | 0        | ZP_02485627.1  | 0        | ZP_02509869.1  | 0        |
| ZP_02459636.1  | 0        | ZP_02502034.1  | 0.00264  | ZP_03450553.1  | 0        |
| ZP_01770176.1  | 0        | ZP_04967972.1  | 0        | ZP_02415388.1  | 0.00262  |
| ABG20986.1     | 0.50374  | ZP_05886075.1  | 0.11043  | CBJ57158.1     | 0        |
| ZP_03832636.1  | 0        | YP_003016164.1 | 0        | ZP_03826219.1  | 0        |
| ABK01394.1     | 0.45414  | NP_085630.1    | 0.46249  | YP_003485577.1 | 0.49832  |
| AAX62314.1     | 0.00553  | AAX62313.1     | 0.02949  | AAX62310.1     | 0.02078  |
| AAX62305.1     | 0.05556  | AAX62311.1     | 0.01065  | ACZ54370.1     | 0.51682  |
| ADD65211.1     | 0.42454  | ADF57388.1     | 0.31287  | YP_632474.1    | 0.10781  |
| ZP_01462895.1  | 0        | tpeCAQ34918.1  | 0        | BAG68973.1     | 0.08476  |
| YP_434161.1    | 0.43629  | YP_003075555.1 | 0.52683  | ABK01386.1     | 0.34422  |
| YP_001544631.1 | 0.56316  | YP_388100.1    | 0.44868  | ZP_03310384.1  | 0.46217  |
| ADD65294.1     | 0.62267  | NP_519931.1    | 0.30079  | YP_532899.1    | 0.32194  |
| YP_002152318.1 | 0        | ZP_03841858.1  | 0        | YP_275081.1    | 0.03682  |
| ZP_03398050.1  | 0.00269  | NP_792409.1    | 0.00273  | ZP_03051890.1  | 0.00275  |
| YP_003229840.1 | 1.40E-04 | YP_002403254.1 | 0.00275  | CAX65492.1     | 0.00275  |
| ZP_06016652.1  | 0.00282  | NP_993006.1    | 0.00275  | BAI55371.1     | 0        |
| NP_669707.1    | 0        | YP_002412992.1 | 0        | CAA73127.1     | 0        |
| YP_002407087.1 | 0        | YP_002398189.1 | 0        | CAJ87591.1     | 0        |
| YP_001006816.1 | 0        | YP_669844.1    | 0        | YP_001872138.1 | 0        |
| CBG35040.1     | 0        | ZP_04003393.1  | 0        | ZP_04536450.1  | 0        |
| ZP_03002039.1  | 0        | YP_002920249.1 | 0        | YP_070123.1    | 0        |
| NP_754319.1    | 0        | YP_001452495.1 | 0.00273  | YP_541186.1    | 0        |
| ADE90838.1     | 0        | YP_002391749.1 | 0        | ZP_05436225.1  | 0        |
| YP_853076.1    | 0.00276  | YP_997199.1    | 0.14836  | YP_002257756.1 | 0.01364  |

KS3 Group 3F

|                |          |                |          |                |          |
|----------------|----------|----------------|----------|----------------|----------|
| YP_002255089.1 | 1.40E-04 | ZP_02467786.1  | 0.01354  | ZP_02360283.1  | 0.00303  |
| NP_929573.1    | 0.04719  | YP_003041139.1 | 0.0204   | CAJ76918.1     | 0.05107  |
| ZP_05887133.1  | 0.04042  | YP_129880.1    | 0.10499  | ZP_06041432.1  | 0.10034  |
| ZP_04915941.1  | 1.40E-04 | ZP_04416158.1  | 0.00271  | YP_003529804.1 | 0.63306  |
| ABP57746.1     | 0.02975  | ZP_05587364.1  | 0        | ZP_02388624.1  | 0        |
| YP_442887.1    | 1.40E-04 | ZP_02467803.1  | 0.03024  | ACZ54312.1     | 0.51118  |
| YP_002479914.1 | 0.5267   | NP_754360.1    | 0        | YP_669878.1    | 0        |
| YP_003468582.1 | 0.10565  | YP_434619.1    | 0.03357  | ZP_02327561.1  | 0.35798  |
| ZP_04261626.1  | 0.00333  | YP_001644643.1 | 0.00282  | ZP_04105325.1  | 1.50E-04 |
| ZP_04319872.1  | 0.0055   | ZP_04204195.1  | 0        | ZP_04072881.1  | 0        |
| AAR87760.2     | 0        | ZP_04085225.1  | 0.00275  | ZP_04309324.1  | 0        |
| ZP_03234200.1  | 0        | ZP_02327689.1  | 0.35652  | ZP_03054644.1  | 0.00269  |
| YP_001485891.1 | 1.40E-04 | ACH88380.1     | 0.00485  | ACH88382.1     | 0.01362  |
| ACH88379.1     | 0.00459  | ACH88381.1     | 0.00464  | NP_754362.1    | 0        |
| YP_001452445.1 | 0        | ZP_04534878.1  | 0        | ZP_03031844.1  | 0        |
| YP_541221.1    | 0        | YP_669879.1    | 0        | ZP_04003355.1  | 0.00272  |
| YP_003073750.1 | 0.54424  | YP_003468578.1 | 0.09384  | YP_434615.1    | 0.04193  |
| ZP_02327562.1  | 0.36471  | ZP_02327690.1  | 0.45672  | ZP_03054477.1  | 0.00256  |
| YP_001485889.1 | 1.60E-04 | ZP_01946777.1  | 0        | YP_001424220.1 | 0        |
| ZP_02219130.1  | 0        | NP_819808.1    | 0        | YP_001596910.1 | 0        |
| YP_002303687.1 | 0.00265  | ZP_06187070.1  | 0.17539  | YP_127441.1    | 0.02952  |
| YP_003619461.1 | 1.40E-04 | YP_001250924.1 | 0.01084  | YP_001157874.1 | 0.92998  |
| YP_095955.1    | 1.50E-04 | YP_003619246.1 | 0        | YP_001250709.1 | 0        |
| YP_127246.1    | 0.01598  | YP_124234.1    | 0.00745  | ZP_01892962.1  | 0.27844  |
| ZP_01618157.1  | 0.19458  | AAO39789.1     | 0.33634  | CAO82988.1     | 0.01151  |
| CAO82983.1     | 0.02942  | ACB47224.1     | 0.44706  | AAX44128.1     | 0.03403  |
| YP_001869791.1 | 0.032    | YP_325326.1    | 0.10495  | YP_002945068.1 | 0.20586  |
| YP_003643776.1 | 0.0078   | CAZ89054.1     | 0.011    | AAO39785.1     | 0.12988  |
| YP_003391647.1 | 0.18225  | CAO82990.1     | 0.21852  | YP_003092301.1 | 0.23994  |
| ZP_01882501.1  | 0.24081  | ACR55655.1     | 0.17252  | AAX51693.1     | 0.23834  |
| ZP_02183268.1  | 0.17598  | ACR55654.1     | 1.50E-04 | ACR55653.1     | 0.00449  |
| BAG69009.1     | 0.12643  | YP_632181.1    | 1.60E-04 | BAG68963.1     | 1.40E-04 |
| BAG68972.1     | 0.03006  | BAG68996.1     | 0.04853  | YP_631822.1    | 1.60E-04 |
| BAG68962.1     | 1.40E-04 | BAG68971.1     | 0.08904  | BAG68960.1     | 1.40E-04 |
| YP_631961.1    | 1.40E-04 | YP_002988663.1 | 0.52495  | YP_434159.1    | 0.3843   |
| ABK01391.1     | 0.44324  | ZP_01728759.1  | 0.08659  | YP_002373165.1 | 0.00448  |
| YP_003138774.1 | 0.00121  | YP_001520881.1 | 0.17654  | AAW55348.1     | 0.00461  |
| AAW55349.1     | 1.40E-04 | YP_632586.1    | 0.4056   | ZP_03127696.1  | 0.33003  |
| CAG25975.1     | 0.08363  | ABG20982.1     | 0.08325  | ADE08295.1     | 0.17297  |
| ABG20993.1     | 0.18148  | ADF57394.1     | 0.0081   | ADF57395.1     | 0.00912  |
| ADF57386.1     | 0.00456  | ZP_05375996.1  | 0.31281  | ZP_03629653.1  | 0.20536  |
| ZP_03626698.1  | 0.09878  | CAM17817.1     | 0.45045  | ABG20981.1     | 0.32736  |
| ZP_03626294.1  | 0.16144  | CAM17820.1     | 0.24443  | YP_001831985.1 | 0.24446  |

KS3 Group 3F

|                |          |                |          |                |          |
|----------------|----------|----------------|----------|----------------|----------|
| YP_001857900.1 | 0.3187   | YP_675129.1    | 0.27436  | ZP_06360031.1  | 0.04156  |
| YP_001992735.1 | 0.00517  | NP_948678.1    | 1.60E-04 | YP_002361578.1 | 0.25753  |
| ACH88363.1     | 1.40E-04 | ACH88374.1     | 1.60E-04 | ACH88371.1     | 0.00474  |
| ACH88373.1     | 0.01419  | ACH88376.1     | 0.01437  | ACH88375.1     | 0.00472  |
| ACH88372.1     | 1.40E-04 | ACH88377.1     | 0.00462  | ABD17657.1     | 0.3955   |
| YP_001415918.1 | 0.31891  | CAM34279.1     | 0.43004  | ADF57389.1     | 1.40E-04 |
| ADF57400.1     | 0.00468  | BAG69068.1     | 0.59004  | AAW84207.1     | 0.33281  |
| CAQ18832.1     | 0.2741   | ADF36683.1     | 0.44853  | AAF26920.1     | 1.50E-04 |
| ADB12490.1     | 1.40E-04 | ACB46194.1     | 0.02503  | AAF62882.1     | 0        |
| ABB92692.1     | 0        | AAF19812.1     | 0        | ZP_01467099.1  | 0        |
| AAW03327.1     | 0.07091  | CAD89775.1     | 0.0524   | ZP_06192961.1  | 0.51423  |
| YP_001983457.1 | 0.41669  | YP_953931.1    | 0.06016  | YP_001134654.1 | 0.06236  |
| YP_639995.1    | 0.00249  | YP_001071132.1 | 1.50E-04 | NP_302532.1    | 0.03637  |
| ZP_04748268.1  | 0.01285  | YP_001850076.1 | 1.40E-04 | YP_905925.1    | 0.00508  |
| ZP_03533484.1  | 0        | NP_217451.1    | 0        | NP_856605.1    | 0        |
| ZP_02552327.1  | 0        | ZP_05773745.1  | 0        | ZP_03426299.1  | 1.40E-04 |
| ACG63859.1     | 0        | CAQ48282.1     | 0        | AAW55352.1     | 0.00428  |
| AAW55351.1     | 0.00432  | AAW55350.1     | 1.40E-04 | ACH88378.1     | 0.24743  |
| ACH88366.1     | 0.02298  | ACH88369.1     | 1.40E-04 | ADF57383.1     | 0.29005  |
| ZP_03629367.1  | 0.18084  | YP_631015.1    | 0.23256  | YP_759908.1    | 0.37141  |
| ABG20988.1     | 0.03973  | ZP_05113660.1  | 0.26134  | YP_914644.1    | 0.24882  |
| ZP_02153408.1  | 0.17035  | ZP_00960961.1  | 0.20084  | ZP_05741641.1  | 0.03601  |
| YP_614394.1    | 0.00584  | ZP_05088646.1  | 0.05199  | ZP_02145704.1  | 1.60E-04 |
| ZP_02149682.1  | 0.00409  | AAX51696.1     | 0.01982  | AAX51694.1     | 0.00479  |
| YP_166102.1    | 0.1257   | ZP_05080683.1  | 0.0769   | ZP_01755301.1  | 0.09179  |
| AAX51698.1     | 0.03809  | ZP_01057778.1  | 0.02486  | ZP_05842534.1  | 0.1208   |
| ZP_05075614.1  | 0.15202  | AAX51695.1     | 0.0506   | ACH88368.1     | 0.0056   |
| ACH88365.1     | 0.00854  | ZP_01878022.1  | 1.40E-04 | ZP_01035521.1  | 0.03599  |
| ZP_01747999.1  | 0.09031  | ZP_05783142.1  | 0.07664  | ZP_01444322.1  | 1.50E-04 |
| ACR55658.1     | 1.40E-04 | ACR55657.1     | 1.60E-04 | ZP_01740677.1  | 0.11066  |
| AAX51697.1     | 0.07267  | BAG69099.1     | 0.23498  | ABG20989.1     | 0.22505  |
| YP_631808.1    | 0.30397  | ZP_01466419.1  | 0.20031  | BAG69047.1     | 0.17285  |
| YP_631817.1    | 0.1681   | CAF05651.1     | 0.12082  | ADH04682.1     | 0.08317  |
| YP_631806.1    | 0.13948  | BAG68988.1     | 0.0169   | BAG68975.1     | 0.01683  |
| YP_001546722.1 | 0.39372  | ACC99581.1     | 0.38219  | YP_003102583.1 | 0.21953  |
| NP_822020.1    | 0.13616  | CAQ18839.1     | 0.25395  | ABG20984.1     | 0.26565  |
| ACY71536.1     | 0.17266  | ACY71561.1     | 0.0161   | ACY71546.1     | 0.00484  |
| BAG69044.1     | 0.00485  | BAG69062.1     | 0.00477  | ABD17655.1     | 1.40E-04 |
| ACY71566.1     | 0.00484  | ABD17652.1     | 0.01344  | ABD17654.1     | 0.02269  |
| ABD17653.1     | 0.0047   | YP_003656372.1 | 0.42841  | BAG68989.1     | 0.47989  |
| ZP_03310383.1  | 0.42096  | BAG69129.1     | 0.27347  | ADF57392.1     | 0.34686  |
| YP_001866557.1 | 0.32731  | ACJ46059.3     | 0.05012  | ZP_06307806.1  | 0        |
| ADF88279.1     | 0        | ADF88265.1     | 0        | ADF88262.1     | 0        |

KS3 Group 3F

|                |          |                |          |                |          |
|----------------|----------|----------------|----------|----------------|----------|
| AAM33468.1     | 0.01026  | ABM21569.1     | 0.2799   | AAO62585.1     | 0.0424   |
| AAO64404.1     | 1.60E-04 | ZP_01629644.1  | 0.00782  | CAD29795.1     | 0.01045  |
| CAQ48243.1     | 1.00E-04 | YP_001658877.1 | 0.00522  | BAB12213.1     | 0.01575  |
| AAX73195.1     | 0.00261  | AAF00957.1     | 0        | CAO90231.1     | 0        |
| AAN32979.1     | 0.20362  | AAX44133.1     | 0.00395  | AAX44134.1     | 1.40E-04 |
| ZP_05037424.1  | 0.1841   | AAW55353.1     | 0.25083  | AAW84170.1     | 0.3043   |
| YP_001804494.1 | 0.03627  | ZP_00514742.1  | 0.06978  | NP_486675.1    | 0.09142  |
| ZP_01628055.1  | 0.06369  | YP_002505320.1 | 0.31178  | ACC99576.1     | 0.2467   |
| YP_001804488.1 | 0.03583  | ZP_00514736.1  | 0.06243  | AAX44136.1     | 0.17232  |
| AAW84221.1     | 0.1643   | AAX44106.1     | 1.50E-04 | AAW55355.1     | 0.00911  |
| AAW55356.1     | 1.40E-04 | NP_486686.1    | 0.06609  | ZP_01628043.1  | 0.03328  |
| AAW55358.1     | 0.00458  | AAW55357.1     | 0.00939  | AAX44139.1     | 1.40E-04 |
| AAX44140.1     | 0.00449  | ACC99578.1     | 0.41149  | CAO82991.1     | 0.28789  |
| ZP_05494799.1  | 0.02397  | YP_002506646.1 | 0.01414  | AAW55362.1     | 0.1883   |
| AAW55361.1     | 0.00454  | AAW55359.1     | 0.00457  | AAW55360.1     | 1.40E-04 |
| YP_001520883.1 | 0.29705  | AAS98784.1     | 0.20635  | YP_723338.1    | 0.22884  |
| AAT70102.1     | 0.21778  | ADA69241.1     | 0.13126  | YP_322130.1    | 0.07113  |
| AAF15892.2     | 0.0187   | YP_001865726.1 | 0.01406  | YP_001866469.1 | 0.25964  |
| AAS98787.1     | 0.19522  | ZP_01998719.1  | 0.30507  | ZP_03631566.1  | 0.31858  |
| CAO82979.1     | 0.00435  | CAO82976.1     | 0.00922  | ZP_05494800.1  | 0.05454  |
| YP_002506647.1 | 0.0414   | YP_001866784.1 | 0.1608   | AAN28672.1     | 0.2742   |
| ADF57385.1     | 0.32031  | ADF36707.1     | 0.16419  | ADF36705.1     | 0.00659  |
| ADF36709.1     | 1.60E-04 | ADF36706.1     | 0.00352  | ADF36704.1     | 0.00868  |
| YP_001866786.1 | 0.25501  | YP_001866780.1 | 0.1405   | YP_001869920.1 | 0.31002  |
| AAX44113.1     | 0.00454  | AAX44112.1     | 0.00454  | AAX44117.1     | 0.00454  |
| AAX44111.1     | 1.40E-04 | AAX44119.1     | 0.00452  | AAX44114.1     | 1.40E-04 |
| YP_001866797.1 | 0.23408  | YP_001866779.1 | 0.25159  | AAW55354.1     | 0.24589  |
| ACJ46057.1     | 0.18316  | YP_001818849.1 | 0.2183   | YP_001818852.1 | 0.27514  |
| YP_481081.1    | 0.2012   | ABS90478.1     | 0.16953  | ABK60044.1     | 0.20017  |
| ADI12780.1     | 0.21237  | YP_001545184.1 | 0.3114   | BAG68979.1     | 0.35683  |
| BAG68995.1     | 0.07876  | YP_631807.1    | 1.40E-04 | BAG68964.1     | 0.00476  |
| ZP_01466416.1  | 0.19031  | YP_631818.1    | 0.1225   | AAW84203.1     | 0.46727  |
| ZP_00944388.1  | 0        | YP_002258020.1 | 0        | YP_001452454.1 | 0        |
| NP_754352.1    | 0        | ZP_03031592.1  | 0        | ZP_05003233.1  | 0        |
| ZP_06776184.1  | 0        | YP_002907571.1 | 0.33446  | ABD17656.1     | 0.06694  |
| BAG69042.1     | 0.06212  | YP_001618911.1 | 0.0728   | ACY71557.1     | 0.06167  |
| YP_003117665.1 | 0.56967  | BAG69063.1     | 0.02486  | ABD17658.1     | 0.01147  |
| ABD17659.1     | 0.0158   | ZP_01467455.1  | 0.32051  | YP_442884.1    | 0        |
| ZP_02388620.1  | 0        | ZP_01459583.1  | 0.03175  | BAG69028.1     | 0.04704  |
| ADH04680.1     | 0.12109  | CAF05649.1     | 0.08352  | ABG20978.1     | 0.38028  |
| ZP_06220289.1  | 1.60E-04 | ZP_06396937.1  | 0.00264  | YP_003338144.1 | 0.13264  |
| ZP_04609112.1  | 0.04914  | ZP_06219517.1  | 1.50E-04 | ZP_06399928.1  | 0.00273  |
| YP_001610982.1 | 0.20564  | YP_001617472.1 | 0.0387   | ACY71538.1     | 0.05154  |



KS3 Group 3F

|                |          |                |          |                |          |
|----------------|----------|----------------|----------|----------------|----------|
| ZP_05803519.1  | 0.35053  | ADI05329.1     | 0.27087  | ADD65220.1     | 0.57848  |
| BAG69093.1     | 0.30406  | ABG20995.1     | 0.37959  | ABY71212.1     | 0.00679  |
| ABG57048.1     | 0.00735  | ZP_06890383.1  | 0.23613  | YP_412520.1    | 0.20567  |
| YP_001565769.1 | 0.18614  | YP_002945627.1 | 0.09462  | YP_972053.1    | 0.00362  |
| ZP_06212545.1  | 0.00731  | YP_002539682.1 | 0.15459  | NP_356936.2    | 0.17739  |
| YP_002539689.1 | 0.26105  | ZP_06500227.1  | 0.00815  | YP_234791.1    | 1.40E-04 |
| CAD70195.1     | 0.00266  | NP_929148.1    | 0.02206  | YP_003041510.1 | 0.01911  |
| CAL80821.1     | 0.13851  | ZP_02365874.1  | 0        | ZP_02358834.1  | 0        |
| ZP_03449976.1  | 0        | YP_105690.1    | 0        | YP_001024122.1 | 0        |
| ZP_04522578.1  | 0        | ZP_03793567.1  | 0        | ZP_01770412.1  | 0        |
| ZP_02407036.1  | 0        | YP_335431.1    | 0        | YP_001075743.1 | 0        |
| ZP_02415539.1  | 0        | YP_001062790.1 | 0        | ZP_02493943.1  | 0        |
| ZP_02475287.1  | 0        | YP_111276.1    | 0        | ZP_02510019.1  | 0        |
| ZP_02459802.1  | 1.40E-04 | ZP_02485782.1  | 1.40E-04 | ZP_02451631.1  | 0.00221  |
| ABB80392.1     | 0.53197  | ACG60781.1     | 0.30367  | AAG02357.1     | 0.21333  |
| YP_003101412.1 | 0.24979  | ABL74938.1     | 0.08059  | YP_002908898.1 | 0.46224  |
| ZP_06711711.1  | 0.11784  | BAI44051.1     | 0.13935  | ACZ54326.1     | 0.47185  |
| YP_003509005.1 | 0.80993  | YP_003512800.1 | 0.40212  | YP_001702991.1 | 0.04482  |
| YP_003659707.1 | 0.12944  | ABK01393.1     | 0.47765  | ADI09565.1     | 0.42224  |
| ZP_04700364.1  | 0.07362  | CAJ89362.1     | 0.04466  | ZP_05543395.1  | 0.02472  |
| YP_001702992.1 | 0.10399  | YP_003659708.1 | 0.09709  | ZP_06396934.1  | 0.00562  |
| ZP_06220286.1  | 1.50E-04 | YP_003338150.1 | 0.18067  | ZP_06399924.1  | 1.60E-04 |
| ZP_06219513.1  | 0.00261  | YP_440276.1    | 0        | ZP_05589167.1  | 0        |
| ZP_02385622.1  | 0        | ZP_02371767.1  | 0.00245  | ZP_02405592.1  | 0        |
| YP_106049.1    | 0        | YP_001025961.1 | 0        | YP_001074483.1 | 0        |
| [YP_110331.1   | 0        | ZP_03790157.1  | 0        | ZP_02458375.1  | 0        |
| ZP_02414120.1  | 0        | ZP_02450202.1  | 0        | ZP_02500743.1  | 0        |
| ZP_02508684.1  | 0        | ZP_00442116.2  | 0        | YP_337019.1    | 0        |
| ZP_04520398.1  | 0        | ZP_04955541.1  | 0        | ZP_02484375.1  | 0        |
| ZP_02473932.1  | 0        | ZP_03454554.1  | 0        | ZP_02492559.1  | 0        |
| YP_001061543.1 | 0.00247  | ZP_02365045.1  | 0.00261  | ZP_02357884.1  | 1.40E-04 |
| ZP_06587882.1  | 0        | ZP_04696972.1  | 0        | ZP_02467525.1  | 0.37859  |
| AAO39784.1     | 0.19104  | ADI09567.1     | 0.57807  | YP_002908630.1 | 0.53462  |
| YP_607783.1    | 0.41471  | AAM12934.1     | 0.62709  | YP_003452767.1 | 0.22101  |
| ZP_00052686.2  | 0.03815  | YP_421312.1    | 0.01623  | ZP_04750189.1  | 0.526    |
| ZP_04711070.1  | 1.40E-04 | ZP_04695887.1  | 1.40E-04 | YP_001823996.1 | 1.40E-04 |
| ZP_06282380.1  | 1.50E-04 | ZP_05529014.1  | 0.12308  | ZP_04697873.1  | 0.20239  |
| YP_003380450.1 | 0.35705  | ZP_05529824.1  | 0.38328  | YP_003384136.1 | 0.2018   |
| ADI04081.1     | 0.06954  | ZP_04700358.1  | 0.20352  | ZP_05531065.1  | 0.06123  |
| ZP_02415191.1  | 0        | ZP_02451264.1  | 0        | ZP_02501785.1  | 0        |
| ZP_02509680.1  | 0        | ZP_02485431.1  | 0        | ZP_02459437.1  | 0        |
| ZP_02474934.1  | 0        | ZP_02493569.1  | 0        | ZP_02406692.1  | 0        |
| CBA18136.1     | 0.36926  | ZP_02371233.1  | 1.40E-04 | ZP_02385129.1  | 0.00519  |

KS3 Group 3F

|                |          |                |          |                |          |
|----------------|----------|----------------|----------|----------------|----------|
| ZP_02468612.1  | 0.39405  | YP_003529803.1 | 0.77067  | ZP_02468615.1  | 0.36355  |
| NP_940470.1    | 0.79977  | YP_001536929.1 | 0.03275  | YP_001159476.1 | 1.50E-04 |
| ACZ54282.1     | 0.57221  | ADI09173.1     | 0.65484  | YP_003658640.1 | 0.72796  |
| ZP_06913871.1  | 0.47809  | ZP_05520928.1  | 0.89937  | ZP_01077683.1  | 0.54299  |
| CBA75678.1     | 0.47815  | ACI32872.1     | 0.00396  | ACI32873.1     | 0.01826  |
| ACI32871.1     | 0.00913  | AAX62322.1     | 0.03141  | AAX62328.1     | 0.02476  |
| AAX62320.1     | 0.01438  | AAX62317.1     | 0.04007  | AAX62350.1     | 0.01766  |
| AAX62329.1     | 0.02293  | ZP_04588001.1  | 0.0352   | YP_234879.1    | 0.02025  |
| ZP_05639079.1  | 1.40E-04 | YP_273986.1    | 0.00718  | ZP_06480862.1  | 0.00569  |
| YP_347999.1    | 0.04678  | YP_608303.1    | 0.10428  | YP_003101612.1 | 0.17139  |
| ZP_04750209.1  | 0.33531  | ADI06109.1     | 0.11929  | AAT72341.2     | 1.40E-04 |
| AAT42010.1     | 1.50E-04 | AAO39107.1     | 0.0507   | ZP_01815407.1  | 0.10095  |
| XP_002772144.1 | 0.14383  | XP_002774261.1 | 0.04791  | YP_003039292.1 | 0.26782  |
| ZP_01814279.1  | 0.34645  | YP_002911533.1 | 0.0601   | YP_439430.1    | 0.00534  |
| ZP_02370747.1  | 0.0058   | ZP_02466490.1  | 0.01171  | YP_001062644.1 | 0        |
| ZP_02406885.1  | 0        | ZP_02459638.1  | 0        | ZP_03795732.1  | 0        |
| ZP_02509870.1  | 0.00266  | ZP_02415390.1  | 1.50E-04 | ZP_02493789.1  | 0        |
| YP_335298.1    | 0        | ZP_02451461.1  | 0        | ZP_04899826.1  | 0        |
| ZP_04522679.1  | 0        | ZP_01770218.1  | 0        | YP_111186.1    | 0        |
| ZP_04967973.1  | 0        | ZP_03450028.1  | 0        | ZP_02485628.1  | 0        |
| XP_002401690.1 | 0        | ZP_04700034.1  | 0        | CAM34278.1     | 0.45103  |
| YP_003485692.1 | 0.80987  | ZP_03231753.1  | 0.67673  | ABK01395.1     | 0.44824  |
| YP_002911536.1 | 0.14728  | ZP_02370750.1  | 0.00265  | YP_439433.1    | 0        |
| ZP_05590818.1  | 0        | ZP_02384635.1  | 1.40E-04 | ZP_01770132.1  | 0.00282  |
| ZP_02466487.1  | 0.01134  | ZP_04521352.1  | 0        | ZP_04899708.1  | 0        |
| YP_335295.1    | 0        | YP_111183.1    | 0        | ZP_02415385.1  | 0        |
| ZP_02493786.1  | 0        | YP_001062641.1 | 0        | ZP_04896773.1  | 0        |
| ZP_02459631.1  | 0        | ZP_02451454.1  | 0        | ZP_04967970.1  | 0        |
| ZP_02485622.1  | 0        | YP_001075598.1 | 0        | ZP_02475131.1  | 0        |
| ZP_02502031.1  | 0        | ZP_02406878.1  | 1.60E-04 | AAO39109.1     | 0.03397  |
| ZP_01815405.1  | 0.10876  | YP_003041053.1 | 0.2774   | ZP_01898880.1  | 0.15979  |
| ZP_06185950.1  | 0.62364  | ZP_03626595.1  | 1.43707  | ZP_05493846.1  | 0.78699  |
| ZP_06775487.1  | 0        | ZP_05004800.1  | 0        | NP_928524.1    | 0.44357  |
| YP_003450670.1 | 0.59243  | YP_702174.1    | 0.03097  | YP_002779115.1 | 0.03389  |
| AAU93835.1     | 0.00589  | AAU93836.1     | 0.01006  | AAU93834.1     | 0.01322  |
| YP_003123078.1 |          | ZP_06143609.1  | 0.67611  | ZP_06720762.1  | 0.62451  |
| CAO82980.1     | 1.40E-04 | CAO82987.1     | 0.0087   | ZP_06470021.1  | 0.75584  |
| ZP_06470020.1  | 0.48949  | ZP_06470023.1  | 0.57483  | ZP_04221543.1  | 0.36043  |
| YP_001422333.1 | 0.34926  | YP_003353664.1 | 0.40106  | ZP_04087647.1  | 0.20811  |
| ZP_05493843.1  | 0.3751   | YP_002506689.1 | 0.28413  | YP_003353668.1 | 0.47214  |
| ZP_04087649.1  | 0.28196  | YP_002772676.1 | 0.45375  | ZP_01724484.1  | 1.50E-04 |
| AAX62325.1     | 0.01419  | YP_001698936.1 | 0.00222  | YP_001395738.1 | 0.22389  |
| NP_721710.1    | 0.5427   | ZP_06598569.1  | 0.48958  | YP_001395123.1 | 0        |

KS3 Group 3F

|                |          |                |          |                |         |
|----------------|----------|----------------|----------|----------------|---------|
| YP_002472072.1 | 0        | YP_002506696.1 | 0.41735  | YP_002772674.1 | 0.391   |
| ZP_05493844.1  | 0.41499  | YP_001395121.1 | 0.32402  | ZP_04162370.1  | 0.37413 |
| YP_002506690.1 | 0.25276  | YP_002506691.1 | 0.27267  | YP_002506697.1 | 0.37001 |
| YP_002505319.1 | 0.32119  | ZP_04803476.1  | 0.41209  | YP_002505318.1 | 0.34388 |
| YP_003123086.1 | 0.48054  | ZP_04805638.1  | 0.6395   | ZP_04087646.1  | 0.23535 |
| YP_003353663.1 | 0.57946  | YP_001307397.1 | 0.4612   | YP_002506698.1 | 0.39903 |
| ABK01379.1     | 0.57209  | YP_002772738.1 | 0.24966  | ZP_02328324.1  | 0.14774 |
| ZP_06873002.1  | 1.40E-04 | spQ9R9J1.1     | 0.00273  | ACI22671.1     | 0.00273 |
| AAQ07410.1     | 0.01372  | BAB69698.1     | 1.50E-04 | AAN07012.1     | 0.00273 |
| ABY89498.1     | 0        | YP_001421412.1 | 0        | ZP_01386297.1  | 0.93901 |
| ZP_01132576.1  | 1.11442  | CAH55638.1     | 0.16463  | CAH55655.1     | 0.16276 |
| XP_001934718.1 | 3.70791  | AAM78457.1     | 2.90289  | ZP_05495050.1  | 3.25348 |
| XP_001227513.1 | 2.29908  | YP_003138779.1 | 1.00841  | ZP_05519955.1  | 1.108   |
| ZP_06913881.1  | 1.65867  | XP_001944758.1 | 4.3266   | XP_361344.2    | 4.14778 |
| YP_001232332.1 | 3.79362  | YP_002911513.1 | 0.77313  | YP_001185900.1 | 0.87885 |
| ZP_01626767.1  | 0.41171  | ZP_05095199.1  | 0.18945  | ZP_05126698.1  | 0.04981 |
| ZP_01102617.1  | 0.05048  | YP_001981921.1 | 0.20902  | YP_002797779.1 | 0.08118 |
| ZP_01368193.1  | 0        | YP_793645.1    | 0        | ZP_04937267.1  | 0       |
| NP_253861.1    | 0        | YP_002443144.1 | 0        | ZP_06881505.1  | 0       |
| YP_001351231.1 | 1.40E-04 | ZP_01223374.1  | 0.33472  | ZP_06191937.1  | 0.01939 |
| YP_003611123.1 | 0.07485  | ZP_01625089.1  | 0.36971  | ZP_01616254.1  | 0.3501  |
| ZP_01165036.1  | 0.16707  | ZP_01075436.1  | 0.12411  | YP_001342335.1 | 0.10718 |
| YP_574978.1    | 0.32623  | YP_003469774.1 | 0.38251  | ZP_01114895.1  | 0.11833 |
| ZP_01900699.1  | 0.10348  | YP_132684.1    | 0.00437  | ZP_01222197.1  | 0.01108 |
| ZP_06157389.1  | 0.08112  | ZP_01159471.1  | 0.02807  | ZP_01233271.1  | 0.00505 |
| YP_527077.1    | 0.41336  | ACH72901.1     | 0.15517  | XP_681084.1    | 0.03178 |
| AAC49198.1     | 0.05154  | ZP_06829497.1  | 0.30476  | YP_002778327.1 | 0.10793 |
| CAA46024.1     | 0        | ZP_06837277.1  | 0        | ZP_03394081.1  | 0.41892 |
| ZP_04835907.1  | 0.18946  | NP_940183.1    | 0.11091  | YP_701403.1    | 0.10143 |
| ZP_04387794.1  | 0.12868  | YP_002767320.1 | 0.1069   | ZP_06604979.1  | 0.13686 |
| YP_117466.1    | 0.26604  | YP_003646283.1 | 0.51453  | YP_003273140.1 | 0.2159  |
| YP_640811.1    | 0.00617  | YP_001071929.1 | 0.01576  | YP_001702252.1 | 0.13879 |
| ZP_05228143.1  | 0.09941  | YP_889015.1    | 0.00816  | AAO43178.1     | 0.04654 |
| YP_001133797.1 | 0.19851  | YP_954908.1    | 0.05751  | YP_907384.1    | 0       |
| YP_001852225.1 | 0        | NP_301868.1    | 0.03682  | ZP_06433799.1  | 0       |
| NP_856198.1    | 0        | ZP_06518033.1  | 0        | ZP_05765008.1  | 0       |
| ZP_03425830.1  | 1.40E-04 | ZP_06522069.1  | 0.05426  | NP_337093.1    | 0.12418 |
| NP_217040.1    | 0.00414  | ZP_04749666.1  | 0.01429  | ZP_06851996.1  | 0.07944 |
| NP_961266.1    | 0        | YP_880884.1    | 0        | ZP_05215994.1  | 0.00325 |
| YP_002835610.1 | 0.26418  | ZP_03710807.1  | 0.22244  | NP_601696.1    | 0.03823 |
| BAB99888.1     | 0.03898  | ZP_03934033.1  | 0.30263  | YP_001139316.1 | 0.00751 |
| ZP_05750911.1  | 0.00718  | NP_739002.1    | 0.18492  | ZP_04837185.1  | 0       |
| ZP_03709883.1  | 0        | ZP_02044858.1  | 0.14658  | ZP_06608499.1  | 0.05549 |

KS3 Group 3F

|                |          |                |          |                |          |
|----------------|----------|----------------|----------|----------------|----------|
| ZP_06043461.1  | 0        | YP_002833817.1 | 0        | ZP_03935133.1  | 0.01734  |
| ZP_06837028.1  | 1.40E-04 | CAA61087.1     | 0.21051  | NP_737523.1    | 0.03094  |
| YP_225128.1    | 1.40E-04 | YP_001137826.1 | 0.00528  | NP_600065.1    | 1.50E-04 |
| YP_003659808.1 | 0.42194  | ZP_03926457.1  | 0.1764   | ZP_06751771.1  | 0.12604  |
| ZP_03742148.1  | 1.60E-04 | ZP_03324816.1  | 0.01544  | YP_003359863.1 | 0.03552  |
| NP_696693.1    | 0        | YP_002323720.1 | 0        | ZP_06596502.1  | 0        |
| ZP_04663991.1  | 0        | ZP_03976473.1  | 0        | YP_003662064.1 | 0        |
| ZP_03646962.1  | 0.03463  | ZP_00121397.1  | 0.03147  | ZP_03936961.1  | 0.07916  |
| ZP_04448562.1  | 1.50E-04 | YP_909119.1    | 1.50E-04 | ZP_02028077.1  | 0.00517  |
| ZP_02917151.1  | 0.00291  | ADC85342.1     | 0        | ZP_02963252.1  | 0        |
| ZP_05966223.1  | 0.05254  | ZP_03918327.1  | 0        | ZP_03972703.1  | 0        |
| ZP_06755645.1  | 0.31332  | YP_003374392.1 | 0.05739  | ZP_06927266.1  | 0.0728   |
| ZP_06162645.1  | 0.42275  | ZP_05312484.1  | 1.35629  | ZP_03391714.1  | 0.17083  |
| YP_003141425.1 | 0.2367   | ZP_02181571.1  | 0.51793  | YP_001297183.1 | 0.53021  |
| ZP_01254925.1  | 0.84152  | YP_003194614.1 | 0.59069  | YP_863570.1    | 0.66006  |
| ZP_00950030.1  | 0.4257   | YP_003586997.1 | 0.67993  | ZP_04057035.1  | 0.68486  |
| NP_824837.1    | 0.91557  | ZP_05511357.1  | 0.54596  | YP_001159612.1 | 0.98745  |
| ZP_05541599.1  | 0.69104  | ZP_04685001.1  | 0.34497  | NP_824841.1    | 0.37942  |
| ZP_05517492.1  | 0.29469  | YP_925302.1    | 0.88567  | ZP_04215337.1  | 0        |
| YP_003667781.1 | 0        | BAF92595.1     | 0.97426  | YP_002505220.1 | 1.52221  |
| AAF81234.1     | 0.59445  | YP_798517.1    | 0.11492  | YP_002251.1    | 0.0169   |
| NP_711611.2    | 0.04608  | ZP_06418837.1  | 0.20038  | ZP_05917376.1  | 0.01966  |
| ZP_06422635.1  | 0.04316  | ZP_06256105.1  | 0.13317  | ZP_00949731.1  | 0.27886  |
| YP_003121552.1 | 0.27589  | YP_003086385.1 | 0.32006  | YP_003140964.1 | 0.03376  |
| ZP_03391218.1  | 0.00778  | ZP_04057463.1  | 0.1303   | ZP_03850781.1  | 0.25158  |
| YP_001193458.1 | 0.23791  | YP_001297141.1 | 0.17429  | ZP_03207264.1  | 0.17501  |
| ZP_03676276.1  | 0.22068  | ZP_04541977.1  | 0        | ZP_04556528.1  | 0        |
| ZP_03300359.1  | 0.00574  | ZP_05253899.1  | 0.00583  | YP_001298327.1 | 0        |
| ZP_06743059.1  | 0        | ZP_02064226.1  | 0.00841  | ZP_05758301.1  | 0.00482  |
| ZP_06618708.1  | 1.40E-04 | ZP_04549661.1  | 0.0038   | ZP_03016928.1  | 0.10286  |
| ZP_03678625.1  | 0.15539  |                |          |                |          |

KS3 Group 3G

| Sequence       | Distance | Sequence       | Distance | Sequence       | Distance |
|----------------|----------|----------------|----------|----------------|----------|
| ADH85834.1     | 0.14998  | ZP_01289642.1  | 0.18061  | ZP_06369006.1  | 0.61844  |
| YP_002990146.1 | 0.44035  | ZP_03738402.1  | 0.25819  | ZP_01312285.1  | 0.32054  |
| YP_358072.1    | 0.44415  | ZP_05311649.1  | 0.4012   | ZP_05111701.1  | 0.80827  |
| ZP_03724762.1  | 0.32419  | ZP_05059654.1  | 0.62712  | ZP_06209941.1  | 0.39243  |
| ZP_03569674.1  | 0.02479  | ZP_03588216.1  | 0.032    | ZP_02909369.1  | 0.00479  |
| YP_775500.1    | 0.00321  | YP_001810768.1 | 0.10131  | YP_001115148.1 | 0.1307   |
| ZP_02379839.1  | 0.11253  | NP_521918.1    | 0.10953  | YP_001893286.1 | 0.2411   |
| ZP_06464972.1  | 0.08517  | ZP_06293523.1  | 0.08723  | ZP_02884832.1  | 0.01251  |
| ZP_03270487.1  | 0.10911  | YP_001896666.1 | 0.05494  | ZP_06842831.1  | 0.11746  |
| YP_560057.1    | 0.02927  | YP_003605835.1 | 0.42239  | YP_001856939.1 | 0.11916  |
| YP_003075450.1 | 0.50175  | ZP_01305636.1  | 0.63534  | AAR05308.1     | 0.15811  |
| AAS73114.1     | 0.1653   | ZP_05826354.1  | 0.03157  | ZP_04662423.1  | 0.00795  |
| ZP_06786976.1  | 0        | YP_001083175.1 | 0        | YP_001844768.1 | 0.00601  |
| ZP_06691341.1  | 0.0546   | ZP_03821678.1  | 0.04768  | ZP_06066528.1  | 0.01733  |
| ZP_05359830.1  | 0.04673  | ZP_05826267.1  | 0.00196  | YP_001083897.1 | 0.00611  |
| YP_001707797.1 | 1.50E-04 | YP_045600.1    | 0.12914  | ZP_06068924.1  | 0.01528  |
| ZP_06062471.1  | 0.01113  | ZP_06057833.1  | 0.00699  | EEZ80028.1     | 0.12363  |
| AAR38142.1     | 0.16084  | YP_001219728.1 | 0.09154  | YP_904181.1    | 0.14397  |
| ACX30628.1     | 0.10697  | YP_115272.1    | 0.19567  | ZP_01127508.1  | 0.3906   |
| YP_001209235.1 | 0.29919  | ZP_05706248.1  | 0.19585  | ZP_04600655.1  | 0.04389  |
| ZP_06734642.1  | 0.01591  | ZP_03714506.1  | 0.02788  | YP_546001.1    | 0.12589  |
| YP_003050647.1 | 0.16613  | ADI29479.1     | 0.10109  | YP_003048970.1 | 0.16339  |
| ZP_01552028.1  | 0.25721  | ZP_05081371.1  | 0.15427  | YP_003528179.1 | 0.04286  |
| ZP_05047759.1  | 0.03418  | YP_343779.1    | 0.00793  | ZP_01999041.1  | 0.16003  |
| YP_003262866.1 | 0.31567  | YP_003551900.1 | 0.2908   | ZP_02190711.1  | 0.12725  |
| ZP_06055545.1  | 0.25255  | ZP_01264438.1  | 0        | YP_265820.1    | 0        |
| ZP_05069324.1  | 0.03946  | ZP_01256162.1  | 0.00546  | ZP_01016621.1  | 0.52602  |
| YP_002542845.1 | 0.07546  | NP_353185.2    | 0.03975  | YP_001329102.1 | 0.02603  |
| YP_002828052.1 | 0.02957  | NP_384353.1    | 0.01456  | YP_001976318.1 | 0.00641  |
| YP_467660.1    | 0.01796  | YP_002283545.1 | 1.60E-04 | YP_765721.1    | 0        |
| YP_002978157.1 | 0        | ZP_02164847.1  | 0.07844  | YP_003064874.1 | 0.29759  |
| YP_002548113.1 | 0.08939  | YP_676470.1    | 0.06887  | ZP_05810216.1  | 0.02441  |
| NP_106207.1    | 0.0124   | ZP_06348918.1  | 0.23005  | YP_001414890.1 | 0.22888  |
| YP_003595197.1 | 0.02996  | NP_422513.1    | 0.01295  | YP_001686679.1 | 0.09047  |
| ZP_04768846.1  | 0.21318  | YP_002128871.1 | 0.14656  | ZP_05033949.1  | 0.08778  |
| ZP_06170564.1  | 0.12861  | ZP_00957260.1  | 0.21786  | YP_003061421.1 | 0.3433   |
| YP_758278.1    | 0.16093  | ZP_05377761.1  | 0.23065  | YP_002362501.1 | 0.27436  |
| YP_001831475.1 | 0.07367  | YP_001769123.1 | 0.02885  | YP_002495728.1 | 0.02408  |
| YP_001923208.1 | 0.02664  | YP_001637918.1 | 0.00804  | YP_002419322.1 | 0.00404  |
| YP_002961569.1 | 1.40E-04 | YP_001755351.1 | 0.0701   | YP_001202284.1 | 0.10258  |
| YP_779195.1    | 0.10053  | YP_001236276.1 | 0.05009  | YP_530242.1    | 0.07606  |
| NP_945779.1    | 0.00597  | YP_001989466.1 | 1.60E-04 | ZP_06360426.1  | 0.00599  |

KS3 Group 3G

|                |          |                |          |                |          |
|----------------|----------|----------------|----------|----------------|----------|
| YP_484234.1    | 0.02488  | YP_567362.1    | 0.00597  | YP_001369291.1 | 0.0179   |
| ZP_04681550.1  | 0.00244  | NP_540874.1    | 0        | ZP_05448654.1  | 0        |
| pdb3LRFA       | 0        | YP_222801.1    | 0        | NP_699146.1    | 0        |
| ZP_05450313.1  | 0        | ZP_05180021.1  | 1.60E-04 | YP_032987.1    | 0.05223  |
| YP_031840.1    | 0.02674  | YP_002971187.1 | 0.02364  | YP_989518.1    | 0.04279  |
| YP_001608624.1 | 0.0357   | NP_767410.1    | 0.04996  | YP_316653.1    | 0.01832  |
| YP_575402.1    | 0.02025  | ZP_01045155.1  | 0.00479  | YP_001414969.1 | 0.09786  |
| YP_002287508.1 | 0.03544  | ZP_06890349.1  | 0.0568   | ZP_01228420.1  | 0.2277   |
| ZP_05085736.1  | 0.19609  | YP_001527559.1 | 0.13994  | ZP_06866270.1  | 0.11635  |
| ZP_05115615.1  | 0.14741  | ZP_01902655.1  | 0.04839  | ZP_00958316.1  | 0.04969  |
| ZP_01746730.1  | 0.03658  | ZP_05781073.1  | 0.07388  | ZP_01445555.1  | 0.04513  |
| ZP_01157613.1  | 0.11302  | ZP_01750750.1  | 0.05071  | ZP_01002575.1  | 0.04841  |
| ZP_05050360.1  | 0.00176  | ZP_05063430.1  | 0.02883  | ZP_01039829.1  | 0.01668  |
| YP_458237.1    | 0.08584  | ZP_01862967.1  | 0.01442  | ZP_05076693.1  | 0.04896  |
| ZP_05340648.1  | 0.05816  | ZP_01015873.1  | 0.06899  | YP_509598.1    | 0.08281  |
| ZP_01000969.1  | 0.06816  | YP_684067.1    | 0.03135  | ZP_02141995.1  | 0.02876  |
| ZP_02154887.1  | 0.01757  | ZP_05100864.1  | 0.03581  | ZP_00948270.1  | 0.00591  |
| ZP_00953725.1  | 1.40E-04 | ZP_05077780.1  | 0.03173  | ZP_01752673.1  | 0.01238  |
| YP_612176.1    | 0.01245  | ZP_05089308.1  | 1.50E-04 | ZP_02149114.1  | 0.00622  |
| ZP_02146448.1  | 1.40E-04 | ZP_05739237.1  | 0.00614  | ZP_01054588.1  | 0.03956  |
| ZP_05785154.1  | 0.0226   | YP_165267.1    | 0.0383   | ZP_05122633.1  | 0.04115  |
| ZP_01879087.1  | 1.40E-04 | ZP_01036320.1  | 0.00602  | ZP_01743466.1  | 0.12198  |
| ZP_01447695.1  | 0.32248  | ZP_05842829.1  | 0.0606   | YP_001532352.1 | 0.08253  |
| YP_915443.1    | 0.07668  | YP_002520284.1 | 0        | YP_354693.1    | 0        |
| YP_001045764.1 | 0        | YP_001170094.1 | 0.01469  | YP_003578805.1 | 0.04886  |
| ZP_06351986.1  | 0.01198  | ZP_06542850.1  | 0.00577  | ZP_04562837.1  | 0.00294  |
| YP_003366266.1 | 0.03575  | YP_003003700.1 | 0.00838  | YP_003334327.1 | 0.01286  |
| ZP_05730617.1  | 0.01969  | YP_003296467.1 | 0.15204  | YP_001479594.1 | 0.04039  |
| YP_003520977.1 | 0.01118  | NP_416826.1    | 0.3704   | ZP_03377190.1  | 0.0789   |
| YP_001436999.1 | 0.00446  | YP_003211314.1 | 0.01132  | ZP_05968574.1  | 0.00985  |
| YP_001177587.1 | 0.04187  | YP_003614155.1 | 1.50E-04 | CBK87132.1     | 0.01061  |
| YP_002988184.1 | 0.10605  | YP_404083.1    | 1.60E-04 | NP_708205.1    | 1.40E-04 |
| YP_689808.1    | 0.0035   | ZP_06658259.1  | 0.04386  | YP_002382013.1 | 0.0021   |
| YP_001881145.1 | 0.00346  | pdb2VB7C       | 1.40E-04 | pdb1F91A       | 0        |
| pdb1EK4A       | 0        | pdb1H4FA       | 1.50E-04 | pdb2BYWA       | 0.00348  |
| pdb2BYZA       | 1.60E-04 | pdb2BYYA       | 0.00344  | pdb1DD8A       | 1.40E-04 |
| CAA09932.1     | 0.00346  | CAA09934.1     | 0.00346  | NP_311234.1    | 1.40E-04 |
| NP_288897.1    | 1.40E-04 | ZP_02901750.1  | 1.40E-04 | YP_003018371.1 | 1.60E-04 |
| ZP_03831287.1  | 0.00365  | YP_051153.1    | 0.01501  | YP_003258865.1 | 1.40E-04 |
| ZP_03828447.1  | 0.07472  | YP_001569590.1 | 0.00698  | YP_002227292.1 | 0        |
| NP_456920.1    | 0        | ZP_03350755.1  | 0        | YP_217367.1    | 0        |
| ZP_06546109.1  | 0        | YP_002237279.1 | 0.00347  | ZP_06016498.1  | 0.00346  |
| YP_001336360.1 | 1.40E-04 | YP_001452054.1 | 0.01896  | CAA09933.1     | 0.08311  |

KS3 Group 3G

|                |          |                |          |                |          |
|----------------|----------|----------------|----------|----------------|----------|
| YP_001907100.1 | 1.40E-04 | YP_003531781.1 | 0.0227   | YP_002648240.1 | 0.03392  |
| YP_455303.1    | 0.47637  | YP_588806.1    | 0.21594  | NP_660443.1    | 0.19854  |
| YP_002468408.1 | 1.40E-04 | NP_239925.1    | 0.00615  | NP_777716.1    | 0.25213  |
| YP_802627.1    | 0.43086  | NP_871411.1    | 0.3484   | NP_878781.1    | 0.27219  |
| YP_278005.1    | 0.113    | YP_003603350.1 | 0.26338  | YP_002923015.1 | 0.13762  |
| AAS62611.1     | 0        | NP_668909.1    | 0        | ZP_04629957.1  | 0.00568  |
| ZP_04635562.1  | 1.40E-04 | YP_071136.1    | 1.40E-04 | ZP_02333972.1  | 0.00512  |
| ZP_04612797.1  | 0.00512  | ZP_04632502.1  | 0.00513  | ZP_04640941.1  | 0.00889  |
| ZP_04620215.1  | 0.02554  | ZP_04624825.1  | 0.01142  | YP_001005608.1 | 0.01105  |
| ZP_04615159.1  | 0.00564  | ZP_06639397.1  | 0.02596  | ZP_06191145.1  | 0.01901  |
| YP_003040275.1 | 0.02879  | NP_930413.1    | 0.07194  | CBA76417.1     | 0.04171  |
| YP_003468863.1 | 0.16416  | ZP_06124683.1  | 0.01319  | ZP_03320363.1  | 0.0242   |
| ZP_05973837.1  | 0.01484  | ZP_03803448.1  | 0.0246   | YP_002151524.1 | 0.02502  |
| ZP_02961167.1  | 0.03993  | ZP_06715531.1  | 0.01722  | YP_002934130.1 | 1.60E-04 |
| YP_001344193.1 | 0.06492  | YP_088783.1    | 0.09368  | YP_003255459.1 | 0.03272  |
| YP_003007711.1 | 0.00178  | NP_245276.1    | 0.00859  | ZP_05919453.1  | 0.01068  |
| ZP_05992959.1  | 0.00415  | ZP_04976818.1  | 1.60E-04 | ZP_04752901.1  | 1.40E-04 |
| ZP_02477309.1  | 0        | YP_002476542.1 | 0        | ZP_03611905.1  | 0.02263  |
| NP_873153.1    | 0.02556  | ZP_00134992.2  | 0.00824  | YP_001968906.1 | 1.40E-04 |
| ZP_01785500.1  | 1.40E-04 | ZP_00157168.1  | 0        | ZP_01787708.1  | 0        |
| ZP_01790605.1  | 0        | YP_249062.1    | 0        | ZP_01793229.1  | 0        |
| ZP_01797646.1  | 0        | ZP_00155106.2  | 0        | NP_439682.1    | 0        |
| ZP_04467254.1  | 0.00418  | YP_718877.1    | 0.04349  | ZP_01957620.1  | 0.00592  |
| ZP_06081012.1  | 0.01182  | ZP_05881259.1  | 0.03452  | ZP_01218778.1  | 0.01218  |
| ZP_06154807.1  | 1.40E-04 | ZP_01235107.1  | 0.01207  | ZP_01159327.1  | 0.0059   |
| ZP_01816638.1  | 0.00512  | ZP_05885353.1  | 0.0091   | ZP_01258865.1  | 0        |
| ZP_04921896.1  | 0        | ZP_06182546.1  | 0.00582  | ZP_05119018.1  | 0.02829  |
| YP_001446281.1 | 1.40E-04 | ZP_01987087.1  | 1.40E-04 | NP_798573.1    | 1.40E-04 |
| ZP_05908382.1  | 1.40E-04 | ZP_05944922.1  | 0.00843  | ZP_02195796.1  | 1.40E-04 |
| ZP_01867568.1  | 0.03788  | NP_760859.1    | 0.03     | ZP_00993114.1  | 0        |
| ZP_01067044.1  | 0        | YP_205083.1    | 0.03448  | ZP_05876619.1  | 0.03204  |
| YP_002262558.1 | 0.06259  | ZP_06054151.1  | 0.01883  | YP_130838.1    | 0.05939  |
| ZP_04919940.1  | 1.50E-04 | ZP_04411481.1  | 1.50E-04 | ZP_06033950.1  | 0.00587  |
| ZP_05716160.1  | 0.00589  | ZP_06038580.1  | 1.40E-04 | ZP_01978233.1  | 0.0058   |
| ZP_01676599.1  | 1.40E-04 | YP_856451.1    | 0.03472  | YP_001142162.1 | 0.04432  |
| YP_270470.1    | 0.14914  | ZP_01135065.1  | 0.01047  | YP_340579.1    | 0.01138  |
| ZP_01613390.1  | 1.30E-04 | YP_002892770.1 | 0.09373  | ZP_01216827.1  | 0.06832  |
| YP_943359.1    | 0.05706  | ZP_01899169.1  | 0.13592  | ZP_01044222.1  | 0.02889  |
| YP_155410.1    | 0.0239   | YP_662943.1    | 0.12568  | YP_002125502.1 | 0.15952  |
| ZP_01450055.1  | 0.10829  | YP_928029.1    | 0.03862  | YP_962955.1    | 0        |
| YP_001051102.1 | 0        | YP_001183965.1 | 0        | YP_001366960.1 | 0        |
| ZP_01706414.1  | 1.40E-04 | YP_737543.1    | 0        | YP_733557.1    | 0        |
| YP_869115.1    | 0.00608  | NP_718636.1    | 0.03722  | YP_750081.1    | 0.03756  |

KS3 Group 3G

|                |          |                |          |                |          |
|----------------|----------|----------------|----------|----------------|----------|
| YP_001094535.1 | 0.03537  | YP_002312420.1 | 0.01602  | ABN80398.1     | 0.03454  |
| YP_003557639.1 | 0.02338  | ZP_02157419.1  | 0.00618  | YP_001761374.1 | 0.02193  |
| YP_001473383.1 | 0.00842  | YP_001501466.1 | 0.00541  | YP_001674867.1 | 0.0985   |
| YP_562490.1    | 0.02887  | ZP_01618174.1  | 0.1353   | ZP_01113650.1  | 0.1424   |
| ZP_01078643.1  | 0.05386  | YP_001343072.1 | 0.03576  | ZP_01166523.1  | 0.10146  |
| XP_001618992.1 | 0.10272  | ZP_05096649.1  | 0.11785  | ZP_05129002.1  | 0.04147  |
| ZP_01102057.1  | 0.03027  | ZP_01625044.1  | 0.10054  | ZP_04956559.1  | 0.07778  |
| ZP_05041487.1  | 0.01568  | YP_692554.1    | 0.02116  | YP_572517.1    | 0.07124  |
| YP_001001615.1 | 0.11587  | YP_742212.1    | 0.12548  | YP_001981258.1 | 0.09085  |
| YP_003072546.1 | 0.07114  | YP_526472.1    | 0.06233  | YP_437473.1    | 0.26831  |
| YP_003147269.1 | 0.19312  | ZP_01224524.1  | 0.31419  | ZP_01736169.1  | 0.15492  |
| ZP_01895347.1  | 0.16661  | ZP_05103687.1  | 0.11731  | XP_002295282.1 | 0.30313  |
| XP_002184832.1 | 0.1343   | YP_002800050.1 | 0.07428  | YP_001187958.1 | 0.03201  |
| YP_258862.1    | 0.0219   | YP_609144.1    | 0.00623  | YP_001267033.1 | 0        |
| NP_746292.1    | 0        | YP_001669972.1 | 1.60E-04 | YP_001750350.1 | 0.00622  |
| YP_349941.1    | 0.01439  | YP_001172408.1 | 0.08636  | AAC45620.1     | 0.04117  |
| NP_250300.1    | 1.60E-04 | YP_001349019.1 | 0        | ZP_01364959.1  | 0        |
| YP_791642.1    | 0        | ZP_04928032.1  | 0        | YP_002871471.1 | 0.0194   |
| YP_274213.1    | 1.60E-04 | ZP_04591091.1  | 0.00613  | NP_792031.1    | 0.01215  |
| AAO50078.1     | 0.08054  | YP_235100.1    | 0.0174   | YP_392209.1    | 0.16151  |
| YP_972495.1    | 1.50E-04 | ZP_04764797.1  | 0.08833  | ZP_06211922.1  | 1.50E-04 |
| YP_996926.1    | 0.10404  | YP_001562303.1 | 0.06302  | YP_984852.1    | 0.04842  |
| ZP_03541121.1  | 0.0164   | YP_003280282.1 | 0.08096  | YP_001970478.1 | 1.40E-04 |
| ZP_05137281.1  | 1.20E-04 | YP_002026841.1 | 0.00748  | NP_643932.1    | 0.01162  |
| YP_365473.1    | 0.01177  | ZP_06729897.1  | 1.40E-04 | ZP_06703707.1  | 0.00634  |
| ZP_06487012.1  | 1.40E-04 | YP_199400.1    | 0        | YP_001915613.1 | 0        |
| ZP_02244704.1  | 0.00578  | ZP_06489461.1  | 0.00576  | YP_244713.1    | 0.01734  |
| NP_635973.1    | 0.1014   | ZP_01736726.1  | 0.19222  | YP_960409.1    | 0.07772  |
| ZP_01893796.1  | 0.0409   | ZP_05620248.1  | 0.21921  | YP_003626389.1 | 0.14893  |
| YP_581450.1    | 0.02653  | YP_265181.1    | 0.00765  | ZP_06241817.1  | 1.00463  |
| ZP_06244121.1  | 0.68676  | YP_900594.1    | 0.56429  | YP_065595.1    | 0.38517  |
| ADH85832.1     | 0.10426  | ZP_01289644.1  | 0.11602  | YP_002990144.1 | 0.72822  |
| ZP_06369008.1  | 0.55425  | YP_358070.1    | 0.53528  | ZP_03738400.1  | 0.59497  |
| ZP_01312283.1  | 0.47074  | ZP_05311652.1  | 0.45336  | YP_003059691.1 | 0.89283  |
| CAM75572.1     | 0.27195  | YP_001974187.1 | 0.04928  | YP_002030290.1 | 0.03464  |
| YP_586526.1    | 0.34265  | ZP_06209943.1  | 0.1718   | YP_001893285.1 | 0.05717  |
| YP_001896667.1 | 0.01675  | ZP_03270486.1  | 0.05483  | ZP_06293524.1  | 0.01484  |
| ZP_06464973.1  | 0.04684  | ZP_02381937.1  | 0.07285  | YP_775499.1    | 0.04589  |
| ZP_02909368.1  | 0.03697  | YP_001810767.1 | 0.24446  | YP_001856938.1 | 0.04292  |
| NP_521919.1    | 0.04091  | ZP_05623763.1  | 0.53186  | YP_003251061.1 | 0.26867  |
| YP_001980641.1 | 0.29061  | YP_154535.1    | 0.30418  | YP_341893.1    | 0.1603   |
| ZP_01896905.1  | 0.33213  | YP_003074646.1 | 0.39093  | YP_749038.1    | 0.12006  |
| YP_929266.1    | 0.14262  | YP_732472.1    | 1.50E-04 | YP_867975.1    | 0.01141  |



KS3 Group 3G

|                |          |                |          |                |          |
|----------------|----------|----------------|----------|----------------|----------|
| NP_719907.1    | 0.02032  | YP_001364558.1 | 0        | YP_002356293.1 | 0        |
| YP_001048729.1 | 1.50E-04 | YP_001552773.1 | 1.50E-04 | ZP_01705090.1  | 1.60E-04 |
| YP_001181962.1 | 0.00591  | YP_961690.1    | 0.00591  | YP_001762957.1 | 0.08266  |
| YP_001503748.1 | 0.05213  | YP_001672600.1 | 0.10867  | YP_001095651.1 | 0.07712  |
| YP_002309713.1 | 0.11147  | YP_001472051.1 | 0.06546  | ZP_02157933.1  | 0.37669  |
| YP_003558856.1 | 1.50E-04 | YP_001342721.1 | 0.28476  | ZP_05919802.1  | 0.28534  |
| YP_857871.1    | 0.00774  | YP_001140807.1 | 0.04448  | ZP_04638062.1  | 0.00534  |
| YP_001005252.1 | 0.02581  | ZP_04620318.1  | 0.27346  | ZP_04611989.1  | 0.02527  |
| ZP_04633920.1  | 0.00663  | ZP_06637042.1  | 0.07021  | ZP_06191665.1  | 0.08008  |
| YP_001477137.1 | 0.0774   | YP_002384546.1 | 0.00789  | YP_002414606.1 | 1.50E-04 |
| NP_753105.1    | 0.00582  | YP_405089.1    | 0.00578  | NP_290040.1    | 1.40E-04 |
| YP_001178605.1 | 0.03431  | YP_003518859.1 | 0.03763  | YP_003294879.1 | 0.05992  |
| ZP_04559290.1  | 0.02996  | YP_001456404.1 | 0.01806  | YP_003367734.1 | 0.0288   |
| YP_003615331.1 | 0.02587  | CBK86176.1     | 0.08013  | ZP_06015414.1  | 0.06796  |
| YP_003335713.1 | 0.07498  | YP_003261877.1 | 1.50E-04 | YP_052574.1    | 0.01338  |
| ZP_03827557.1  | 0.12999  | YP_003212367.1 | 0.05656  | ZP_03727415.1  | 0.31576  |
| ZP_01216612.1  | 0.30538  | ZP_01234257.1  | 0.10244  | YP_131777.1    | 0.01627  |
| ZP_01217868.1  | 0.00786  | YP_204243.1    | 0.10243  | NP_797260.1    | 0.04428  |
| ZP_05877007.1  | 0.1121   | ZP_05944258.1  | 0.02584  | ZP_05120212.1  | 0.01916  |
| ZP_06181969.1  | 0.00663  | ZP_01261993.1  | 0        | ZP_04923335.1  | 0        |
| ZP_01867991.1  | 0.09924  | ZP_01064513.1  | 0.01468  | YP_002416393.1 | 2.40E-04 |
| ZP_01813068.1  | 0.0386   | NP_933859.1    | 0.01874  | NP_759076.1    | 0.07477  |
| YP_003147765.1 | 0.38694  | YP_001412778.1 | 0.47568  | YP_257605.1    | 0.06751  |
| YP_346155.1    | 0.05183  | YP_606122.1    | 0.04128  | ZP_05637566.1  | 0.00604  |
| YP_233530.1    | 0.01349  | YP_272715.1    | 1.40E-04 | ZP_06457975.1  | 0        |
| ZP_06478783.1  | 0        | NP_794842.1    | 0.00694  | ZP_03397599.1  | 1.40E-04 |
| ZP_04586576.1  | 0.02314  | YP_002870098.1 | 0.10885  | XP_001618177.1 | 0.18821  |
| YP_001633057.1 | 0.12741  | ZP_06687146.1  | 0.15205  | ZP_05988516.1  | 1.40E-04 |
| ZP_04977578.1  | 0.00634  | ZP_05992663.1  | 1.40E-04 | YP_003008136.1 | 0.06045  |
| YP_003255154.1 | 0.01011  | ZP_06635559.1  | 0.00841  | YP_718312.1    | 0.01282  |
| YP_001785307.1 | 1.40E-04 | ZP_03719734.1  | 0.00661  | ZP_04758084.1  | 1.50E-04 |
| ZP_05984899.2  | 0.01681  | ZP_05318198.1  | 0.00753  | ZP_05983470.2  | 0.01765  |
| YP_001599720.1 | 1.60E-04 | YP_002343230.1 | 0.00688  | CBA09413.1     | 0.01467  |
| NP_274707.1    | 0.02334  | YP_975584.1    | 0.0333   | ZP_05986086.2  | 0.01299  |
| ZP_06863400.2  | 0.00675  | ZP_04603126.1  | 0.08753  | ZP_06753525.1  | 0.09986  |
| ZP_06735094.1  | 0.01027  | ZP_03714795.1  | 0.01431  | ZP_05704912.1  | 0.30724  |
| YP_001407754.1 | 0.11583  | YP_001467518.1 | 0.17357  | ZP_03611136.1  | 0.11297  |
| ZP_05362819.1  | 0.03068  | ZP_04755453.1  | 0.16186  | YP_001677817.1 | 0.11705  |
| YP_001083580.1 | 0        | YP_001845193.1 | 0        | ABO10978.2     | 0        |
| ZP_06058731.1  | 0.07795  | YP_045329.1    | 0.32082  | ZP_05070175.1  | 0.67188  |
| ZP_01910260.1  | 0.34207  | YP_003388000.1 | 0.35983  | ZP_01117271.1  | 0.18537  |
| ZP_01053339.1  | 0.20471  | ZP_01202446.1  | 0.50997  | YP_003094878.1 | 0.50548  |
| YP_003124664.1 | 0.26142  | ZP_01048795.1  | 0.40714  | YP_861647.1    | 0.54145  |

# KS3 Group 3G

|                |          |                |          |                |          |
|----------------|----------|----------------|----------|----------------|----------|
| ZP_01061756.1  | 0.38855  | YP_001196140.1 | 0.24003  | YP_003091915.1 | 0.1794   |
| ZP_01884185.1  | 0.2017   | ZP_01891871.1  | 0.51745  | ZP_00950829.1  | 0.54354  |
| YP_003195935.1 | 0.4522   | YP_002430915.1 | 0.39465  | YP_463036.1    | 0.29733  |
| NP_819090.1    | 0.38421  | YP_066139.1    | 0.2304   | YP_003549038.1 | 0.17151  |
| YP_001820167.1 | 0.13233  | ZP_03726674.1  | 0.14627  | ZP_05060006.1  | 0.13641  |
| ZP_01877447.1  | 0.47428  | ZP_01092567.1  | 0.32058  | YP_003372751.1 | 0.20201  |
| NP_864493.1    | 0.27101  | ZP_01854488.1  | 0.29671  | YP_070001.1    | 0        |
| YP_001401488.1 | 0        | NP_670016.1    | 0        | ZP_06203956.1  | 0        |
| YP_001607339.1 | 0.14897  | YP_846744.1    | 0.52984  | ZP_01908955.1  | 0.45141  |
| ZP_06890133.1  | 1.3977   | ZP_02163873.1  | 0.74185  | AAW33972.1     | 0.43113  |
| YP_002483589.1 | 0.68873  | YP_439865.1    | 0.58858  | ABK51298.1     | 0.01454  |
| ABM63532.1     | 0.02714  | YP_001613821.1 | 0.24241  | ZP_05496377.1  | 0.23226  |
| ZP_06873403.1  | 0.0574   | ZP_03591438.1  | 0.17592  | NP_389594.2    | 1.50E-04 |
| CAC85720.1     | 0.63949  | ZP_05543655.1  | 0.25129  | YP_003124933.1 | 0.49988  |
| YP_001078306.1 | 0        | YP_111004.1    | 0        | YP_105856.1    | 0        |
| ZP_02406650.1  | 0        | YP_001420576.1 | 0.56957  | AAM12921.1     | 0.55706  |
| ZP_02467740.1  | 0.36715  | ZP_06562045.1  | 0        | YP_001106769.1 | 0        |
| BAF50726.1     | 0.24224  | ZP_06217415.1  | 0.06278  | ZP_06399726.1  | 0.05734  |
| ZP_05004596.1  | 0.83096  | YP_001547669.1 | 0.76356  | ZP_06187207.1  | 0.25647  |
| ZP_05110122.1  | 0.20788  | YP_122466.1    | 0.00251  | YP_094156.1    | 0.0031   |
| YP_003617312.1 | 1.60E-04 | YP_822027.1    | 0.42575  | YP_425285.1    | 0.54539  |
| YP_002361554.1 | 0.41026  | ZP_06889914.1  | 0.35437  | ZP_06886339.1  | 0.21     |
| YP_003578022.1 | 0.43267  | ZP_05843115.1  | 0.15174  | ZP_05782268.1  | 0.12002  |
| ZP_01003414.1  | 0.05465  | ZP_01752085.1  | 0.07337  | ZP_01156191.1  | 0.1256   |
| ZP_01745477.1  | 0.11226  | YP_001532959.1 | 0.06797  | ZP_01742362.1  | 0.20713  |
| YP_510090.1    | 0.2629   | YP_915044.1    | 0.23671  | YP_001043301.1 | 1.60E-04 |
| YP_352835.1    | 0.0502   | YP_002525444.1 | 1.40E-04 | YP_001167244.1 | 1.50E-04 |
| ZP_05051950.1  | 0.02094  | ZP_05064639.1  | 0.10319  | ZP_05102230.1  | 0.19929  |
| ZP_02153734.1  | 0.07812  | YP_167167.1    | 0.03765  | ZP_05787692.1  | 0.04002  |
| ZP_05123439.1  | 0.04626  | ZP_00962398.1  | 0.03185  | ZP_00954919.1  | 0.0062   |
| ZP_05090672.1  | 0.01932  | ZP_02150668.1  | 1.50E-04 | ZP_02143887.1  | 0.00381  |
| ZP_01903823.1  | 0.03935  | ZP_01880841.1  | 0.01376  | ZP_01033905.1  | 0.02364  |
| ZP_01001483.1  | 0.06582  | ZP_00960851.1  | 0.14115  | ZP_05074687.1  | 0.0782   |
| ZP_02139327.1  | 0.02886  | YP_682858.1    | 0.01471  | ZP_01056837.1  | 0.0396   |
| ZP_01753548.1  | 0.05242  | ZP_05079061.1  | 0.04269  | YP_613216.1    | 0.00851  |
| ZP_05742903.1  | 0.02334  | ZP_01448490.1  | 0.23868  | ZP_01012728.1  | 0.33724  |
| ZP_05341319.1  | 0.33139  | YP_003376267.1 | 0.39835  | ZP_02164519.1  | 0.48284  |
| YP_002278994.1 | 0.24517  | ABR15465.1     | 0.33982  | CAA68624.1     | 0.08204  |
| YP_770460.1    | 0.15295  | prf1205214B    | 0.00938  | YP_001314742.1 | 0.05372  |
| spP06231.1     | 0.01343  | NP_435712.1    | 1.50E-04 | ZP_05809525.1  | 0.36203  |
| NP_106417.1    | 0.13237  | YP_002973093.1 | 0.06056  | spP04684.2     | 0.02831  |
| spP72331.1     | 0.17129  | NP_105705.1    | 0.2968   | ZP_05809301.1  | 0.14844  |
| CAH04365.1     | 0.27662  | YP_425137.1    | 0.48174  | ZP_06866047.1  | 0.55535  |

KS3 Group 3G

|                |         |                |          |                |          |
|----------------|---------|----------------|----------|----------------|----------|
| ZP_05375535.1  | 0.39707 | ZP_06349120.1  | 0.27104  | CBA28206.1     | 0.93289  |
| YP_001702764.1 | 0.45054 | ABW82983.1     | 0.27252  | ABA18621.1     | 0.40559  |
| YP_001268289.1 | 0.05849 | NP_744922.1    | 0.16802  | YP_002912095.1 | 0.58484  |
| YP_786289.1    | 0.26119 | ZP_06688702.1  | 0.33768  | YP_001632743.1 | 0.16872  |
| ZP_04765069.1  | 0.56563 | CAZ89852.1     | 0.32941  | YP_525230.1    | 0.22004  |
| ZP_03699663.1  | 0.27092 | YP_002943762.1 | 0.45936  | YP_284398.1    | 0.30245  |
| YP_525228.1    | 0.42676 | YP_003261975.1 | 0.31563  | YP_003165661.1 | 0.26301  |
| YP_287366.1    | 0.10362 | YP_001155735.1 | 0.76581  | YP_003523075.1 | 0.16343  |
| ZP_04832190.1  | 0.15875 | YP_003050973.1 | 0.2133   | XP_002534562.1 | 0.32703  |
| ADI30159.1     | 0.37153 | YP_982895.1    | 0.77259  | ZP_03627763.1  | 0.82886  |
| YP_003588935.1 | 0.6125  | ZP_03492992.1  | 0.01669  | YP_003185809.1 | 0.0236   |
| ZP_06244137.1  | 0.64059 | YP_065585.1    | 0.64746  | ADH85820.1     | 0.06058  |
| ZP_01289526.1  | 0.23961 | ZP_05311668.1  | 0.35412  | YP_002990129.1 | 0.6173   |
| YP_358056.1    | 0.54468 | YP_900613.1    | 0.58372  | ZP_01312263.1  | 0.50494  |
| ZP_06369022.1  | 0.77772 | ZP_03738381.1  | 0.3982   | ZP_06256113.1  | 0.57517  |
| ZP_05917369.1  | 0.06872 | ZP_06422628.1  | 0.10289  | YP_003121558.1 | 0.42979  |
| ZP_00949726.1  | 0.58659 | ZP_03390222.1  | 0.58164  | ZP_03850764.1  | 0.50278  |
| YP_001193445.1 | 0.44356 | YP_003585289.1 | 0.70673  | ZP_03678619.1  | 0.02483  |
| ZP_03016934.1  | 0.04508 | ZP_05758307.1  | 1.40E-04 | ZP_02064220.1  | 0.13826  |
| ZP_04549656.1  | 0.19801 | YP_003086380.1 | 0.96172  | YP_678723.1    | 0.64296  |
| ZP_06244130.1  | 0.94708 | ZP_03738389.1  | 0.51828  | ZP_01312271.1  | 0.46715  |
| ZP_05311663.1  | 0.37945 | YP_065576.1    | 0.64011  | ADH85811.1     | 0.15653  |
| ZP_01289517.1  | 0.16713 | YP_285580.1    | 0.83256  | YP_002945266.1 | 0.41821  |
| YP_525206.1    | 0.13517 | YP_003522985.1 | 0.29375  | YP_003061266.1 | 1.06939  |
| YP_003305157.1 | 0.71428 | YP_003656472.1 | 0.88503  | ZP_05070763.1  | 0.78523  |
| YP_861700.1    | 0.32684 | ZP_04056549.1  | 0.15998  | YP_003140863.1 | 0.02521  |
| ZP_03390320.1  | 0.01044 | ZP_03850767.1  | 0.20265  | YP_001297122.1 | 0.14163  |
| YP_001193440.1 | 0.10557 | ZP_00949723.1  | 0.39493  | YP_003585286.1 | 0.31417  |
| YP_003121563.1 | 0.53494 | ZP_05253891.1  | 0.1162   | ZP_03300367.1  | 1.50E-04 |
| ZP_06088479.1  | 0.00647 | ZP_06743051.1  | 0.01979  | YP_001298335.1 | 0.01985  |
| ZP_03016936.1  | 0.02035 | ZP_03678617.1  | 1.40E-04 | ZP_02064218.1  | 1.60E-04 |
| ZP_05758309.1  | 0.11812 | ZP_04549654.1  | 1.50E-04 | YP_003086377.1 | 0.60822  |
| ZP_06418846.1  | 0.33791 | ZP_06422626.1  | 0.05934  | ZP_05917367.1  | 0.06267  |
| ZP_06256115.1  | 0.28382 | YP_678720.1    | 0.46734  | YP_003126446.1 | 0.47657  |
| YP_003090156.1 | 0.60846 | YP_677014.1    | 0.37498  | YP_003305170.1 | 0.37573  |
| YP_003656486.1 | 0.37345 | ZP_05070543.1  | 0.56952  | YP_586523.1    | 0.42383  |
| CAM75569.1     | 0.4558  | YP_003147762.1 | 0.52001  | ZP_01896908.1  | 0.64817  |
| YP_154532.1    | 0.36639 | YP_001342718.1 | 0.51245  | ZP_06209946.1  | 0.30944  |
| NP_521922.1    | 0.19131 | ZP_02909365.1  | 0.02605  | ZP_03588220.1  | 0.01456  |
| ZP_03569678.1  | 0.00818 | ZP_02884828.1  | 0.05346  | YP_001856935.1 | 0.22284  |
| ZP_06293527.1  | 0.07583 | ZP_03267920.1  | 0.05102  | YP_003605839.1 | 0.03121  |
| YP_272718.1    | 0.00718 | ZP_05637569.1  | 0.00822  | ZP_06457977.1  | 1.50E-04 |
| ZP_06478786.1  | 0.01812 | YP_606125.1    | 0.28735  | YP_257608.1    | 0.31767  |

# KS3 Group 3G

|                |          |                |          |                |          |
|----------------|----------|----------------|----------|----------------|----------|
| YP_001412775.1 | 0.49989  | YP_003059688.1 | 0.67551  | YP_001633054.1 | 0.45218  |
| ZP_04603067.1  | 0.20752  | ZP_04757853.1  | 0.01004  | ZP_05985026.1  | 0.02048  |
| ZP_03719441.1  | 0.04392  | ZP_04977582.1  | 0.18787  | ZP_05988520.1  | 0.07989  |
| YP_003008133.1 | 0.19427  | ZP_06635562.1  | 0.10458  | YP_003255157.1 | 0.01012  |
| YP_001974190.1 | 0.02862  | YP_002030293.1 | 0.0454   | YP_002263465.1 | 0.37126  |
| ZP_01064510.1  | 0.22392  | YP_002416396.1 | 0.08546  | ZP_01813071.1  | 0.22689  |
| ZP_00990958.1  | 0.26009  | ZP_01867988.1  | 0.22102  | ZP_06181966.1  | 0.01056  |
| ZP_01261990.1  | 0.00635  | ZP_04923333.1  | 0.00637  | ZP_01990640.1  | 1.50E-04 |
| NP_797263.1    | 0.03341  | ZP_01162777.1  | 0.31622  | ZP_01217871.1  | 0.04076  |
| ZP_06080406.1  | 0.25838  | ZP_03725944.1  | 0.47919  | YP_045326.1    | 0.5915   |
| ZP_04633923.1  | 0.17441  | YP_001005249.1 | 0.12891  | YP_003261874.1 | 0.03014  |
| ZP_03827560.1  | 0.08003  | YP_052577.1    | 0.05481  | YP_003212364.1 | 0.2062   |
| CBK86173.1     | 0.26263  | YP_003294882.1 | 0.06925  | ZP_06015417.1  | 0.2125   |
| YP_003518856.1 | 0.06804  | YP_001456401.1 | 0.09886  | YP_003367737.1 | 0.03789  |
| YP_003501647.1 | 0        | ZP_04001798.1  | 0        | NP_753108.1    | 0        |
| NP_290037.1    | 0.00661  | ZP_05433023.1  | 1.40E-04 | YP_002414603.1 | 1.40E-04 |
| ZP_06650994.1  | 1.40E-04 | YP_002384543.1 | 0.00666  | ZP_06659530.1  | 0.00664  |
| ZP_04559287.1  | 0.12406  | YP_001677814.1 | 0.49805  | ZP_05919799.1  | 0.43818  |
| YP_003558853.1 | 0.07287  | ZP_02157936.1  | 0.0697   | YP_001095648.1 | 0.35539  |
| YP_001762954.1 | 0.11143  | YP_001472054.1 | 0.15752  | YP_929263.1    | 0.24017  |
| YP_002309716.1 | 0.26323  | YP_001672603.1 | 0.26157  | YP_003251064.1 | 0.86118  |
| ZP_03611145.1  | 0.28803  | YP_001467520.1 | 0.28945  | YP_003632733.1 | 0.5976   |
| ZP_05623767.1  | 0.60634  | ZP_01910256.1  | 0.80287  | ZP_01054985.1  | 0.85384  |
| ACY68244.1     | 0.24069  | YP_001829917.1 | 0.06757  | YP_001775816.1 | 0        |
| ZP_00651695.1  | 0        | NP_298928.1    | 0.00647  | NP_779348.1    | 1.40E-04 |
| ZP_00681162.1  | 0.00647  | YP_003374674.1 | 0.15755  | NP_639337.1    | 0.00724  |
| YP_245146.1    | 0.06638  | ZP_06486300.1  | 0.02538  | ZP_06491917.1  | 0.08029  |
| YP_199102.1    | 0.04486  | YP_365903.1    | 0.03322  | ZP_02241507.1  | 0        |
| YP_449456.1    | 0        | ZP_06703070.1  | 0.02193  | NP_644385.1    | 0.02079  |
| YP_002942191.1 | 0.36006  | YP_003459726.1 | 0.46247  | YP_001980621.1 | 0.61591  |
| YP_001020521.1 | 0.44855  | YP_298128.1    | 0.24486  | YP_622026.1    | 0.12296  |
| ZP_02382200.1  | 0.11261  | ZP_02894607.1  | 0.10504  | YP_002229992.1 | 0.02821  |
| YP_001809378.1 | 1.40E-04 | YP_774708.1    | 0.06148  | YP_001120697.1 | 0.18388  |
| YP_001897894.1 | 0.04119  | YP_002980293.1 | 0.06499  | ZP_00943634.1  | 0.1394   |
| NP_518548.1    | 0.10286  | YP_002258668.1 | 0.00609  | YP_002256260.1 | 0.01897  |
| YP_316511.1    | 0.23997  | YP_981607.1    | 0.25545  | YP_935413.1    | 0.30817  |
| YP_003165650.1 | 0.18313  | YP_287381.1    | 0.26464  | ADI30685.1     | 0.39606  |
| YP_002219394.1 | 0.31575  | ZP_03699668.1  | 0.21923  | YP_525213.1    | 0.34372  |
| YP_001101111.1 | 0.38799  | YP_113407.1    | 0.21926  | YP_003264101.1 | 0.30251  |
| YP_003522979.1 | 0.39294  | YP_003074629.1 | 0.68912  | YP_743852.1    | 0.42303  |
| YP_191804.1    | 0.57441  | YP_634519.1    | 0.79619  | ZP_01466318.1  | 0.46386  |
| ZP_03104663.1  | 0        | ZP_04221301.1  | 0        | ZP_02356591.1  | 0.00633  |
| ZP_02367317.1  | 1.50E-04 | YP_048723.1    | 0.30757  | AAB41300.1     | 0.09235  |

KS3 Group 3G

|                |         |                |          |                |          |
|----------------|---------|----------------|----------|----------------|----------|
| ZP_04589966.1  | 0       | NP_794432.1    | 0        | ZP_06482660.1  | 1.40E-04 |
| YP_003493452.1 | 0.32725 | YP_003450264.1 | 0.39018  | YP_003134783.1 | 0.645    |
| YP_001613990.1 | 0.54521 | ZP_06811707.1  | 1.06066  | NP_242706.1    | 0.33622  |
| ZP_04081953.1  | 0.46588 | AAO39098.1     | 0.09982  | ZP_01815417.1  | 0.20345  |
| NP_687689.1    | 0.05578 | NP_735104.1    | 0        | AAD45681.1     | 0        |
| ZP_00789999.1  | 0       | NP_951519.1    | 0.19509  | YP_002537369.1 | 0.28449  |
| YP_001232333.1 | 0.17152 | YP_384651.1    | 0.17865  | YP_001952429.1 | 0.38611  |
| CAD62192.1     | 1.16577 | ZP_04604272.1  | 0.76478  | CBL15495.1     | 0.1329   |
| YP_003250871.1 | 0.31171 | YP_002935560.1 | 0.19577  | ZP_00740887.1  | 0.02539  |
| ZP_04069494.1  | 0.02942 | ZP_01306711.1  | 0.36066  | ZP_01306707.1  | 0.25857  |
| YP_002152609.1 | 0.00829 | ZP_03839484.1  | 0.02264  | ZP_05727900.1  | 0.10113  |
| YP_003498860.1 | 0       | ZP_06656970.1  | 0        | NP_287053.1    | 0        |
| ZP_05948313.1  | 0.05636 | YP_003611540.1 | 0.13027  | NP_903619.1    | 0.7636   |
| YP_002505218.1 | 1.07945 | YP_001231278.1 | 0.75008  | YP_634524.1    | 0.7157   |
| ZP_01999726.1  | 0.36409 | CAL48955.1     | 0.67934  | CAJ73555.1     | 0.67702  |
| ACH85583.1     | 0.93413 | ZP_05517491.1  | 0.2487   | ADI09863.1     | 0.10894  |
| NP_824842.1    | 0.14329 | ZP_05486658.1  | 0.02792  | ZP_05509590.1  | 0.02597  |
| ZP_04685000.1  | 0.09702 | YP_001824766.1 | 0.22986  | ZP_05541598.1  | 0.23394  |
| ZP_05480788.1  | 0.32561 | YP_001159614.1 | 0.49635  | YP_003339835.1 | 0.20489  |
| ZP_05508656.1  | 0.37146 | CAJ74368.1     | 0.6453   | ZP_03630179.1  | 0.41196  |
| ZP_03132299.1  | 0.45627 | ZP_02929866.1  | 0.52648  | ZP_03628562.1  | 0.37152  |
| ZP_03126848.1  | 0.45961 | CAJ74110.1     | 0.76079  | ZP_06400217.1  | 0.00623  |
| ZP_06215423.1  | 0.00656 | YP_001159318.1 | 0.14754  | YP_001537505.1 | 0.09495  |
| ZP_05513707.1  | 0.26704 | ADI04730.1     | 0.0901   | YP_003492515.1 | 0.07819  |
| ZP_06905331.1  | 0.82728 | ZP_05508643.1  | 0.24815  | ZP_06473129.1  | 0.3476   |
| NP_348627.1    | 0.58053 | ZP_06143152.1  | 0.24974  | CBL18213.1     | 0.24034  |
| ZP_00738592.1  | 0.02846 | ZP_04069482.1  | 0.10274  | YP_001616566.1 | 0.91391  |
| YP_911568.1    | 1.28212 | CAJ74107.1     | 0.78705  | YP_760853.1    | 0.27541  |
| YP_756448.1    | 0.31336 | ZP_00957634.1  | 0.16178  | YP_425510.1    | 0.12714  |
| YP_003448854.1 | 0.23398 | CAM75914.1     | 0.15572  | ZP_00051952.1  | 0.01745  |
| YP_421471.1    | 0.01011 | ZP_01446594.1  | 0.22328  | ZP_05340843.1  | 0.08435  |
| ZP_01744433.1  | 0.10978 | YP_509571.1    | 0.16664  | ZP_01751699.1  | 0.09666  |
| ZP_02138783.1  | 0.0375  | YP_683235.1    | 0.01358  | ZP_05781152.1  | 0.11375  |
| ZP_00955630.1  | 0.03785 | ZP_01158323.1  | 0.26462  | ZP_05063460.1  | 0.13214  |
| ZP_05052953.1  | 0.04659 | ZP_01444882.1  | 0.07796  | YP_916684.1    | 0.10313  |
| YP_003577832.1 | 0.07824 | ZP_02154033.1  | 0.07571  | ZP_05100647.1  | 0.09195  |
| YP_613049.1    | 0.02331 | ZP_05742946.1  | 0.00259  | YP_167495.1    | 0.01189  |
| ZP_05787317.1  | 0.05067 | ZP_05124055.1  | 0.00479  | ZP_05077096.1  | 0.02243  |
| ZP_05090152.1  | 0.02135 | ZP_02144078.1  | 1.50E-04 | ZP_02150089.1  | 0.00525  |
| ZP_01057317.1  | 0.03895 | ZP_01755057.1  | 0.02208  | ZP_00958385.1  | 0.11454  |
| ZP_01741243.1  | 0.08607 | ZP_01004664.1  | 0.16268  | YP_001533517.1 | 0.12878  |
| ZP_05075472.1  | 0.06235 | ZP_01001466.1  | 0.11281  | ZP_05844994.1  | 0.09085  |
| ZP_01902406.1  | 0.10872 | ZP_01035445.1  | 0.02544  | ZP_01878745.1  | 0.01823  |

KS3 Group 3G

|                |          |                |          |                |          |
|----------------|----------|----------------|----------|----------------|----------|
| ZP_01012755.1  | 0.11596  | YP_001167277.1 | 0.10524  | YP_002525140.1 | 0        |
| YP_001043008.1 | 0        | YP_352524.1    | 0.0033   | YP_002289344.1 | 0.12091  |
| YP_782217.1    | 0.09644  | YP_486085.1    | 0.03763  | NP_948411.1    | 0.01899  |
| YP_001992458.1 | 0.00366  | ZP_06357863.1  | 0.01053  | YP_532175.1    | 0.20525  |
| YP_570104.1    | 0.05754  | ZP_05115779.1  | 0.12411  | ZP_01545555.1  | 0.15802  |
| ZP_06865428.1  | 0.10052  | YP_002361225.1 | 0.08827  | YP_001833399.1 | 0.14429  |
| YP_001418020.1 | 0.06137  | YP_001527231.1 | 0.07722  | YP_001414618.1 | 0.21104  |
| ZP_06349057.1  | 0.14368  | ZP_06886293.1  | 0.16351  | ZP_05375659.1  | 0.18787  |
| YP_001754577.1 | 0.11316  | YP_002498039.1 | 0.0129   | YP_001770037.1 | 0.0419   |
| YP_001638045.1 | 0.04189  | YP_002961604.1 | 1.50E-04 | YP_001923243.1 | 0.02151  |
| NP_770725.1    | 0.32808  | YP_001239802.1 | 0.01163  | YP_577603.1    | 0.01372  |
| ZP_01047312.1  | 1.50E-04 | YP_318299.1    | 0.03645  | YP_001205339.1 | 0.04688  |
| YP_988814.1    | 0.181    | YP_002971617.1 | 0.01061  | YP_001609224.1 | 0.01393  |
| pdb3E60A       | 0        | YP_033372.1    | 0        | YP_032135.1    | 0.02996  |
| YP_001369133.1 | 0.02039  | NP_540390.1    | 0        | pdb3KZUA       | 0        |
| YP_001627145.1 | 0.00354  | NP_697489.1    | 1.40E-04 | ZP_05450760.1  | 0.00353  |
| ZP_05165638.1  | 0.00707  | ZP_05180446.1  | 0.01778  | YP_001258478.1 | 0.00354  |
| ZP_05462539.1  | 0.08957  | YP_468975.1    | 0.01591  | YP_002975036.1 | 0.00473  |
| YP_767164.1    | 1.50E-04 | YP_001977669.1 | 0.00513  | YP_002280579.1 | 1.50E-04 |
| YP_002825436.1 | 0.02503  | NP_385250.1    | 0.01084  | YP_001326438.1 | 0.02947  |
| ZP_02166210.1  | 0.12338  | YP_002543974.1 | 0.05724  | NP_354118.2    | 0.0475   |
| ZP_04679658.1  | 0.14316  | YP_002549100.1 | 0.08527  | YP_674325.1    | 0.10302  |
| NP_108086.1    | 0.00391  | ZP_05813138.1  | 0.00625  | YP_003064946.1 | 0.43804  |
| ZP_01437696.1  | 0.16578  | ZP_05086820.1  | 0.18417  | ZP_01227403.1  | 0.18804  |
| YP_003060318.1 | 0.28061  | YP_001684145.1 | 0.05805  | YP_003593381.1 | 0.03441  |
| NP_420488.1    | 0.03347  | ZP_06171018.1  | 0.09242  | ZP_05033285.1  | 0.19621  |
| YP_002130400.1 | 0.15685  | ZP_04770962.1  | 0.24083  | ZP_04759833.1  | 0.19148  |
| YP_001260599.1 | 0.09469  | YP_003545054.1 | 0.15116  | ZP_01303441.1  | 0.02267  |
| ZP_06862768.1  | 0.24424  | ZP_01039234.1  | 0.09707  | YP_496618.1    | 0.08762  |
| YP_457687.1    | 0.14062  | ZP_01865176.1  | 0.04421  | YP_615337.1    | 0.17287  |
| YP_001234655.1 | 0.13938  | YP_746029.1    | 0.20196  | YP_192434.1    | 0.19263  |
| ZP_06895049.1  | 0.14502  | YP_003187700.1 | 0.13943  | YP_002277749.1 | 0        |
| YP_001603174.1 | 0        | ZP_06833913.1  | 0.08213  | ZP_01018102.1  | 0.41767  |
| YP_003550965.1 | 0.36322  | ZP_02191471.1  | 0.16472  | YP_002297785.1 | 0.28153  |
| XP_002118651.1 | 0.31334  | YP_001499736.1 | 1.60E-04 | YP_002845626.1 | 0.00524  |
| YP_001495263.1 | 0        | NP_360823.1    | 0        | YP_247240.1    | 0.0053   |
| YP_001493932.1 | 0.01574  | ZP_04698465.1  | 0.05436  | ZP_06034564.1  | 0.07394  |
| YP_001492682.1 | 0.03941  | YP_001496807.1 | 0.0242   | YP_537284.1    | 0.00582  |
| YP_067689.1    | 0.05635  | NP_221116.1    | 0.02928  | YP_001248311.1 | 0.03576  |
| YP_001937729.1 | 0.02864  | YP_506338.1    | 0.03283  | YP_003081648.1 | 0.0081   |
| YP_180084.1    | 0        | YP_196139.1    | 0        | YP_302865.1    | 0.06478  |
| ZP_00544971.1  | 0.07239  | YP_198569.1    | 0.07279  | YP_001975519.1 | 0.32167  |
| CAL29454.1     | 0.11965  | NP_966906.1    | 0        | ZP_01314858.1  | 0        |

## KS3 Group 3G

|                |          |                |          |                |          |
|----------------|----------|----------------|----------|----------------|----------|
| ZP_03788216.1  | 0.01068  | ZP_00374013.1  | 0.00532  | YP_505503.1    | 0.37823  |
| YP_003328772.1 | 0.07751  | ZP_05277002.1  | 1.50E-04 | YP_153675.1    | 1.50E-04 |
| ZP_05277908.1  | 0.01188  | ZP_05117149.1  | 0.207    | ZP_01545048.1  | 0.08846  |
| ZP_05083800.1  | 0.40781  | YP_001116448.1 | 0.04719  | ZP_02888316.1  | 0.01683  |
| ZP_02905630.1  | 1.40E-04 | ZP_02186266.1  | 0.26731  | YP_986679.1    | 0.05985  |
| YP_003279171.1 | 0.03177  | ZP_03542755.1  | 0.05112  | ADI30431.1     | 0.34544  |
| ZP_06189504.1  | 0.01613  | ZP_06641007.1  | 0.07337  | YP_001477981.1 | 0.01565  |
| YP_001005869.1 | 1.60E-04 | ZP_04629915.1  | 0.0167   | ZP_04639397.1  | 0.01678  |
| ZP_04624336.1  | 1.40E-04 | YP_001401512.1 | 0.0569   | YP_001871983.1 | 0.00552  |
| ZP_02335673.1  | 0        | YP_001721366.1 | 0        | NP_670045.1    | 0        |
| YP_069980.1    | 0        | ZP_04636000.1  | 0.04044  | ZP_04633071.1  | 0.00609  |
| ZP_04611239.1  | 0.02246  | YP_001545138.1 | 0.22225  | ZP_06209461.1  | 0.11331  |
| XP_002339140.1 | 1.50E-04 | YP_001566690.1 | 0.00371  | YP_372676.1    | 0.11304  |
| ZP_03267203.1  | 0.0745   | ZP_02376504.1  | 0.19398  | YP_002763044.1 | 0.35714  |
| YP_001601372.1 | 0.08156  | YP_002275395.1 | 0.09885  | YP_001833651.1 | 0.18979  |
| ZP_03521437.1  | 0.05533  | YP_002281268.1 | 0.02344  | YP_002975762.1 | 0.0109   |
| YP_469631.1    | 0.02086  | YP_001978308.1 | 0.0157   | YP_002544532.1 | 0.10091  |
| YP_002823076.1 | 0.09975  | YP_002822705.1 | 0.03026  | YP_002541394.1 | 0.05304  |
| NP_356438.2    | 0.10928  | YP_002495122.1 | 0.21356  | NP_104074.1    | 0.11002  |
| ZP_05813399.1  | 0.10696  | YP_524379.1    | 0.30155  | YP_767999.1    | 0.14942  |
| NP_769169.1    | 0.23311  | YP_002289462.1 | 0.2001   | YP_002872684.1 | 0.17053  |
| YP_260538.1    | 0.0497   | ZP_04933060.1  | 0.00835  | YP_791866.1    | 0.00556  |
| YP_002441395.1 | 1.60E-04 | ZP_06879728.1  | 0.00556  | NP_250064.1    | 0        |
| ZP_01364736.1  | 0        | YP_001352609.1 | 0.11807  | YP_001352710.1 | 0.07061  |
| YP_002893188.1 | 0.15255  | YP_003005620.1 | 0.1016   | ZP_05726883.1  | 0.10392  |
| YP_002238424.1 | 0.01589  | YP_003439457.1 | 0.07353  | YP_002919547.1 | 0.00555  |
| YP_001335438.1 | 1.40E-04 | YP_003332985.1 | 0.04289  | NP_745446.2    | 0.13243  |
| AAN68910.1     | 1.60E-04 | YP_001267744.1 | 0.01714  | YP_051019.1    | 0.17168  |
| YP_349766.1    | 0.13959  | CAI36078.1     | 0.27618  | YP_574955.1    | 0.32254  |
| YP_001338909.1 | 0.14586  | ZP_01076878.1  | 0.17989  |                |          |

KS3 Group 3H

| Sequence       | Distance | Sequence       | Distance | Sequence       | Distance |
|----------------|----------|----------------|----------|----------------|----------|
| XP_001749342.1 | 0.63095  | XP_002178506.1 | 0.39885  | XP_002291090.1 | 0.84571  |
| CAL52563.1     | 0.19334  | XP_001416300.1 | 0.14086  | XP_002505334.1 | 0.43156  |
| EEH55341.1     | 0.17167  | XP_001016781.1 | 0.26312  | XP_001457159.1 | 0.54497  |
| XP_002674325.1 | 0.6943   | XP_001568067.1 | 0.07692  | XP_001468331.1 | 0.02104  |
| XP_001686034.1 | 0.04618  | CBH09473.1     | 1.50E-04 | XP_951607.1    | 0.03346  |
| XP_813530.1    | 0.01986  | XP_813186.1    | 0.04272  | XP_001898667.1 | 0.76763  |
| ADD38652.1     | 0.04538  | ADD24355.1     | 0.00893  | ADD18856.1     | 0.2195   |
| XP_001953046.1 | 0.03503  | NP_649565.1    | 0        | AAN71524.1     | 0        |
| AAL28297.1     | 1.40E-04 | XP_002038454.1 | 0.03255  | XP_002137354.1 | 0.04472  |
| XP_002013894.1 | 0.01745  | XP_002070764.1 | 0.03366  | XP_002056186.1 | 0.04898  |
| XP_001998915.1 | 0.02237  | XP_002102255.1 | 0.00853  | XP_002098053.1 | 0.02161  |
| XP_001978968.1 | 0.01782  | XP_001990179.1 | 0.08807  | XP_001947839.1 | 0.52627  |
| XP_002427048.1 | 0.34348  | XP_001604643.1 | 0.25134  | XP_397097.2    | 0.23716  |
| XP_312104.4    | 0.12011  | XP_001845950.1 | 0.17265  | XP_973516.1    | 0.3106   |
| XP_001654737.1 | 0.17414  | XP_001629352.1 | 0.50025  | XP_002110032.1 | 0.40464  |
| XP_001768881.1 | 0.1925   | NP_178533.2    | 0.09302  | AAD25826.1     | 0        |
| pdb1W0IA       | 0        | XP_002528950.1 | 0.05132  | XP_002302852.1 | 0.04679  |
| XP_002277197.1 | 0.1105   | EEE56501.1     | 0        | EEC72679.1     | 0        |
| ACN35500.1     | 0.01893  | NP_001141987.1 | 1.40E-04 | XP_002453478.1 | 0.11821  |
| EEY57732.1     | 0.44926  | EFA78466.1     | 0.23122  | XP_643787.1    | 0.31146  |
| XP_002160655.1 | 0.59816  | XP_002611606.1 | 0.32607  | XP_002131374.1 | 0.43139  |
| XP_001924257.1 | 0.35081  | DAA14416.1     | 0        | NP_001069092.1 | 0        |
| EFB16828.1     | 0.13428  | XP_002759712.1 | 0.08953  | XP_001091681.1 | 0.01635  |
| XP_001164637.1 | 0.00435  | XP_534240.1    | 0.09584  | XP_002716272.1 | 0.09388  |
| XP_001380871.1 | 0.14475  | AAI18052.1     | 0        | NP_081971.1    | 0        |
| XP_001493918.1 | 0.10203  | EDL20640.1     | 0.00843  | pdb2C9HA       | 1.40E-04 |
| NP_060367.1    | 0        | pdb2IWYA       | 0        | NP_001093978.1 | 0.32749  |
| XP_418755.2    | 0.06282  | XP_002195107.1 | 0.09075  | CAG11668.1     | 0.22185  |
| XP_693069.4    | 0.15647  | AAI39556.1     | 0.06115  | NP_001072543.1 | 0.39974  |
| XP_002412164.1 | 0.53625  | XP_002731411.1 | 0.39258  | XP_782586.2    | 0.09468  |
| XP_794160.2    | 1.70E-04 | XP_001203492.1 | 0.01585  | XP_795756.2    | 0.01932  |



KS3 Group 3I

| Sequence       | Distance | Sequence       | Distance | Sequence       | Distance |
|----------------|----------|----------------|----------|----------------|----------|
| XP_002493945.1 | 0.32608  | XP_452566.1    | 0.83912  | NP_984024.1    | 0.39613  |
| XP_002551645.1 | 0.23971  | XP_001644339.1 | 0.32248  | spP39525.1     | 0.32443  |
| EDN63035.1     | 0.03208  | EDZ72601.1     | 0.00628  | NP_010983.1    | 0.09356  |
| XP_002496001.1 | 0.36965  | XP_447833.1    | 0.39034  | XP_002618490.1 | 0.58331  |
| XP_457553.2    | 0.22806  | XP_001386421.2 | 0.22901  | XP_001526300.1 | 0.22255  |
| XP_002548234.1 | 0.17829  | XP_723188.1    | 1.60E-04 | EEQ44547.1     | 0.00512  |
| XP_002419413.1 | 0.02042  | XP_001486153.1 | 0.00662  | EDK37726.2     | 0.00634  |
| XP_506061.1    | 0.42153  | XP_002838530.1 | 0.26668  | XP_002621417.1 | 0.04597  |
| EEH49288.1     | 0.10083  | EEH22531.1     | 1.60E-04 | XP_002795522.1 | 0.00355  |
| EEH07635.1     | 1.40E-04 | XP_001537873.1 | 0.00387  | XP_001247018.1 | 1.50E-04 |
| EER24144.1     | 0.06508  | EFE29279.1     | 0.10123  | XP_002848012.1 | 0.07564  |
| XP_680758.1    | 0.09242  | XP_001215943.1 | 0.18786  | XP_749705.2    | 8.50E-04 |
| XP_001260198.1 | 0.00657  | XP_002478904.1 | 0.08358  | XP_002146596.1 | 0.12817  |
| XP_001275256.1 | 0.05883  | XP_002382186.1 | 0.13563  | EDP54227.1     | 0.02303  |
| XP_001400553.1 | 0.09429  | XP_002564915.1 | 0.24174  | XP_001908317.1 | 0.2199   |
| AAB81078.1     | 0.0766   | XP_955799.1    | 1.60E-04 | CBI51959.1     | 0.03974  |
| XP_365982.2    | 0.30076  | EEY22638.1     | 0.32117  | EEU46146.1     | 0.16274  |
| XP_387402.1    | 0.12842  | XP_001550504.1 | 0.01804  | XP_001590028.1 | 0.11964  |
| XP_001940043.1 | 0.37714  | NP_596487.1    | 0.354    | XP_002173178.1 | 0.35783  |
| XP_002639233.1 | 0.06764  | NP_001021098.1 | 0.01719  | NP_001021097.1 | 1.40E-04 |
| XP_002572381.1 | 1.17464  | ZP_01312503.1  | 0.57827  | YP_003395948.1 | 0.48109  |
| YP_220208.1    | 0.01581  | YP_515080.1    | 0.01037  | NP_829716.1    | 0.00511  |
| NP_296530.1    | 0.00979  | YP_001654230.1 | 0.0052   | YP_328598.1    | 0.00518  |
| YP_002888394.1 | 0        | NP_220289.1    | 0        | ACZ32804.1     | 0.00568  |
| NP_225111.1    | 0.00607  |                |          |                |          |

KS3 Group 3I

| Sequence       | Distance | Sequence       | Distance | Sequence       | Distance |
|----------------|----------|----------------|----------|----------------|----------|
| XP_002493945.1 | 0.32608  | XP_452566.1    | 0.83912  | NP_984024.1    | 0.39613  |
| XP_002551645.1 | 0.23971  | XP_001644339.1 | 0.32248  | spP39525.1     | 0.32443  |
| EDN63035.1     | 0.03208  | EDZ72601.1     | 0.00628  | NP_010983.1    | 0.09356  |
| XP_002496001.1 | 0.36965  | XP_447833.1    | 0.39034  | XP_002618490.1 | 0.58331  |
| XP_457553.2    | 0.22806  | XP_001386421.2 | 0.22901  | XP_001526300.1 | 0.22255  |
| XP_002548234.1 | 0.17829  | XP_723188.1    | 1.60E-04 | EEQ44547.1     | 0.00512  |
| XP_002419413.1 | 0.02042  | XP_001486153.1 | 0.00662  | EDK37726.2     | 0.00634  |
| XP_506061.1    | 0.42153  | XP_002838530.1 | 0.26668  | XP_002621417.1 | 0.04597  |
| EEH49288.1     | 0.10083  | EEH22531.1     | 1.60E-04 | XP_002795522.1 | 0.00355  |
| EEH07635.1     | 1.40E-04 | XP_001537873.1 | 0.00387  | XP_001247018.1 | 1.50E-04 |
| EER24144.1     | 0.06508  | EFE29279.1     | 0.10123  | XP_002848012.1 | 0.07564  |
| XP_680758.1    | 0.09242  | XP_001215943.1 | 0.18786  | XP_749705.2    | 8.50E-04 |
| XP_001260198.1 | 0.00657  | XP_002478904.1 | 0.08358  | XP_002146596.1 | 0.12817  |
| XP_001275256.1 | 0.05883  | XP_002382186.1 | 0.13563  | EDP54227.1     | 0.02303  |
| XP_001400553.1 | 0.09429  | XP_002564915.1 | 0.24174  | XP_001908317.1 | 0.2199   |
| AAB81078.1     | 0.0766   | XP_955799.1    | 1.60E-04 | CBI51959.1     | 0.03974  |
| XP_365982.2    | 0.30076  | EEY22638.1     | 0.32117  | EEU46146.1     | 0.16274  |
| XP_387402.1    | 0.12842  | XP_001550504.1 | 0.01804  | XP_001590028.1 | 0.11964  |
| XP_001940043.1 | 0.37714  | NP_596487.1    | 0.354    | XP_002173178.1 | 0.35783  |
| XP_002639233.1 | 0.06764  | NP_001021098.1 | 0.01719  | NP_001021097.1 | 1.40E-04 |
| XP_002572381.1 | 1.17464  | ZP_01312503.1  | 0.57827  | YP_003395948.1 | 0.48109  |
| YP_220208.1    | 0.01581  | YP_515080.1    | 0.01037  | NP_829716.1    | 0.00511  |
| NP_296530.1    | 0.00979  | YP_001654230.1 | 0.0052   | YP_328598.1    | 0.00518  |
| YP_002888394.1 | 0        | NP_220289.1    | 0        | ACZ32804.1     | 0.00568  |
| NP_225111.1    | 0.00607  |                |          |                |          |

KS3 Group 3J

| Sequence       | Distance | Sequence       | Distance | Sequence       | Distance |
|----------------|----------|----------------|----------|----------------|----------|
| XP_002509140.1 | 0.17327  | EEH54246.1     | 0.05952  | XP_002463312.1 | 0.3231   |
| CAL52269.1     | 0.10638  | XP_001416469.1 | 0.03303  | XP_002504288.1 | 0.26638  |
| EEH56019.1     | 0.09824  | ABR18442.1     | 0.15698  | spP23902.1     | 0.11326  |
| EAZ30871.1     | 0        | CAD40964.2     | 0        | NP_001052904.1 | 0        |
| BAH00228.1     | 0        | CAH67240.1     | 1.40E-04 | EAY94286.1     | 0.00363  |
| EAZ00014.1     | 0        | NP_001057053.1 | 0        | AAC49118.1     | 0.01064  |
| NP_199441.1    | 1.40E-04 | ABA07910.1     | 0.05287  | XP_002316735.1 | 0.01616  |
| XP_002305334.1 | 0.02151  | ABJ90468.1     | 0.02678  | XP_002519707.1 | 0.01569  |
| AAC04691.1     | 0.05964  | ABM53471.1     | 0.05021  | XP_002272874.1 | 0        |
| CAN70157.1     | 0        | CBI30851.1     | 0        | XP_001762048.1 | 1.50E-04 |
| XP_001776124.1 | 0.00701  | XP_001762687.1 | 0.17097  | NP_001152921.1 | 0.08248  |
| NP_001149639.1 | 0.01062  | NP_001146139.1 | 0.01085  | XP_002438009.1 | 0.01534  |
| AAF61730.1     | 0.00471  | AAF61731.1     | 1.60E-04 | ADE76842.1     | 0.1715   |
| AAK58535.1     | 0.26861  | ACU19800.1     | 0.11645  | AAC78479.1     | 0.20469  |
| XP_002265207.1 | 0        | CBI34509.1     | 0        | XP_002518849.1 | 0.0477   |
| XP_002299456.1 | 0.04152  | XP_002303661.1 | 0.01082  | XP_001768920.1 | 0.06238  |
| XP_001763306.1 | 0.02542  | XP_001773138.1 | 0.02216  | XP_001768994.1 | 0.10126  |
| ADE77460.1     | 0.10305  | XP_002272201.1 | 0        | CBI35831.1     | 0        |
| CAN69528.1     | 1.40E-04 | ACJ85772.1     | 0.07324  | XP_002326139.1 | 0.0945   |
| XP_002324139.1 | 0.03415  | ABJ90469.1     | 0.0549   | XP_002516228.1 | 0        |
| AAA33872.1     | 0        | AAW88762.1     | 0.00586  | AAF61737.1     | 0.02399  |
| AAW88763.1     | 1.40E-04 | CBI27767.1     | 0        | XP_002276214.1 | 0        |
| CAN81160.1     | 0.09405  | AAC04692.1     | 0.05227  | ABI18155.1     | 0.11349  |
| AAX54528.1     | 0.09212  | AAF91318.1     | 0.12607  | AAF61739.1     | 0.03114  |
| NP_565097.1    | 1.40E-04 | AAL91174.1     | 0.00576  | AAD55280.1     | 1.40E-04 |
| AAC68860.1     | 0.04141  | AAC68861.1     | 0.04413  | AAB37270.1     | 0.02636  |
| AAB37271.1     | 0.01449  | CAC59946.1     | 0.01454  | ACN85392.1     | 0.09235  |
| CAA84023.1     | 0.10424  | EEE59220.1     | 1.40E-04 | EEC75431.1     | 0.07594  |
| NP_001169617.1 | 0.03132  | EAZ42784.1     | 0        | NP_001060274.1 | 0        |
| EAZ04708.1     | 0        | NP_001132041.1 | 0        | ACG25173.1     | 0        |
| XP_002463181.1 | 1.40E-04 | CAA84022.1     | 0.01028  | ACQ41833.1     | 0.09991  |
| AAF26738.2     | 0.03084  | XP_001700152.1 | 0.22789  | CAL57571.1     | 0.18009  |
| XP_001421280.1 | 0.00284  | XP_001421246.1 | 1.40E-04 | XP_002505037.1 | 0.1425   |
| EEH55347.1     | 0.32112  |                |          |                |          |

KS3 Group 3K

| Sequence       | Distance | Sequence       | Distance | Sequence       | Distance |
|----------------|----------|----------------|----------|----------------|----------|
| YP_008237.1    | 0.23714  | ZP_06299044.1  | 0.23668  | YP_003251132.1 | 0.64945  |
| AAQ83492.1     | 0.01785  | YP_002722797.1 | 2.20E-04 | AAQ82571.1     | 0.00271  |
| YP_003634932.1 | 1.40E-04 | NP_787379.1    | 0.15981  | NP_789448.1    | 0.00662  |
| NP_931374.1    | 1.07375  | ZP_05733323.1  | 0.35421  | ZP_06291830.1  | 0.91235  |
| YP_002940685.1 | 0.41803  | YP_003251090.1 | 0.64415  | ZP_05622183.1  | 0.17253  |
| NP_970655.1    | 0.31837  | YP_002761147.1 | 0.45344  | ZP_03133348.1  | 0.40844  |
| ADD93463.1     | 0.24009  | ZP_03632613.1  | 0.25657  | YP_001877932.1 | 0.26479  |
| ZP_02928386.1  | 0.42196  | ZP_01909711.1  | 0.60175  | ZP_05135193.1  | 1.40E-04 |
| YP_002027262.1 | 0.01792  | YP_001970907.1 | 1.40E-04 | YP_001776182.1 | 0.03441  |
| NP_297963.1    | 0.00729  | NP_779695.1    | 0.01022  | ZP_00680880.1  | 0.00676  |
| ZP_00650790.1  | 1.40E-04 | YP_003375135.1 | 0.13935  | NP_636396.1    | 0.01587  |
| YP_362879.1    | 1.30E-04 | NP_641466.1    | 1.40E-04 | ZP_06731766.1  | 1.40E-04 |
| ZP_06706528.1  | 0.00339  | YP_001915487.1 | 0        | YP_199522.1    | 0        |
| ZP_02242174.1  | 0        | YP_449837.1    | 0        | ZP_06485693.1  | 0        |
| ZP_06490213.1  | 0        | YP_003460502.1 | 0.35848  | YP_002513901.1 | 0.14917  |
| EEZ80338.1     | 0.02788  | YP_903789.1    | 0.13792  | YP_001219364.1 | 0.19425  |
| ZP_01126078.1  | 0.44413  | YP_114431.1    | 0.21093  | YP_003528558.1 | 0.07458  |
| YP_343665.1    | 0.01189  | ZP_05047761.1  | 0.06729  | YP_001982157.1 | 0.17306  |
| YP_003073241.1 | 0.206    | YP_527105.1    | 0.29164  | ZP_05126462.1  | 0.07351  |
| XP_002171257.1 | 0.01651  | ZP_01102857.1  | 1.50E-04 | ZP_05096884.1  | 0.24075  |
| ZP_01625412.1  | 0.1838   | ZP_04958392.1  | 0.11833  | ZP_01618223.1  | 0.20934  |
| ZP_02062374.1  | 0.32148  | ZP_01306141.1  | 0.33882  | YP_927853.1    | 0.13456  |
| NP_718355.1    | 1.40E-04 | YP_738506.1    | 0.07419  | YP_963816.1    | 0.06528  |
| ZP_01707713.1  | 0.02917  | YP_750190.1    | 0.08892  | YP_001365924.1 | 0.00437  |
| YP_001050099.1 | 1.20E-04 | YP_870190.1    | 0.07212  | YP_734522.1    | 0.12876  |
| YP_003557290.1 | 0.07622  | YP_563294.1    | 0.14124  | YP_002312347.1 | 0.07662  |
| YP_001760423.1 | 0.03295  | YP_001474357.1 | 0.0538   | YP_001674003.1 | 0.02034  |
| YP_001502347.1 | 0.01491  | YP_001093731.1 | 0.14422  | ABO25839.1     | 0.08129  |
| ZP_02960982.2  | 0.06051  | ZP_06123439.2  | 0.06904  | ZP_03320935.1  | 0.03823  |
| ZP_05973686.2  | 0.01496  | NP_930065.1    | 0.10289  | YP_003468743.1 | 0.10786  |
| YP_003040542.1 | 0.07975  | YP_454742.1    | 0.16258  | ZP_04619570.1  | 0.03897  |
| ZP_04635494.1  | 1.50E-04 | ZP_04632899.1  | 0.00864  | ZP_04639480.1  | 0.00963  |
| ZP_04627784.1  | 0.01433  | NP_669077.1    | 0        | YP_001400557.1 | 0        |
| ACY62806.1     | 0        | YP_003568260.1 | 0        | ZP_02334966.1  | 0.01744  |
| ZP_04611172.1  | 1.50E-04 | YP_003018068.1 | 0.15153  | ZP_03830877.1  | 0.00926  |
| YP_003260166.1 | 1.50E-04 | YP_049899.1    | 0.01397  | ZP_03825337.1  | 0.01094  |
| ZP_06640849.1  | 0.03104  | YP_001907949.1 | 0.04366  | YP_003530834.1 | 0.07985  |
| ZP_04615742.1  | 0.09323  | ZP_05728387.1  | 0.04616  | YP_003210037.1 | 0.01487  |
| YP_001438334.1 | 0.02496  | YP_001176340.1 | 0.03006  | ZP_06550175.1  | 0        |
| YP_002239286.1 | 0        | YP_001334756.1 | 0.00498  | YP_003364749.1 | 0.00507  |
| ZP_06353351.2  | 0.02521  | ZP_04561508.1  | 0.01917  | ABX21687.1     | 0.01045  |
| YP_001570829.2 | 1.60E-04 | NP_460167.1    | 0.00988  | YP_002142377.1 | 0        |

KS3 Group 3K

|                |          |                |          |                |          |
|----------------|----------|----------------|----------|----------------|----------|
| YP_002114196.1 | 0        | YP_002638096.1 | 0        | ZP_03164106.1  | 0        |
| ZP_03364350.1  | 0        | ZP_03346304.1  | 0        | NP_455690.1    | 0        |
| YP_001453526.2 | 1.40E-04 | ABV13090.1     | 1.50E-04 | YP_002382969.1 | 0.02038  |
| ZP_02902779.1  | 0.03693  | YP_408386.1    | 0        | YP_001457939.1 | 0        |
| YP_001880735.1 | 0        | pdb2GFYA       | 0.00474  | pdb2GFVA       | 0.00457  |
| pdb3HNZA       | 1.50E-04 | YP_540234.1    | 0.00463  | pdb2GFWA       | 0        |
| pdb1B3NA       | 0        | YP_310075.1    | 0        | ABF03324.1     | 0        |
| YP_403641.1    | 0        | NP_287229.1    | 0        | CBK85300.1     | 0.01017  |
| YP_003613033.1 | 0.01313  | ZP_05967254.1  | 0.01801  | ZP_06189620.1  | 0.01391  |
| YP_001478139.1 | 0.00455  | YP_001005926.1 | 0.00595  | ZP_04623165.1  | 0.02322  |
| YP_003333159.1 | 0.10659  | YP_003003957.1 | 0.03663  | YP_002649150.1 | 0.07577  |
| CAY74690.1     | 0.08157  | YP_003519780.1 | 0.11591  | YP_002987210.1 | 0.06236  |
| YP_003296143.1 | 0.00713  | YP_002933773.1 | 0.01529  | ZP_06715161.1  | 0.09973  |
| ZP_03806049.1  | 0.16349  | ZP_03842102.1  | 0.08067  | YP_002150620.1 | 1.40E-04 |
| CBA72604.1     | 0.30127  | YP_002923351.1 | 0.32942  | ZP_06053854.1  | 0.16546  |
| ZP_01870109.1  | 0.10477  | YP_205121.1    | 0.10565  | ZP_05924106.1  | 0.04543  |
| ZP_01066867.1  | 0        | ZP_01954149.1  | 0        | NP_231653.1    | 1.60E-04 |
| ZP_01957459.1  | 0        | ZP_05885226.1  | 0.0696   | AAO11333.1     | 0.13062  |
| ZP_05891522.1  | 0.02062  | YP_002263607.1 | 0.22741  | ZP_01991511.1  | 0.00285  |
| spP55338.2     | 0.05087  | ZP_04923689.1  | 1.50E-04 | ZP_06181416.1  | 0.00267  |
| NP_798431.1    | 1.50E-04 | ZP_06176392.1  | 1.50E-04 | ZP_01988358.1  | 1.40E-04 |
| ZP_01262470.1  | 1.40E-04 | ZP_05945981.1  | 0.03215  | NP_934070.1    | 0.04149  |
| YP_001446086.1 | 1.40E-04 | ZP_01816115.1  | 0.05598  | ZP_05716250.1  | 0.01233  |
| ZP_05882061.1  | 0.02388  | ZP_04413434.1  | 0.00571  | ZP_01950453.1  | 1.40E-04 |
| ZP_04418352.1  | 0.00568  | ZP_06154962.1  | 0.06183  | ZP_01234892.1  | 0.04264  |
| ZP_04411348.1  | 0.00284  | ZP_01221254.1  | 0.06847  | YP_269019.1    | 0.29642  |
| YP_129410.1    | 0.01918  | BAA85258.1     | 0.08401  | ZP_01134231.1  | 0.19164  |
| ZP_01900212.1  | 0.14549  | ZP_01612356.1  | 0.08093  | YP_661692.1    | 0.07291  |
| YP_340321.1    | 0.04111  | YP_002126623.1 | 0.05226  | ZP_05620362.1  | 0.21158  |
| ZP_04717193.1  | 0.00937  | YP_001279117.1 | 0.21826  | YP_265253.1    | 0.03592  |
| YP_003627995.1 | 0.2101   | YP_003146377.1 | 0.28878  | ZP_04755718.1  | 0        |
| YP_581532.1    | 0.00955  | YP_001891409.1 | 0.00336  | AAW49905.1     | 0        |
| YP_001678073.1 | 0        | ZP_03666052.1  | 1.40E-04 | YP_513823.1    | 1.40E-04 |
| YP_170326.1    | 0        | ZP_01215082.1  | 0.131    | YP_002893375.1 | 0.11834  |
| YP_942529.1    | 0.16973  | YP_001141867.1 | 0.03136  | ZP_01946511.1  | 0.03968  |
| YP_856777.1    | 0.02227  | YP_095426.1    | 1.50E-04 | YP_126698.1    | 0.00512  |
| NP_819531.1    | 0.04789  | YP_123676.1    | 0        | ZP_05111858.1  | 0.0731   |
| YP_001250135.1 | 0        | ZP_06185391.1  | 0        | ZP_01114378.1  | 0.22156  |
| YP_003454957.1 | 0        | YP_001340991.1 | 0.10588  | YP_573655.1    | 0.27199  |
| ZP_01078567.1  | 0.1032   | ZP_01366433.1  | 0        | ZP_04934996.1  | 0        |
| ZP_01168464.1  | 0.23204  | YP_001347568.1 | 0.13138  | NP_251655.1    | 0.0148   |
| ZP_04929263.1  | 0        | ABP80270.1     | 0        | YP_001173112.2 | 0        |
| YP_001187126.1 | 0.02839  | NP_793603.1    | 1.40E-04 | ZP_03397918.1  | 0.00354  |

KS3 Group 3K

|                |          |                |          |                |          |
|----------------|----------|----------------|----------|----------------|----------|
| ZP_04588810.1  | 0.00716  | YP_273886.1    | 0.00352  | ZP_06480692.1  | 1.40E-04 |
| YP_234735.1    | 1.40E-04 | YP_001269106.2 | 0        | ABQ79922.1     | 0        |
| ZP_06457492.1  | 0.00351  | NP_744070.1    | 1.40E-04 | YP_607284.1    | 1.40E-04 |
| YP_001667733.1 | 0.00329  | YP_002874224.1 | 0.03354  | YP_258918.1    | 0.02247  |
| YP_001748401.1 | 0.01383  | YP_002798684.1 | 0.06208  | YP_959134.1    | 0.12348  |
| YP_349883.3    | 0.01946  | ZP_05293183.1  | 0.08217  | YP_002220014.1 | 0.20221  |
| ZP_01894498.1  | 0.14559  | YP_002794570.1 | 0.32735  | YP_411771.1    | 0.08038  |
| ZP_01914714.1  | 0.16338  | YP_746708.1    | 0.07349  | ZP_05313980.1  | 0.23494  |
| NP_841684.1    | 0.04435  | YP_160133.1    | 0.17575  | NP_881067.1    | 0.07215  |
| YP_003166784.1 | 0.17095  | YP_785646.1    | 0.0321   | YP_001630365.1 | 0.12193  |
| ZP_06686419.1  | 0.1213   | ZP_06734803.1  | 0.02855  | ZP_05319919.1  | 0.00831  |
| ZP_05984038.2  | 0.04441  | ZP_04757034.1  | 0.00646  | ZP_06864686.1  | 0.03421  |
| ZP_05977573.1  | 0.00419  | NP_273276.1    | 0.0409   | ZP_06568606.1  | 1.50E-04 |
| ZP_05982684.1  | 0.02083  | ZP_05987060.1  | 0.01089  | ZP_03718751.1  | 0.07713  |
| YP_208796.1    | 1.40E-04 | ZP_06754021.1  | 0.30917  | ZP_04603038.1  | 0.21952  |
| YP_974338.1    | 0.00712  | NP_903082.1    | 0.08441  | ZP_03699482.1  | 0.04666  |
| ZP_03714906.1  | 0.14996  | ZP_04578180.1  | 0.34408  | YP_002355959.1 | 0.32062  |
| ZP_04575983.1  | 0.08206  | ADI29722.1     | 0.10909  | YP_001353050.1 | 1.50E-04 |
| YP_545612.1    | 0.18068  | YP_002910839.1 | 0.0547   | YP_001896526.1 | 1.50E-04 |
| YP_001100338.1 | 0.10066  | ZP_06841075.1  | 0.00544  | YP_001857067.1 | 0.053    |
| YP_559922.1    | 1.40E-04 | ZP_06464841.1  | 1.50E-04 | ZP_06293389.1  | 1.40E-04 |
| ZP_02886558.1  | 0.01079  | ZP_02356453.1  | 0        | ZP_02464241.1  | 0.04011  |
| ZP_02363571.1  | 0        | ZP_03266076.1  | 0.0105   | YP_442256.1    | 1.40E-04 |
| YP_003605709.1 | 0.00545  | ZP_02472174.1  | 0        | YP_109030.1    | 0        |
| ZP_02374016.1  | 1.40E-04 | YP_001797301.1 | 0.0805   | YP_002980956.1 | 0.00682  |
| YP_001155186.1 | 0.11268  | ZP_03574381.1  | 0.00335  | YP_001580361.1 | 1.40E-04 |
| YP_001898501.1 | 0.01683  | YP_002230150.1 | 1.50E-04 | ZP_04939241.1  | 0.00359  |
| YP_368478.1    | 0.01339  | YP_001764382.1 | 0        | ZP_02891248.1  | 0.01083  |
| YP_620528.1    | 0        | YP_772894.1    | 0.00355  | YP_001118890.1 | 0.007    |
| YP_001807712.1 | 0.00355  | ZP_02379010.1  | 0.02004  | ZP_04946172.1  | 0.01191  |
| ZP_02908570.1  | 0.00874  | YP_002006069.1 | 0.00641  | YP_296468.1    | 0.00882  |
| YP_727016.1    | 0.0141   | ZP_00945474.1  | 0        | YP_002255620.1 | 0        |
| YP_584572.1    | 0.05925  | YP_001789647.1 | 0.21864  | CAZ89389.1     | 0.03546  |
| NP_519175.1    | 0.01424  | YP_001019837.1 | 0.13156  | YP_002943310.1 | 0.19874  |
| YP_003644067.1 | 0.17796  | YP_550447.1    | 0.11371  | ZP_03544801.1  | 0.00451  |
| YP_983290.1    | 0.04813  | YP_001566282.1 | 0.10796  | YP_997996.1    | 0.0757   |
| YP_003277016.1 | 1.40E-04 | YP_002554064.1 | 0        | YP_987475.1    | 0        |
| ZP_04761887.1  | 0.09519  | YP_969553.1    | 0.00972  | YP_522994.1    | 0.34856  |
| ZP_06209764.1  | 0.01329  | YP_003051156.1 | 0.083    | YP_003048574.1 | 0.12782  |
| XP_002162711.1 | 0.11181  | ZP_01552236.1  | 0.20235  | ZP_05081635.1  | 0.13269  |
| ZP_04830674.1  | 0.18964  | YP_315305.1    | 0.17037  | YP_933131.1    | 0.21731  |
| YP_285234.1    | 0.19861  | ZP_05103000.1  | 0.23451  | YP_390984.1    | 0.25836  |
| YP_003524155.1 | 0.34668  | ZP_05705509.1  | 0.1091   | YP_742258.1    | 0.26364  |

## KS3 Group 3K

|                |         |                |         |                |          |
|----------------|---------|----------------|---------|----------------|----------|
| YP_001210094.1 | 0.21714 | YP_003263791.1 | 0.28978 | YP_692791.1    | 0.02587  |
| YP_001001600.1 | 0.39782 | YP_003443845.1 | 0.30937 | ZP_05061779.1  | 0.44507  |
| ZP_05043240.1  | 0.02882 | YP_632930.1    | 0.10059 | ZP_01460729.1  | 0.4461   |
| ZP_01464368.1  | 0.10074 | ZP_01312314.1  | 0.17315 | YP_356856.1    | 0.16442  |
| YP_003270019.1 | 0.53621 | YP_002538067.1 | 0.06003 | YP_001230642.1 | 0.0216   |
| NP_952656.1    | 0.09439 | ZP_05309398.1  | 0.02306 | YP_002139902.1 | 1.50E-04 |
| YP_001952170.1 | 0.13803 | YP_901416.1    | 0.20761 | YP_384560.1    | 0.27189  |
| YP_003020977.1 | 0.0098  | CBA08104.1     | 0.62439 | ZP_03494621.1  | 0.97635  |

KS3 Group 3L

| Sequence       | Distance | Sequence       | Distance | Sequence       | Distance |
|----------------|----------|----------------|----------|----------------|----------|
| YP_002754850.1 | 0.48182  | YP_001819409.1 | 0.73185  | EES52670.1     | 0.37503  |
| EDZ40293.1     | 0.04129  | EAY56576.1     | 0.04133  | YP_003120062.1 | 0.4922   |
| ZP_03854179.1  | 0.29808  | YP_003124602.1 | 0.2515   | ZP_01718081.1  | 0.41248  |
| YP_003119859.1 | 0.34626  | ZP_01690302.1  | 0.43561  | ZP_01693246.1  | 0.60494  |
| YP_678196.1    | 0.32259  | YP_679453.1    | 0.24683  | YP_001196640.1 | 0.56519  |
| ZP_04781063.1  | 0.11274  | ZP_03966714.1  | 0.23333  | ZP_01886871.1  | 0.32363  |
| YP_003087233.1 | 0.23647  | YP_003091886.1 | 0.22737  | ZP_02424595.1  | 0.35709  |
| CBK63778.1     | 0.17495  | ZP_01720559.1  | 0.17479  | YP_003088284.1 | 0.22227  |
| YP_003389920.1 | 0.23661  | YP_001958264.1 | 0.41273  | ZP_03700728.1  | 0.18356  |
| YP_003194515.1 | 0.07891  | ZP_00949579.1  | 0.08904  | ZP_01890689.1  | 0.05128  |
| ZP_01049658.1  | 0.04215  | ZP_01062022.1  | 0.04434  | ZP_02161751.1  | 0.18265  |
| ZP_04057022.1  | 0.31784  | ZP_01252508.1  | 0.09217  | ZP_01053253.1  | 0.05382  |
| ZP_02181251.1  | 0.22134  | ZP_01105845.1  | 0.1172   | YP_863390.1    | 0.08906  |
| YP_003582835.1 | 0.07754  | ZP_01201455.1  | 0.13048  | ZP_01733616.1  | 0.10963  |
| YP_001295137.1 | 0.06635  | YP_001193490.1 | 0.06918  | ZP_01117143.1  | 0.11082  |
| YP_003096786.1 | 0.04992  | ZP_03851250.1  | 0.06164  | XP_001617649.1 | 0.22403  |
| ZP_03702479.1  | 0.1668   | YP_003141427.1 | 0.02823  | ZP_03391722.1  | 0.03542  |
| ZP_03968785.1  | 0.1205   | YP_003094446.1 | 0.06732  | ZP_01884445.1  | 0.12849  |
| YP_678008.1    | 0.29965  | ZP_01688991.1  | 0.12108  | NP_905866.1    | 0.15104  |
| ZP_04389105.1  | 0.25379  | ZP_04055530.1  | 0.13519  | YP_002308870.1 | 0.37564  |
| YP_001304162.1 | 0.02263  | ZP_02032793.1  | 0.00674  | ZP_03475111.1  | 0.00291  |
| ZP_01959937.1  | 0.01146  | ZP_04550949.1  | 1.40E-04 | ZP_02064985.1  | 0.00274  |
| ZP_05758919.1  | 0.00276  | ZP_02069579.1  | 0.00775  | ZP_02436222.1  | 0.02364  |
| ZP_03460597.1  | 0.02171  | ZP_03013826.1  | 0.00651  | ZP_03677269.1  | 0.01989  |
| CBK67700.1     | 0.04699  | ZP_05416579.1  | 0.02331  | ZP_04547219.1  | 1.60E-04 |
| NP_812270.1    | 0.03902  | YP_097502.1    | 0        | YP_209917.1    | 0        |
| ZP_05282327.1  | 0.04018  | ZP_05735745.2  | 0.31757  | YP_001298363.1 | 0.00669  |
| ZP_06743022.1  | 0        | ZP_03300403.1  | 0        | ZP_03207944.1  | 0.04903  |
| ZP_03011059.1  | 0.0648   | ZP_03643892.1  | 0.00618  | YP_003575810.1 | 0.17098  |
| ZP_06289954.1  | 0.11989  | ZP_06286096.1  | 0.10633  | ZP_04832643.1  | 0.06788  |
| ZP_05857440.1  | 0.06275  | ZP_06255608.1  | 0.03636  | ZP_06419836.1  | 0.05643  |
| ZP_06405966.1  | 0.23684  | ZP_06252653.1  | 0.06291  | ZP_06005333.2  | 0.12662  |
| ZP_06268087.1  | 0.09823  | ZP_05917246.1  | 0.10434  | YP_003543190.1 | 0.00587  |
| YP_001597844.1 | 0.05688  | YP_003257301.1 | 0.20752  | YP_003283722.1 | 0.05789  |
| YP_001996467.1 | 0.23377  | YP_002014879.1 | 0.18819  | YP_001958633.1 | 0.10135  |
| YP_001997755.1 | 0.17533  | NP_662992.1    | 0.11183  | YP_001942243.1 | 0.09671  |
| YP_379955.1    | 0.11033  | YP_912906.1    | 0.1145   | YP_374062.1    | 0.07278  |
| YP_001129721.1 | 0.05571  | YP_002017149.1 | 0.09734  | ZP_01386934.1  | 0.0985   |
| YP_446845.1    | 0.37127  | YP_003291950.1 | 0.17756  | YP_003572822.1 | 0        |
| YP_446831.1    | 0        | YP_003291812.1 | 0.24972  | YP_001568082.1 | 0.51597  |
| YP_001410126.1 | 0.32359  | YP_002535318.1 | 0.04857  | YP_001738169.1 | 0.01638  |
| NP_228611.1    | 0.00656  | YP_001243731.1 | 0.04926  | YP_001470058.1 | 0.24438  |



KS3 Group 3L

|                |          |                |          |                |          |
|----------------|----------|----------------|----------|----------------|----------|
| YP_002335564.1 | 0.20326  | YP_001306814.1 | 0.17977  | YP_074789.1    | 0.40417  |
| NP_968865.1    | 0.44175  | YP_001614453.1 | 0.41231  | YP_001379920.1 | 0.1776   |
| YP_465953.1    | 0.00701  | YP_002135191.1 | 1.40E-04 | YP_002493333.1 | 0.00697  |
| CAJ72131.1     | 0.38582  | ZP_02733622.1  | 0.37966  | YP_003631134.1 | 0.11445  |
| ZP_01852702.1  | 0.24903  | ZP_01094080.1  | 0.12076  | NP_867670.1    | 0.2986   |
| YP_003370125.1 | 0.1601   | YP_824804.1    | 0.31268  | YP_822446.1    | 0.34582  |
| YP_593580.1    | 0.29429  | YP_002432466.1 | 0.3677   | ZP_01288294.1  | 0.15723  |
| ADH85979.1     | 0.32407  | CBE68493.1     | 0.39388  | YP_001113412.1 | 0.26399  |
| YP_003640817.1 | 0.23547  | YP_003238945.1 | 0.2505   | YP_001740365.1 | 0.47761  |
| ZP_03496533.1  | 0.10119  | YP_143679.1    | 1.40E-04 | YP_004020.1    | 0.00424  |
| ADH64415.1     | 0        | ZP_04034165.1  | 0        | YP_003506462.1 | 0.23743  |
| ADI15897.1     | 0.34388  | YP_002785167.1 | 0.05864  | YP_603909.1    | 0.08364  |
| NP_295664.1    | 0.23062  | ZP_01088867.1  | 0.50816  | ZP_02735145.1  | 0.34445  |
| NP_863838.1    | 0.26622  | YP_003368802.1 | 0.43062  | ZP_01089313.1  | 0.27732  |
| YP_003630588.1 | 0.35539  | ZP_01857436.1  | 0.56034  | YP_066524.1    | 0.489    |
| YP_002247955.1 | 0.2175   | YP_460235.1    | 0.39115  | YP_845501.1    | 0.33544  |
| YP_002773104.1 | 0.26294  | ZP_02328762.1  | 0.14622  | ZP_04850828.1  | 0.14861  |
| YP_003244275.1 | 0.15179  | YP_003012208.1 | 0.22106  | XP_002290056.1 | 0.15037  |
| XP_002181453.1 | 0.16501  | XP_002370161.1 | 0.42095  | XP_724752.1    | 0.11494  |
| XP_675741.1    | 0.18997  | XP_001616272.1 | 0.09532  | XP_002261412.1 | 0.20643  |
| XP_966246.2    | 1.50E-04 | AAK83688.1     | 1.40E-04 | ZP_05056284.1  | 0.39502  |
| YP_001820662.1 | 0.23522  | ZP_03727666.1  | 0.31636  | YP_003548507.1 | 0.37181  |
| ZP_01876147.1  | 0.49148  | YP_003309245.1 | 0.21403  | ZP_06010976.1  | 0.17985  |
| ZP_05901369.1  | 0.13585  | YP_003164370.1 | 0.04838  | ZP_05617725.1  | 0.0078   |
| ZP_05626658.1  | 0.06414  | ZP_05551805.1  | 0.00396  | ZP_04571693.1  | 0.00628  |
| ZP_04573982.1  | 0.00517  | ZP_05815992.1  | 0.00323  | ZP_05440891.1  | 1.40E-04 |
| ZP_06870616.1  | 0.00339  | NP_603058.1    | 0.00339  | ZP_04969898.1  | 1.50E-04 |
| ZP_06027743.1  | 0.00332  | ZP_04571282.1  | 0.00679  | ZP_06747375.1  | 0.00336  |
| ZP_04568085.1  | 0.04492  | ZP_05632952.1  | 0.02206  | ZP_04859069.1  | 0.00907  |
| YP_003323087.1 | 0.45805  | YP_754517.1    | 0.39634  | ADI02208.1     | 0.22873  |
| YP_002508782.1 | 0.38451  | YP_003192929.1 | 0.60778  | YP_003495422.1 | 0.29073  |
| ZP_03293193.1  | 0.27685  | YP_001087677.1 | 0.018    | ZP_05400597.1  | 0.04977  |
| YP_360277.1    | 0.30021  | YP_003589302.1 | 0.19768  | YP_003184762.1 | 0.44581  |
| ZP_01665630.1  | 0.16709  | ZP_06560504.1  | 0.3291   | YP_003311665.1 | 0.00901  |
| ZP_04599935.1  | 0.01943  | ZP_03989355.1  | 0.16593  | YP_003399064.1 | 0.28537  |
| ZP_05893555.1  | 0.20734  | ZP_06603593.1  | 0.1112   | ZP_04658666.1  | 0.07755  |
| ZP_05897870.1  | 0.17405  | YP_001814532.1 | 0.27702  | YP_002887091.1 | 0.19039  |
| ZP_06364036.1  | 0.43846  | YP_003425376.1 | 0.23579  | ZP_06363737.1  | 0.13472  |
| ADH99049.1     | 0.25657  | YP_176042.1    | 0.13523  | NP_243748.1    | 0.09529  |
| NP_692126.1    | 0.23851  | ZP_04150226.1  | 0.0207   | ZP_04216550.1  | 0.01602  |
| YP_001374221.1 | 0.13634  | ZP_04196307.1  | 1.60E-04 | ZP_03238550.1  | 0        |
| ZP_04185048.1  | 0        | ZP_00239080.1  | 0        | YP_002444623.1 | 0        |
| ZP_04299489.1  | 0        | NP_830960.1    | 0        | ZP_04226742.1  | 1.40E-04 |

KS3 Group 3L

|                |          |                |          |                |         |
|----------------|----------|----------------|----------|----------------|---------|
| YP_001643960.1 | 0.00941  | ZP_04173469.1  | 0.00984  | ZP_04089390.1  | 0.00489 |
| ZP_04288233.1  | 0.0049   | NP_843662.1    | 1.40E-04 | NP_977615.1    | 0.00489 |
| YP_002560007.1 | 0.23064  | YP_301887.1    | 0.04177  | ZP_04059006.1  | 0.03832 |
| YP_253887.1    | 0.03119  | ZP_04824823.1  | 1.40E-04 | ZP_06613704.1  | 0       |
| NP_764233.1    | 0        | ZP_04818719.1  | 0.01732  | ZP_03612826.1  | 0.02842 |
| ZP_04677498.1  | 0.02959  | YP_003472096.1 | 0.08627  | YP_002633684.1 | 0.1117  |
| spQ5TKS0.1     | 1.50E-04 | CAQ49407.1     | 0.00552  | YP_493586.1    | 0.00553 |
| YP_416337.1    | 0.00546  | YP_040369.1    | 0        | NP_371508.1    | 0       |
| NP_645683.1    | 0        | pdb2GQDA       | 0        | ZP_06323997.1  | 0       |
| ZP_05686380.1  | 0.00551  | YP_003281866.1 | 0.00552  | ZP_04016882.1  | 0.00556 |
| YP_001696952.1 | 0.22235  | ZP_04443603.1  | 0.09126  | NP_471636.1    | 0.0073  |
| YP_003465414.1 | 0.01707  | ZP_00233381.1  | 0.00341  | NP_465725.1    | 0       |
| ZP_05297623.1  | 0        | ZP_05236017.1  | 0        | ZP_00231477.1  | 0       |
| YP_014824.1    | 0        | YP_002349315.1 | 0.00683  | YP_850415.1    | 0.00158 |
| ZP_03225734.1  | 0.21132  | YP_003561164.1 | 0.13185  | ZP_01862222.1  | 0.12104 |
| YP_001124810.1 | 1.40E-04 | ZP_03146733.1  | 0.00343  | YP_146658.1    | 0.00341 |
| ZP_04392453.1  | 1.40E-04 | YP_002948902.1 | 0.02512  | ZP_05371367.1  | 0.03056 |
| YP_002316483.1 | 0.13554  | ZP_04430457.1  | 0.07627  | ZP_01170974.1  | 0.09691 |
| YP_078422.1    | 0.0504   | YP_001486302.1 | 0        | ZP_03053250.1  | 0       |
| YP_001420729.1 | 0.0219   | ZP_06875016.1  | 0.00718  | BAI84686.1     | 0.00351 |
| NP_389016.1    | 1.50E-04 | ZP_06402851.1  | 0.50936  | ZP_01452101.1  | 0.26996 |
| YP_865786.1    | 0.43274  | YP_001180390.1 | 0.06617  | YP_002573032.1 | 0.09063 |
| YP_001037359.1 | 0.25729  | ZP_05495182.1  | 0.32835  | YP_001311055.1 | 0.28255 |
| YP_002505046.1 | 0.12564  | ZP_05497506.1  | 0.09822  | ZP_05336897.1  | 0.19878 |
| NP_623088.1    | 0.05831  | YP_003477102.1 | 0.03499  | ADH61042.1     | 0.0345  |
| YP_001665275.1 | 0.00561  | YP_001663343.1 | 0.00915  | YP_429809.1    | 0.45682 |
| YP_002460266.1 | 0.00834  | YP_518890.1    | 0.02377  | AAN87389.1     | 0.14965 |
| YP_001680735.1 | 0.14122  | YP_001320563.1 | 0.22111  | YP_001512997.1 | 0.3072  |
| YP_001917533.1 | 0.51278  | YP_002250662.1 | 0.08717  | YP_002352840.1 | 0.04572 |
| ZP_03734380.1  | 0.32918  | YP_001716810.1 | 0.33827  | YP_001212289.1 | 0.18229 |
| YP_003190690.1 | 0.19383  | YP_002730299.1 | 0.11875  | YP_002728053.1 | 0.05301 |
| YP_001931825.1 | 0.0144   | ZP_04584081.1  | 0.01117  | ZP_06462719.1  | 0.02908 |
| YP_002121176.1 | 0.15055  | YP_003431914.1 | 0.18789  | ZP_02178615.1  | 0.17448 |
| NP_214178.1    | 0.11367  | YP_003472861.1 | 0.12048  | YP_001939086.1 | 0.49937 |
| ZP_06243415.1  | 0.45866  | YP_003505719.1 | 0.6722   | YP_001544358.1 | 0.4679  |
| ACD50086.1     | 0.58316  | ADD96099.1     | 0.61058  | YP_003102529.1 | 0.65007 |
| NP_149252.1    | 0.37443  | YP_001698468.1 | 0.11936  | ZP_01725299.1  | 0.08481 |
| YP_003307114.1 | 0.37539  | ZP_04443032.1  | 0.60049  | YP_002773860.1 | 0.19727 |
| YP_003013657.1 | 0.27316  | ZP_02326180.1  | 0.13931  | YP_001420224.1 | 0.16229 |
| ZP_03056304.1  | 0.18045  | YP_003565924.1 | 0.1021   | ZP_04118205.1  | 0.06667 |
| ZP_04155019.1  | 0.00774  | ZP_04215528.1  | 0.02214  | ZP_04850785.1  | 0.35604 |
| YP_003240556.1 | 0.34133  | YP_003142531.1 | 0.42494  | ZP_04454323.1  | 0.30557 |
| CBL14611.1     | 0.34428  | ZP_02081245.1  | 0.28038  | ZP_01772088.1  | 0.61768 |

KS3 Group 3L

|                |          |                |          |                |          |
|----------------|----------|----------------|----------|----------------|----------|
| YP_003553909.1 | 0.18485  | ZP_06393391.1  | 0.18277  | ZP_06440084.1  | 0.26481  |
| ZP_06265931.1  | 0.51376  | ZP_05860123.1  | 0.31081  | CBL28034.1     | 0.31231  |
| YP_003317609.1 | 0.40074  | ZP_02443330.1  | 0.44681  | ZP_06470467.1  | 0.61591  |
| ZP_03706016.1  | 0.37023  | CBL35373.1     | 0.02235  | ZP_02422789.1  | 0.03236  |
| ZP_06720340.1  | 0.25128  | CBL18348.1     | 0.33737  | ZP_06142888.1  | 0.30048  |
| ZP_03461733.1  | 0.27619  | ZP_02027437.1  | 0.17438  | ZP_03800905.1  | 0.0923   |
| CBK81085.1     | 0.1383   | ZP_03717142.1  | 0.28489  | ZP_03168830.1  | 0.17189  |
| CBL25725.1     | 0.13051  | ZP_03289010.1  | 0.16217  | ZP_02234907.1  | 0.14661  |
| ZP_01994132.1  | 0.11187  | ZP_01968409.1  | 0.22562  | ZP_03778474.1  | 0.15051  |
| ZP_02432065.1  | 0.11185  | ZP_02040885.1  | 0.23189  | ZP_01966099.1  | 0.02305  |
| CBL21722.1     | 0.03157  | ZP_03757156.1  | 0.11304  | CBL19670.1     | 0.19972  |
| ZP_05854014.1  | 0.23974  | CBK89806.1     | 0.03496  | YP_002939005.1 | 0.02674  |
| ZP_06113826.1  | 0.13825  | ZP_06346758.1  | 0.06684  | CBK76059.1     | 0.00905  |
| CBL41680.1     | 0.21358  | ZP_02084300.1  | 0.14533  | ZP_04666129.1  | 0.17052  |
| ZP_02074863.1  | 0.24496  | ZP_02206009.1  | 0.00592  | CBK83617.1     | 0.15997  |
| ZP_05344250.3  | 0.36855  | ZP_04855818.1  | 0.19579  | ZP_03782418.1  | 0.21903  |
| YP_001557644.1 | 0.2891   | ZP_02439874.1  | 0.18814  | ZP_02420537.1  | 0.17185  |
| ZP_03752404.1  | 0.21816  | ZP_04742022.2  | 0.00572  | CBL14355.1     | 1.40E-04 |
| ZP_02074248.1  | 0.23164  | ZP_02206151.1  | 0.02747  | CBK83510.1     | 0.0652   |
| ZP_05131827.1  | 0.40124  | ZP_06425403.1  | 0.71535  | ZP_02211332.1  | 0.333    |
| ZP_04805320.1  | 0.1549   | YP_698461.1    | 0.00977  | ZP_02863451.1  | 1.50E-04 |
| ZP_02640906.1  | 0        | ZP_02634002.1  | 0        | ZP_02953976.1  | 0        |
| NP_561987.1    | 0        | YP_695773.1    | 0.0048   | ZP_02643084.1  | 0.08879  |
| YP_001885349.1 | 0.11038  | ZP_04823881.1  | 1.40E-04 | YP_001920479.1 | 0.00334  |
| YP_001308212.1 | 0.17723  | ZP_02950240.1  | 0.19006  | YP_001393525.1 | 0        |
| YP_002470548.1 | 0        | NP_780846.1    | 0.21448  | ZP_05390941.1  | 0.27824  |
| ZP_02993889.1  | 9.70E-04 | YP_001256078.1 | 0.00557  | YP_001788942.1 | 0.00497  |
| ZP_02618342.1  | 0.03065  | YP_001783235.1 | 0.01496  | YP_001385911.1 | 0.00491  |
| YP_001392954.1 | 1.50E-04 | NP_350156.1    | 0.28995  | ZP_04862000.1  | 0.22756  |
| YP_877023.1    | 0.06905  | ZP_02621963.1  | 0.03717  | ZP_06884906.1  | 0.41416  |
| ZP_02693053.1  | 0.33465  | ZP_02868300.1  | 0.15356  | ZP_02429443.1  | 0.24549  |
| ZP_06620909.1  | 0.39472  | ZP_06573121.1  | 0.50023  | ZP_05792797.2  | 0.35239  |
| CBK73670.1     | 0.30005  | ZP_06597646.1  | 0.29256  | ZP_03990115.1  | 0.12821  |
| ZP_02038717.1  | 0.27672  | ZP_05980407.2  | 0.19604  | ZP_02092112.1  | 0.00511  |
| CBL01769.1     | 1.50E-04 | CBK99468.1     | 0.16852  | ZP_05616243.1  | 0.0578   |
| ZP_02094140.1  | 0.38953  | ZP_02862884.1  | 0.20791  | CBK87922.1     | 0.14832  |
| ZP_06646270.1  | 0.24268  | YP_002931157.1 | 0.28743  | ZP_04453512.1  | 0.38644  |
| ZP_03681418.1  | 0.44347  | YP_001620459.1 | 0.72643  | ZP_04449887.1  | 0.4033   |
| ZP_06808099.1  | 0.32943  | ZP_05577785.1  | 1.40E-04 | ZP_04646521.1  | 0        |
| NP_814075.1    | 0        | ZP_04436497.1  | 0.0028   | ZP_05421483.1  | 0.00281  |
| ZP_05575115.1  | 1.40E-04 | ZP_02185651.1  | 0.31758  | ZP_05737017.1  | 0.19403  |
| ZP_05851434.1  | 0.37409  | ZP_05648820.1  | 0.06375  | ZP_05645534.1  | 0.05094  |
| ZP_05655161.1  | 0.01646  | ZP_05575928.1  | 1.60E-04 | ZP_05565104.1  | 0.00558  |

KS3 Group 3L

|                |          |                |          |                |          |
|----------------|----------|----------------|----------|----------------|----------|
| ZP_04433522.1  | 1.40E-04 | ZP_05574350.1  | 0        | NP_816500.1    | 0        |
| ZP_05473522.1  | 1.40E-04 | CBL32387.1     | 0.00371  | ZP_05568099.1  | 0.0037   |
| ZP_04437737.1  | 0.00373  | ZP_03949445.1  | 0.00369  | ZP_05425365.1  | 1.40E-04 |
| ZP_00603595.1  | 0.02103  | ZP_05664931.1  | 0.00589  | ZP_03980617.1  | 1.50E-04 |
| ZP_05673272.1  | 0.05174  | ZP_05678623.1  | 0.01756  | ZP_05668246.1  | 1.60E-04 |
| YP_001033056.1 | 0.12624  | YP_808800.1    | 1.60E-04 | NP_266931.1    | 0.05851  |
| YP_819918.1    | 0.26477  | ZP_06901134.1  | 0.06293  | ZP_02919319.1  | 0.00472  |
| YP_003429778.1 | 0.00502  | ZP_04062531.1  | 0.01443  | YP_138921.1    | 0.01183  |
| NP_722066.1    | 0.09227  | YP_002739785.1 | 0.00225  | ZP_01828393.1  | 0.01188  |
| ZP_06611561.1  | 0.21887  | YP_001450969.1 | 0.08997  | ZP_06199525.1  | 0.06596  |
| ZP_01823334.1  | 1.40E-04 | pdb2RJTA       | 0.00854  | pdb2ALMA       | 0.00284  |
| YP_003446781.1 | 0.05233  | NP_357976.1    | 0        | pdb1OX0A       | 0        |
| NP_344945.1    | 0        | YP_001035860.1 | 0.113    | ZP_00787798.1  | 0.18271  |
| NP_687383.1    | 0.03844  | ZP_00790586.1  | 0.01162  | ZP_00785927.1  | 1.60E-04 |
| YP_002997513.1 | 0.02678  | YP_603042.1    | 0.00584  | YP_601113.1    | 0.00583  |
| NP_665326.1    | 0.00584  | YP_002562783.1 | 0.13132  | YP_002122798.1 | 0.00568  |
| YP_002745082.1 | 0.00579  | YP_002745862.1 | 0.00291  | YP_060801.1    | 0        |
| YP_597222.1    | 0        | NP_269771.1    | 0        | ZP_03625942.1  | 0.13865  |
| YP_001199168.1 | 0.13013  | ZP_04783778.1  | 0.23939  | ZP_03913260.1  | 0.00311  |
| YP_817812.1    | 0.12391  | YP_003621567.1 | 0.04672  | YP_001727583.1 | 0.01612  |
| ZP_03959921.1  | 0.1971   | ZP_05744651.1  | 0.13715  | ZP_04008326.1  | 0.14277  |
| YP_535348.1    | 0.01855  | ZP_06817776.1  | 0.09318  | ZP_04010559.1  | 0.0674   |
| ZP_01543875.1  | 0.09848  | YP_811105.1    | 0.04986  | YP_807306.1    | 0        |
| YP_001988220.1 | 0        | ZP_03963925.1  | 0        | YP_003174801.1 | 0.07175  |
| ZP_04441810.1  | 1.60E-04 | YP_003171861.1 | 0        | ZP_03210896.1  | 0        |
| YP_001271585.1 | 0.06867  | ZP_03974569.1  | 1.40E-04 | ABO43826.1     | 0.00322  |
| ZP_03956643.1  | 0.2564   | ZP_06627954.1  | 0.12684  | YP_618933.1    | 0.03862  |
| YP_812866.1    | 0.04079  | YP_001843130.1 | 0.14923  | YP_804360.1    | 0.16777  |
| ZP_06196566.1  | 0.11828  | ZP_05752285.1  | 0.125    | ZP_03953103.1  | 0.00617  |
| ZP_03942975.1  | 0.00309  | ZP_03940041.1  | 1.40E-04 | ZP_04012975.1  | 0.02628  |
| NP_785257.1    | 0        | YP_003062992.1 | 0        | YP_795097.1    | 0.17994  |
| YP_395430.1    | 0.42357  | ZP_06813000.1  | 0.33566  | YP_003330292.1 | 0.04036  |
| YP_181686.1    | 0.01468  | YP_001214314.1 | 1.40E-04 | YP_307969.1    | 0.0026   |
| ZP_03736214.1  | 0.25944  | YP_003156611.1 | 0.35411  | YP_594537.1    | 0.45532  |
| ZP_03310327.1  | 0.25675  | YP_002480193.1 | 0.24938  | YP_010423.1    | 0.25175  |
| YP_388923.1    | 0.36091  | YP_002437503.1 | 0.09467  | ZP_06368570.1  | 0.06559  |
| YP_002955375.1 | 0.07478  | YP_003198282.1 | 0.26619  | ZP_06233098.1  | 0.25606  |
| YP_002990263.1 | 0.18914  | ZP_01871119.1  | 0.26096  | YP_002606717.1 | 0.12957  |
| ZP_05626599.1  | 0.29342  | ZP_00370611.1  | 0.09782  | YP_002574900.1 | 0.09257  |
| ZP_00367709.1  | 0.09379  | YP_001398517.1 | 0.01586  | ZP_06371788.1  | 0.03708  |
| YP_001481993.1 | 1.60E-04 | ZP_06373356.1  | 0.02116  | ZP_01069885.1  | 0.03814  |
| YP_178513.1    | 0.00384  | ZP_01067458.1  | 0.00382  | ZP_03222093.1  | 0.00386  |
| YP_001405835.1 | 0.38114  | YP_001359462.1 | 0.13768  | YP_003304885.1 | 0.24817  |

KS3 Group 3L

|                |          |                |          |                |         |
|----------------|----------|----------------|----------|----------------|---------|
| ZP_05071700.1  | 0.06196  | ZP_03609170.1  | 0.04129  | ZP_05363941.1  | 0.0243  |
| YP_001467394.1 | 0.13681  | YP_892506.1    | 1.60E-04 | ZP_06009774.1  | 0.00343 |
| YP_001490943.1 | 0.25149  | YP_003654666.1 | 0.16236  | ZP_04581790.1  | 0.25636 |
| YP_001355786.1 | 0.24138  | ZP_04583245.1  | 0.15543  | ZP_03656759.1  | 0.01974 |
| ZP_04808751.1  | 0.02131  | NP_906860.1    | 0.27626  | NP_860258.1    | 0.07419 |
| ZP_03659023.1  | 0.1097   | YP_002266145.1 | 0.00471  | NP_207353.1    | 0.01057 |
| ZP_03240344.1  | 1.50E-04 | ZP_03437884.1  | 0.01071  | YP_664568.1    | 0.01088 |
| ZP_03438933.1  | 0.00532  | NP_223223.1    | 0.00533  | YP_001910282.1 | 0.00542 |
| YP_003057554.1 | 0.01641  | YP_002301199.1 | 0        | ACX97966.1     | 0       |
| YP_627277.1    | 0        | ACX99377.1     | 0        | YP_003516548.1 | 0.32976 |
| YP_002522025.1 | 0.32397  | YP_003319468.1 | 0.36454  | YP_001430529.1 | 0.02299 |
| YP_001278884.1 | 0.03675  | YP_001634736.1 | 0.10811  | YP_002463050.1 | 0.02899 |
| YP_003321759.1 | 0.43262  | YP_001431604.1 | 0.02811  | YP_001277776.1 | 0.02519 |
| ZP_02733103.1  | 0.81912  | ZP_03999524.1  | 0.33114  | YP_003405633.1 | 0.23749 |
| YP_643859.1    | 0.8212   | ZP_01084812.1  | 0.12725  | YP_002049115.1 | 0.46021 |
| ZP_05046053.1  | 0.22362  | NP_895781.1    | 0.04036  | ZP_01079056.1  | 0.08476 |
| ZP_01471680.1  | 0.02842  | YP_001223919.1 | 0.07973  | NP_896237.1    | 0.07258 |
| YP_376187.1    | 0.03757  | ZP_01468915.1  | 0.0859   | YP_001226387.1 | 0.19716 |
| YP_380456.1    | 0.00947  | ZP_05789772.1  | 0.00846  | ZP_01123709.1  | 0.09522 |
| YP_729368.1    | 0.08392  | YP_001012111.1 | 0.05537  | NP_893726.1    | 0.04746 |
| YP_398199.1    | 0.03239  | ZP_05139231.1  | 0        | YP_001485082.1 | 0       |
| YP_001010209.1 | 0.01739  | YP_001092026.1 | 0.0115   | YP_001551619.1 | 0.12442 |
| NP_876160.1    | 0.11366  | YP_001015881.1 | 0        | YP_292379.1    | 0       |
| YP_003422222.1 | 0.21629  | YP_001865633.1 | 0.64641  | ZP_00513550.1  | 0.17606 |
| YP_720383.1    | 0.14833  | YP_001519795.1 | 0.16184  | NP_926960.1    | 0.24433 |
| NP_924037.1    | 0.4959   | YP_477888.1    | 0.02     | YP_476236.1    | 0.18332 |
| ZP_03765743.1  | 0.05252  | ZP_06309122.1  | 0.03263  | ZP_06303619.1  | 0.04544 |
| ZP_06382633.1  | 0.00629  | ZP_03272565.1  | 0.01162  | YP_001867862.1 | 0.08024 |
| NP_487383.1    | 0.07626  | ZP_05027018.1  | 0.11311  | ZP_03157928.1  | 0.05402 |
| YP_002379307.1 | 0.14342  | YP_001656510.1 | 0.01304  | CAO88532.1     | 0.00406 |
| YP_001734282.1 | 0.08139  | ZP_05035171.1  | 0.24695  | YP_003321759.1 | 0.10562 |
| NP_440631.1    | 0.17718  | ZP_01728449.1  | 0.02694  | YP_001805532.1 | 0.07568 |
| YP_324147.1    | 0.07804  | ZP_01631702.1  | 0.05799  | YP_171694.1    | 0.23655 |
| ZP_01619715.1  | 0.0929   | YP_002485176.1 | 0.16519  | NP_682661.1    | 0.14745 |
| ACZ01947.1     | 0.2071   | ACA34361.1     | 0.03737  | YP_002246621.1 | 0.62326 |
| YP_001956544.1 | 0.53835  | YP_002521773.1 | 0.18831  | YP_003318903.1 | 0.24769 |
| YP_001434322.1 | 0.05594  | YP_001277895.1 | 0.02244  | YP_002463893.1 | 0.07475 |
| YP_001635535.1 | 0.13303  | YP_001275116.1 | 0.12249  | YP_001434466.1 | 0.32788 |
| YP_002523729.1 | 0.11349  | YP_003320888.1 | 0.1176   | YP_872957.1    | 0.31202 |
| ZP_04994112.1  | 0.02004  | ZP_05485955.1  | 0.01029  | YP_003454004.1 | 0.26381 |
| ZP_05108662.1  | 0.16098  | YP_125768.1    | 1.50E-04 | YP_094405.1    | 0.00367 |
| YP_122766.1    | 1.40E-04 | YP_001252230.1 | 0.00366  | NP_929475.1    | 0.53443 |
| ZP_06125279.1  | 0.21751  | YP_001908923.1 | 0.19784  | YP_003610898.1 | 0.11231 |

KS3 Group 3L

|                |          |                |          |                |          |
|----------------|----------|----------------|----------|----------------|----------|
| YP_003366969.1 | 0.21291  | ZP_04630637.1  | 0.17362  | ZP_04622655.1  | 0.0264   |
| YP_001005136.1 | 0.00958  | ZP_04640613.1  | 0.07132  | ZP_04619405.1  | 0.15769  |
| ZP_04628154.1  | 0.00819  | ZP_04634945.1  | 0.02032  | NP_901211.1    | 0.31062  |
| AAT90821.1     | 0.36314  | NP_931838.1    | 0.05326  | YP_003042985.1 | 0.01788  |
| ADI05721.1     | 0.4903   | ZP_05508642.1  | 0.63743  | ZP_06473130.1  | 0.60316  |
| ADI05723.1     | 0.18525  | ZP_06473132.1  | 0.15734  | ZP_05508640.1  | 0.31386  |
| ABA18623.1     | 0.15942  | YP_001268287.1 | 1.40E-04 | NP_744924.1    | 0.00579  |
| ABW82985.1     | 0.23424  | YP_001702766.1 | 0.58166  | YP_003109695.1 | 0.80865  |
| ZP_05487905.1  | 0.5403   | AAQ94254.1     | 0.02044  | YP_001106327.1 | 1.40E-04 |
| YP_003383869.1 | 0.17043  | ZP_06215420.1  | 1.40E-04 | ZP_06400214.1  | 0.01879  |
| YP_001537502.1 | 0.08911  | YP_001159315.1 | 0.01992  | YP_003114003.1 | 0.46538  |
| ZP_06396614.1  | 0.00362  | ZP_06216175.1  | 1.40E-04 | YP_003337503.1 | 0.64837  |
| NP_625553.1    | 0.0038   | NP_630007.1    | 1.50E-04 | ZP_05523120.1  | 0.00531  |
| ZP_04711553.1  | 0.16547  | ZP_04696369.1  | 0.05592  | CAJ87985.1     | 0.3674   |
| YP_001828148.1 | 0.34745  | YP_001828151.1 | 0        | ZP_06276851.1  | 0        |
| ZP_05510151.1  | 0.52254  | ZP_05525553.1  | 1.50E-04 | NP_627460.1    | 0.00349  |
| NP_925466.1    | 1.0102   | ZP_06275604.1  | 0.37975  | ZP_04683649.1  | 1.40E-04 |
| ZP_06574398.1  | 1.40E-04 | NP_823468.1    | 0.12183  | YP_001510010.1 | 0.21853  |
| ADI05069.1     | 0.14526  | YP_481193.1    | 0.37598  | ZP_05519951.1  | 0.33327  |
| ZP_04697189.1  | 0.03402  | YP_001822856.1 | 0.0566   | ZP_05805182.1  | 0.22387  |
| ZP_06273894.1  | 0.16264  | ZP_06775747.1  | 0.59226  | YP_002872771.1 | 0.52329  |
| YP_001107649.1 | 0.27776  | YP_644158.1    | 0.66901  | YP_003410476.1 | 0.42931  |
| YP_003513545.1 | 0.30554  | YP_001160192.1 | 0.04825  | YP_001538412.1 | 0.04718  |
| ZP_06218767.1  | 0.01989  | ZP_06401238.1  | 0.01351  | ZP_04605143.1  | 0.08634  |
| ZP_04334936.1  | 0.33248  | YP_003380433.1 | 0.36318  | CBL56467.1     | 0.3162   |
| ZP_06263411.1  | 0.03121  | YP_055692.1    | 0.04995  | YP_001363074.1 | 0.34108  |
| YP_923184.1    | 0.38815  | YP_003117494.1 | 0.27967  | NP_626636.1    | 0        |
| ZP_05526420.1  | 0        | ZP_05020752.1  | 0.04456  | ZP_06707711.1  | 0.02527  |
| ZP_05541465.1  | 0.02501  | ZP_05531190.1  | 0.0254   | ZP_04688462.1  | 0.01231  |
| NP_826962.1    | 0.02472  | AAA99449.1     | 0.03733  | YP_003491959.1 | 0.06878  |
| CAP09196.1     | 0.17014  | ZP_05518129.1  | 0.07645  | ADI10571.1     | 0.0649   |
| ZP_05486602.1  | 0.02613  | ZP_04991293.1  | 0.02771  | ZP_04998216.1  | 0.08209  |
| ZP_05506387.1  | 0.03823  | YP_001826617.1 | 0.00667  | ZP_04692874.1  | 0.01132  |
| ZP_06771104.1  | 0.05483  | ZP_05004314.1  | 1.50E-04 | ZP_05014614.1  | 0.06268  |
| ZP_04701784.1  | 0.08487  | ZP_06270805.1  | 0.02653  | ZP_05802441.1  | 0.02459  |
| ZP_06281367.1  | 0.00615  | CAJ88318.1     | 0.43644  | ZP_03926575.1  | 0.61659  |
| ZP_06241187.1  | 0.29106  | ZP_06410760.1  | 0.14775  | YP_481038.1    | 0.16846  |
| ZP_06475441.1  | 0.21823  | YP_715825.1    | 0.0562   | YP_001505622.1 | 0.10271  |
| ZP_06414704.1  | 0.13314  | ZP_00995632.1  | 0.22894  | YP_003149002.1 | 0.27018  |
| YP_003155091.1 | 0.38187  | YP_003299252.1 | 0.35254  | YP_003652970.1 | 0.15793  |
| YP_003342499.1 | 0.17411  | YP_003161469.1 | 0.25532  | YP_003314180.1 | 0.08879  |
| YP_003637245.1 | 0.12883  | YP_003326714.1 | 0.15154  | YP_002881822.1 | 0.31793  |
| ZP_06906911.1  | 0.09223  | ZP_05367087.1  | 1.40E-04 | YP_003362822.1 | 1.40E-04 |

KS3 Group 3L

|                |          |                |          |                |          |
|----------------|----------|----------------|----------|----------------|----------|
| YP_001854929.1 | 0.29215  | YP_001624251.1 | 0.109    | YP_831948.1    | 0.08167  |
| YP_002488265.1 | 0.0527   | YP_948166.1    | 0.03204  | ZP_06503400.1  | 0.00158  |
| YP_002957004.1 | 0.02143  | YP_001222359.1 | 1.40E-04 | YP_001710322.1 | 0.01186  |
| YP_062220.1    | 0.25075  | ZP_01129639.1  | 0.13995  | ZP_06806178.1  | 0.21691  |
| ZP_05913015.1  | 0.28409  | YP_872634.1    | 0.46326  | NP_824120.1    | 0.05728  |
| ZP_06709944.1  | 0.11319  | YP_003340100.1 | 0.23114  | ADI05613.1     | 0.16585  |
| ZP_06236605.1  | 0.19412  | YP_713856.1    | 0.08417  | YP_481687.1    | 0.15653  |
| YP_002486436.1 | 0.29643  | YP_829805.1    | 0.10617  | ZP_05044619.1  | 0.42977  |
| NP_896496.1    | 0.14042  | YP_382507.1    | 0.21252  | YP_376477.1    | 0.14275  |
| ZP_01468596.1  | 0.1059   | ZP_04997010.1  | 0.07096  | ZP_06712230.1  | 0.06574  |
| YP_001103770.1 | 0.05849  | ZP_06565405.1  | 0.0437   | ZP_05478121.1  | 0.1985   |
| YP_003132910.1 | 0.20902  | YP_002778425.1 | 0.25608  | YP_117827.1    | 0.06805  |
| YP_881400.2    | 0.09328  | NP_962419.1    | 0.01324  | YP_883478.1    | 0.01105  |
| ZP_05218288.1  | 0.01085  | ZP_04748740.1  | 0.05657  | ZP_06848582.1  | 0.04261  |
| NP_960933.1    | 0        | ZP_05216417.1  | 0        | ABK67230.1     | 0        |
| YP_888603.1    | 0.13758  | YP_640530.1    | 0.02201  | ABB77262.1     | 0.1206   |
| YP_001134041.1 | 0.05188  | YP_954545.1    | 0.06453  | ZP_06851950.1  | 0.15598  |
| ZP_06847378.1  | 0.10241  | YP_905334.1    | 0.13941  | spO69473.2     | 0.01305  |
| NP_302137.1    | 0.03154  | ZP_02551630.1  | 0        | NP_216762.1    | 0        |
| pdb2GP6A       | 0        | ZP_03420752.1  | 0        | YP_955728.1    | 0.11464  |
| YP_001133067.1 | 0.07411  | YP_001069080.1 | 0.04781  | YP_637959.1    | 0.0556   |
| YP_001705331.1 | 0.04431  | YP_003657618.1 | 0.20774  | YP_954544.1    | 0.0317   |
| YP_640529.1    | 0.02972  | ABB77261.1     | 0.0832   | YP_001134042.1 | 0.10645  |
| YP_001702614.1 | 0.29246  | ZP_05224071.1  | 0.0059   | ZP_05216418.1  | 0        |
| YP_881401.2    | 0        | ZP_04748739.1  | 0.01161  | YP_003031688.1 | 1.40E-04 |
| ZP_06738705.1  | 0        | ZP_05221072.1  | 0        | ZP_06433499.1  | 0        |
| ZP_03537303.1  | 0        | ZP_02551631.1  | 0        | NP_216761.1    | 0        |
| pdb2WGFA       | 0.00404  | ZP_06848581.1  | 0.02815  | YP_905335.1    | 0.01164  |
| YP_001851619.1 | 1.50E-04 | CAA19201.1     | 0.14225  | NP_302136.1    | 1.40E-04 |
| YP_888602.1    | 0.05359  | YP_003647412.1 | 0.28013  | YP_003647663.1 | 0.01446  |
| YP_003660003.1 | 0.37051  | YP_003274222.1 | 0.13316  | YP_002767121.1 | 0.0057   |
| BAE66720.1     | 1.40E-04 | ZP_06829315.1  | 0.06329  | YP_701185.1    | 0.00413  |
| YP_002778116.1 | 0.00354  | YP_003099122.1 | 0.38307  | YP_003201410.1 | 0.26168  |
| ZP_06160624.1  | 0.43683  | YP_003151484.1 | 0.31758  | YP_003182339.1 | 0.20791  |
| ADI05720.1     | 1.01041  | YP_001613165.1 | 0.66288  | YP_001221421.1 | 0.39455  |
| ZP_05915453.1  | 0.71085  | CBL15418.1     | 0.81825  | YP_290032.1    | 0.6036   |
| NP_001046196.1 | 0.70299  | ZP_01011633.1  | 0.61056  | YP_001755735.1 | 0.10169  |
| YP_001771620.1 | 0.07816  | YP_002497158.1 | 0.2626   | YP_001927689.1 | 0.01783  |
| YP_001641984.1 | 0        | YP_002423698.1 | 0        | YP_002965875.1 | 0.00577  |
| YP_001370916.1 | 0.03587  | NP_540030.1    | 0.00553  | ZP_05180768.1  | 0        |
| YP_221592.1    | 0        | ZP_05451116.1  | 0        | NP_697867.1    | 0        |
| YP_673879.1    | 0.15071  | NP_102826.1    | 0.03686  | ZP_05807959.1  | 0.02002  |
| YP_988924.1    | 0.10009  | YP_001609687.1 | 0.04214  | YP_033556.1    | 0.02639  |

KS3 Group 3L

|                |         |                |         |                |          |
|----------------|---------|----------------|---------|----------------|----------|
| YP_002972102.1 | 0.14395 | YP_032191.1    | 0.04527 | XP_002667559.1 | 0.02672  |
| YP_002549457.1 | 0.13188 | NP_354590.1    | 0.05736 | YP_002544816.1 | 0.02268  |
| YP_002976168.1 | 0.0112  | ZP_03501652.1  | 0       | YP_469979.1    | 0        |
| YP_002281624.1 | 0.00559 | YP_001978707.1 | 0.00769 | YP_768399.1    | 0.01629  |
| YP_002826322.1 | 0.02546 | NP_386045.1    | 0.00539 | YP_001327408.1 | 0.14959  |
| ZP_01226013.1  | 0.10419 | ZP_01439829.1  | 0.14206 | ZP_05377028.1  | 0.223    |
| ZP_05377031.1  | 0.44295 | YP_002289478.1 | 0.10796 | YP_001206625.1 | 0.0184   |
| YP_001239518.1 | 0.05638 | NP_770448.1    | 0.35056 | YP_569223.1    | 0.05385  |
| YP_780944.1    | 0.04284 | YP_531981.1    | 0.04104 | YP_576785.1    | 0.00939  |
| YP_317857.1    | 0.01727 | ZP_01046402.1  | 0.01119 | YP_486963.1    | 0.04702  |
| ZP_06359644.1  | 0.02683 | YP_001991226.1 | 0.00561 | NP_947364.1    | 1.40E-04 |
| ZP_06865577.1  | 0.24666 | YP_001416166.1 | 0.23223 | YP_411098.1    | 0.22474  |
| ZP_05315082.1  | 0.2205  | ABZ10239.1     | 0.16924 | ABZ09514.1     | 0.12157  |
| YP_591445.1    | 0.54962 | YP_823189.1    | 0.32366 | CBL16355.1     | 1.13516  |
| YP_527929.1    | 1.54016 | YP_003321766.1 | 0.43799 | YP_002762103.1 | 0.321    |
| YP_003319262.1 | 0.33299 | YP_003011328.1 | 0.4135  | ZP_02927314.1  | 0.75585  |
| ZP_03128496.1  | 0.5687  | ZP_04336020.1  | 0.62324 | ZP_04218121.1  | 0.72335  |
| YP_001819288.1 | 1.09534 | YP_001716840.1 | 0.97743 | NP_925799.1    | 0.82341  |
| CAE51174.1     | 0.88865 | YP_003407323.1 | 0.36937 | ZP_04694914.1  | 0.32265  |
| YP_003638412.1 | 0.32518 | ZP_06474119.1  | 0.2868  | YP_714578.1    | 0.08334  |
| ZP_06410568.1  | 0.0775  | YP_481938.1    | 0.14534 | ZP_06239952.1  | 0.18189  |
| YP_001506731.1 | 0.021   | ZP_06474198.1  | 0.11083 | ZP_06475674.1  | 0.15819  |
| ADE35084.1     | 0.13224 | ZP_06400223.1  | 0.00286 | ZP_06215433.1  | 1.50E-04 |
| ZP_04604118.1  | 0.05412 | YP_001159324.1 | 0.05109 | YP_001537512.1 | 0.01008  |
| ZP_04331318.1  | 0.39454 | NP_824014.1    | 0.08766 | BAA92282.1     | 0.07556  |
| ZP_04689825.1  | 0.04311 | ZP_05537284.1  | 0.05727 | spQ02578.1     | 0.03665  |
| ZP_05534287.1  | 0.11968 | ZP_06708601.1  | 0.07852 | YP_003489944.1 | 0.04218  |
| ZP_05019159.1  | 0.04081 | BAA92283.1     | 0.05637 | NP_629460.1    | 0.22442  |
| spQ05356.1     | 0.18818 | ZP_06774389.1  | 0.17901 | ZP_06273114.1  | 0.11975  |
| ZP_05000774.1  | 0.05127 | AAR83903.1     | 0.08711 | ZP_05504791.1  | 0.05626  |
| ZP_06908836.1  | 0.1051  | ADI05885.1     | 0.14008 | YP_003111853.1 | 0.16338  |
| ZP_05513869.1  | 0.02324 | BAH68151.1     | 0.40207 | ABH85408.1     | 0.16247  |
| CAK51040.1     | 0.0301  | CAB72142.1     | 0.00268 | AAR30162.1     | 1.40E-04 |
| NP_851491.1    | 0.00567 | BAA87907.1     | 0.10556 | spP16538.1     | 0.19348  |
| CAM34345.1     | 0.12351 | AAG03067.1     | 0.08481 | YP_003135160.1 | 0.20681  |
| AAM33653.1     | 0.13672 | CAA61989.1     | 0.15154 | ACN64834.1     | 0.25946  |
| AAP85362.1     | 0.25074 | AAQ08916.1     | 0.34205 | YP_289279.1    | 0.22267  |
| AAP69573.1     | 0.44378 | YP_003300357.1 | 0.43357 | ADE34518.1     | 0.28586  |
| BAA23144.1     | 0.17595 | ADB23391.1     | 0.22757 | CAM58798.1     | 0.36062  |
| CAP12600.1     | 0.31571 | CAH10161.1     | 0.21712 | ADB02843.1     | 0.32229  |
| AAG30189.1     | 0.207   | AAV48829.2     | 0.15284 | ACI88861.1     | 0.14874  |
| AAC18107.1     | 0.10158 | AAA19616.1     | 0.00603 | NP_823552.1    | 0.1064   |
| ZP_06271604.1  | 0.08571 | ZP_06412663.1  | 0.3055  | ZP_05523867.1  | 1.60E-04 |



KS3 Group 3L

|                |          |                |          |                |          |
|----------------|----------|----------------|----------|----------------|----------|
| NP_629237.1    | 1.40E-04 | YP_483178.1    | 0.21698  | ZP_05514250.1  | 0.18745  |
| AAA26488.1     | 0.12447  | CAA54858.1     | 0.24532  | CBH32088.1     | 0.20856  |
| CBH32809.1     | 0.18789  | AAX57191.1     | 0.08968  | ZP_05511544.1  | 0.13643  |
| CAH10117.1     | 0.10378  | spP41175.1     | 0.17248  | AAK06784.1     | 0.10946  |
| ACP19353.1     | 0.13784  | AAO65346.1     | 0.2054   | CAA60569.1     | 0.05778  |
| YP_003114292.1 | 0.23419  | CAG14965.1     | 0.06626  | ZP_06274714.1  | 0.09406  |
| ACQ84440.1     | 0.04914  | BAJ07842.1     | 0.09135  | BAA92280.1     | 0.06322  |
| CAK51028.1     | 1.40E-04 | AAR30152.1     | 1.40E-04 | ZP_05017405.1  | 0.06834  |
| AAB36562.1     | 0.03999  | AAK57525.1     | 0.06571  | AAO65362.1     | 0.07459  |
| AAA67433.1     | 0.10946  | AAD13536.1     | 0.11236  | ACX83617.1     | 0.06322  |
| CAC05671.1     | 0.05345  | spP16540.1     | 0.06331  | AAD20267.1     | 0.11299  |
| BAC79044.1     | 0.17842  | ZP_06236449.1  | 0.19379  | ZP_05014210.1  | 0.08943  |
| ZP_05511572.1  | 0.05481  | AAK61718.1     | 0.07122  | ADI09964.1     | 0.11961  |
| BAB12566.1     | 1.40E-04 | BAA92279.1     | 0.08451  | BAA92277.1     | 0.00446  |
| spP43678.2     | 0.01014  | CAF34427.1     | 0.21731  | BAA82309.1     | 0.32503  |
| YP_003339797.1 | 0.20451  | ZP_05014197.1  | 0.36667  | ABX71148.1     | 0.12409  |
| ABX71114.1     | 0.14022  | AAR23326.1     | 0.14012  | CAE17527.1     | 0.05592  |
| ABL09959.1     | 0.15997  | BAA92281.1     | 0.08204  | CAJ42320.1     | 0.05518  |
| CAA12017.1     | 0.14207  | YP_003117176.1 | 0.3721   | YP_001159052.1 | 0.2419   |
| AAF81728.1     | 0.36367  | ZP_04991258.1  | 0.05805  | AAF70106.1     | 0.00689  |
| BAB72045.1     | 0.00496  | BAA92274.1     | 0.03365  | BAA92275.1     | 0.02272  |
| BAA92272.1     | 7.20E-04 | AAA87618.1     | 0.06988  | prf2104259E    | 1.40E-04 |
| AAA65206.1     | 1.40E-04 | ZP_06400790.1  | 0.04143  | ZP_06219891.1  | 0.22733  |
| ABC00726.1     | 0.21188  | BAA92276.1     | 0.10161  | NP_681411.1    | 0.64339  |
| YP_001734261.1 | 0.49872  | NP_441410.1    | 0.42788  | CAO87119.1     | 0.1821   |
| YP_001659498.1 | 0.04487  | ZP_05025752.1  | 0.35482  | YP_001515431.1 | 0.5408   |
| ZP_06380866.1  | 0.04522  | ZP_03274427.1  | 0.03317  | BAI90987.1     | 0.09098  |
| YP_720438.1    | 0.32031  | ZP_01620447.1  | 0.34703  | YP_002481986.1 | 0.49234  |
| YP_321757.1    | 0.08727  | YP_001866973.1 | 0.14224  | ZP_03768479.1  | 0.20252  |
| ZP_06309058.1  | 0.19441  | ZP_06304162.1  | 0.109    | YP_002375911.1 | 0.27348  |
| ZP_03153752.1  | 0.24518  | YP_002371403.1 | 0.19905  | YP_003136970.1 | 0.10217  |
| ZP_05035437.1  | 0.66662  | ZP_01856427.1  | 0.87829  | ZP_01092936.1  | 0.85099  |
| YP_001956501.1 | 1.08658  | ZP_05494450.1  | 1.55112  | ZP_01999727.1  | 1.62406  |
| CAJ73556.1     | 1.13487  | CAJ74369.1     | 0.7046   | CAL48956.1     | 1.268    |
| YP_634525.1    | 1.21131  | ZP_02733623.1  | 0.91265  | ZP_01089125.1  | 0.85118  |
| YP_003370172.1 | 0.78444  | YP_003630586.1 | 0.91534  | ZP_01857435.1  | 0.91375  |
| YP_003371367.1 | 0.58784  | ZP_01090368.1  | 0.75174  | YP_003629723.1 | 0.30422  |
| ZP_01851831.1  | 0.51604  | CAM58799.1     | 0.55551  | YP_483225.1    | 0.29799  |
| CAH10116.1     | 0.1147   | CAA60570.1     | 0.03832  | AAV57525.1     | 0.04506  |
| AAB36563.1     | 0.17956  | AAA65207.1     | 0.55223  | AAO65363.1     | 0.09222  |
| ADB02844.1     | 0.29638  | ABX71115.1     | 0.29373  | ABX71149.1     | 0.21397  |
| ZP_05017404.1  | 0.10908  | AAO65347.1     | 0.30786  | CAG14966.1     | 0.10926  |
| AAK57526.1     | 0.12509  | AAD13537.1     | 0.19091  | AAK61719.1     | 0.3039   |

KS3 Group 3L

|                |          |                |         |                |          |
|----------------|----------|----------------|---------|----------------|----------|
| CAA61990.1     | 0.3981   | ZP_05511573.1  | 0.36786 | AAA67434.1     | 0.30645  |
| ZP_05511545.1  | 0.57449  | ADI09965.1     | 0.14167 | ABL09958.1     | 0.18209  |
| ADE34519.1     | 0.33226  | AAZ78326.1     | 0.25405 | BAB12567.1     | 0.17193  |
| AAP85361.1     | 0.96984  | YP_003114293.1 | 0.58336 | spP41176.1     | 0.68647  |
| ZP_04991257.1  | 0.25405  | BAB72046.1     | 0.04839 | AAF70107.1     | 0.09696  |
| ZP_06274715.1  | 0.14693  | BAJ07844.1     | 0.23594 | YP_001159053.1 | 0.41195  |
| AAX57192.1     | 0.40789  | AAR30151.1     | 0.36265 | AAF81729.1     | 0.51588  |
| AAA26489.1     | 0.20391  | AAD20268.1     | 0.25733 | ACX83618.1     | 0.16275  |
| ZP_05514249.1  | 0.14918  | ZP_05014198.1  | 0.3385  | YP_483177.1    | 0.27608  |
| ZP_05523866.1  | 1.50E-04 | pdb1TQYB       | 0.11776 | NP_629238.1    | 0.24894  |
| ZP_06412664.1  | 0.36289  | BAC79045.1     | 0.23417 | CAB38455.1     | 0.27893  |
| spP16539.2     | 0.05551  | CBH32089.1     | 0.17907 | CBH32808.1     | 0.17127  |
| CAA12018.1     | 0.30789  | AAR23327.1     | 0.26654 | ACN64835.1     | 0.41732  |
| ZP_06271605.1  | 0.0821   | NP_823551.1    | 0.01153 | ACP19354.1     | 0.23933  |
| ZP_06236450.1  | 0.48577  | CAA54859.1     | 0.42653 | ADB23392.1     | 0.52167  |
| YP_003300356.1 | 0.35664  | AAQ08917.1     | 0.456   | YP_003135161.1 | 0.41405  |
| AAM33654.1     | 0.1362   | AAG03068.1     | 0.35385 | ZP_06474197.1  | 0.57901  |
| YP_003407322.1 | 0.66464  | YP_481937.1    | 0.17767 | YP_714577.1    | 0.20004  |
| ZP_06474120.1  | 0.43167  | ZP_06239951.1  | 0.22566 | ZP_06410569.1  | 0.22729  |
| ZP_04331319.1  | 0.74992  | ZP_05000773.1  | 0.28089 | YP_003489945.1 | 0.0914   |
| ZP_05537285.1  | 0.10858  | ZP_05019158.1  | 0.09401 | ZP_05534288.1  | 0.15879  |
| spQ05357.1     | 0.28485  | spQ02579.1     | 0.18488 | AAG26880.1     | 0.1871   |
| ZP_04689824.1  | 0.15856  | ADI05886.1     | 0.27968 | ZP_05513870.1  | 0.07938  |
| ZP_06708600.1  | 0.16429  | YP_003638413.1 | 0.64909 | ZP_04710102.1  | 0.15     |
| ZP_04694915.1  | 0.06787  | ZP_06475673.1  | 0.5111  | ZP_06215432.1  | 0.23415  |
| YP_001159323.1 | 0.4921   | ZP_06400222.1  | 0.19432 | NP_925798.1    | 1.24491  |
| CAE51175.1     | 1.31939  | ACH85585.1     | 1.42245 | YP_001507666.1 | 0.45545  |
| ZP_05512102.1  | 0.4417   | ZP_04996399.1  | 0.28237 | YP_711539.1    | 0.50802  |
| YP_713202.1    | 0.08218  | YP_094406.1    | 0.03166 | YP_001252229.1 | 0.00989  |
| YP_122767.1    | 1.40E-04 | YP_125769.1    | 0.00629 | ZP_06186528.1  | 0.29563  |
| ZP_05108663.1  | 0.46084  | YP_002152608.1 | 2.00709 | NP_287054.1    | 0.75864  |
| ZP_06656971.1  | 0.09671  | YP_001952428.1 | 1.25281 | ZP_04431836.1  | 1.42941  |
| YP_118118.1    | 0.44996  | YP_001108054.1 | 0.57407 | YP_003135480.1 | 0.31249  |
| YP_001105171.1 | 0.30919  | ZP_03312599.1  | 0.95901 | ZP_06404813.1  | 0.84366  |
| YP_003157640.1 | 0.92562  | YP_389151.1    | 0.42093 | YP_002435429.1 | 0.23634  |
| YP_011775.1    | 0.0107   | YP_460249.1    | 0.59052 | YP_847819.1    | 0.31728  |
| YP_003631669.1 | 1.23798  | ZP_01135301.1  | 1.03872 | YP_002908445.1 | 0.11545  |
| YP_366391.1    | 0.01795  | ZP_01628959.1  | 0.29388 | YP_001864952.1 | 0.1758   |
| YP_323103.1    | 0.00859  | AAA93155.1     | 0.00973 | NP_489395.1    | 1.40E-04 |
| ZP_06308630.1  | 0.16042  | ZP_03765704.1  | 0.06847 | CAM34277.1     | 0.61477  |
| ZP_05482537.1  | 0.16918  | ZP_05519919.1  | 0.06362 | ZP_05505192.1  | 0.08628  |
| ZP_06474532.1  | 0.61582  | ABJ98759.1     | 0.15303 | NP_821274.1    | 0.35097  |
| YP_003628511.1 | 0.22644  | ZP_02733786.1  | 0.22291 | ZP_01312929.1  | 0.22907  |

KS3 Group 3L

|                |          |                |          |                |          |
|----------------|----------|----------------|----------|----------------|----------|
| YP_902752.1    | 0.09049  | YP_002538591.1 | 0.06781  | YP_001230775.1 | 0.04659  |
| ZP_05311356.1  | 0.0311   | YP_002138914.1 | 0.00417  | YP_003021923.1 | 0.0078   |
| YP_001952503.1 | 0.16295  | YP_002604563.1 | 0.2494   | YP_001529557.1 | 0.19084  |
| ZP_01907910.1  | 0.31374  | YP_001611456.1 | 0.136    | YP_526162.1    | 0.31524  |
| YP_003203516.1 | 0.19475  | ZP_04690737.1  | 0        | ZP_06581582.1  | 0        |
| NP_624465.1    | 0.00498  | ZP_06533593.1  | 1.40E-04 | ZP_06414873.1  | 0.07373  |
| YP_711918.1    | 0.14131  | YP_002547431.1 | 0.28546  | ZP_05538111.1  | 0.07813  |
| ZP_06822883.1  | 0.03282  | YP_482018.1    | 0.24426  | ZP_06416258.1  | 0.03364  |
| YP_001508250.1 | 0.02532  | ZP_06475317.1  | 0.05458  | ZP_05519816.1  | 0.08993  |
| YP_713404.1    | 0.07566  | ADI03440.1     | 0.29476  | YP_001102300.1 | 0.17659  |
| YP_002430227.1 | 0.22821  | ZP_01889250.1  | 0.01569  | ZP_01255378.1  | 0.03571  |
| ABF00127.1     | 0.07273  | YP_738775.1    | 0        | YP_734794.1    | 0        |
| YP_870473.1    | 0        | NP_717214.1    | 0.0125   | YP_926992.1    | 0.127    |
| YP_964148.1    | 0.00232  | YP_001049812.1 | 0.00233  | YP_001553887.1 | 0.00233  |
| YP_001182853.1 | 0.00234  | YP_002358838.1 | 0.00234  | YP_001365632.1 | 0        |
| ACI12948.1     | 0        | ZP_01704383.1  | 0        | YP_563629.1    | 0.02563  |
| YP_749912.1    | 0.00732  | BAF64738.1     | 0.00445  | YP_001094790.1 | 0.04776  |
| ZP_01221855.1  | 0.0059   | YP_129673.1    | 0        | AAL01060.1     | 0        |
| ZP_01065944.1  | 1.60E-04 | YP_002417804.1 | 1.30E-04 | ZP_00990741.1  | 0.00236  |
| YP_003555951.1 | 0.0078   | ZP_02158284.1  | 0.02567  | YP_001759810.1 | 0.00434  |
| YP_001474934.1 | 0.01038  | YP_001675216.1 | 5.80E-04 | AAB81123.1     | 0.02145  |
| YP_001502760.1 | 0.00461  | YP_002312829.1 | 0.01551  | YP_269802.1    | 0.07877  |
| BAA89382.2     | 0.01411  | YP_943075.1    | 0.05362  | ZP_01216282.1  | 0.11794  |
| AAK72879.2     | 0.81267  | YP_001657798.1 | 0.06254  | NP_485686.1    | 0.01279  |
| YP_325239.1    | 0.01134  | NP_924905.1    | 0.22202  | NP_925794.1    | 0.18351  |
| ZP_03764926.1  | 0.05202  | ZP_06303629.1  | 0.01237  | ZP_06309131.1  | 0.01153  |
| YP_001864953.1 | 0.06488  | ZP_01628960.1  | 0.06494  | ZP_03765701.1  | 0.04503  |
| ZP_06308627.1  | 0.05946  | AAB82059.1     | 0.00691  | YP_001863788.1 | 1.40E-04 |
| YP_323100.1    | 0.00528  | NP_489391.1    | 0.00638  | ZP_01630197.1  | 0.03803  |
| YP_003468841.1 | 0.07251  | YP_003039750.1 | 0.04394  | AAK16098.1     | 0.03511  |
| ZP_03852152.1  | 0.3109   | YP_003121147.1 | 0.1185   | ZP_06475065.1  | 0.20862  |
| ZP_06239780.1  | 0.18572  | YP_001509871.1 | 0.04874  | ZP_06418152.1  | 0.04616  |
| YP_711796.1    | 0.05982  | YP_480040.1    | 0.08547  | YP_001625680.1 | 0.3074   |
| ZP_06567071.1  | 1.40E-04 | YP_001104568.1 | 1.50E-04 | NP_828537.1    | 0.12888  |
| YP_003114219.1 | 0.16391  | YP_003100278.1 | 0.11575  | ZP_04604233.1  | 0.3196   |
| YP_713125.1    | 0.14343  | ZP_06237636.1  | 0.1316   | ADI04101.1     | 0.10473  |
| YP_001533303.1 | 0.3552   | YP_823248.1    | 0.34047  | NP_927171.1    | 0.41649  |
| ZP_01017354.1  | 0.54763  | YP_002800097.1 | 0.1506   | ZP_01017353.1  | 0.43034  |
| NP_927172.1    | 0.23968  | YP_823247.1    | 0.19681  | YP_001533304.1 | 0.27455  |
| ZP_02736467.1  | 0.39345  | YP_003121148.1 | 0.18832  | ZP_03852153.1  | 0.11171  |
| YP_003299282.1 | 0.52768  | ACY06292.1     | 0.33135  | ZP_04604231.1  | 0.25113  |
| ZP_06475066.1  | 0.1875   | ZP_06241163.1  | 0.12134  | YP_001509872.1 | 0.04346  |
| YP_711795.1    | 0.0406   | ADI04100.1     | 0.12754  | YP_480039.1    | 0.04881  |

KS3 Group 3L

|                |          |                |          |                |          |
|----------------|----------|----------------|----------|----------------|----------|
| YP_003114220.1 | 0.23461  | YP_003100277.1 | 0.17261  | YP_001625679.1 | 0.26175  |
| NP_828538.1    | 0.10691  | ZP_06567072.1  | 0.0302   | ZP_06237637.1  | 0.11713  |
| YP_713126.1    | 0.14479  | YP_001036569.1 | 0        | YP_001104567.1 | 0.09572  |
| ZP_05429721.1  | 0        | YP_824341.1    | 0.15811  | YP_001875990.1 | 0.40352  |
| YP_001277223.1 | 0.00465  | AAO25836.1     | 0.12977  | YP_589544.1    | 0.20313  |
| YP_003101785.1 | 0.09508  | ZP_05487183.1  | 0.07998  | AAO25874.1     | 0.04498  |
| AAO25869.1     | 0.05877  | AAO25848.1     | 0.03452  | YP_003117046.1 | 0.14255  |
| AAO25858.1     | 0.05383  | ZP_05007174.1  | 0        | AAO25879.1     | 0.08253  |
| ZP_06776411.1  | 0        | AAO25889.1     | 0.13777  | ZP_06776526.1  | 1.40E-04 |
| ZP_05008088.1  | 1.40E-04 | YP_001822121.1 | 1.50E-04 | AAL06699.1     | 0.07058  |
| ZP_06276003.1  | 0.00235  | ZP_05000555.1  | 0.05785  | ZP_06582017.1  | 0        |
| ZP_04691137.1  | 0        | YP_001535471.1 | 0.12678  | AAO25904.1     | 0.11584  |
| AAO25852.1     | 0.07418  | AAQ17110.2     | 0.08368  | YP_001159519.1 | 0.09031  |
| YP_003342442.1 | 0.07005  | ZP_03155517.1  | 0.15644  | YP_001537032.1 | 0.06962  |
| AAM94794.1     | 0.04108  | YP_003265216.1 | 0.24888  | YP_001656298.1 | 0.14154  |
| YP_001543642.1 | 0.24054  | AAP92148.1     | 0.24725  | YP_003343641.1 | 0.26368  |
| AAO25864.1     | 0.20185  | YP_001157456.1 | 0.09291  | AAO25899.1     | 0        |
| AAN79725.1     | 0        | YP_113701.1    | 0.25919  | ZP_06398834.1  | 0.00569  |
| ZP_06217080.1  | 1.40E-04 | YP_002763824.1 | 0.00416  | CAO88199.1     | 0.2355   |
| ZP_04386432.1  | 1.40E-04 | AAK72880.2     | 1.83806  | YP_002136334.1 | 0.00746  |
| YP_002494425.1 | 0.04054  | ZP_06910398.1  | 0.36572  | YP_003631336.1 | 0.77195  |
| YP_001102302.1 | 0.34884  | YP_002547432.1 | 0.47094  | ZP_05538114.1  | 0.18603  |
| ZP_06711167.1  | 0.09942  | YP_926990.1    | 0.33832  | ZP_01216280.1  | 0.18063  |
| BAA89384.1     | 0.10854  | YP_001675218.1 | 0.03002  | YP_002312831.1 | 0.05174  |
| AAB81125.1     | 0.06635  | ZP_02158282.1  | 0.03897  | YP_001502762.1 | 0.02969  |
| YP_003555949.1 | 0.02305  | YP_001094792.1 | 0.19563  | YP_001474936.1 | 0.03002  |
| YP_001759808.1 | 0.04426  | ZP_01065946.1  | 0        | ZP_00990739.1  | 0.00381  |
| YP_002417806.1 | 0        | ZP_01221853.1  | 0.00648  | YP_129671.1    | 0        |
| AAL01062.1     | 0        | YP_870475.1    | 0.01169  | ABF00128.1     | 0.09716  |
| NP_717212.1    | 0.02156  | YP_964150.1    | 0.00455  | YP_734796.1    | 0.00951  |
| ZP_01704380.1  | 0.00456  | YP_002358840.1 | 1.40E-04 | YP_001049810.1 | 0.0047   |
| ACI12950.1     | 0.00668  | YP_563631.1    | 0.08441  | YP_001365630.1 | 0.00412  |
| YP_001553885.1 | 0.00227  | ZP_01255380.1  | 0.04112  | BAH10137.1     | 1.40E-04 |
| YP_749910.1    | 0.02541  | AAA93154.1     | 0.00583  | ZP_01889248.1  | 0.05744  |
| YP_323102.1    | 0.01008  | ZP_03765703.1  | 0.0724   | NP_489394.1    | 1.50E-04 |
| ZP_06308629.1  | 0.15256  | ZP_04690735.1  | 0.30931  | YP_003203515.1 | 0.26164  |
| YP_001611457.1 | 0.32267  | NP_624466.1    | 1.40E-04 | ZP_05490880.1  | 0.10984  |
| ZP_05528765.1  | 0.00255  | YP_526163.1    | 0.82955  | YP_760522.1    | 0.58488  |
| ZP_01907908.1  | 0.67724  | YP_001865722.1 | 0.37652  | YP_001106669.1 | 1.15147  |
| YP_001615531.1 | 0.48876  | YP_001580137.1 | 0.00673  | YP_631659.1    | 0.59427  |
| ZP_03588776.1  | 6.00E-04 | ZP_02372090.1  | 0        | YP_440535.1    | 0        |
| ZP_05589458.1  | 0        | ZP_02367011.1  | 0        | ZP_02385966.1  | 0        |
| ZP_02467660.1  | 0.03021  | ZP_02476892.1  | 0        | ZP_02359976.1  | 0        |

KS3 Group 3L

|                |          |                |          |                |          |
|----------------|----------|----------------|----------|----------------|----------|
| YP_001064252.1 | 0        | ZP_02461396.1  | 0        | ZP_03455632.1  | 0.00249  |
| ZP_02487427.1  | 0        | YP_112330.1    | 0        | ZP_04810813.1  | 0        |
| ZP_04889019.1  | 0        | YP_001077176.1 | 0        | ZP_02453265.1  | 0        |
| ZP_02503776.1  | 0        | ZP_02495537.1  | 0        | ZP_02408702.1  | 0        |
| ZP_04522244.1  | 0        | ZP_04820482.1  | 0        | YP_001025197.1 | 0        |
| YP_336634.1    | 0        | YP_001079551.1 | 0        | ZP_02511620.1  | 0        |
| ZP_04972475.1  | 0        | YP_990715.1    | 0        | ZP_04893494.1  | 0        |
| ZP_04898931.1  | 0        | ZP_00438145.2  | 0        | ZP_04883917.1  | 0        |
| ZP_04911836.1  | 0        | YP_003203170.1 | 0.44789  | YP_106596.1    | 0        |
| ADG39432.1     | 0.54945  | ZP_05495060.1  | 1.50334  | ZP_06143595.1  | 1.07707  |
| CBL16347.1     | 0.96319  | EEE21623.1     | 0.00182  | XP_762561.1    | 1.12509  |
| XP_002369051.1 | 0.00324  | XP_001930982.1 | 0.78786  | ZP_01724481.1  | 0.01026  |
| YP_001698934.1 | 1.50E-04 | ZP_04991992.1  | 0.32484  | XP_367899.2    | 0.53384  |
| ZP_04700325.1  | 0.80471  | AAO39787.1     | 0.58942  | ZP_05002580.1  | 0.33622  |
| ZP_05497960.1  | 0.7822   | ZP_04608935.1  | 0.23861  | ABD96134.1     | 0.58765  |
| ZP_04608930.1  | 0.21314  | AAW55409.1     | 0.52379  | ZP_05496379.1  | 0.58689  |
| ZP_02371221.1  | 0.42741  | ZP_04706417.1  | 0        | YP_001544779.1 | 0.35966  |
| YP_003490005.1 | 0.22212  | ZP_06276326.1  | 0.00349  | ZP_04713303.1  | 0        |
| ZP_04698103.1  | 0        | ABD17672.1     | 0.3257   | YP_001821790.1 | 0.01005  |
| BAG69125.1     | 0.4719   | CAQ16328.1     | 0.35649  | ADF57399.1     | 0.43665  |
| ACC99562.1     | 0.28206  | ZP_02509675.1  | 0        | AAW84217.1     | 0.21318  |
| ZP_02459432.1  | 1.50E-04 | ZP_02451261.1  | 0        | ZP_02501781.1  | 0        |
| ZP_02415186.1  | 0        | ZP_02493565.1  | 0        | ZP_00437977.1  | 0        |
| ZP_02474929.1  | 0        | ADI12768.1     | 0.09113  | ZP_02406687.1  | 1.40E-04 |
| ABS90472.1     | 0.05753  | ZP_04094218.1  | 1.50E-04 | AAQ91801.1     | 0.37369  |
| ZP_05495405.1  | 0.39548  | ACI15848.1     | 1.40E-04 | ZP_04315173.1  | 0.00265  |
| BAG69037.1     | 0.3129   | ACI15849.1     | 1.60E-04 | ACI15843.1     | 0.00967  |
| ACI15850.1     | 1.40E-04 | AAW84198.1     | 0.34098  | ACI15851.1     | 1.40E-04 |
| ZP_05497963.1  | 0.78942  | AAS98781.1     | 0.08617  | YP_002483586.1 | 0.32621  |
| AAT70101.1     | 0.16188  | AAQ91794.1     | 0.36322  | ACC99571.1     | 0.34096  |
| ZP_02468549.1  | 0.46866  | AAW84173.1     | 0.2798   | ADF57409.1     | 0.16707  |
| ACC99567.1     | 0.41259  | ABG54501.1     | 0.29185  | ACC99584.1     | 0.222    |
| ACT85959.1     | 0.16061  | ACZ54289.1     | 0.54277  | ADD65296.1     | 1.40E-04 |
| ADD65298.1     | 0.01012  | ZP_05543640.1  | 0.22014  | ABD96133.1     | 0.19848  |
| ABD96135.1     | 0.29931  | ACY71562.1     | 0.22832  | ACX31707.1     | 1.40E-04 |
| ACX31698.1     | 1.40E-04 | ACT85960.1     | 1.40E-04 | ADF36684.1     | 0.21466  |
| ACT85961.1     | 0.00486  | BAG68965.1     | 0.00533  | ABU25214.1     | 0.28632  |
| YP_632112.1    | 1.40E-04 | ZP_05495404.1  | 0.23874  | ABS82482.1     | 0.00956  |
| YP_001421789.1 | 5.10E-04 | ZP_02468523.1  | 0.33457  | ACC99573.1     | 0.22964  |
| AAW84171.1     | 0.34081  | ZP_06278979.1  | 0.28533  | AAX86995.1     | 0.46254  |
| ZP_06496711.1  | 0.35798  | BAG69126.1     | 0.46817  | ZP_01912681.1  | 0.13883  |
| BAG69112.1     | 0.08234  | BAG68990.1     | 0.00731  | ACC99570.1     | 0.39645  |
| BAG69000.1     | 0.02548  | ZP_06913880.1  | 0.10991  | BAG69124.1     | 0.3751   |

KS3 Group 3L

|                |          |                |          |                |          |
|----------------|----------|----------------|----------|----------------|----------|
| BAF50722.1     | 0.12177  | ABR19765.1     | 0.00984  | ZP_05496380.1  | 0.14728  |
| ABQ15135.1     | 0.00493  | ABR19766.1     | 0.03017  | ABQ15134.1     | 0.00489  |
| ABR19778.1     | 0.00424  | ZP_02371222.1  | 0.33609  | ABR19767.1     | 0.00991  |
| ABR19770.1     | 0.00991  | ZP_02371211.1  | 0.19143  | ADF57396.1     | 0.38786  |
| ZP_04610438.1  | 0.41621  | ZP_02501775.1  | 0        | ZP_02385106.1  | 0.03586  |
| ZP_02406678.1  | 0.04283  | ZP_02451253.1  | 0        | ZP_02474922.1  | 0        |
| ZP_02493560.1  | 0.00277  | YP_338454.1    | 0        | ZP_02415179.1  | 0        |
| YP_337768.1    | 0        | ZP_03790872.1  | 0.0901   | ZP_02509669.1  | 0        |
| ZP_02485421.1  | 0        | ZP_02417352.1  | 0        | ZP_02509673.1  | 0        |
| ZP_02485424.1  | 0        | ZP_02451257.1  | 1.50E-04 | ZP_02474926.1  | 0        |
| ZP_02459427.1  | 0        | ZP_02501779.1  | 0.00279  | ZP_02408757.1  | 0.04671  |
| ZP_02493564.1  | 1.60E-04 | AAY00035.1     | 0.53338  | ZP_05543636.1  | 0.36813  |
| ABG54500.1     | 0.45423  | ACI15846.1     | 1.60E-04 | ZP_02371244.1  | 0        |
| ZP_02385142.1  | 0        | NP_851434.1    | 0.33344  | ACI15845.1     | 0.00954  |
| YP_434655.1    | 0.23946  | ZP_02385114.1  | 1.40E-04 | AAX44121.1     | 0.56041  |
| YP_002268378.1 | 0.57864  | YP_001421793.1 | 0        | ZP_02371220.1  | 0.00384  |
| CAJ57408.1     | 0        | ZP_06496704.1  | 0.72492  | CAA84505.1     | 1.40E-04 |
| ABR19775.1     | 0.04956  | ZP_05495052.1  | 0.47906  | ZP_05495047.1  | 0.45867  |
| ZP_05495045.1  | 0.54671  | ZP_02381462.1  | 0.37031  | ZP_05498156.1  | 0.61358  |
| YP_003124921.1 | 0.32908  | ZP_05496378.1  | 0.18549  | CAM74045.1     | 0.34928  |
| AAM12925.1     | 0.56971  | ZP_06399854.1  | 0.20672  | CAN89635.1     | 0.28253  |
| ZP_06822185.1  | 0.20633  | ZP_02163864.1  | 0.27625  | ZP_06913872.1  | 0.36568  |
| ABK32260.1     | 0.42515  | BAG69067.1     | 0.22027  | CAJ57411.1     | 0        |
| YP_001421790.1 | 0        | ZP_02493563.1  | 0        | ZP_02415181.1  | 0        |
| ZP_02451256.1  | 0        | ZP_02501777.1  | 0        | ZP_02474925.1  | 0        |
| ZP_02459426.1  | 0        | ZP_02406680.1  | 0        | ZP_02509672.1  | 0        |
| ZP_02485423.1  | 0        | YP_237380.1    | 0.01589  | ZP_02468254.1  | 0.37173  |
| ZP_06496713.1  | 1.50E-04 | ZP_02385109.1  | 0.00277  | ZP_05495051.1  | 0.43928  |
| ZP_02371212.1  | 1.40E-04 | ZP_02371230.1  | 1.60E-04 | AAM12911.1     | 0.37467  |
| ZP_02385126.1  | 1.40E-04 | ZP_02375784.1  | 0.00498  | ACR55660.1     | 0.28825  |
| ZP_02385138.1  | 4.60E-04 | YP_001231834.1 | 0.30238  | ZP_02371209.1  | 0.00264  |
| ZP_02385102.1  | 1.50E-04 | ACI15837.1     | 0.00946  | ZP_05498212.1  | 0.19129  |
| ZP_05495048.1  | 0.56318  | YP_002505211.1 | 0.19687  | ACI15847.1     | 1.40E-04 |
| YP_002505215.1 | 0.26384  | YP_001421032.1 | 0        | YP_001421029.1 | 0.17936  |
| ABH03697.1     | 0.01047  | ZP_04608938.1  | 0.34565  | CAG23968.1     | 0        |
| BAF50721.1     | 0.66428  | BAG69045.1     | 0.29837  | ZP_02371218.1  | 0.005    |
| ZP_02385113.1  | 1.30E-04 | ZP_02468387.1  | 0.22942  | CAM74044.1     | 0.31814  |
| ZP_06496708.1  | 0.51236  | ZP_05498213.1  | 0.04481  | ZP_02371216.1  | 0        |
| ZP_02385111.1  | 0        | ZP_02415175.1  | 0        | ZP_05498070.1  | 0.0313   |
| ZP_02451251.1  | 0        | ZP_02474918.1  | 0        | ZP_02501773.1  | 0        |
| ZP_02459419.1  | 0        | ZP_02509668.1  | 0        | ZP_02485417.1  | 0        |
| ZP_02406672.1  | 0        | ZP_05591274.1  | 0        | ZP_02493558.1  | 0        |
| ZP_02468933.1  | 0.63989  | ZP_02385095.1  | 0        | ZP_02371199.1  | 0        |

KS3 Group 3L

|                |          |                |          |                |          |
|----------------|----------|----------------|----------|----------------|----------|
| YP_439858.1    | 0        | ZP_02451250.1  | 0        | ZP_02406669.1  | 0        |
| ZP_02415174.1  | 0        | ZP_02474917.1  | 0        | ZP_02459418.1  | 0        |
| ZP_02501772.1  | 0        | ZP_02474942.1  | 0.00276  | ZP_02485416.1  | 0        |
| ZP_02509667.1  | 0        | YP_335161.1    | 0        | ZP_02493575.1  | 1.40E-04 |
| YP_111015.1    | 0        | ZP_03450421.1  | 0        | ZP_04523111.1  | 0        |
| ZP_03790877.1  | 0        | ZP_02415202.1  | 0        | ZP_02408779.1  | 0        |
| ZP_01770135.1  | 0        | ZP_02485441.1  | 0        | YP_001075430.1 | 0        |
| ZP_02509688.1  | 0        | ZP_00439135.1  | 0        | ZP_02451272.1  | 0        |
| ZP_02501792.1  | 0        | ZP_04890085.1  | 0.00272  | ZP_02269298.1  | 0        |
| ZP_02459447.1  | 1.40E-04 | CAO82982.1     | 1.40E-04 | YP_001062477.1 | 1.40E-04 |
| ZP_04608934.1  | 0.30556  | ZP_01913336.1  | 0.48315  | CAO82978.1     | 1.50E-04 |
| CAO82977.1     | 1.40E-04 | ZP_02385098.1  | 0.0031   | YP_434660.1    | 0.21897  |
| NP_851438.1    | 0.20953  | ZP_02365034.1  | 0.00276  | ZP_02371202.1  | 0.00622  |
| ZP_02467704.1  | 0.34503  | ZP_02371775.1  | 0        | ZP_02357871.1  | 0.00303  |
| ZP_02385634.1  | 0        | ZP_02473911.1  | 0.00241  | ZP_02405573.1  | 1.40E-04 |
| ZP_02414102.1  | 1.40E-04 | ZP_02500729.1  | 0        | ZP_02492545.1  | 0.00292  |
| ZP_02450186.1  | 0        | YP_001231832.1 | 0.36173  | ZP_02508670.1  | 0        |
| ZP_02484360.1  | 0.00293  | AAQ91795.1     | 1.40E-04 | ZP_05498180.1  | 0.15996  |
| AAZ99722.1     | 0.25655  | BAG69111.1     | 0.32966  | AAQ91797.1     | 1.50E-04 |
| ZP_05519321.1  | 0.3262   | ZP_06589120.1  | 0.11329  | ZP_04700328.1  | 0.66285  |
| ZP_04700324.1  | 0.56184  | ZP_04700331.1  | 0.01027  | ACN13113.1     | 0.00776  |
| ACR61390.1     | 1.40E-04 | ADF36708.1     | 0.38167  | ACS45382.1     | 0.00486  |
| YP_001866472.1 | 0.4075   | BAG69046.1     | 1.40E-04 | ZP_01997720.1  | 0.21436  |
| ACY71549.1     | 0.00484  | ZP_02196089.1  | 0.5937   | ZP_05495053.1  | 0.73963  |
| YP_276662.1    | 0.29769  | ZP_06889850.1  | 0.54457  | YP_001983454.1 | 0.42667  |
| ZP_05498155.1  | 0.31231  | ZP_02385135.1  | 1.40E-04 | BAG69079.1     | 0.36901  |
| ZP_01692310.1  | 1.33241  | ZP_06276710.1  | 0.00293  | ZP_02371238.1  | 0.00538  |
| YP_001828289.1 | 1.40E-04 | CAM34281.1     | 0.96239  | CAL69888.1     | 0.12118  |
| YP_260103.1    | 0.15072  | ZP_02365037.1  | 0.05535  | ZP_05495044.1  | 0.53099  |
| ZP_02371774.1  | 0.00271  | ZP_02458364.1  | 0        | ZP_02405578.1  | 1.40E-04 |
| ZP_02508673.1  | 0.00269  | ZP_02484364.1  | 0        | ZP_02500732.1  | 0        |
| ZP_02414106.1  | 0        | ZP_02473916.1  | 0.00269  | ZP_02450189.1  | 0        |
| ZP_02492548.1  | 0.00267  | CAO82985.1     | 0.2728   | ZP_02385633.1  | 0.00303  |
| ACY71560.1     | 0.55514  | ABH03695.1     | 0.54798  | ZP_06496705.1  | 0.61371  |
| ZP_06890653.1  | 0.45107  | CAM74190.1     | 0.59199  | ACY71559.1     | 0.37586  |
| ZP_04608929.1  | 0.30882  | ZP_04993817.1  | 0        | BAG69061.1     | 0.0072   |
| ABD17674.1     | 0.00741  | CAQ16326.1     | 0.23923  | ZP_06822182.1  | 0        |
| YP_002505216.1 | 0.57368  | ADE08320.1     | 0.34844  | 0.757          | 0.05936  |
| BAG69102.1     | 0.35791  | ACF54738.1     | 0.08339  | ABO93198.1     | 0.30547  |
| ZP_06496703.1  | 0.39173  | ZP_04315031.1  | 0        | ACF54741.1     | 0.02071  |
| CAN89633.1     | 0.62622  | CAM34323.1     | 1.40E-04 | CAM34273.1     | 1.40E-04 |
| CAM34274.1     | 0.00453  | ZP_02163866.1  | 0.6106   | YP_723336.1    | 0.1578   |
| AAX44129.1     | 0.27144  | ZP_02501787.1  | 0        | ZP_02493571.1  | 0.00257  |

KS3 Group 3L

|                |          |               |          |               |          |
|----------------|----------|---------------|----------|---------------|----------|
| ZP_02451266.1  | 0        | ZP_02474937.1 | 0        | ZP_02459441.1 | 0        |
| ZP_02406696.1  | 0        | ZP_02509683.1 | 1.40E-04 | ZP_02485435.1 | 0        |
| ZP_02415194.1  | 0        | ACF54735.1    | 0.00345  | CAM74077.1    | 0.24786  |
| AAX86996.1     | 0.00467  | CAM74192.1    | 0.21443  | AAO39782.1    | 0.01637  |
| ACF54736.1     | 0.18422  | ABB73270.1    | 0.00813  | ADF57403.1    | 1.40E-04 |
| ADF36685.1     | 0.00467  | ABR19768.1    | 0.08621  | ABB73271.1    | 1.40E-04 |
| ABB73272.1     | 0.00454  | ACG70841.1    | 1.60E-04 | ACG70843.1    | 0.05887  |
| AAZ99721.1     | 0.01437  | ABR19776.1    | 1.40E-04 | ABU25212.1    | 0.02357  |
| ACG70842.1     | 0.00922  | ACY01392.1    | 0.2532   | CAM34275.1    | 0.04732  |
| CAM34276.1     | 0.0613   | ACX31711.1    | 1.30E-04 | ACN13112.1    | 0.01856  |
| ACN13122.1     | 1.40E-04 | ACT85958.1    | 0.08398  | ACX31696.1    | 1.40E-04 |
| ZP_05498157.1  | 0.11114  | ABR19779.1    | 0.00463  | ABR19769.1    | 1.60E-04 |
| ABR19772.1     | 0.00465  | ACB47225.1    | 0.24347  | ABR19764.1    | 0.00466  |
| ABR19774.1     | 0.00931  | ZP_02467735.1 | 1.01129  | YP_434662.1   | 0.2487   |
| NP_851440.1    | 0.16326  | ACI15844.1    | 2.70E-04 | ZP_02467783.1 | 0.42132  |
| ACX31706.1     | 0.40937  | ACI15840.1    | 0.00446  | ACI15839.1    | 0.00894  |
| ACI15838.1     | 1.40E-04 | YP_632118.1   | 0.44315  | ACI15842.1    | 1.00E-04 |
| YP_002966293.1 | 0.36913  | ZP_02501767.1 | 0        | ADD82939.1    | 0.33587  |
| ZP_02459413.1  | 0        | ZP_02493555.1 | 0        | ZP_03793244.1 | 0        |
| ZP_02415169.1  | 0        | YP_989785.1   | 0        | ZP_02406663.1 | 0        |
| ZP_02474912.1  | 0        | ZP_02485414.1 | 0        | ZP_02509663.1 | 0        |
| ZP_00439228.1  | 0        | ZP_02468378.1 | 0.72581  | ZP_02451247.1 | 1.60E-04 |
| AAQ91798.1     | 0.35848  | ZP_04991998.1 | 0        | ZP_02468661.1 | 1.13828  |
| BAF50720.1     | 0.9299   | ZP_06217421.1 | 0.00681  | ZP_06822203.1 | 0        |
| YP_003113351.1 | 0.40416  | ZP_06143593.1 | 0.72793  | ZP_06401528.1 | 1.50E-04 |
| YP_003073734.1 | 1.13685  |               |          | ZP_02951181.1 | 0.39454  |



KS3 Group 3M

| Sequence       | Distance | Sequence       | Distance | Sequence       | Distance |
|----------------|----------|----------------|----------|----------------|----------|
| XP_760252.1    | 0.68744  | XP_002394108.1 | 0.12368  | XP_001835415.1 | 0.34783  |
| XP_001876029.1 | 0.25139  | XP_002377153.1 | 0        | XP_001821376.1 | 0        |
| EDP49937.1     | 0.02458  | XP_002837130.1 | 0.15534  | XP_001939987.1 | 0.29324  |
| EEY23691.1     | 0.28014  | XP_001903585.1 | 0.26362  | XP_384140.1    | 0.27637  |
| XP_001210065.1 | 0.21669  | XP_002478017.1 | 0.12404  | XP_002486858.1 | 0.12302  |
| XP_762565.1    | 0.88192  | ABD47521.1     | 0.09824  | XP_001911464.1 | 0.1713   |
| AAS98202.1     | 0.29627  | AAAY00095.1    | 0.03281  | ABQ11398.1     | 0.00758  |
| ABQ11393.1     | 0.0113   | ABQ11392.1     | 0.00232  | AAAY00107.1    | 1.40E-04 |
| AAAY00122.1    | 0.00459  | ABQ08172.1     | 0.03503  | ABV71348.1     | 0.09338  |
| ABQ08166.1     | 0.05029  | ABQ08177.1     | 0.07873  | AAAY00069.1    | 0.02404  |
| AAAY00063.1    | 0.00942  | AAAY00064.1    | 0.00508  | AAAY00065.1    | 0.00468  |
| AAAY00092.1    | 0.30455  | ABQ08165.1     | 0.16192  | ABQ08171.1     | 0.15636  |
| ABQ08170.1     | 0.09636  | AAAY00053.1    | 0.03637  | AAAY00054.1    | 0.00748  |
| AAAY00134.1    | 0.0597   | AAAY00066.1    | 0.04359  | AAAY00072.1    | 0.0587   |
| AAAY00116.1    | 0.11074  | XP_382500.1    | 1.40E-04 | AAS57296.1     | 0.01381  |
| AAU10633.1     | 0.00991  | XP_001798591.1 | 0.08266  | AAAY00086.1    | 1.40E-04 |
| ABQ11386.1     | 1.40E-04 | AAS48892.1     | 0.00561  | EEU40203.1     | 0.0052   |
| XP_001216121.1 | 0.00796  | BAB88689.1     | 0.01612  | ABQ11396.1     | 1.40E-04 |
| AAAY00129.1    | 1.40E-04 | AAAY00087.1    | 1.50E-04 | ABQ11395.1     | 1.40E-04 |
| XP_002478062.1 | 0.01507  | XP_002145792.1 | 0.03154  | XP_001390425.1 | 0.05655  |
| AAS98199.1     | 0.14044  | CAB92399.1     | 0.00538  | AAR92211.1     | 1.40E-04 |
| XP_001827098.1 | 1.60E-04 | XP_002384329.1 | 0.00257  | XP_002847317.1 | 0.15997  |
| AAAY00136.1    | 0.02337  | ABQ11391.1     | 1.60E-04 | AAAY00098.1    | 1.40E-04 |
| ABQ11390.1     | 0        | ABQ11400.1     | 0        | AAAY00097.1    | 0.00974  |
| AAAY00105.1    | 0.0047   | ABQ11399.1     | 1.50E-04 | AAAY00108.1    | 0.00467  |
| AAAY00085.1    | 0.01589  | ABQ11394.1     | 0.00341  | AAAY00123.1    | 0.0094   |
| AAAY00091.1    | 1.40E-04 | ABQ11389.1     | 1.60E-04 | AAAY00093.1    | 1.40E-04 |
| ABQ11388.1     | 1.60E-04 | AAS98198.1     | 0.02913  | EFE40680.1     | 1.50E-04 |
| XP_002842704.1 | 0.04894  | EFE33242.1     | 0.00262  | AAP68701.1     | 0.20863  |
| XP_002483004.1 | 0.16076  | XP_002373130.1 | 0.00264  | XP_001817959.1 | 1.40E-04 |
| XP_001215384.1 | 0.13903  | EEU34216.1     | 0.04784  | AAS57288.1     | 0.04691  |
| AAR92210.1     | 1.40E-04 | CAC88775.1     | 0.01317  | XP_001592760.1 | 0.1386   |
| XP_368816.2    | 0.17362  | AAT69682.1     | 0.16013  | XP_001798923.1 | 0.12559  |
| XP_001800218.1 | 0.31667  | XP_001241406.1 | 0        | EER28351.1     | 0        |
| AAS90047.1     | 0.00535  | AAU08792.1     | 1.60E-04 | BAE71314.1     | 0        |
| AAS90022.1     | 0        | XP_002379951.1 | 0        | XP_001821511.1 | 0        |
| AAR32704.2     | 0        | AAS89999.1     | 0.00265  | spQ12053.1     | 1.40E-04 |
| XP_001911528.1 | 0.06148  | XP_681094.1    | 0        | spQ12397.2     | 0        |
| AAA81586.1     | 0        | ACH72912.1     | 0.02636  | AAZ95017.1     | 0.0524   |
| AAS92537.1     | 0.15522  | AAAY00070.1    | 0.04013  | AAAY00068.1    | 0.02396  |
| AAAY00067.1    | 0.00463  | ABQ11380.1     | 1.50E-04 | XP_002147717.1 | 0.02776  |
| XP_002481882.1 | 0.01133  | ABQ85550.1     | 0.02794  | XP_002568608.1 | 0.02134  |

KS3 Group 3M

|                |          |                |          |                |          |
|----------------|----------|----------------|----------|----------------|----------|
| CAB44712.1     | 0.0134   | XP_681478.1    | 1.40E-04 | prf1905375A    | 0        |
| spQ03149.2     | 0        | XP_001276035.1 | 0.01704  | XP_001261235.1 | 0.00275  |
| ACJ13038.1     | 0        | ACJ13036.1     | 0        | XP_756095.1    | 0        |
| EDP55264.1     | 0        | ACJ13039.1     | 0        | ACJ13037.1     | 0        |
| AAC39471.1     | 0        | ACJ13035.1     | 0        | ACJ13034.1     | 0        |
| CAA76740.1     | 0.00542  | XP_001393884.1 | 0.04276  | XP_001822700.1 | 0        |
| XP_002382817.1 | 0        | CAB44699.1     | 0.00447  | AAAY00120.1    | 0.04246  |
| AAAY00083.1    | 1.40E-04 | ABQ11387.1     | 1.40E-04 | AAAY00121.1    | 0.02244  |
| ABQ11385.1     | 1.60E-04 | AAAY00079.1    | 1.40E-04 | AAAY00080.1    | 0.00986  |
| AAAY00074.1    | 0.01736  | AAAY00081.1    | 0.02317  | AAAY00128.1    | 1.40E-04 |
| ABQ11397.1     | 1.50E-04 | AAAY00127.1    | 1.60E-04 | AAAY00088.1    | 1.60E-04 |
| CAB44698.1     | 0.16267  | AAAY00090.1    | 0.14005  | AAAY00078.1    | 0.16458  |
| XP_002483594.1 | 0.03993  | XP_002152334.1 | 0.0336   | AAP79126.1     | 0.08479  |
| AAN74983.1     | 0.01498  | AAAY00117.1    | 0.01401  | AAAY00104.1    | 0.00867  |
| AAAY00094.1    | 0.02476  | AAAY00109.1    | 0.01     | AAAY00124.1    | 0.01935  |
| XP_001553397.1 | 0        | AAR90250.1     | 0        | XP_001805964.1 | 0.06446  |
| BAB88752.1     | 0.00592  | XP_001211612.1 | 0.00276  | XP_002376725.1 | 0.00177  |
| XP_001820992.1 | 0.00116  | XP_001275038.1 | 0.03871  | XP_001402309.1 | 0.05887  |
| EDP47078.1     | 0        | XP_746435.1    | 0        | XP_001267621.1 | 0.01239  |
| XP_002846705.1 | 0.1782   | EDP47964.1     | 0        | XP_746913.1    | 0        |
| XP_001262597.1 | 0.00571  | XP_002848092.1 | 0.00294  | EFE32713.1     | 0.00529  |
| EFE44835.1     | 1.40E-04 | XP_663604.1    | 0.11116  | XP_001394705.1 | 0.06274  |
| XP_001823362.1 | 1.60E-04 | XP_664675.1    | 0.0785   | AAR90274.1     | 0.31617  |
| XP_001266579.1 | 0.12042  | XP_002149615.1 | 0.1206   | XP_657754.1    | 0.07599  |
| XP_751377.1    | 0        | EDP50840.1     | 0        | XP_001266594.1 | 0.00704  |
| XP_001217072.1 | 0.12512  | AAP79127.1     | 0.00928  | AAP79128.1     | 1.40E-04 |
| XP_002144865.1 | 0.1271   | XP_002482902.1 | 0.03771  | XP_001933041.1 | 0.04797  |
| AAR90273.1     | 0.05538  | XP_002482968.1 | 0.03438  | XP_002486039.1 | 0.10283  |
| AAAY00100.1    | 0.01426  | ADB77860.1     | 1.40E-04 | ADB77861.1     | 0.00497  |
| XP_001802212.1 | 0.02638  | XP_001933656.1 | 0.00832  | AAR90272.1     | 1.40E-04 |
| BAD22832.1     | 0.00267  | ACS74442.1     | 1.50E-04 | ACS74444.1     | 0.00287  |
| ACS74443.1     | 0.00237  | ACS74441.1     | 1.40E-04 | ACS74449.1     | 0.00891  |
| AAAY00057.1    | 0.0319   | AAAY00102.1    | 0.01742  | AAAY00113.1    | 0.00941  |
| AAAY00061.1    | 0.00924  | AAAY00060.1    | 1.40E-04 | AAP68704.1     | 0.02576  |
| AAAY00106.1    | 0.01204  | ABQ08181.1     | 0.01899  | AAAY00062.1    | 1.50E-04 |
| AAAY00056.1    | 1.40E-04 | AAAY00101.1    | 1.50E-04 | ABU63483.1     | 0.05332  |
| AAAY00103.1    | 0.15794  | AAAY00082.1    | 0.01751  | AAAY00071.1    | 1.60E-04 |
| AAAY00111.1    | 0.00527  | ACJ39411.1     | 0.03891  | AAN75188.1     | 0.09056  |
| AAD31436.3     | 0.01731  | ACJ39412.1     | 0.07998  | AAP68703.1     | 0.06619  |
| XP_002149119.1 | 0.13606  | XP_001585805.1 | 0.01282  | XP_001547095.1 | 0.00514  |
| AAR90249.1     | 1.40E-04 | ABV71370.1     | 0.55319  | ACF10233.1     | 0.19913  |
| AAP68700.1     | 0.03476  | XP_001210231.1 | 1.40E-04 | BAB88688.1     | 0.00539  |
| ABQ08174.1     | 0.04083  | ABQ08167.1     | 0.06696  | ACL99720.1     | 0.06096  |

# KS3 Group 3M

|                |          |                |          |                |          |
|----------------|----------|----------------|----------|----------------|----------|
| ACL99722.1     | 0.02387  | ACL99721.1     | 0.1206   | ACF10189.1     | 0.01533  |
| ACF10196.1     | 1.40E-04 | ACF10204.1     | 1.10E-04 | ACF10199.1     | 1.40E-04 |
| ACF10185.1     | 1.40E-04 | ACF10187.1     | 1.40E-04 | ACF10182.1     | 0.00364  |
| ACF10228.1     | 1.40E-04 | ACF10224.1     | 1.40E-04 | ACF10205.1     | 1.30E-04 |
| ACF10183.1     | 1.40E-04 | ACF10190.1     | 0.01575  | ACF10184.1     | 1.40E-04 |
| ACF10186.1     | 1.40E-04 | ACF10219.1     | 0.00289  | ACF10232.1     | 1.40E-04 |
| ACF10231.1     | 1.40E-04 | ACF10198.1     | 0.00256  | ACF10201.1     | 0.01181  |
| ACF10217.1     | 1.40E-04 | AAAY00119.1    | 0.04424  | AAAY00059.1    | 0.02149  |
| ABQ08169.1     | 1.50E-04 | ABQ08173.1     | 0.04308  | ABQ08180.1     | 0.0047   |
| ABV71349.1     | 0.01526  | ABQ08175.1     | 1.60E-04 | ABV71352.1     | 0.01753  |
| ABV71351.1     | 0.00643  | ABV71350.1     | 0.005    | ACJ24815.1     | 0.02156  |
| AAAY00137.1    | 0.00504  | AAAY00115.1    | 1.60E-04 | AAAY00118.1    | 0.01612  |
| AAAY00058.1    | 0.0099   | AAAY00114.1    | 0.02102  | AAAY00112.1    | 1.40E-04 |
| AAAY00055.1    | 1.60E-04 | AAAY00132.1    | 0.00939  | AAAY00096.1    | 0.00471  |
| CAC94008.1     | 1.40E-04 | AAAY33863.1    | 1.40E-04 | ABQ08178.1     | 1.50E-04 |
| ACJ24813.1     | 1.40E-04 | ABQ08179.1     | 0.00466  | ABQ08176.1     | 1.50E-04 |
| AAP68698.1     | 0.04581  | AAD38786.1     | 0.00394  | ABY85790.1     | 0.01776  |
| AAM93545.1     | 0.01922  | ACN22185.1     | 0.01403  | XP_367294.2    | 0.05039  |
| ABS85549.1     | 0.01748  | AAL05883.1     | 0.02727  | ABD47522.2     | 0.01019  |
| XP_001910795.1 | 0.04655  | AAP68699.1     | 0.01855  | XP_960586.2    | 0.01319  |
| CBI54371.1     | 1.00E-04 | CAM35471.1     | 0.00268  | XP_001219763.1 | 0.10034  |
| AAO60166.1     | 0.08114  | CAB44719.1     | 0.02244  | EEY14472.1     | 1.60E-04 |
| ACN32207.1     | 0.01413  | BAA18956.1     | 0.02006  | AAN59953.1     | 0.06384  |
| AAP79125.1     | 0.01412  | AAP79129.1     | 1.60E-04 | XP_001586760.1 | 0.01389  |
| XP_001554288.1 | 0.00548  | AAR90248.1     | 1.40E-04 | ABQ08164.1     | 0.12098  |
| ABQ08168.1     | 0.0646   | AAAY00077.1    | 0.06476  | ABG91136.3     | 0.05351  |
| ACJ24816.1     | 0.04988  | ACJ24817.1     | 0.07924  | ACJ24814.1     | 0.09019  |
| AAAY00131.1    | 1.40E-04 | AAAY00133.1    | 0.00495  | AAAY00135.1    | 0.0526   |
| AAAY00110.1    | 0.02129  | XP_002146110.1 | 0.30708  | XP_681178.1    | 0.36102  |
| AAR90251.1     | 1.50E-04 | XP_001559596.1 | 1.40E-04 | XP_002488697.1 | 0.3625   |
| XP_001225797.1 | 0.30342  | XP_002151003.1 | 0.23772  | XP_362767.2    | 0.46719  |
| ACD39753.1     | 0        | ACD39762.1     | 0        | ABB90282.1     | 0        |
| XP_382571.1    | 0        | AAS57297.1     | 1.60E-04 | XP_002376293.1 | 0.92502  |
| XP_002568275.1 | 0.1328   | ACD39770.1     | 0.10516  | ACM42403.1     | 0.07589  |
| XP_369003.2    | 0.55377  | XP_001905653.1 | 0.15042  | XP_002145720.1 | 0.17046  |
| XP_001245248.1 | 1.40E-04 | EER29448.1     | 0.00282  | XP_664052.1    | 0.21758  |
| XP_001554297.1 | 0        | AAR90254.1     | 0        | XP_001228055.1 | 0.24566  |
| XP_001212807.1 | 0.16678  | XP_002339967.1 | 0.18378  | XP_001226720.1 | 0.25314  |
| XP_001209382.1 | 0.0434   | XP_681652.1    | 0.11752  | EER26821.1     | 1.50E-04 |
| XP_001243721.1 | 0.00281  | XP_002542778.1 | 0.07304  | XP_002843683.1 | 0.13744  |
| XP_001797044.1 | 0.15481  | XP_001906796.1 | 0.39919  | XP_001592866.1 | 0.09894  |
| XP_002487764.1 | 0.10455  | XP_001230105.1 | 0.11243  | XP_001273603.1 | 0.23512  |
| ABS86048.1     | 0.05616  | XP_001545394.1 | 0        | AAR90255.1     | 0        |

## KS3 Group 3M

|                |          |                |          |                |          |
|----------------|----------|----------------|----------|----------------|----------|
| XP_365166.2    | 0.32025  | XP_002149737.1 | 0.04855  | XP_002340070.1 | 0.01544  |
| XP_001212610.1 | 0.338    | XP_001393501.1 | 0.19421  | XP_002340038.1 | 0.03458  |
| XP_002149769.1 | 0.03314  | XP_660834.1    | 0.33     | XP_002379030.1 | 0        |
| XP_001823618.1 | 0        | XP_002846669.1 | 0.06588  | XP_001246130.1 | 0.00551  |
| EER25597.1     | 1.40E-04 | CAD19100.1     | 0.19833  | XP_659636.1    | 0.30852  |
| XP_001225301.1 | 0.06538  | XP_658638.1    | 0.04992  | XP_001216282.1 | 0.03142  |
| XP_001390084.1 | 0.42055  | XP_001827405.1 | 0.00801  | XP_002384603.1 | 1.40E-04 |
| ABS58604.1     | 0.15931  | XP_002848394.1 | 0.06308  | EFE42799.1     | 0.00872  |
| EFE29950.1     | 1.40E-04 | XP_658127.1    | 0.10579  | XP_001818926.1 | 0.00331  |
| XP_002381902.1 | 0.00517  | AAR90253.1     | 0        | XP_001559289.1 | 0        |
| AAAY33862.1    | 0.00285  | BAD44749.1     | 1.40E-04 | XP_001258915.1 | 0.19505  |
| XP_001273475.1 | 0.18965  | XP_748578.1    | 0.36662  | XP_001395291.1 | 0.16811  |
| XP_660990.1    | 0.12068  | XP_001217248.1 | 0.0729   | XP_002384396.1 | 0.00557  |
| XP_001827158.1 | 1.60E-04 | XP_002481993.1 | 0.24426  | CAN87161.2     | 0.31658  |
| EER28084.1     | 0.00582  | XP_001243185.1 | 0.02032  | XP_002487778.1 | 0.03559  |
| XP_681172.1    | 0.02111  | AAR90275.1     | 0.08985  | ACS74448.1     | 0.00741  |
| ACS74447.1     | 0.03954  | XP_002567553.1 | 0.2694   | XP_384764.1    | 0.01739  |
| AAS57298.1     | 0.01382  | AAX62330.1     | 0.3106   | EDP48973.1     | 0        |
| XP_746971.1    | 0        | XP_001261880.1 | 0.01265  | XP_001554442.1 | 0        |
| AAR90256.1     | 0        | XP_001393524.1 | 0.21179  | XP_001816639.1 | 0.15854  |
| XP_002340065.1 | 0.06425  | XP_002149742.1 | 0.01684  | XP_001550802.1 | 0.17894  |
| ACS74446.1     | 0.04775  | ACS74445.1     | 0.03632  | XP_001797375.1 | 0.04957  |
| AAR90277.1     | 0.1343   | XP_001937752.1 | 0.01899  | AAR90276.1     | 0.03703  |

KS3 Group 3N

| Sequence       | Distance | Sequence       | Distance | Sequence       | Distance |
|----------------|----------|----------------|----------|----------------|----------|
| NP_929153.1    | 0.03061  | YP_003041506.1 | 0.04065  | ABJ98760.1     | 0.3656   |
| BAI44065.1     | 0.36331  | ZP_05014772.1  | 0        | ZP_06913928.1  | 0        |
| YP_001106768.1 | 0.48983  | ZP_06905574.1  | 0.57538  | YP_003660268.1 | 0.15662  |
| YP_001704304.1 | 0.12873  | ZP_05511692.1  | 0.34463  | YP_003491850.1 | 0.05605  |
| ZP_06769930.1  | 1.40E-04 | ZP_05005547.1  | 1.40E-04 | YP_002784201.1 | 0.15378  |
| YP_001106500.1 | 0.13613  | ACZ65476.1     | 0.27882  | YP_439407.1    | 0        |
| ZP_02384596.1  | 0        | ZP_02370710.1  | 1.50E-04 | ZP_04522671.1  | 0.00283  |
| YP_001062672.1 | 0.00566  | ZP_02451502.1  | 0        | ZP_02509907.1  | 0        |
| ZP_04953343.1  | 0        | ZP_02485669.1  | 0        | YP_111207.1    | 0        |
| ZP_01770943.1  | 0        | ZP_03788956.1  | 0        | YP_001075629.1 | 0        |
| YP_335348.1    | 1.40E-04 | ZP_03449943.1  | 0.00281  | ZP_04898559.1  | 0.00282  |
| ZP_02493828.1  | 0.00283  | ZP_02415419.1  | 0.00284  | ZP_02406927.1  | 0.003    |
| ZP_02459680.1  | 1.40E-04 | AAQ91796.1     | 0.40564  | ZP_04750193.1  | 0.78978  |
| ABQ85802.1     | 1.02278  | AAX86997.1     | 0.92582  | ABQ85800.1     | 0.46022  |
| ABQ85797.1     | 0.39576  | ABQ50542.1     | 0.85622  | ABQ85798.1     | 1.94436  |
| ABQ85803.1     | 1.19413  | ABQ85796.1     | 0.88647  | ABQ85801.1     | 1.52532  |
| EEE30779.1     | 0        | EEE22142.1     | 0        | XP_665783.1    | 0.6768   |
| XP_666606.1    | 0.46585  | XP_667412.1    | 0.4449   | EEE20416.1     | 0.39467  |
| EEE20417.1     | 0.11872  | EEE19009.1     | 0.18126  | AAV68343.1     | 0.65735  |
| AAX39747.1     | 0.0374   | AAX39748.1     | 0.09037  | EEH59311.1     | 0.76828  |
| EEH59312.1     | 0.66635  | EEH51938.1     | 0.58104  | EEH59308.1     | 0.26211  |
| EEH59309.1     | 0.23292  | CAL56184.1     | 0.01661  | EEH51937.1     | 0.75106  |
| EEH51940.1     | 0.67838  | EEH51939.1     | 0.68542  | EEH59316.1     | 1.1411   |
| EEH59320.1     | 1.50E-04 | EEH59318.1     | 0.00965  | YP_003117672.1 | 0.55366  |
| ABK01383.1     | 0.47521  | BAE93739.1     | 0.2976   | ZP_04608939.1  | 0.20005  |
| ZP_04456870.1  | 0        | NP_670704.1    | 0        | ZP_06204702.1  | 0        |
| ACY61373.1     | 0        | NP_994707.1    | 0        | YP_003566888.1 | 0.01264  |
| YP_001719505.1 | 0        | YP_001873845.1 | 0        | YP_071788.1    | 0        |
| YP_001399673.1 | 0.00302  | ZP_02380485.1  | 0.32282  | YP_003073811.1 | 0.43339  |
| ZP_02189726.1  | 0.64592  | ABK32263.1     | 0.53969  | ZP_05529765.1  | 0.48324  |
| ACZ54363.1     | 0.20059  | YP_533222.1    | 0.56544  | NP_519927.1    | 0.28751  |
| YP_532900.1    | 0.23977  | YP_003262843.1 | 0.4973   | ZP_05511668.1  | 0.30692  |
| ZP_04691244.1  | 0.15924  | ACZ54311.1     | 0.2168   | BAB69235.1     | 0        |
| NP_828360.1    | 0        | YP_001510033.1 | 0.11345  | ACZ54323.1     | 0.02686  |
| ACZ54313.1     | 0.27098  | NP_823457.1    | 0.31699  | ZP_05480793.1  | 0.19885  |
| ACZ54283.1     | 0.17278  | ADI03643.1     | 0.25995  | ZP_01461605.1  | 0.32998  |
| BAG69130.1     | 0.37763  | ACY71556.1     | 0.16853  | ACY71551.1     | 0.09576  |
| ZP_03310385.1  | 0.46265  | ZP_05843280.1  | 0.51205  | ACY71548.1     | 0.00974  |
| ACY71575.1     | 0.00971  | BAG69041.1     | 1.40E-04 | ACY71563.1     | 0.00985  |
| ABD17650.1     | 0.01001  | AAW84222.1     | 0.26711  | AAX62324.1     | 0.08802  |
| YP_564530.1    | 0.15512  | AAX62326.1     | 0.17365  | YP_552078.1    | 0.60977  |
| YP_002907573.1 | 0.54556  | ABK01390.1     | 0.26597  | BAG69019.1     | 0.28624  |

KS3 Group 3N

|                |          |                |          |                |          |
|----------------|----------|----------------|----------|----------------|----------|
| ZP_06890643.1  | 0.38812  | ZP_02382204.1  | 0.46678  | ACZ54331.1     | 0.35773  |
| ACY71581.1     | 0.36916  | ACF54732.1     | 0.23149  | BAG69105.1     | 0.43498  |
| ZP_01913248.1  | 0.28237  | ABD17651.1     | 0.24036  | ABG20987.1     | 0.37811  |
| ZP_01913463.1  | 0.4343   | ZP_01913249.1  | 0.42071  | ACZ54290.1     | 0.36479  |
| ABK01387.1     | 0.48417  | ZP_02189725.1  | 0.45907  | CAM17821.1     | 0.52261  |
| AAW03325.1     | 0.04841  | CAD89773.1     | 0.04696  | BAG68970.1     | 0.05287  |
| ZP_01467359.1  | 0.07041  | ZP_05519867.1  | 0.2855   | ZP_04696768.1  | 0.01707  |
| ZP_06587689.1  | 0.4046   | ACZ54330.1     | 0.08477  | ACX31695.1     | 0.03557  |
| ADF57387.1     | 0.35089  | ABU25211.1     | 0.0832   | ADC68457.1     | 1.50E-04 |
| ADC68459.1     | 0.007    | ADC68458.1     | 0.08669  | ADC68465.1     | 0.06905  |
| ADC68514.1     | 0.01139  | ADC68492.1     | 0.01144  | ADC68493.1     | 1.40E-04 |
| ADC68512.1     | 0.03531  | ACY71544.1     | 0.01473  | BAG69075.1     | 0.06848  |
| BAG69090.1     | 1.40E-04 | BAG69076.1     | 0.00485  | BAG69091.1     | 1.40E-04 |
| ACY71542.1     | 0.0048   | BAG69049.1     | 0.00466  | BAG69077.1     | 1.40E-04 |
| ACY71571.1     | 0.1406   | ABD17646.1     | 1.40E-04 | ABD17645.1     | 0.00921  |
| ABD17647.1     | 0.06929  | ABK32290.1     | 0.02322  | ABK32258.1     | 0.01076  |
| ABD17649.1     | 0.03635  | ABD17648.1     | 0.08539  | ADH04640.1     | 0.12611  |
| ADH04659.1     | 0.12482  | ABD17640.1     | 0.13413  | YP_003267362.1 | 0.18921  |
| ABD17641.1     | 0.09896  | ABD17644.1     | 0.18403  | YP_003267360.1 | 0.26917  |
| ABD17642.1     | 0.02127  | ABD17643.1     | 0.00981  | CAD43448.1     | 0.08707  |
| ACY71554.1     | 0.00476  | CAL58683.1     | 1.40E-04 | ACY71577.1     | 0.00458  |
| ACY71552.1     | 1.50E-04 | ABD17639.1     | 0.0568   | ABD17638.1     | 1.50E-04 |
| BAG69085.1     | 0.00962  | ABD17637.1     | 0.01471  | ACY71550.1     | 0.00503  |
| BAG69073.1     | 1.40E-04 | ACY71553.1     | 0.00494  | ACY71540.1     | 1.40E-04 |
| ZP_06769488.1  | 0.13181  | BAH67451.1     | 0.119    | AAZ94391.1     | 0.01865  |
| YP_003493866.1 | 0.00917  | BAH68013.1     | 0.26616  | BAI44044.1     | 0.03108  |
| BAI44045.1     | 0.05849  | BAH67539.1     | 0.1224   | ACZ54364.1     | 0.04082  |
| ABB88521.1     | 0.02313  | ADC68440.1     | 0.14796  | BAD08358.1     | 0.05679  |
| BAH68285.1     | 1.40E-04 | BAH68116.1     | 0.00303  | BAH68288.1     | 0.00619  |
| ADC68450.1     | 0.14285  | ADC68451.1     | 0.11621  | BAH67295.1     | 0.12764  |
| BAH67294.1     | 0.08684  | ADC68472.1     | 0.00312  | ADC68466.1     | 1.50E-04 |
| ADC68475.1     | 0.00546  | BAH67538.1     | 0.09042  | BAH68006.1     | 0.08183  |
| BAH67541.1     | 0.05061  | BAH68042.1     | 0.06793  | BAH67200.1     | 0.03666  |
| BAH67553.1     | 0.01947  | BAH68115.1     | 0.19371  | BAH67388.1     | 0.12342  |
| BAH67061.1     | 0.03335  | BAH67853.1     | 0.03717  | BAH68142.1     | 0.03573  |
| ACS45379.1     | 0.00474  | ACR61391.1     | 1.40E-04 | ZP_05000637.1  | 0.08282  |
| BAH67372.1     | 0.01952  | BAH67105.1     | 0.02369  | ZP_05517720.1  | 0.02125  |
| ZP_05517721.1  | 0.02637  | BAH66986.1     | 0.0102   | BAH66951.1     | 0.01849  |
| ACZ54345.1     | 0.09325  | ACZ54348.1     | 0.15085  | ACZ54347.1     | 0.02145  |
| ACZ54346.1     | 1.40E-04 | YP_003100464.1 | 0.21877  | ACZ54303.1     | 0.0685   |
| YP_001159599.1 | 0.02076  | YP_712781.1    | 0.1944   | YP_712780.1    | 0.10581  |
| BAH67212.1     | 0.07877  | BAH67430.1     | 0.09318  | BAH68156.1     | 0.07625  |
| BAH68253.1     | 0.19352  | BAH67455.1     | 0.11398  | BAH68048.1     | 0.10468  |

KS3 Group 3N

|                |          |                |          |                |          |
|----------------|----------|----------------|----------|----------------|----------|
| YP_001852062.1 | 0.11168  | ZP_06847129.1  | 0.05604  | ZP_05228219.1  | 0.02123  |
| YP_882293.1    | 1.50E-04 | NP_960304.1    | 0.01659  | ZP_05217076.1  | 0.00244  |
| ZP_04752113.1  | 0.03984  | YP_001850776.1 | 0.02876  | ZP_05141116.1  | 0        |
| ZP_03420117.1  | 0        | ZP_03416215.1  | 0        | ZP_03532164.1  | 0        |
| ZP_05772422.1  | 0        | ZP_04925186.1  | 0        | NP_216177.1    | 0        |
| NP_855341.1    | 0        | ZP_03428473.1  | 0.00275  | ZP_06509591.1  | 0        |
| ZP_03536656.1  | 0        | ZP_06517145.1  | 0.00369  | YP_001850777.1 | 0.05436  |
| ZP_04752033.1  | 0.05529  | ZP_06847131.1  | 0.03739  | ZP_05225901.1  | 0.03225  |
| YP_882292.1    | 0.00541  | ZP_05217075.1  | 1.40E-04 | NP_960305.1    | 1.50E-04 |
| AAF82077.1     | 1.40E-04 | ZP_05768217.1  | 0.00545  | ZP_03536657.1  | 0.02237  |
| ZP_03532166.1  | 1.40E-04 | NP_336155.1    | 0        | ZP_03420118.1  | 0        |
| NP_216178.1    | 0        | ZP_03416214.1  | 0        | YP_001287625.1 | 0        |
| ZP_05772423.1  | 0        | ZP_06517149.1  | length   | NP_855342.1    | 0        |
| YP_977793.1    | 0        | ZP_03432600.1  | 1.40E-04 | ZP_06513130.1  | 0.00569  |
| BAH66954.1     | 0.14332  | ZP_06847686.1  | 0.09858  | ZP_04752046.1  | 0.08488  |
| ZP_06510017.1  | 0.00262  | ZP_06521583.1  | 1.40E-04 | ZP_06443379.1  | 1.40E-04 |
| ZP_04751866.1  | 0.02786  | ZP_06847687.1  | 0.04742  |                | 1.40E-04 |
| ZP_03425336.1  | 0        | ZP_05141522.1  | 0        | ZP_06517546.1  | 0        |
| ZP_06433293.1  | 0        | ZP_06505377.1  | 0        | ZP_06513536.1  | 0        |
| ZP_06450386.1  | 0        | ZP_06443378.1  | 1.40E-04 | ZP_05219179.1  | 0.00711  |
| NP_301229.1    | 0.02613  | ZP_04750446.1  | 0.04437  | YP_001850066.1 | 1.40E-04 |
| YP_905915.1    | 0.00275  | ZP_05765442.1  | 0        | ZP_06438358.1  | 0        |
| ZP_03429814.1  | 0        | ZP_05773758.1  | 0        | ZP_06451367.1  | 0        |
| NP_856616.1    | 0        | ZP_06455879.1  | 0        | ZP_06514440.1  | 0        |
| NP_217463.1    | 1.40E-04 | AAA50929.1     | 1.40E-04 | ZP_03417103.1  | 0        |
| ZP_03533501.1  | 0        | NP_337532.1    | 0        | ZP_06506124.1  | 0        |
| YP_003030964.1 | 0        | ZP_06739442.1  | 0        | ZP_03426313.1  | 0.00243  |
| ZP_06434251.1  | 0.00382  | YP_001848428.1 | 0.0033   | YP_001848427.1 | 0.00219  |
| YP_001851388.1 | 0.02545  | YP_001851389.1 | 0.04526  | ACZ54306.1     | 0.07752  |
| BAH68201.1     | 0.0032   | BAH67764.1     | 0.00953  | BAH67879.1     | 0.00317  |
| BAH68210.1     | 0.08938  | BAI44057.1     | 0.05582  | BAH67765.1     | 0.0133   |
| BAH67761.1     | 1.60E-04 | BAH68193.1     | 0.00295  | BAH68185.1     | 0.00597  |
| BAH68195.1     | 0.00302  | BAH68228.1     | 0.02454  | ZP_05512282.1  | 0.06987  |
| ZP_05512279.1  | 0.11727  | ZP_05512289.1  | 0.071    | BAH67766.1     | 1.40E-04 |
| BAH67771.1     | 0.00341  | BAI44034.1     | 0.10061  | ZP_05512278.1  | 0.06504  |
| BAI44035.1     | 0.07339  | BAH67751.1     | 0.04027  | BAH67762.1     | 1.50E-04 |
| BAH68239.1     | 0.02218  | ZP_05512275.1  | 0.10544  | BAH68219.1     | 0.18615  |
| YP_003648396.1 | 0.29268  | CAE45670.1     | 0.19477  | BAH67472.1     | 0.16821  |
| BAH67738.1     | 0.28542  | YP_003117674.1 | 0.24982  | YP_003117673.1 | 0.19264  |
| BAH68280.1     | 0.35818  | BAH67998.1     | 0.26829  | ACZ54355.1     | 0.23931  |
| ZP_06275819.1  | 0.25537  | ZP_04608883.1  | 0.15174  | ZP_05482463.1  | 0.17814  |
| ZP_04696765.1  | 0        | ZP_06587686.1  | 0        | ZP_04711958.1  | 0        |
| BAH68044.1     | 0.19032  | ZP_05520482.1  | 0.02662  | BAH67086.1     | 0.04685  |

KS3 Group 3N

|                |          |                |          |                |          |
|----------------|----------|----------------|----------|----------------|----------|
| ZP_04608880.1  | 0.11443  | ZP_04608881.1  | 0.11531  | BAH67891.1     | 0.0906   |
| ZP_05480587.1  | 0.25272  | ZP_04711950.1  | 0        | ZP_04696758.1  | 0        |
| ZP_06587678.1  | 0        | BAH66946.1     | 0.09211  | BAH67508.1     | 0.01296  |
| BAH67644.1     | 0.08064  | BAH66945.1     | 0.00769  | BAH67249.1     | 0.00261  |
| BAH67385.1     | 0.02212  | BAH67642.1     | 0.03576  | BAH67504.1     | 0.16144  |
| ZP_06275821.1  | 0.0644   | BAH67956.1     | 0.22767  | BAH67723.1     | 0.17675  |
| BAH67720.1     | 0.14222  | BAH68084.1     | 0.01009  | BAH67422.1     | 1.40E-04 |
| ADC68516.1     | 0.12039  | ADC68513.1     | 0.05055  | ADC68490.1     | 0.1227   |
| ADC68471.1     | 0.20036  | ADC68463.1     | 0.18716  | BAH67128.1     | 0.04406  |
| BAH67136.1     | 0.05034  | BAH67893.1     | 0.21027  | BAH68244.1     | 0.0327   |
| BAH68264.1     | 0.06582  | ZP_05482481.1  | 0.23325  | ZP_05482464.1  | 0.12117  |
| ADC68510.1     | 0.25372  | BAH67225.1     | 0.19858  | YP_710634.1    | 0.13599  |
| CAB41040.1     | 0.02346  | AAR16521.1     | 0.09591  | BAH67273.1     | 0.08101  |
| ZP_04700397.1  | 0        | ZP_06589184.1  | 0        | AAQ82561.1     | 0        |
| ADC68489.1     | 0.01734  | BAH68053.1     | 0.15751  | ADC68477.1     | 0.11956  |
| BAH68052.1     | 0.06898  | BAH68122.1     | 0.07434  | BAH67322.1     | 0.05485  |
| ZP_06710511.1  | 0.06739  | ZP_06710512.1  | 0.08337  | BAH67215.1     | 0.06572  |
| ZP_06710508.1  | 0.15952  | BAH67084.1     | 0.10103  | AAP45192.1     | 0        |
| AAO61221.1     | 0        | ABB86420.1     | 0.01271  | ADC68480.1     | 0.18187  |
| BAH68054.1     | 0.10704  | AAO61200.1     | 0.1787   | BAH67844.1     | 0.23977  |
| ACZ54293.1     | 0.06485  | BAH67635.1     | 0.05841  | BAH67959.1     | 0.00304  |
| BAH68297.1     | 0.00308  | ACZ54294.1     | 0.08311  | BAH67957.1     | 0.06478  |
| ACZ54295.1     | 0.12282  | CAA11037.1     | 0.11036  | AAT68460.1     | 1.40E-04 |
| YP_001536144.1 | 0.00454  | AAT68463.1     | 0.00474  | AAT68461.1     | 1.40E-04 |
| CAA11038.1     | 0.0981   | YP_001536145.1 | 0.00492  | AAT68464.1     | 0.02381  |
| BAH67465.1     | 0.01463  | BAH68299.1     | 0.00625  | BAH67961.1     | 1.40E-04 |
| BAH67636.1     | 0.10963  | BAH68298.1     | 1.40E-04 | BAH67960.1     | 0.00308  |
| BAH67466.1     | 0.10744  | CAI30444.1     | 0.18299  | ABB86422.1     | 0.01392  |
| ABB86421.1     | 0.04188  | AAP45193.1     | 0.02311  | YP_001509108.1 | 0.1783   |
| ZP_06414402.1  | 0.19055  | BAH67217.1     | 0.1      | ZP_06710509.1  | length   |
| ZP_06413765.1  | 0.14419  | YP_001509109.1 | 0.10063  | ZP_06417924.1  | 0.10115  |
| ABB86423.1     | 0.01682  | AAN63813.1     | 0.01063  | ZP_04706936.1  | 0.05844  |
| XP_001227954.1 | 2.23768  | ZP_04691738.1  | 0        | ZP_06582622.1  | 0        |
| ZP_04706931.1  | 1.40E-04 | BAF02927.1     | 0.17217  | ADI04663.1     | 0.1419   |
| ADC68501.1     | 0.14604  | BAH67437.1     | 0.09844  | BAH67235.1     | 0.01187  |
| BAH67005.1     | 0.01291  | BAI44058.1     | 0.24448  | BAH67290.1     | 0.17444  |
| BAH67133.1     | 0.21686  | ZP_06283286.1  | 0.26629  | BAH67338.1     | 0.1902   |
| ABH08748.1     | 0.33786  | BAH67819.1     | 0.18407  | BAH67397.1     | 0.15455  |
| BAH67820.1     | 0.15468  | BAH67818.1     | 0.14044  | ZP_04700404.1  | 0.02387  |
| BAI44067.1     | 0.02096  | BAH68196.1     | 0.29519  | BAH68008.1     | 0.06701  |
| BAH68045.1     | 0.05694  | BAH67516.1     | 0.19242  | ACZ54314.1     | 0.05836  |
| ACZ54315.1     | 0.11063  | ZP_05517704.1  | 0.16206  | ZP_05000626.1  | 0.09019  |
| BAH67978.1     | 0.04576  | ZP_05517708.1  | 0.03275  | ACZ54338.1     | 0.23931  |



KS3 Group 3N

|               |          |                |          |               |          |
|---------------|----------|----------------|----------|---------------|----------|
| ACZ54321.1    | 0.0125   | ACZ54322.1     | 0.03267  | BAH66990.1    | 0.01874  |
| BAH67063.1    | 0.03136  | BAH67167.1     | 0.03486  | BAH66992.1    | 0.00913  |
| BAH67064.1    | 0.02215  | BAH67092.1     | 1.40E-04 | BAH68135.1    | 0.01258  |
| BAH67705.1    | 0.14103  | BAH67746.1     | 0.01419  | BAH68091.1    | 0.01091  |
| BAG85032.1    | 0.01907  | CAQ64692.1     | 0.07636  | ADC68485.1    | 0.03743  |
| ADC68486.1    | 0.06132  | BAH67568.1     | 0.17264  | ZP_05514807.1 | 0.15173  |
| ADC68473.1    | 0.21137  | ADC68474.1     | 0.16247  | ACN69991.1    | 0.19545  |
| BAH67363.1    | 0.13387  | BAH67365.1     | 0.10981  | ADI04507.1    | 0.13456  |
| BAH67029.1    | 0.14745  | BAH67024.1     | 0.18661  | BAH67376.1    | 0.07272  |
| BAH68259.1    | 0.01073  | BAH67025.1     | 0.00462  | BAG85029.1    | 0        |
| CAQ64689.1    | 0        | ADI04505.1     | 0.10971  | BAH67026.1    | 0.06198  |
| BAH67027.1    | 0.0179   | ZP_05511713.1  | 0.04748  | BAH67741.1    | 0.05379  |
| BAH67048.1    | 0.20556  | BAH67046.1     | 0.15454  | BAH67289.1    | 0.02065  |
| BAH67288.1    | 0.01386  | BAH67286.1     | 0.01692  | BAH67285.1    | 0.01118  |
| BAH67513.1    | 0        | BAH68289.1     | 0        | BAH67645.1    | 0.20398  |
| ZP_06283324.1 | 0.13423  | BAH68272.1     | 0.03435  | BAH68273.1    | 0.02947  |
| ZP_06283318.1 | 0.00575  | ADC68442.1     | 0.01708  | ADC68436.1    | 0.10621  |
| BAH68080.1    | 0.08256  | BAH68082.1     | 0.11149  | BAH68081.1    | 0.13899  |
| ZP_06283285.1 | 0.14166  | CAE02605.1     | 0.11758  | CAO85897.1    | 0.09038  |
| ACZ54320.1    | 0.30272  | BAH67774.1     | 0.18015  | ZP_05511708.1 | 0.19971  |
| BAH68131.1    | 0.0232   | BAH66955.1     | 0.04754  | BAH67160.1    | 0.03371  |
| BAH67130.1    | 0.19178  | AAC69332.1     | 0.30496  | BAH67661.1    | 0.14895  |
| BAH67682.1    | 0.02984  | BAH67817.1     | 0.26217  | ADI04508.1    | 0.2091   |
| BAH67377.1    | 0.04455  | ADI04506.1     | 0.0773   | BAH67028.1    | 0.09932  |
| ZP_06564496.1 | 1.40E-04 | YP_001106334.1 | 1.40E-04 | BAH67134.1    | 0.04257  |
| ABB88534.1    | 0.05191  | BAH68061.1     | 0.01292  | BAH68256.1    | 0.01604  |
| ZP_05512321.1 | 0.12776  | BAH67407.1     | 0.09461  | BAH68000.1    | 1.40E-04 |
| BAH68040.1    | 0.01568  | BAH67445.1     | 0.0642   | BAH67920.1    | 0.00616  |
| ABU25213.1    | 0.01413  | ZP_04700414.1  | 0.00307  | BAH67831.1    | 1.40E-04 |
| BAH67826.1    | 0.00306  | BAH67238.1     | 1.40E-04 | ZP_04700413.1 | 0        |
| ZP_06589195.1 | 0        | BAH67300.1     | 0.10574  | BAH67264.1    | 0.04291  |
| ZP_05512318.1 | 0.14528  | BAH67401.1     | 0.06174  | BAH67008.1    | 0.15347  |
| BAH67115.1    | 0.06926  | BAH66989.1     | 0.04635  | BAH67074.1    | 0.03593  |
| BAH67291.1    | 0.22264  | ZP_05520505.1  | 0.16283  | ADI11525.1    | 1.50E-04 |
| AAP42867.1    | 0.0081   | AAO65807.1     | 0.20517  | BAH67570.1    | 0.20482  |
| BAH67530.1    | 0.04134  | YP_001827588.1 | 1.60E-04 | ZP_06283084.1 | 1.40E-04 |
| BAH67040.1    | 0.00309  | ADC68441.1     | 0.22074  | ADC68435.1    | 0.05313  |
| ADC68443.1    | 0.00587  | BAH67528.1     | 0.03277  | BAH67038.1    | 0.00238  |
| CAE45671.1    | 0.20015  | BAI44063.1     | 1.50E-04 | BAH66965.1    | 0.11847  |
| ADC68445.1    | 0.29579  | ADC68495.1     | 0.18944  | BAH67454.1    | 0.21547  |
| BAH67658.1    | 0.08     | BAH66926.1     | 0.14304  | ADC68434.1    | 0.2133   |
| BAI44048.1    | 0.23262  | BAH68083.1     | 0.25256  | ZP_04604291.1 | 0.15924  |
| BAH67896.1    | 0.03659  | BAI44066.1     | 0.10302  | BAH67919.1    | 1.50E-04 |

KS3 Group 3N

|               |         |                |          |               |          |
|---------------|---------|----------------|----------|---------------|----------|
| BAH67790.1    | 0.04118 | BAH68051.1     | 1.40E-04 | BAH68055.1    | 0.00315  |
| BAH67742.1    | 0.19395 | BAI44042.1     | 0.16177  | BAH67427.1    | 0.03958  |
| BAH67889.1    | 0.01203 | YP_714267.1    | 0.3313   | ACZ54352.1    | 0.1176   |
| ACZ54354.1    | 0.19836 | BAH57740.1     | 0.19376  | ACZ54353.1    | 0.10661  |
| BAH67760.1    | 0.18073 | BAH68086.1     | 0.13677  | ZP_04700416.1 | 0.04547  |
| BAI44068.1    | 0.03666 | BAH67909.1     | 0.05119  | BAH67104.1    | 0.04618  |
| BAH67256.1    | 0.01106 | BAH66983.1     | 0.01234  | BAH67404.1    | 0.01641  |
| BAH67478.1    | 0.00743 | YP_001537953.1 | 0.29364  | BAH67499.1    | 0.21729  |
| ZP_06397562.1 | 0.20971 | BAH67312.1     | 0.17875  | BAH67147.1    | 0.17552  |
| BAH67691.1    | 0.23343 | AAS46347.1     | 0.08117  | NP_824069.1   | 0.03651  |
| BAH67722.1    | 0.04655 | BAH67725.1     | 0.1294   | BAH67726.1    | 0.19458  |
| ACZ54367.1    | 0.08527 | ACZ54366.1     | 0.10443  | BAI44054.1    | 0.18028  |
| ABG02263.1    | 0.00515 | BAC54914.1     | 0.00283  | BAH67398.1    | 0.27002  |
| ZP_06418134.1 | 0.06456 | ZP_06418475.1  | 1.40E-04 | BAA87896.1    | 0.2441   |
| BAH66973.1    | 0.17775 | ADC68470.1     | 0.20885  | ADC68460.1    | 0.1062   |
| CAI30441.1    | 0.20498 | ZP_05514804.1  | 0.19439  | ADC79637.1    | 0.11418  |
| BAH67320.1    | 0.16291 | BAH66964.1     | 0.20292  | BAH67745.1    | 0.02325  |
| BAH67775.1    | 0.03297 | BAI44041.1     | 0.08491  | BAH66975.1    | 0.03479  |
| BAH67912.1    | 0.06765 | BAH67088.1     | 0.01994  | BAH67116.1    | 0.03807  |
| BAH67112.1    | 0.04669 | BAH67592.1     | 0.00313  | BAH67505.1    | 1.40E-04 |
| BAH67605.1    | 0.00312 | BAH67609.1     | 1.40E-04 | BAH67673.1    | 1.20E-04 |
| BAH67676.1    | 0.00603 | BAH67688.1     | 0.012    | BAH68103.1    | 0.01657  |
| BAH68209.1    | 0.041   | ZP_06574372.1  | 1.40E-04 | ZP_04683619.1 | 1.40E-04 |
| BAH67168.1    | 0.00895 | BAH67166.1     | 0.00634  | BAH67165.1    | 0.00677  |
| BAH66956.1    | 0.01512 | BAH67343.1     | 0.09656  | BAH67375.1    | 0.09276  |
| BAH67022.1    | 0.05114 | BAH68218.1     | 0.1697   | ADC68481.1    | 0.03747  |
| BAG85026.1    | 0.05752 | BAH66957.1     | 0.25046  |               |          |
